# Supplementary material for: Effect of strip clear-cutting on the natural regeneration of Pinus tabuliformis plantations in northeastern China
Source: PeerJ. 2022 Apr 28;10:e13341. doi: 10.7717/peerj.13341 (PMC9057292; doi:10.7717/peerj.13341)
Supplement: Supplemental Information 1 [file peerj-10-13341-s001.xlsx]

## Sheet: sapling regeneration
Type	Width	number plot	number of seeding	number of saping	sapling number	effect sapling (height>30cm)、seeding (height<30cm)			branch length for the first whorl
						age	current height/cm	total height/cm	branch 1	branch 2	branch 3	branch 4	branch 5	branch 6	branch 7
clear-cut strip	25	1	0	7	1	21	14	250	10	5	11	8
clear-cut strip	25	1	0	7	2	18	10	183	8	8	13
clear-cut strip	25	1	0	7	3	15	17	100	8	5	14	14	8	13
clear-cut strip	25	2	0	2	1	20	19	191	5	10	9.5	8	9
clear-cut strip	25	2	0	2	2	17	17	160	6	13	11
clear-cut strip	25	3	0	15	1	19	15	198	13	15	14	9	15
clear-cut strip	25	3	0	15	2	16	11	94	8	2.5
clear-cut strip	25	3	0	15	3	21	11	180	1	9.5	11
clear-cut strip	25	4	0	6	1	17	11	105	13	12	14
clear-cut strip	25	4	0	6	2	17	20	137	15	15	5	5
clear-cut strip	25	4	0	6	3	16	30	115	16	15	23	23	10	21
clear-cut strip	25	5	0	1	1	16	17	103	12.5	8.5
clear-cut strip	25	8	0	24	1	14	27	192	11	23	22	26	20
clear-cut strip	25	8	0	24	2	19	165	7	8	5	6.5
clear-cut strip	25	8	0	24	3	15	32	155	31	20	27	11
clear-cut strip	25	8	0	24	4	16	22	170	20	21	18	20	15
clear-cut strip	25	9	0	8	1	16	11	196	12	5	11	9	1
clear-cut strip	25	9	0	8	2	20	18	190	8.5	11.5	9
clear-cut strip	25	9	0	8	3	13	29	155	14	22	11	24	26
clear-cut strip	25	10	0	18	1	16	19	185	6	15	15	8	18
clear-cut strip	25	10	0	18	2	17	26	156	16	21	18
clear-cut strip	25	10	0	18	3	20	16	220	4	4
clear-cut strip	25	11	0	12	1	21	26	230	23	20	10	20	16
clear-cut strip	25	11	0	12	2	15	28	150	19	22	22
clear-cut strip	25	11	0	12	3	17	14	172	7	16	12	14
clear-cut strip	25	11	0	12	4	15	16	137	11	11	5
clear-cut strip	25	12	0	5	1	20	18.5	167	15	10	15	14
clear-cut strip	25	12	0	5	2	17	18	216	14	3	14	12
clear-cut strip	25	13	0	7	1	17	15	135	16	16	16
clear-cut strip	25	13	0	7	2	16	23	153	20	15	12	20	19	12	13
clear-cut strip	25	13	0	7	3	20	10	180	3	3
clear-cut strip	25	14	0	5	1	16	15	130	12	18	15
clear-cut strip	25	14	0	5	2	17	22	209	22	13	20	15
clear-cut strip	25	14	0	5	3	14	14	126	2	16	14	18
clear-cut strip	20	1	0	6	1	19	17	1.5	0.13	0.13	0.13
clear-cut strip	20	1	0	6	2	23	18	2.04	0.15	0.16	0.17	0.11
clear-cut strip	20	2	1	15	1	16	9	1.2	0.04	0.03	0.035
clear-cut strip	20	2	1	15	2	15	11	1.34	0.05	0.11	0.13
clear-cut strip	20	2	1	15	3	24	15	1.77	0.025	0.085	0.1
clear-cut strip	20	3	0	35	1	23	13	1.65	11	14
clear-cut strip	20	3	0	35	2	19	11	1.77	4	7.5	6.5
clear-cut strip	20	3	0	35	3	19	7.5	1.84	7
clear-cut strip	20	3	0	35	4	22	8	1.86	7	4	6
clear-cut strip	20	4	0	2	1	21	5	1.84	2.5	5	6
clear-cut strip	20	5	0	13	1	21	10	2.6	8	11	4.5
clear-cut strip	20	5	0	13	2	22	13	2.78	13	9.5	11
clear-cut strip	20	5	0	13	3	11	8	0.7	9	8.5	5.5
clear-cut strip	20	6	0	11	1	21	13	2.26	11	11	2
clear-cut strip	20	6	0	11	2	21	20	2.07	13	12	7
clear-cut strip	20	7	0	20	1	21	11	2.2	7.5
clear-cut strip	20	7	0	20	2	15	15	1.34	11	15	14.5
clear-cut strip	20	7	0	20	3	24	16	2.8	11	13	11	2.5
clear-cut strip	20	8	0	21	1	20	13	1.6	11.5	9	14	11
clear-cut strip	20	8	0	21	2	17	33	1.76	6	24	26	21	24
clear-cut strip	20	8	0	21	3	20	16	1.52	6	15	7	14
clear-cut strip	20	8	0	21	4	22	20.5	1.81	7	17	12	15	19
clear-cut strip	20	9	0	13	1	22	22	1.98	16	10	18.5	15.5
clear-cut strip	20	9	0	13	2	16	28	1.53	22	24	18
clear-cut strip	20	9	0	13	3	24	23	2.4	19	21	7.5	21
clear-cut strip	20	10	0	3	1	25	34	2.8	22	21	16	26
clear-cut strip	20	10	0	3	2	13	13	1.02	12.5	13
clear-cut strip	20	11	0	14	1	22	14	1.62	4	12	11
clear-cut strip	20	11	0	14	2	17	18	1.93	13	12	3.5	15	7
clear-cut strip	20	11	0	14	3	17	8	1.53	5	7
clear-cut strip	20	11	0	14	4	24	20	2.36	16	20	12	12
clear-cut strip	20	12	0	33	1	22	17.5	1.97	14	12	13
clear-cut strip	20	12	0	33	2	19	19	1.71	3	13	15
clear-cut strip	20	12	0	33	3	23	12	2.35	9	10	4
clear-cut strip	20	12	0	33	4	19	15.5	1.9	13	12	11.5	8
clear-cut strip	20	13	0	8	1	11	11	0.67	9	13
clear-cut strip	20	13	0	8	2	23	15	2.53	9	6
clear-cut strip	20	14	0	15	1	25	8	2.84	5	3
clear-cut strip	20	14	0	15	2	25	8.5	2.68	4.5	7	6
clear-cut strip	20	14	0	15	3	16	10	1.36	2.3	1.5	5
clear-cut strip	20	15	0	8	1	24	21	3.15	17	8	12.5
clear-cut strip	20	15	0	8	2	23	18	2.85	16	11
clear-cut strip	20	15	0	8	3	16	10	1.82	5	5
clear-cut strip	15	2	0	2	2	20	4	137	1
clear-cut strip	15	3	0	4	1	11	11.5	56	11	12.5	1
clear-cut strip	15	3	0	4	2	14	14	102	14	10	4
clear-cut strip	15	4	0	7	1	15	11	72	9	6	7
clear-cut strip	15	4	0	7	2	21	15	167	15	19	12	14
clear-cut strip	15	4	0	7	3	20	19	190	14	16	6.5	16
clear-cut strip	15	5	0	1	1	20	15	114	11	10	11	9
clear-cut strip	15	6	0	9	1	20	14	155	13	14.5	10	12
clear-cut strip	15	6	0	9	2	19	37	200	34	20	30	29
clear-cut strip	15	7	0	6	1	15	29	150	24	21	19	22	13
clear-cut strip	15	7	0	6	2	15	16	134	17	15
clear-cut strip	15	8	0	6	1	15	24	183	8	17	18	4	19
clear-cut strip	15	8	0	6	2	22	20	145	18	16	9	15	14
clear-cut strip	15	9	0	15	1	25	9	265	9	8	5
clear-cut strip	15	9	0	15	2	17	10	125	8	12
clear-cut strip	15	9	0	15	3	16	8	130	6	8
clear-cut strip	15	9	0	15	4	17	9	115	6	5	7.5
clear-cut strip	15	10	0	16	1	22	22	280	9	15	14	8.5	14
clear-cut strip	15	10	0	16	2	25	11	297	9	11	11	11
clear-cut strip	15	11	0	11	1	20	17	274	13	10
clear-cut strip	15	11	0	11	2	21	25	265	8	5
clear-cut strip	15	11	0	11	3	20	11	176	7	9.5
clear-cut strip	15	12	0	1	1	16	11	124	7	6.5	9.5
clear-cut strip	15	13	0	15	1	14	21	131	16	4	19	16	17	7
clear-cut strip	15	13	0	15	2	19	13	128	1.5	6.5	10
clear-cut strip	15	13	0	15	3	15	28	135	7.5	17	16	17
clear-cut strip	15	13	0	15	4	14	13	100	16	12	16
clear-cut strip	15	14	0	26	1	21	26	245	22	18	19	20	8
clear-cut strip	15	14	0	26	2	16	22	185	18	15
clear-cut strip	15	14	0	26	3	21	13	180	8	7	9.5
clear-cut strip	15	14	0	26	4	21	15	276	8	3	9
clear-cut strip	15	15	0	14	1	20	15	164	13	9	11	8
clear-cut strip	15	15	0	14	2	23	10	170	8.5	11
clear-cut strip	15	15	0	14	3	18	5	145	4.5	3
clear-cut strip	15	15	0	14	4	20	10	146	8	11	9
uncut strip	18	1	0	5	1	18	18	154	5	13	8.5	7.5
uncut strip	18	1	0	5	2	20	12	190	4	7
uncut strip	18	2	2	9	1	17	10	127	6.5	7	7
uncut strip	18	2	2	9	3	19	9	156	3	4	8
uncut strip	18	4	0	14	1	18	4.5	109	7.5	6.5
uncut strip	18	4	0	14	2	25	9	178	7	8	1.5
uncut strip	18	4	0	14	3	23	16	216	7.5	5
uncut strip	18	5	0	2	1	23	18	313	10	6	7.5
uncut strip	18	6	0	4	2	16	8.5	80	4.5	7
uncut strip	18	7	0	4	1	16	11	157	12	10
uncut strip	18	7	0	4	2	16	6	132	4
uncut strip	18	8	0	6	1	16	5	93	5
uncut strip	18	8	0	6	2	17	8	106	8.5	4
uncut strip	18	9	0	6	1	17	9	110	8
uncut strip	18	9	0	6	2	20	7	155	3.5	1.5
uncut strip	18	9	0	6	3	21	15	193	10	9	6.5
uncut strip	18	10	0	32	2	19	11	160	6
uncut strip	18	10	0	32	3	21	4	128	5
uncut strip	18	10	0	32	4	21	9	194	6	4.5	7
uncut strip	18	11	0	2	1	17	8	106	4.5	5
uncut strip	18	12	0	3	2	20	5	152	4.5
uncut strip	18	15	0	16	1	26	10	175	5.5
uncut strip	18	15	0	16	2	13	10	115	7	5
uncut strip	18	15	0	16	3	21	8.5	195	3.5
uncut strip	10	2	0	4	1	18	6	110	6.5
uncut strip	10	2	0	4	2	21	7	132	6
uncut strip	10	3	0	6	2	20	4	75	3	2.5
uncut strip	10	4	0	3	1	20	5	133	6	5.5
uncut strip	10	5	0	2	1	21	11	218	10	9
uncut strip	10	6	0	1	1	12	16	91	12	13	6
uncut strip	10	7	0	18	1	14	7	137	6
uncut strip	10	7	0	18	3	20	18	230	4	10
uncut strip	10	7	0	18	4	20	15	192	7	4	5	3
uncut strip	10	8	0	14	1	18	7	213	3
uncut strip	10	10	0	3	1	19	9	145	6
uncut strip	10	10	0	3	2	18	6.5	158	4
uncut strip	10	12	0	4	1	14	10	81	5.5	3
uncut strip	10	13	0	2	1	15	11	148	9	8	3
uncut strip	10	13	0	2	2	21	3.5	155	3.5
uncut strip	10	14	0	4	1	19	10	227	6
uncut strip	10	14	0	4	2	20	15	205	7.5	8
uncut strip	10	15	0	21	1	18	23	200	8	7.5
uncut strip	10	15	0	21	2	20	13	260	12	11	12	10	7	8
uncut strip	10	15	0	21	3	19	11	242	10	3
control area		3	0	6	1	19	24	260	19	16
control area		3	0	6	2	20	27	292	18	19	12
control area		4	1	3	1	13	6.5	95	3
control area		4	1	3	2	14	7	97	3.2
control area		5	0	12	1	17	11	120	8.5
control area		5	0	12	2	19	12	180	3
control area		5	0	12	3	19	18	176	13	13
control area		5	0	12	4	11	5	50	4	1
control area		6	0	3	2	15	7	107	6.5
control area		7	0	11	1	19	12	142	8
control area		7	0	11	2	14	6	105	2	3.5
control area		7	0	11	3	18	8	138	7
control area		8	0	7	1	20	10	220	7.5	1
control area		9	0	3	1	19	13	224	9.5
control area		10	0	3	1	18	8	10.5	2
control area		11	0	1	1	16	8	65	1	2
control area		12	0	3	1	19	15.5	168	10	3.5	7	10
control area		13	0	3	1	20	15	253	15	5	14
control area		14	0	7	1	21	7	147	2
control area		14	0	7	2	18	13	177	9	2
control area		15	0	6	1	20	11.5	155	5.5
control area		15	0	6	2	15	6	77	4

## Sheet: photosynthesis
Type	width	age	period	sapling type	sapling number	Photo	stomatal conductance	transpiration rate	Ci	VpdL	Area	StmRat	BLCond	Tair	Tleaf	TBlk	CO2R	CO2S	H2OR	H2OS	RH_R	RH_S	Flow	PARi	PARo	Press	CsMch	HsMch	StableF	Status
clear-cut strip	25	21	9:30-10:30	Large	c-25-1	4.56	0.0691	1.22	271	1.68	6	1	2.84	31.56	32.7	31.41	394.79	388.74	32.53	33.946	67.64	70.58	499.9	0	1202	96.85	290	21.4	0.7	111105
clear-cut strip	25	21	9:30-10:30	Large	c-25-1	4.53	0.0694	1.23	272	1.68	6	1	2.84	31.57	32.7	31.42	394.77	388.75	32.526	33.948	67.6	70.56	499.9	0	1197	96.85	290	21.4	0.7	111105
clear-cut strip	25	21	9:30-10:30	Large	c-25-1	4.57	0.0696	1.23	272	1.68	6	1	2.84	31.57	32.7	31.42	394.75	388.69	32.522	33.95	67.58	70.55	499.9	0	1191	96.85	290	21.4	0.7	111105
clear-cut strip	25	21	9:30-10:30	Large	c-25-1	4.54	0.0702	1.24	273	1.68	6	1	2.84	31.57	32.7	31.42	394.74	388.7	32.515	33.954	67.59	70.58	499.9	0	1185	96.85	290	21.4	0.7	111105
clear-cut strip	25	21	9:30-10:30	Large	c-25-1	4.47	0.07	1.24	275	1.68	6	1	2.84	31.58	32.71	31.42	394.69	388.74	32.512	33.95	67.55	70.53	499.9	0	1177	96.85	290	21.4	0.7	111105
clear-cut strip	25	13	9:30-10:30	Medium	c-25-2	5.49	0.0891	1.6	276	1.72	6	1	2.84	32.18	32.98	32	394.5	387.16	32.494	34.351	65.26	68.99	499.8	0	1189	96.86	290	21.4	0.7	111105
clear-cut strip	25	13	9:30-10:30	Medium	c-25-2	5.46	0.0891	1.6	277	1.72	6	1	2.84	32.18	32.97	32	394.45	387.15	32.499	34.355	65.26	68.99	499.8	0	1188	96.86	290	21.4	0.7	111105
clear-cut strip	25	13	9:30-10:30	Medium	c-25-2	5.42	0.0888	1.59	277	1.72	6	1	2.84	32.19	32.97	32.01	394.41	387.17	32.508	34.357	65.24	68.94	499.8	0	1185	96.86	290	21.4	0.7	111105
clear-cut strip	25	13	9:30-10:30	Medium	c-25-2	5.33	0.0889	1.59	279	1.71	6	1	2.84	32.2	32.97	32.01	394.34	387.19	32.517	34.365	65.21	68.92	499.8	0	1182	96.86	290	21.4	0.7	111105
clear-cut strip	25	13	9:30-10:30	Medium	c-25-2	5.31	0.088	1.58	278	1.72	6	1	2.84	32.21	32.97	32.02	394.23	387.12	32.534	34.364	65.2	68.86	499.8	0	1173	96.86	290	21.4	0.7	111105
clear-cut strip	25	11	9:30-10:30	Small	c-25-3	7.79	0.0969	1.93	248	1.91	6	1	2.84	32.43	33.47	32.24	400.95	390.69	31.617	33.854	62.58	67.01	499.8	0	1674	96.87	290	21.4	0.7	111105
clear-cut strip	25	11	9:30-10:30	Small	c-25-3	7.82	0.0972	1.93	248	1.91	6	1	2.84	32.44	33.46	32.24	400.93	390.64	31.616	33.859	62.58	67.02	499.8	0	1673	96.87	290	21.4	0.7	111105
clear-cut strip	25	11	9:30-10:30	Small	c-25-3	7.78	0.0972	1.93	248	1.91	6	1	2.84	32.44	33.46	32.24	400.91	390.66	31.619	33.861	62.58	67.02	499.8	0	1671	96.87	290	21.4	0.7	111105
clear-cut strip	25	11	9:30-10:30	Small	c-25-3	7.75	0.097	1.93	249	1.9	6	1	2.84	32.44	33.46	32.25	400.91	390.71	31.62	33.858	62.56	66.99	499.8	0	1670	96.87	290	21.4	0.7	111105
clear-cut strip	25	11	9:30-10:30	Small	c-25-3	7.65	0.0973	1.93	251	1.9	6	1	2.84	32.45	33.45	32.25	400.84	390.76	31.621	33.862	62.54	66.97	499.8	0	1670	96.87	290	21.4	0.7	111105
clear-cut strip	25	21	11:00-12:00	Large	c-25-1	5.74	0.0644	2.54	189	3.68	6	1	2.84	37.05	38.42	36.92	359.25	351.3	29.501	32.447	44.96	49.45	499.9	0	1813	96.37	4.73	0.512	0.3	111105
clear-cut strip	25	21	11:00-12:00	Large	c-25-1	5.71	0.0649	2.55	190	3.67	6	1	2.84	37.06	38.41	36.92	359.25	351.32	29.52	32.48	44.99	49.5	499.9	0	1810	96.37	4.73	0.512	0.3	111105
clear-cut strip	25	21	11:00-12:00	Large	c-25-1	5.75	0.0645	2.53	188	3.67	6	1	2.84	37.06	38.41	36.92	359.24	351.26	29.566	32.509	45.04	49.52	499.9	0	1806	96.37	4.73	0.512	0.3	111105
clear-cut strip	25	21	11:00-12:00	Large	c-25-1	5.81	0.0643	2.53	187	3.68	6	1	2.84	37.07	38.43	36.93	359.23	351.2	29.606	32.546	45.09	49.56	499.9	0	1803	96.37	4.73	0.512	0.3	111105
clear-cut strip	25	21	11:00-12:00	Large	c-25-1	6.02	0.0638	2.52	180	3.7	6	1	2.84	37.08	38.51	36.93	359.24	350.96	29.683	32.613	45.18	49.64	499.9	0	1803	96.37	4.73	0.512	0.3	111105
clear-cut strip	25	21	11:00-12:00	Large	c-25-1	4.54	0.0512	1.1	229	2.01	6	1	2.84	33.69	34.04	33.65	389.85	383.9	33.223	34.493	61.28	63.62	500	0	692	96.86	288	21.8	0.7	111105
clear-cut strip	25	21	11:00-12:00	Large	c-25-1	4.54	0.0512	1.1	229	2.01	6	1	2.84	33.69	34.04	33.65	389.85	383.9	33.223	34.493	61.28	63.62	500	0	692	96.86	288	21.8	0.7	111105
clear-cut strip	25	21	11:00-12:00	Large	c-25-1	4.33	0.051	1.09	235	2.01	6	1	2.84	33.7	34.04	33.65	389.68	383.99	33.239	34.502	61.29	63.62	500	0	695	96.86	288	21.8	0.7	111105
clear-cut strip	25	21	11:00-12:00	Large	c-25-1	4.01	0.051	1.09	245	2.01	6	1	2.84	33.7	34.04	33.65	389.46	384.14	33.257	34.518	61.31	63.64	500	0	699	96.86	288	21.8	0.7	111105
clear-cut strip	25	21	11:00-12:00	Large	c-25-1	3.82	0.0508	1.08	251	2.01	6	1	2.84	33.7	34.04	33.66	389.32	384.24	33.27	34.525	61.33	63.64	500	0	701	96.86	288	21.8	0.7	111105
clear-cut strip	25	13	11:00-12:00	Medium	c-25-2	1.83	0.0889	2.75	309	2.93	6	1	2.84	37.02	36.21	36.93	363.31	359.92	28.992	32.191	44.27	49.15	499.9	0	623	96.38	4.73	0.512	0.7	111105
clear-cut strip	25	13	11:00-12:00	Medium	c-25-2	1.83	0.0889	2.75	309	2.93	6	1	2.84	37.02	36.21	36.93	363.31	359.92	28.992	32.191	44.27	49.15	499.9	0	623	96.38	4.73	0.512	0.7	111105
clear-cut strip	25	13	11:00-12:00	Medium	c-25-2	1.25	0.089	2.76	320	2.94	6	1	2.84	37.02	36.21	36.93	363.29	360.6	28.986	32.194	44.26	49.16	499.9	0	627	96.38	4.73	0.512	0.7	111105
clear-cut strip	25	13	11:00-12:00	Medium	c-25-2	0.764	0.0889	2.76	329	2.94	6	1	2.84	37.02	36.22	36.93	363.3	361.19	28.985	32.188	44.26	49.15	499.9	0	634	96.38	4.73	0.512	0.7	111105
clear-cut strip	25	13	11:00-12:00	Medium	c-25-2	-0.287	0.0888	2.76	350	2.94	6	1	2.84	37.02	36.22	36.92	363.28	362.42	28.977	32.182	44.26	49.15	499.9	0	649	96.38	4.73	0.512	0.7	111105
clear-cut strip	25	13	11:00-12:00	Medium	c-25-2	3.42	0.0526	1.12	264	2	6	1	2.84	33.88	34.28	33.83	385.52	380.9	34.057	35.353	62.16	64.52	499.9	0	915	96.86	288	21.8	1	111105
clear-cut strip	25	13	11:00-12:00	Medium	c-25-2	3.42	0.0526	1.12	264	2	6	1	2.84	33.88	34.28	33.83	385.52	380.9	34.057	35.353	62.16	64.52	499.9	0	915	96.86	288	21.8	1	111105
clear-cut strip	25	13	11:00-12:00	Medium	c-25-2	3.4	0.0527	1.12	265	2	6	1	2.84	33.88	34.28	33.84	385.49	380.89	34.052	35.349	62.14	64.51	499.9	0	915	96.86	288	21.8	1	111105
clear-cut strip	25	13	11:00-12:00	Medium	c-25-2	3.38	0.0528	1.12	266	2	6	1	2.84	33.88	34.28	33.84	385.49	380.92	34.046	35.346	62.13	64.5	499.9	0	916	96.86	288	21.8	1	111105
clear-cut strip	25	13	11:00-12:00	Medium	c-25-2	3.28	0.0528	1.12	269	2	6	1	2.84	33.89	34.27	33.84	385.45	381	34.037	35.337	62.1	64.47	499.9	0	917	96.86	288	21.8	1	111105
clear-cut strip	25	11	11:00-12:00	Small	c-25-3	5.71	0.095	3.39	237	3.37	6	1	2.84	37.15	37.83	36.95	361.59	353.3	29.488	33.422	44.7	50.66	499.9	0	1592	96.38	4.73	0.512	1	111105
clear-cut strip	25	11	11:00-12:00	Small	c-25-3	5.82	0.0955	3.42	236	3.39	6	1	2.84	37.15	37.87	36.95	361.64	353.21	29.467	33.435	44.68	50.69	499.9	0	1604	96.38	4.73	0.512	1	111105
clear-cut strip	25	11	11:00-12:00	Small	c-25-3	5.82	0.0957	3.45	236	3.41	6	1	2.84	37.15	37.92	36.95	361.74	353.29	29.434	33.434	44.63	50.69	499.9	0	1610	96.38	4.73	0.512	1	111105
clear-cut strip	25	11	11:00-12:00	Small	c-25-3	5.69	0.0957	3.45	238	3.41	6	1	2.84	37.15	37.93	36.95	361.73	353.44	29.418	33.424	44.6	50.67	499.9	0	1606	96.38	4.73	0.512	0.7	111105
clear-cut strip	25	11	11:00-12:00	Small	c-25-3	5.64	0.0958	3.45	239	3.41	6	1	2.84	37.15	37.93	36.95	361.75	353.51	29.41	33.419	44.59	50.66	499.9	0	1605	96.38	4.73	0.512	0.7	111105
clear-cut strip	25	11	11:00-12:00	Small	c-25-3	4.03	0.0836	1.63	287	1.86	6	1	2.84	34.03	34.04	33.96	381.97	376.4	34.169	36.06	61.83	65.25	499.9	0	975	96.87	288	21.8	0.7	111105
clear-cut strip	25	11	11:00-12:00	Small	c-25-3	4	0.0836	1.64	287	1.86	6	1	2.84	34.04	34.04	33.96	381.86	376.31	34.171	36.062	61.82	65.24	499.9	0	975	96.87	288	21.8	0.7	111105
clear-cut strip	25	11	11:00-12:00	Small	c-25-3	3.95	0.0833	1.63	288	1.86	6	1	2.84	34.04	34.04	33.96	381.76	376.29	34.179	36.064	61.83	65.24	499.9	0	976	96.87	288	21.8	0.7	111105
clear-cut strip	25	11	11:00-12:00	Small	c-25-3	3.89	0.0831	1.63	289	1.86	6	1	2.84	34.04	34.04	33.97	381.66	376.26	34.182	36.062	61.84	65.24	499.9	0	976	96.87	288	21.8	0.7	111105
clear-cut strip	25	11	11:00-12:00	Small	c-25-3	3.86	0.0827	1.62	289	1.86	6	1	2.84	34.05	34.04	33.97	381.51	376.15	34.194	36.066	61.84	65.22	499.9	0	976	96.87	288	21.8	0.7	111105
clear-cut strip	25	21	13:00-14:00	Large	c-25-1	3.04	0.0571	1.55	267	2.54	6	1	2.84	34.19	34.74	34.13	371.83	367.5	29.583	31.381	52.76	55.97	499.9	0	1133	96.3	2.71	0.729	0.7	111105
clear-cut strip	25	21	13:00-14:00	Large	c-25-1	3.08	0.0573	1.55	266	2.54	6	1	2.84	34.19	34.74	34.14	371.66	367.27	29.594	31.4	52.77	55.99	499.9	0	1260	96.3	2.71	0.729	1	111105
clear-cut strip	25	21	13:00-14:00	Large	c-25-1	3.05	0.0574	1.55	267	2.54	6	1	2.84	34.19	34.74	34.14	371.46	367.11	29.604	31.41	52.78	56	499.9	0	1271	96.3	2.71	0.729	0.7	111105
clear-cut strip	25	21	13:00-14:00	Large	c-25-1	3.09	0.0573	1.55	265	2.54	6	1	2.84	34.2	34.74	34.14	371.21	366.81	29.615	31.418	52.8	56.01	499.9	0	1273	96.3	2.71	0.729	0.7	111105
clear-cut strip	25	21	13:00-14:00	Large	c-25-1	2.99	0.0568	1.54	267	2.54	6	1	2.84	34.2	34.76	34.14	370.73	366.46	29.649	31.44	52.84	56.03	499.9	0	1284	96.3	2.71	0.729	0.7	111105
clear-cut strip	25	21	13:00-14:00	Large	c-25-1	2.33	0.0778	1.3	322	1.59	6	1	2.84	32.7	32.49	32.71	383.73	380.34	32.743	34.252	63.78	66.72	499.9	0	407	96.79	288	21.8	0.7	111105
clear-cut strip	25	21	13:00-14:00	Large	c-25-1	2.39	0.0778	1.3	320	1.59	6	1	2.84	32.71	32.48	32.71	383.73	380.27	32.742	34.25	63.78	66.71	499.9	0	407	96.79	288	21.8	0.7	111105
clear-cut strip	25	21	13:00-14:00	Large	c-25-1	2.39	0.0782	1.31	321	1.59	6	1	2.84	32.71	32.48	32.71	383.73	380.27	32.735	34.252	63.76	66.71	499.9	0	407	96.79	288	21.8	0.7	111105
clear-cut strip	25	21	13:00-14:00	Large	c-25-1	2.48	0.0786	1.31	319	1.59	6	1	2.84	32.71	32.48	32.72	383.73	380.16	32.732	34.254	63.75	66.71	499.9	0	407	96.79	288	21.8	0.7	111105
clear-cut strip	25	21	13:00-14:00	Large	c-25-1	2.45	0.0783	1.31	319	1.59	6	1	2.84	32.71	32.48	32.72	383.69	380.16	32.731	34.248	63.74	66.7	499.9	0	406	96.79	288	21.8	0.7	111105
clear-cut strip	25	13	13:00-14:00	Medium	c-25-2	3.27	0.0776	2.05	280	2.5	6	1	2.84	34.52	34.84	34.43	367.26	362.45	29.816	32.199	52.22	56.39	499.9	0	1294	96.3	2.71	0.729	0.7	111105
clear-cut strip	25	13	13:00-14:00	Medium	c-25-2	3.36	0.0786	2.08	278	2.5	6	1	2.84	34.52	34.84	34.43	367.26	362.33	29.807	32.218	52.2	56.42	499.9	0	1293	96.3	2.71	0.729	1	111105
clear-cut strip	25	13	13:00-14:00	Medium	c-25-2	3.35	0.0792	2.09	279	2.5	6	1	2.84	34.52	34.84	34.43	367.24	362.3	29.802	32.23	52.19	56.44	499.9	0	1292	96.3	2.71	0.729	1	111105
clear-cut strip	25	13	13:00-14:00	Medium	c-25-2	3.36	0.0797	2.1	279	2.5	6	1	2.84	34.52	34.85	34.43	367.19	362.25	29.797	32.241	52.17	56.45	499.9	0	1292	96.3	2.71	0.729	1	111105
clear-cut strip	25	13	13:00-14:00	Medium	c-25-2	3.39	0.0816	2.15	280	2.5	6	1	2.84	34.53	34.86	34.44	367.14	362.13	29.776	32.278	52.12	56.5	499.9	0	1289	96.3	2.71	0.729	0.3	111105
clear-cut strip	25	13	13:00-14:00	Medium	c-25-2	1.28	0.0807	1.37	343	1.61	6	1	2.84	32.76	32.55	32.76	381.15	378.99	32.628	34.212	63.35	66.42	500	0	531	96.79	288	21.8	1	111105
clear-cut strip	25	13	13:00-14:00	Medium	c-25-2	1.28	0.0807	1.37	343	1.61	6	1	2.84	32.76	32.55	32.76	381.15	378.99	32.628	34.212	63.35	66.42	500	0	531	96.79	288	21.8	1	111105
clear-cut strip	25	13	13:00-14:00	Medium	c-25-2	1.27	0.0806	1.36	343	1.61	6	1	2.84	32.77	32.55	32.76	381.11	378.97	32.633	34.214	63.35	66.42	500	0	531	96.79	288	21.8	1	111105
clear-cut strip	25	13	13:00-14:00	Medium	c-25-2	1.3	0.0809	1.37	342	1.61	6	1	2.84	32.77	32.55	32.76	381.07	378.89	32.631	34.218	63.34	66.42	500.1	0	531	96.79	288	21.8	1	111105
clear-cut strip	25	13	13:00-14:00	Medium	c-25-2	1.27	0.0811	1.37	343	1.61	6	1	2.84	32.77	32.55	32.77	380.97	378.82	32.631	34.222	63.35	66.43	500	0	529	96.79	288	21.8	1	111105
clear-cut strip	25	11	13:00-14:00	Small	c-25-3	3.53	0.0884	2.39	278	2.56	6	1	2.84	34.69	35.19	34.6	362.61	357.35	29.881	32.658	51.84	56.66	499.9	0	1512	96.3	2.71	0.729	0.7	111105
clear-cut strip	25	11	13:00-14:00	Small	c-25-3	3.61	0.0891	2.41	277	2.56	6	1	2.84	34.69	35.2	34.61	362.59	357.22	29.875	32.674	51.82	56.68	499.9	0	1514	96.3	2.71	0.729	0.7	111105
clear-cut strip	25	11	13:00-14:00	Small	c-25-3	3.57	0.0892	2.42	277	2.57	6	1	2.84	34.69	35.2	34.61	362.58	357.25	29.87	32.674	51.81	56.67	499.9	0	1516	96.3	2.71	0.729	0.7	111105
clear-cut strip	25	11	13:00-14:00	Small	c-25-3	3.62	0.0894	2.42	277	2.57	6	1	2.84	34.69	35.21	34.61	362.54	357.15	29.868	32.681	51.8	56.68	499.9	0	1518	96.3	2.71	0.729	0.7	111105
clear-cut strip	25	11	13:00-14:00	Small	c-25-3	3.67	0.0897	2.43	276	2.57	6	1	2.84	34.69	35.21	34.61	362.54	357.09	29.866	32.688	51.79	56.69	499.9	0	1519	96.3	2.71	0.729	0.7	111105
clear-cut strip	25	11	13:00-14:00	Small	c-25-3	1.72	0.0818	1.36	337	1.59	6	1	2.84	32.69	32.54	32.71	383.46	380.77	32.851	34.432	64.03	67.11	499.8	0	539	96.79	288	21.8	0.7	111105
clear-cut strip	25	11	13:00-14:00	Small	c-25-3	1.75	0.0813	1.36	336	1.59	6	1	2.84	32.69	32.54	32.71	383.43	380.71	32.85	34.422	64.02	67.09	499.8	0	539	96.79	288	21.8	0.7	111105
clear-cut strip	25	11	13:00-14:00	Small	c-25-3	1.77	0.0814	1.36	335	1.59	6	1	2.84	32.69	32.54	32.71	383.42	380.68	32.846	34.421	64.02	67.09	499.8	0	539	96.79	288	21.8	0.7	111105
clear-cut strip	25	11	13:00-14:00	Small	c-25-3	1.69	0.0809	1.35	337	1.59	6	1	2.84	32.7	32.54	32.71	383.4	380.75	32.844	34.41	64.01	67.06	499.8	0	539	96.79	288	21.8	0.7	111105
clear-cut strip	25	11	13:00-14:00	Small	c-25-3	1.6	0.0805	1.35	338	1.59	6	1	2.84	32.7	32.54	32.71	383.37	380.83	32.841	34.4	64	67.04	499.8	0	539	96.79	288	21.8	0.7	111105
clear-cut strip	25	21	14:30-15:30	Large	c-25-1	7.37	0.091	245	2.14	2.23	6	1	2.84	34.02	34.33	34.02	399.86	390.01	30.837	33.32	55.52	59.99	499.9	0	890	96.29	47.1	-0.0292	0.7	111105
clear-cut strip	25	21	14:30-15:30	Large	c-25-1	7.35	0.0911	245	2.14	2.23	6	1	2.84	34.02	34.32	34.02	399.85	390.03	30.835	33.321	55.51	59.98	499.9	0	888	96.29	47.1	-0.0292	0.7	111105
clear-cut strip	25	21	14:30-15:30	Large	c-25-1	7.34	0.0913	246	2.14	2.23	6	1	2.84	34.02	34.32	34.02	399.88	390.07	30.835	33.323	55.5	59.98	499.9	0	887	96.29	47.1	-0.0292	0.7	111105
clear-cut strip	25	21	14:30-15:30	Large	c-25-1	7.27	0.0915	247	2.15	2.23	6	1	2.84	34.02	34.31	34.02	399.9	390.17	30.834	33.324	55.5	59.98	499.9	0	886	96.29	47.1	-0.0292	0.7	111105
clear-cut strip	25	21	14:30-15:30	Large	c-25-1	7.15	0.0921	250	2.16	2.22	6	1	2.84	34.02	34.29	34.02	399.87	390.27	30.835	33.335	55.49	59.99	500	0	882	96.29	47.1	-0.0292	0.7	111105
clear-cut strip	25	21	14:30-15:30	Large	c-25-1	2.27	0.0596	311	0.822	1.31	6	1	2.84	30.8	30.49	30.82	383.68	380.58	30.775	31.731	66.77	68.84	499.9	0	254	96.79	286	21	0.7	111105
clear-cut strip	25	21	14:30-15:30	Large	c-25-1	2.28	0.06	311	0.828	1.31	6	1	2.84	30.81	30.49	30.82	383.67	380.56	30.775	31.737	66.76	68.85	499.9	0	254	96.79	286	21	0.7	111105
clear-cut strip	25	21	14:30-15:30	Large	c-25-1	2.29	0.0602	311	0.83	1.31	6	1	2.84	30.81	30.49	30.82	383.72	380.59	30.775	31.74	66.76	68.86	499.9	0	254	96.79	286	21	0.7	111105
clear-cut strip	25	21	14:30-15:30	Large	c-25-1	2.24	0.0603	312	0.833	1.31	6	1	2.84	30.81	30.5	30.82	383.69	380.63	30.771	31.739	66.75	68.85	499.9	0	254	96.79	286	21	0.7	111105
clear-cut strip	25	21	14:30-15:30	Large	c-25-1	2.17	0.0607	315	0.839	1.31	6	1	2.84	30.81	30.51	30.82	383.71	380.71	30.766	31.741	66.73	68.85	499.9	0	253	96.79	286	21	0.7	111105
clear-cut strip	25	13	14:30-15:30	Medium	c-25-2	5.64	0.181	324	3.56	1.92	6	1	2.84	34.18	33.84	34.16	396.92	388.49	30.871	34.99	55.08	62.43	500	0	806	96.29	47.1	-0.0292	0.7	111105
clear-cut strip	25	13	14:30-15:30	Medium	c-25-2	5.72	0.181	323	3.56	1.93	6	1	2.84	34.18	33.84	34.16	396.88	388.36	30.869	34.99	55.07	62.43	500	0	806	96.29	47.1	-0.0292	0.7	111105
clear-cut strip	25	13	14:30-15:30	Medium	c-25-2	5.67	0.18	323	3.55	1.93	6	1	2.84	34.18	33.85	34.16	396.81	388.35	30.865	34.976	55.06	62.4	500	0	805	96.29	47.1	-0.0292	0.7	111105
clear-cut strip	25	13	14:30-15:30	Medium	c-25-2	5.68	0.18	323	3.55	1.93	6	1	2.84	34.18	33.85	34.16	396.75	388.28	30.862	34.975	55.05	62.39	500	0	803	96.29	47.1	-0.0292	0.7	111105
clear-cut strip	25	13	14:30-15:30	Medium	c-25-2	5.71	0.18	323	3.55	1.93	6	1	2.84	34.18	33.86	34.16	396.7	388.19	30.861	34.974	55.05	62.38	500	0	801	96.29	47.1	-0.0292	0.7	111105
clear-cut strip	25	13	14:30-15:30	Medium	c-25-2	0.918	0.0664	351	0.952	1.36	6	1	2.84	30.75	30.77	30.78	383.6	382.07	30.812	31.918	67.05	69.45	499.8	0	277	96.78	286	21	0.7	111105
clear-cut strip	25	13	14:30-15:30	Medium	c-25-2	0.918	0.0664	351	0.952	1.36	6	1	2.84	30.75	30.77	30.78	383.6	382.07	30.812	31.918	67.05	69.45	499.8	0	277	96.78	286	21	0.7	111105
clear-cut strip	25	13	14:30-15:30	Medium	c-25-2	0.875	0.0666	352	0.953	1.36	6	1	2.84	30.75	30.76	30.78	383.56	382.07	30.81	31.917	67.04	69.45	499.8	0	277	96.78	286	21	0.7	111105
clear-cut strip	25	13	14:30-15:30	Medium	c-25-2	0.829	0.0671	353	0.957	1.36	6	1	2.84	30.75	30.75	30.78	383.52	382.09	30.811	31.923	67.04	69.46	499.9	0	277	96.78	286	21	0.7	111105
clear-cut strip	25	13	14:30-15:30	Medium	c-25-2	0.884	0.0675	352	0.958	1.35	6	1	2.84	30.76	30.73	30.78	383.56	382.06	30.812	31.926	67.03	69.46	499.9	0	276	96.78	286	21	0.7	111105
clear-cut strip	25	11	14:30-15:30	Small	c-25-3	2.29	0.0589	310	0.76	1.23	6	1	2.84	30.69	30.27	30.73	384.04	380.94	31.167	32.05	68.05	69.98	499.9	0	328	96.78	286	21	0.7	111105
clear-cut strip	25	11	14:30-15:30	Small	c-25-3	2.2	0.0592	313	0.764	1.23	6	1	2.84	30.69	30.27	30.73	384.02	381.02	31.167	32.054	68.05	69.99	499.9	0	328	96.78	286	21	1	111105
clear-cut strip	25	11	14:30-15:30	Small	c-25-3	2.17	0.0591	314	0.763	1.23	6	1	2.84	30.69	30.27	30.73	384.01	381.06	31.165	32.051	68.05	69.98	499.8	0	328	96.78	286	21	1	111105
clear-cut strip	25	11	14:30-15:30	Small	c-25-3	2.23	0.0593	312	0.766	1.23	6	1	2.84	30.69	30.27	30.73	384.03	381	31.162	32.052	68.04	69.98	499.8	0	328	96.78	286	21	1	111105
clear-cut strip	25	11	14:30-15:30	Small	c-25-3	2.26	0.0591	311	0.763	1.23	6	1	2.84	30.69	30.28	30.73	384.07	381.01	31.16	32.047	68.03	69.97	499.8	0	329	96.78	286	21	1	111105
clear-cut strip	25	11	14:30-15:30	Small	c-25-3	6.89	0.142	289	3	2.04	6	1	2.84	34.14	33.97	34.16	391.01	381.36	30.787	34.267	55.07	61.29	499.9	0	782	96.29	47.1	-0.0292	0.3	111105
clear-cut strip	25	11	14:30-15:30	Small	c-25-3	6.84	0.143	290	3.01	2.03	6	1	2.84	34.14	33.95	34.16	391	381.41	30.789	34.276	55.07	61.3	499.9	0	736	96.29	47.1	-0.0292	0.3	111105
clear-cut strip	25	11	14:30-15:30	Small	c-25-3	6.93	0.144	289	3.01	2.02	6	1	2.84	34.14	33.92	34.16	390.96	381.27	30.797	34.287	55.07	61.31	499.9	0	732	96.29	47.1	-0.0292	0.3	111105
clear-cut strip	25	11	14:30-15:30	Small	c-25-3	6.93	0.144	289	3.01	2.02	6	1	2.84	34.14	33.91	34.16	390.93	381.23	30.8	34.288	55.07	61.3	499.9	0	732	96.29	47.1	-0.0292	0.3	111105
clear-cut strip	25	11	14:30-15:30	Small	c-25-3	6.87	0.145	290	3.02	2.01	6	1	2.84	34.15	33.92	34.17	390.78	381.16	30.812	34.309	55.07	61.32	499.9	0	826	96.29	47.1	-0.0292	0.7	111105
clear-cut strip	20	15	11:00-12:00	Medium	c-20-2	4.26	0.0743	3.26	247	4.12	6	1	2.84	39	39.34	38.89	369.63	363.1	27.701	31.494	38.01	43.22	499.9	0	1484	96.42	4.12	0.4	1	111105
clear-cut strip	20	15	11:00-12:00	Medium	c-20-2	4.34	0.032	0.802	158	2.34	6	1	2.84	34.94	34.74	34.87	394.16	388.58	32.339	33.27	55.67	57.27	499.9	0	828	96.9	290	20.4	0.7	111105
clear-cut strip	20	15	11:00-12:00	Medium	c-20-2	4.34	0.032	0.802	158	2.34	6	1	2.84	34.94	34.74	34.87	394.16	388.58	32.339	33.27	55.67	57.27	499.9	0	828	96.9	290	20.4	0.7	111105
clear-cut strip	20	15	11:00-12:00	Medium	c-20-2	4.33	0.0318	0.797	158	2.34	6	1	2.84	34.94	34.74	34.87	394.2	388.63	32.338	33.263	55.66	57.25	499.9	0	829	96.9	290	20.4	0.7	111105
clear-cut strip	20	15	11:00-12:00	Medium	c-20-2	4.34	0.0322	0.807	160	2.34	6	1	2.84	34.94	34.74	34.87	394.24	388.65	32.332	33.268	55.65	57.26	499.9	0	830	96.9	290	20.4	0.7	111105
clear-cut strip	20	15	11:00-12:00	Medium	c-20-2	4.36	0.0323	0.808	159	2.34	6	1	2.84	34.94	34.74	34.88	394.23	388.62	32.334	33.272	55.65	57.27	499.8	0	835	96.9	290	20.4	0.7	111105
clear-cut strip	20	15	11:00-12:00	Medium	c-20-2	4.14	0.0742	3.26	250	4.12	6	1	2.84	39	39.34	38.89	369.65	363.25	27.705	31.499	38.02	43.23	499.9	0	1472	96.42	4.12	0.4	1	111105
clear-cut strip	20	14	11:00-12:00	Small	c-20-3	4.11	0.00903	0.27	-342	2.77	6	1	2.84	35.03	35.9	34.96	393.88	388.82	32.331	32.645	55.36	55.9	499.9	0	1081	96.9	290	20.4	1	111105
clear-cut strip	20	14	11:00-12:00	Small	c-20-3	4.11	0.00903	0.27	-342	2.77	6	1	2.84	35.03	35.9	34.96	393.88	388.82	32.331	32.645	55.36	55.9	499.9	0	1081	96.9	290	20.4	1	111105
clear-cut strip	20	14	11:00-12:00	Small	c-20-3	4.07	0.00868	0.26	-364	2.77	6	1	2.84	35.04	35.9	34.96	393.87	388.86	32.337	32.638	55.37	55.88	499.9	0	1078	96.9	290	20.4	1	111105
clear-cut strip	20	14	11:00-12:00	Small	c-20-3	4.07	0.00845	0.253	-384	2.77	6	1	2.84	35.04	35.9	34.96	393.88	388.88	32.345	32.639	55.38	55.88	500	0	1076	96.9	290	20.4	1	111105
clear-cut strip	20	14	11:00-12:00	Small	c-20-3	4.1	0.00851	0.255	-384	2.77	6	1	2.84	35.04	35.9	34.97	393.87	388.84	32.349	32.645	55.37	55.88	500.1	0	1071	96.9	290	20.4	1	111105
clear-cut strip	20	14	11:00-12:00	Small	c-20-3	5.37	0.0764	3.48	225	4.26	6	1	2.84	39.26	40.01	39.18	369.61	361.66	28.68	32.719	38.8	44.26	499.9	0	1518	96.42	4.12	0.4	0.7	111105
clear-cut strip	20	14	11:00-12:00	Small	c-20-3	5.37	0.0764	3.48	225	4.26	6	1	2.84	39.26	40.01	39.18	369.61	361.66	28.68	32.719	38.8	44.26	499.9	0	1518	96.42	4.12	0.4	0.7	111105
clear-cut strip	20	14	11:00-12:00	Small	c-20-3	5.32	0.0765	3.49	226	4.27	6	1	2.84	39.26	40.02	39.19	369.58	361.68	28.687	32.733	38.81	44.28	499.9	0	1508	96.42	4.12	0.4	0.7	111105
clear-cut strip	20	14	11:00-12:00	Small	c-20-3	5.35	0.0764	3.49	225	4.27	6	1	2.84	39.26	40.03	39.19	369.54	361.6	28.693	32.742	38.82	44.29	499.9	0	1499	96.42	4.12	0.4	0.7	111105
clear-cut strip	20	14	11:00-12:00	Small	c-20-3	5.28	0.0765	3.49	227	4.27	6	1	2.84	39.27	40.05	39.19	369.45	361.59	28.702	32.757	38.83	44.31	499.9	0	1487	96.42	4.12	0.4	0.7	111105
clear-cut strip	20	25	13:00-14:00	Large	c-20-1	4.06	0.0831	2.18	268	2.48	6	1	2.84	33.43	34.56	33.24	366.93	361.12	28.912	31.443	53.83	58.54	499.9	0	1599	96.35	3.78	0.765	0.3	111105
clear-cut strip	20	25	13:00-14:00	Large	c-20-1	4	0.0831	2.18	269	2.49	6	1	2.84	33.43	34.57	33.25	366.9	361.15	28.898	31.433	53.79	58.51	499.9	0	1598	96.35	3.78	0.765	0.3	111105
clear-cut strip	20	25	13:00-14:00	Large	c-20-1	3.96	0.0826	2.18	269	2.5	6	1	2.84	33.44	34.59	33.25	366.84	361.14	28.864	31.393	53.71	58.42	499.9	0	1598	96.35	3.78	0.765	0.3	111105
clear-cut strip	20	25	13:00-14:00	Large	c-20-1	3.94	0.0822	2.17	269	2.5	6	1	2.84	33.44	34.6	33.25	366.83	361.17	28.852	31.374	53.68	58.38	499.9	0	1598	96.35	3.78	0.765	0.3	111105
clear-cut strip	20	25	13:00-14:00	Large	c-20-1	4.01	0.0821	2.17	267	2.5	6	1	2.84	33.44	34.6	33.26	366.81	361.05	28.842	31.363	53.66	58.35	499.9	0	1598	96.35	3.78	0.765	0.3	111105
clear-cut strip	20	25	13:00-14:00	Large	c-20-1	1.02	0.0272	0.731	311	2.5	6	1	2.84	35.62	35.4	35.65	388.77	387.2	32.925	33.772	54.54	55.94	499.9	0	550	96.84	290	21.7	0.7	111105
clear-cut strip	20	25	13:00-14:00	Large	c-20-1	1.02	0.0272	0.731	311	2.5	6	1	2.84	35.62	35.4	35.65	388.77	387.2	32.925	33.772	54.54	55.94	499.9	0	550	96.84	290	21.7	0.7	111105
clear-cut strip	20	25	13:00-14:00	Large	c-20-1	1.09	0.0273	0.732	308	2.5	6	1	2.84	35.62	35.4	35.65	388.76	387.11	32.922	33.771	54.53	55.94	499.9	0	547	96.84	290	21.7	0.7	111105
clear-cut strip	20	25	13:00-14:00	Large	c-20-1	1.11	0.0275	0.739	307	2.51	6	1	2.84	35.62	35.41	35.65	388.73	387.05	32.919	33.776	54.54	55.96	500	0	547	96.84	290	21.7	0.7	111105
clear-cut strip	20	25	13:00-14:00	Large	c-20-1	1.13	0.0275	0.74	306	2.51	6	1	2.84	35.62	35.41	35.65	388.71	387.01	32.917	33.776	54.54	55.96	500	0	551	96.84	290	21.7	0.7	111105
clear-cut strip	20	15	13:00-14:00	Medium	c-20-2	3.96	0.0681	1.93	250	2.68	6	1	2.84	33.66	34.77	33.49	364.51	358.93	27.863	30.112	51.2	55.34	499.9	0	1251	96.35	3.78	0.765	1	111105
clear-cut strip	20	15	13:00-14:00	Medium	c-20-2	3.99	0.0679	1.93	249	2.68	6	1	2.84	33.67	34.77	33.49	364.53	358.92	27.867	30.11	51.2	55.32	499.9	0	1250	96.35	3.78	0.765	1	111105
clear-cut strip	20	15	13:00-14:00	Medium	c-20-2	3.97	0.0673	1.91	248	2.68	6	1	2.84	33.67	34.78	33.5	364.49	358.9	27.867	30.094	51.19	55.28	499.9	0	1248	96.35	3.78	0.765	1	111105
clear-cut strip	20	15	13:00-14:00	Medium	c-20-2	4.09	0.0673	1.91	245	2.68	6	1	2.84	33.67	34.79	33.5	364.5	358.76	27.872	30.101	51.19	55.29	499.9	0	1244	96.35	3.78	0.765	1	111105
clear-cut strip	20	15	13:00-14:00	Medium	c-20-2	4.1	0.0664	1.89	244	2.69	6	1	2.84	33.68	34.8	33.5	364.51	358.77	27.881	30.084	51.2	55.24	499.9	0	1242	96.35	3.78	0.765	1	111105
clear-cut strip	20	15	13:00-14:00	Medium	c-20-2	1.43	0.0432	1.13	317	2.45	6	1	2.84	35.36	35.12	35.39	387.99	385.75	32.118	33.428	53.99	56.19	499.9	0	549	96.84	290	21.7	0.7	111105
clear-cut strip	20	15	13:00-14:00	Medium	c-20-2	1.42	0.0433	1.13	318	2.45	6	1	2.84	35.36	35.12	35.39	387.96	385.73	32.117	33.43	53.99	56.19	499.9	0	549	96.84	290	21.7	0.7	111105
clear-cut strip	20	15	13:00-14:00	Medium	c-20-2	1.43	0.0435	1.14	318	2.45	6	1	2.84	35.36	35.12	35.39	387.95	385.71	32.117	33.435	53.99	56.21	499.9	0	549	96.84	290	21.7	0.7	111105
clear-cut strip	20	15	13:00-14:00	Medium	c-20-2	1.43	0.0435	1.14	318	2.45	6	1	2.84	35.36	35.12	35.39	387.9	385.66	32.115	33.434	53.98	56.2	499.9	0	549	96.84	290	21.7	0.7	111105
clear-cut strip	20	15	13:00-14:00	Medium	c-20-2	1.5	0.0435	1.13	315	2.45	6	1	2.84	35.36	35.11	35.39	387.92	385.6	32.118	33.435	53.99	56.21	499.9	0	549	96.84	290	21.7	0.7	111105
clear-cut strip	20	14	13:00-14:00	Small	c-20-3	4.02	0.0857	2.44	266	2.7	6	1	2.84	34.08	35.01	33.85	363.61	357.73	27.795	30.635	49.91	55.01	499.9	0	1273	96.36	3.78	0.765	0.7	111105
clear-cut strip	20	14	13:00-14:00	Small	c-20-3	3.99	0.0856	2.44	267	2.71	6	1	2.84	34.08	35.03	33.86	363.6	357.76	27.803	30.645	49.9	55.01	499.9	0	1275	96.36	3.78	0.765	0.7	111105
clear-cut strip	20	14	13:00-14:00	Small	c-20-3	4.08	0.0848	2.42	264	2.71	6	1	2.84	34.1	35.04	33.87	363.63	357.7	27.815	30.634	49.89	54.95	499.9	0	1276	96.36	3.78	0.765	1	111105
clear-cut strip	20	14	13:00-14:00	Small	c-20-3	4.13	0.0843	2.41	263	2.71	6	1	2.84	34.1	35.03	33.87	363.66	357.67	27.832	30.633	49.9	54.92	499.9	0	1272	96.36	3.78	0.765	1	111105
clear-cut strip	20	14	13:00-14:00	Small	c-20-3	4.16	0.0837	2.39	262	2.7	6	1	2.84	34.13	35.01	33.88	363.71	357.7	27.856	30.631	49.88	54.85	499.9	0	1274	96.36	3.78	0.765	1	111105
clear-cut strip	20	14	13:00-14:00	Small	c-20-3	1.92	0.047	1.2	306	2.4	6	1	2.84	35.39	35.12	35.4	390	387.14	32.491	33.885	54.51	56.85	499.9	0	485	96.85	290	21.7	0.7	111105
clear-cut strip	20	14	13:00-14:00	Small	c-20-3	1.92	0.047	1.2	306	2.4	6	1	2.84	35.39	35.12	35.4	390	387.14	32.491	33.885	54.51	56.85	499.9	0	485	96.85	290	21.7	0.7	111105
clear-cut strip	20	14	13:00-14:00	Small	c-20-3	1.94	0.047	1.2	306	2.4	6	1	2.84	35.39	35.12	35.4	390.01	387.12	32.508	33.901	54.54	56.88	499.9	0	486	96.85	290	21.7	0.7	111105
clear-cut strip	20	14	13:00-14:00	Small	c-20-3	1.92	0.0469	1.2	306	2.4	6	1	2.84	35.39	35.12	35.4	389.97	387.11	32.513	33.903	54.55	56.88	499.9	0	486	96.85	290	21.7	1	111105
clear-cut strip	20	14	13:00-14:00	Small	c-20-3	1.93	0.0468	1.2	306	2.4	6	1	2.84	35.39	35.11	35.4	389.98	387.1	32.521	33.909	54.56	56.89	499.9	0	487	96.85	290	21.7	1	111105
clear-cut strip	20	25	14:30-15:30	Large	c-20-1	1.91	0.161	2.31	348	1.4	6	1	2.84	31.99	30.97	31.98	379.62	376.29	29.521	32.207	59.58	65.01	499.9	0	260	96.32	47.1	-0.0292	0.7	111105
clear-cut strip	20	25	14:30-15:30	Large	c-20-1	1.91	0.161	2.31	348	1.4	6	1	2.84	31.99	30.97	31.98	379.62	376.29	29.521	32.207	59.58	65.01	499.9	0	260	96.32	47.1	-0.0292	0.7	111105
clear-cut strip	20	25	14:30-15:30	Large	c-20-1	1.87	0.161	2.31	348	1.4	6	1	2.84	31.99	30.98	31.98	379.6	376.31	29.521	32.21	59.6	65.03	499.9	0	261	96.32	47.1	-0.0292	0.7	111105
clear-cut strip	20	25	14:30-15:30	Large	c-20-1	1.88	0.161	2.31	348	1.4	6	1	2.84	31.99	30.98	31.98	379.57	376.27	29.521	32.209	59.59	65.02	499.9	0	260	96.32	47.1	-0.0292	0.7	111105
clear-cut strip	20	25	14:30-15:30	Large	c-20-1	1.89	0.161	2.31	348	1.4	6	1	2.84	31.99	30.98	31.98	379.56	376.24	29.518	32.199	59.57	64.98	499.9	0	258	96.32	47.1	-0.0292	0.7	111105
clear-cut strip	20	25	14:30-15:30	Large	c-20-1	0.236	0.0499	0.784	368	1.49	6	1	2.84	31.68	31.38	31.71	385.57	384.92	31.352	32.263	64.7	66.58	499.9	0	229	96.78	287	21.4	0.7	111105
clear-cut strip	20	25	14:30-15:30	Large	c-20-1	0.17	0.0499	0.784	370	1.49	6	1	2.84	31.68	31.38	31.71	385.56	384.99	31.353	32.265	64.69	66.57	499.9	0	227	96.78	287	21.4	0.7	111105
clear-cut strip	20	25	14:30-15:30	Large	c-20-1	0.234	0.0501	0.788	368	1.49	6	1	2.84	31.69	31.38	31.71	385.54	384.9	31.352	32.268	64.68	66.57	499.9	0	227	96.78	287	21.4	0.7	111105
clear-cut strip	20	25	14:30-15:30	Large	c-20-1	0.239	0.0501	0.787	368	1.49	6	1	2.84	31.69	31.38	31.71	385.55	384.9	31.354	32.269	64.68	66.57	499.9	0	226	96.78	287	21.4	0.7	111105
clear-cut strip	20	25	14:30-15:30	Large	c-20-1	0.228	0.0503	0.792	368	1.49	6	1	2.84	31.69	31.38	31.71	385.48	384.84	31.354	32.273	64.67	66.57	499.9	0	224	96.78	287	21.4	0.7	111105
clear-cut strip	20	15	14:30-15:30	Medium	c-20-2	2.8	0.129	1.88	333	1.41	6	1	2.84	31.91	31	31.92	382.38	378.17	30.005	32.189	60.83	65.26	499.9	0	269	96.33	47.1	-0.0292	1	111105
clear-cut strip	20	15	14:30-15:30	Medium	c-20-2	2.78	0.13	1.89	334	1.41	6	1	2.84	31.91	30.99	31.92	382.4	378.2	30.001	32.196	60.83	65.28	499.9	0	267	96.33	47.1	-0.0292	1	111105
clear-cut strip	20	15	14:30-15:30	Medium	c-20-2	2.87	0.13	1.89	333	1.41	6	1	2.84	31.91	30.99	31.92	382.44	378.14	29.996	32.189	60.82	65.26	499.9	0	265	96.33	47.1	-0.0292	1	111105
clear-cut strip	20	15	14:30-15:30	Medium	c-20-2	2.92	0.13	1.89	332	1.4	6	1	2.84	31.91	30.98	31.92	382.49	378.13	29.99	32.188	60.81	65.27	499.9	0	263	96.33	47.1	-0.0292	1	111105
clear-cut strip	20	15	14:30-15:30	Medium	c-20-2	2.97	0.131	1.9	332	1.4	6	1	2.84	31.92	30.97	31.92	382.55	378.12	29.981	32.184	60.77	65.23	499.9	0	262	96.33	47.1	-0.0292	0.7	111105
clear-cut strip	20	15	14:30-15:30	Medium	c-20-2	1.1	0.0559	0.897	340	1.52	6	1	2.84	31.75	31.6	31.78	383.57	381.84	31.472	32.514	64.68	66.83	499.9	0	341	96.78	287	21.4	0.7	111105
clear-cut strip	20	15	14:30-15:30	Medium	c-20-2	1.02	0.0555	0.891	343	1.52	6	1	2.84	31.75	31.6	31.78	383.56	381.92	31.474	32.509	64.69	66.81	499.9	0	341	96.78	287	21.4	0.7	111105
clear-cut strip	20	15	14:30-15:30	Medium	c-20-2	1.02	0.0549	0.881	342	1.52	6	1	2.84	31.76	31.59	31.78	383.52	381.88	31.483	32.506	64.7	66.8	499.9	0	341	96.78	287	21.4	0.7	111105
clear-cut strip	20	15	14:30-15:30	Medium	c-20-2	1.04	0.0546	0.876	342	1.52	6	1	2.84	31.76	31.59	31.78	383.5	381.86	31.49	32.508	64.71	66.8	499.9	0	341	96.78	287	21.4	0.7	111105
clear-cut strip	20	15	14:30-15:30	Medium	c-20-2	1.02	0.0543	0.872	342	1.52	6	1	2.84	31.76	31.59	31.78	383.51	381.89	31.491	32.505	64.71	66.79	499.8	0	341	96.78	287	21.4	0.7	111105
clear-cut strip	20	14	14:30-15:30	Small	c-20-3	0.848	0.0627	0.957	352	1.45	6	1	2.84	31.83	31.44	31.82	385.01	383.55	31.707	32.817	64.89	67.16	499.9	0	258	96.78	287	21.4	0.7	111105
clear-cut strip	20	14	14:30-15:30	Small	c-20-3	0.848	0.0627	0.957	352	1.45	6	1	2.84	31.83	31.44	31.82	385.01	383.55	31.707	32.817	64.89	67.16	499.9	0	258	96.78	287	21.4	0.7	111105
clear-cut strip	20	14	14:30-15:30	Small	c-20-3	0.911	0.0624	0.952	351	1.45	6	1	2.84	31.83	31.43	31.82	385.03	383.5	31.709	32.814	64.88	67.14	499.9	0	258	96.78	287	21.4	0.7	111105
clear-cut strip	20	14	14:30-15:30	Small	c-20-3	0.919	0.0627	0.954	350	1.45	6	1	2.84	31.84	31.42	31.82	385.03	383.48	31.711	32.818	64.87	67.13	499.9	0	258	96.78	287	21.4	0.7	111105
clear-cut strip	20	14	14:30-15:30	Small	c-20-3	0.884	0.0621	0.946	351	1.45	6	1	2.84	31.85	31.42	31.83	384.99	383.49	31.712	32.81	64.84	67.08	499.8	0	257	96.78	287	21.4	0.7	111105
clear-cut strip	20	14	14:30-15:30	Small	c-20-3	2.79	0.121	1.95	328	1.55	6	1	2.84	31.97	31.54	31.98	379.95	375.72	29.92	32.182	60.47	65.04	499.9	0	365	96.33	47.1	-0.0292	0.7	111105
clear-cut strip	20	14	14:30-15:30	Small	c-20-3	2.73	0.121	1.95	329	1.55	6	1	2.84	31.97	31.54	31.98	379.99	375.83	29.93	32.197	60.48	65.06	499.9	0	365	96.33	47.1	-0.0292	0.7	111105
clear-cut strip	20	14	14:30-15:30	Small	c-20-3	2.69	0.122	1.96	330	1.55	6	1	2.84	31.97	31.54	31.98	379.98	375.87	29.938	32.216	60.51	65.11	499.9	0	364	96.33	47.1	-0.0292	0.7	111105
clear-cut strip	20	14	14:30-15:30	Small	c-20-3	2.73	0.122	1.96	329	1.55	6	1	2.84	31.97	31.54	31.98	380	375.83	29.946	32.227	60.51	65.12	499.9	0	363	96.33	47.1	-0.0292	0.7	111105
clear-cut strip	20	14	14:30-15:30	Small	c-20-3	2.78	0.122	1.96	329	1.55	6	1	2.84	31.98	31.54	31.98	380.04	375.82	29.948	32.227	60.5	65.1	499.9	0	363	96.33	47.1	-0.0292	0.7	111105
clear-cut strip	15	25	9:30-10:30	Large	c-15-1	3.21	0.0755	1.12	340	1.42	6	1	2.84	31.61	31.18	31.55	423.53	419.11	31.07	32.372	64.46	67.16	499.9	0	319	96.9	296	21.1	0.7	111105
clear-cut strip	15	25	9:30-10:30	Large	c-15-1	3.23	0.0749	1.12	339	1.42	6	1	2.84	31.63	31.18	31.56	423.47	419.03	31.07	32.367	64.38	67.07	499.9	0	318	96.9	296	21.1	0.7	111105
clear-cut strip	15	25	9:30-10:30	Large	c-15-1	3.13	0.0745	1.11	341	1.42	6	1	2.84	31.64	31.19	31.57	423.34	419.02	31.075	32.366	64.35	67.02	499.9	0	315	96.9	296	21.1	0.7	111105
clear-cut strip	15	25	9:30-10:30	Large	c-15-1	3.13	0.0745	1.11	341	1.42	6	1	2.84	31.64	31.19	31.57	423.34	419.02	31.075	32.366	64.35	67.02	499.9	0	315	96.9	296	21.1	0.7	111105
clear-cut strip	15	25	9:30-10:30	Large	c-15-1	2.99	0.0746	1.11	344	1.42	6	1	2.84	31.64	31.19	31.57	423.15	419	31.077	32.369	64.35	67.03	499.9	0	313	96.9	296	21.1	0.7	111105
clear-cut strip	15	18	9:30-10:30	Medium	c-15-2	2.07	0.075	1.2	345	1.52	6	1	2.84	32.09	31.68	32.07	403.35	400.29	31.28	32.671	63.14	65.95	499.9	0	433	96.89	291	21.2	1	111105
clear-cut strip	15	18	9:30-10:30	Medium	c-15-2	2.07	0.0752	1.2	346	1.52	6	1	2.84	32.1	31.69	32.07	403.39	400.33	31.281	32.676	63.13	65.94	499.9	0	433	96.89	291	21.2	1	111105
clear-cut strip	15	18	9:30-10:30	Medium	c-15-2	2.07	0.0752	1.2	346	1.52	6	1	2.84	32.1	31.69	32.07	403.39	400.33	31.281	32.676	63.13	65.94	499.9	0	433	96.89	291	21.2	1	111105
clear-cut strip	15	18	9:30-10:30	Medium	c-15-2	2.17	0.0747	1.2	343	1.53	6	1	2.84	32.11	31.69	32.08	403.48	400.3	31.287	32.675	63.1	65.9	499.9	0	434	96.89	291	21.2	1	111105
clear-cut strip	15	18	9:30-10:30	Medium	c-15-2	2.18	0.0748	1.2	343	1.52	6	1	2.84	32.12	31.68	32.08	403.54	400.35	31.294	32.681	63.08	65.87	499.9	0	435	96.89	291	21.2	1	111105
clear-cut strip	15	14	9:30-10:30	Small	c-15-3	9.37	0.0146	0.226	-620	1.45	6	1	2.84	31.39	30.96	31.36	423	411.64	31.218	31.481	65.59	66.14	499.9	0	299	96.89	290	20.2	0.7	111105
clear-cut strip	15	14	9:30-10:30	Small	c-15-3	9.51	0.014	0.217	-675	1.45	6	1	2.84	31.39	30.95	31.36	423.1	411.58	31.224	31.476	65.6	66.13	499.9	0	302	96.89	290	20.2	0.7	111105
clear-cut strip	15	14	9:30-10:30	Small	c-15-3	9.61	0.0132	0.205	-751	1.45	6	1	2.84	31.39	30.94	31.36	423.25	411.62	31.229	31.467	65.6	66.1	499.9	0	306	96.89	290	20.2	0.7	111105
clear-cut strip	15	14	9:30-10:30	Small	c-15-3	9.61	0.0132	0.205	-751	1.45	6	1	2.84	31.39	30.94	31.36	423.25	411.62	31.229	31.467	65.6	66.1	499.9	0	306	96.89	290	20.2	0.7	111105
clear-cut strip	15	14	9:30-10:30	Small	c-15-3	9.84	0.013	0.201	-796	1.44	6	1	2.84	31.38	30.93	31.36	423.58	411.67	31.238	31.472	65.64	66.13	499.9	0	307	96.89	290	20.2	1	111105
clear-cut strip	15	25	11:00-12:00	Large	c-15-1	4.72	0.0808	3.79	238	4.39	6	1	2.84	40.49	40.63	40.41	363.75	356.47	29.612	34.009	37.51	43.08	499.9	0	1175	96.39	2.44	0.458	0.7	111105
clear-cut strip	15	25	11:00-12:00	Large	c-15-1	4.69	0.0807	3.79	238	4.39	6	1	2.84	40.49	40.64	40.41	363.73	356.47	29.609	34.005	37.5	43.07	499.9	0	1174	96.39	2.44	0.458	0.7	111105
clear-cut strip	15	25	11:00-12:00	Large	c-15-1	4.67	0.0807	3.79	239	4.4	6	1	2.84	40.49	40.65	40.41	363.73	356.49	29.603	34	37.49	43.06	499.9	0	1175	96.39	2.44	0.458	0.7	111105
clear-cut strip	15	25	11:00-12:00	Large	c-15-1	4.74	0.0808	3.8	237	4.4	6	1	2.84	40.49	40.65	40.41	363.74	356.43	29.598	34.003	37.48	43.06	499.9	0	1177	96.39	2.44	0.458	0.7	111105
clear-cut strip	15	25	11:00-12:00	Large	c-15-1	4.93	0.0813	3.82	234	4.4	6	1	2.84	40.49	40.66	40.41	363.83	356.27	29.578	34.012	37.47	43.09	499.9	0	1189	96.39	2.44	0.458	0.7	111105
clear-cut strip	15	25	11:00-12:00	Large	c-15-1	6.64	0.00886	0.237	-796	2.47	6	1	2.84	34.8	35.12	34.77	405.32	397.23	32.886	33.16	57.02	57.5	500	0	995	96.87	290	20.4	0.7	111105
clear-cut strip	15	25	11:00-12:00	Large	c-15-1	6.64	0.00886	0.237	-796	2.47	6	1	2.84	34.8	35.12	34.77	405.32	397.23	32.886	33.16	57.02	57.5	500	0	995	96.87	290	20.4	0.7	111105
clear-cut strip	15	25	11:00-12:00	Large	c-15-1	6.62	0.00846	0.226	-849	2.48	6	1	2.84	34.8	35.13	34.77	405.28	397.23	32.893	33.155	57.03	57.49	500	0	994	96.87	290	20.4	0.7	111105
clear-cut strip	15	25	11:00-12:00	Large	c-15-1	6.64	0.00813	0.217	-902	2.48	6	1	2.84	34.8	35.13	34.77	405.29	397.21	32.896	33.148	57.03	57.47	500	0	993	96.87	290	20.4	0.7	111105
clear-cut strip	15	25	11:00-12:00	Large	c-15-1	6.75	0.0073	0.195	-1070	2.48	6	1	2.84	34.81	35.13	34.77	405.38	397.19	32.903	33.13	57.03	57.43	500	0	994	96.87	290	20.4	0.7	111105
clear-cut strip	15	18	11:00-12:00	Medium	c-15-2	5.76	0.0896	4.12	232	4.32	6	1	2.84	40.13	40.53	39.96	368.52	359.82	29.564	34.34	38.17	44.33	499.9	0	1619	96.39	2.44	0.458	0.7	111105
clear-cut strip	15	18	11:00-12:00	Medium	c-15-2	5.72	0.0894	4.11	232	4.31	6	1	2.84	40.13	40.52	39.97	368.45	359.81	29.575	34.342	38.18	44.33	499.9	0	1604	96.39	2.44	0.458	0.7	111105
clear-cut strip	15	18	11:00-12:00	Medium	c-15-2	5.62	0.0896	4.11	234	4.3	6	1	2.84	40.13	40.5	39.96	368.31	359.78	29.588	34.355	38.21	44.36	499.9	0	1576	96.39	2.44	0.458	0.7	111105
clear-cut strip	15	18	11:00-12:00	Medium	c-15-2	5.71	0.09	4.12	233	4.3	6	1	2.84	40.12	40.49	39.96	368.17	359.54	29.606	34.382	38.24	44.41	499.9	0	1571	96.39	2.44	0.458	0.3	111105
clear-cut strip	15	18	11:00-12:00	Medium	c-15-2	5.71	0.0901	4.12	233	4.29	6	1	2.84	40.12	40.49	39.96	368.13	359.5	29.612	34.392	38.25	44.42	499.9	0	1579	96.39	2.44	0.458	0.3	111105
clear-cut strip	15	18	11:00-12:00	Medium	c-15-2	1.8	0.0818	1.91	341	2.22	6	1	2.84	35.15	34.94	35.06	393.7	390.64	32.994	35.207	56.11	59.87	499.9	0	825	96.87	293	22	0.7	111105
clear-cut strip	15	18	11:00-12:00	Medium	c-15-2	1.8	0.0818	1.91	341	2.22	6	1	2.84	35.15	34.94	35.06	393.7	390.64	32.994	35.207	56.11	59.87	499.9	0	825	96.87	293	22	0.7	111105
clear-cut strip	15	18	11:00-12:00	Medium	c-15-2	1.84	0.0822	1.92	340	2.22	6	1	2.84	35.15	34.94	35.06	393.66	390.55	32.988	35.21	56.11	59.89	499.9	0	825	96.87	293	22	0.7	111105
clear-cut strip	15	18	11:00-12:00	Medium	c-15-2	1.87	0.0824	1.92	339	2.22	6	1	2.84	35.15	34.94	35.06	393.59	390.44	32.982	35.209	56.09	59.88	499.9	0	811	96.87	293	22	0.7	111105
clear-cut strip	15	18	11:00-12:00	Medium	c-15-2	1.84	0.0827	1.93	340	2.22	6	1	2.84	35.15	34.93	35.07	393.5	390.4	32.976	35.208	56.08	59.87	499.9	0	799	96.87	293	22	0.7	111105
clear-cut strip	15	14	11:00-12:00	Small	c-15-3	1.8	0.0869	2.02	341	2.21	6	1	2.84	35.14	34.79	35.11	392	388.9	32.45	34.79	55.23	59.21	499.9	0	562	96.87	293	22	0.7	111105
clear-cut strip	15	14	11:00-12:00	Small	c-15-3	1.83	0.0869	2.02	340	2.21	6	1	2.84	35.13	34.79	35.11	392.03	388.89	32.453	34.792	55.24	59.22	499.9	0	562	96.87	293	22	0.7	111105
clear-cut strip	15	14	11:00-12:00	Small	c-15-3	1.86	0.0868	2.02	340	2.21	6	1	2.84	35.14	34.79	35.11	392.06	388.89	32.454	34.793	55.23	59.21	499.9	0	563	96.87	293	22	0.7	111105
clear-cut strip	15	14	11:00-12:00	Small	c-15-3	1.9	0.0867	2.02	339	2.21	6	1	2.84	35.14	34.8	35.11	392.07	388.84	32.455	34.792	55.22	59.2	499.9	0	563	96.87	293	22	0.7	111105
clear-cut strip	15	14	11:00-12:00	Small	c-15-3	1.95	0.0872	2.03	338	2.21	6	1	2.84	35.15	34.8	35.11	392.13	388.84	32.457	34.805	55.21	59.21	499.9	0	564	96.87	293	22	0.7	111105
clear-cut strip	15	14	11:00-12:00	Small	c-15-3	4.76	0.0782	3.36	241	4.03	6	1	2.84	39.66	39.53	39.56	369.2	362.03	29.353	33.254	38.86	44.02	499.9	0	1424	96.39	2.44	0.458	0.7	111105
clear-cut strip	15	14	11:00-12:00	Small	c-15-3	4.78	0.0786	3.38	241	4.02	6	1	2.84	39.67	39.53	39.56	369.17	361.97	29.347	33.265	38.84	44.02	499.9	0	1422	96.39	2.44	0.458	0.7	111105
clear-cut strip	15	14	11:00-12:00	Small	c-15-3	4.74	0.0789	3.39	242	4.02	6	1	2.84	39.67	39.53	39.56	369.15	362	29.341	33.272	38.82	44.02	499.9	0	1420	96.39	2.44	0.458	0.7	111105
clear-cut strip	15	14	11:00-12:00	Small	c-15-3	4.76	0.0791	3.4	242	4.02	6	1	2.84	39.67	39.53	39.56	369.16	361.96	29.333	33.275	38.81	44.02	499.9	0	1420	96.39	2.44	0.458	0.7	111105
clear-cut strip	15	14	11:00-12:00	Small	c-15-3	4.76	0.0791	3.4	242	4.02	6	1	2.84	39.68	39.53	39.57	369.13	361.95	29.317	33.258	38.78	43.99	499.9	0	1420	96.39	2.44	0.458	0.7	111105
clear-cut strip	15	25	13:00-14:00	Large	c-15-1	3	0.0753	2.28	282	2.85	6	1	2.84	34.83	35.77	34.7	367.21	362.62	28.957	31.602	49.85	54.4	499.9	0	1572	96.32	3.78	0.765	0.7	111105
clear-cut strip	15	25	13:00-14:00	Large	c-15-1	3.18	0.0765	2.31	278	2.84	6	1	2.84	34.84	35.75	34.71	367.04	362.22	28.949	31.629	49.81	54.43	499.9	0	1572	96.32	3.78	0.765	0.7	111105
clear-cut strip	15	25	13:00-14:00	Large	c-15-1	3.21	0.0769	2.31	278	2.84	6	1	2.84	34.84	35.75	34.71	366.94	362.09	28.946	31.636	49.8	54.43	499.9	0	1574	96.32	3.78	0.765	0.7	111105
clear-cut strip	15	25	13:00-14:00	Large	c-15-1	3.34	0.0775	2.33	276	2.84	6	1	2.84	34.84	35.76	34.72	366.86	361.85	28.942	31.654	49.78	54.44	499.9	0	1576	96.32	3.78	0.765	0.7	111105
clear-cut strip	15	25	13:00-14:00	Large	c-15-1	3.32	0.0771	2.33	275	2.85	6	1	2.84	34.85	35.79	34.73	366.65	361.66	28.929	31.638	49.73	54.39	499.9	0	1580	96.32	3.78	0.765	0.7	111105
clear-cut strip	15	25	13:00-14:00	Large	c-15-1	1.06	0.0526	1.19	340	2.13	6	1	2.84	35.02	34.35	35.05	388.28	386.45	32.918	34.295	56.37	58.73	499.9	0	491	96.83	290	21.7	0.7	111105
clear-cut strip	15	25	13:00-14:00	Large	c-15-1	1.1	0.0528	1.19	339	2.13	6	1	2.84	35.02	34.35	35.05	388.25	386.38	32.917	34.299	56.37	58.74	499.9	0	490	96.83	290	21.7	0.7	111105
clear-cut strip	15	25	13:00-14:00	Large	c-15-1	1.1	0.0525	1.19	339	2.13	6	1	2.84	35.02	34.36	35.05	388.13	386.25	32.925	34.301	56.39	58.74	499.9	0	488	96.83	290	21.7	0.7	111105
clear-cut strip	15	25	13:00-14:00	Large	c-15-1	1.07	0.0524	1.19	340	2.13	6	1	2.84	35.02	34.36	35.05	388.01	386.17	32.924	34.298	56.39	58.74	499.9	0	485	96.83	290	21.7	0.7	111105
clear-cut strip	15	25	13:00-14:00	Large	c-15-1	1.13	0.0524	1.19	338	2.13	6	1	2.84	35.02	34.37	35.05	387.97	386.07	32.928	34.305	56.39	58.75	499.9	0	485	96.83	290	21.7	0.7	111105
clear-cut strip	15	18	13:00-14:00	Medium	c-15-2	3.92	0.0808	2.49	261	2.91	6	1	2.84	35.42	36.13	35.24	361.87	356.1	29.362	32.253	48.92	53.74	499.9	0	1451	96.32	3.78	0.765	0.3	111105
clear-cut strip	15	18	13:00-14:00	Medium	c-15-2	3.96	0.0805	2.48	260	2.91	6	1	2.84	35.4	36.14	35.24	361.83	356.01	29.352	32.234	48.97	53.77	499.9	0	1459	96.32	3.78	0.765	0.3	111105
clear-cut strip	15	18	13:00-14:00	Medium	c-15-2	3.97	0.0802	2.48	259	2.91	6	1	2.84	35.38	36.15	35.24	361.75	355.93	29.34	32.217	48.98	53.78	499.9	0	1466	96.32	3.78	0.765	0.3	111105
clear-cut strip	15	18	13:00-14:00	Medium	c-15-2	3.93	0.0801	2.48	260	2.92	6	1	2.84	35.37	36.15	35.24	361.67	355.89	29.328	32.206	48.99	53.79	499.9	0	1472	96.32	3.78	0.765	0.3	111105
clear-cut strip	15	18	13:00-14:00	Medium	c-15-2	3.99	0.0796	2.47	258	2.93	6	1	2.84	35.38	36.18	35.24	361.58	355.73	29.319	32.188	48.96	53.75	499.9	0	1481	96.32	3.78	0.765	0.3	111105
clear-cut strip	15	18	13:00-14:00	Medium	c-15-2	2.27	0.0557	1.32	306	2.23	6	1	2.84	34.9	34.58	34.93	389.13	385.8	32.469	33.994	55.98	58.61	499.9	0	425	96.82	290	21.7	0.7	111105
clear-cut strip	15	18	13:00-14:00	Medium	c-15-2	2.27	0.0557	1.32	306	2.23	6	1	2.84	34.9	34.58	34.93	389.13	385.8	32.469	33.994	55.98	58.61	499.9	0	425	96.82	290	21.7	0.7	111105
clear-cut strip	15	18	13:00-14:00	Medium	c-15-2	2.24	0.0553	1.31	307	2.23	6	1	2.84	34.9	34.58	34.93	389.2	385.91	32.477	33.994	55.99	58.61	499.9	0	424	96.82	290	21.7	0.7	111105
clear-cut strip	15	18	13:00-14:00	Medium	c-15-2	2.32	0.0549	1.3	304	2.23	6	1	2.84	34.9	34.58	34.93	389.41	386.02	32.489	33.995	56.01	58.61	499.9	0	423	96.82	290	21.7	0.7	111105
clear-cut strip	15	18	13:00-14:00	Medium	c-15-2	2.32	0.0549	1.3	304	2.23	6	1	2.84	34.9	34.58	34.93	389.53	386.14	32.501	34.005	56.03	58.62	499.9	0	422	96.82	290	21.7	0.7	111105
clear-cut strip	15	14	13:00-14:00	Small	c-15-3	0.944	0.0657	1.4	346	2.01	6	1	2.84	34.78	33.95	34.74	383.85	382.08	32.597	34.218	56.56	59.37	499.9	0	420	96.83	290	21.7	0.7	111105
clear-cut strip	15	14	13:00-14:00	Small	c-15-3	0.946	0.0661	1.41	346	2.01	6	1	2.84	34.79	33.95	34.74	383.86	382.08	32.593	34.223	56.54	59.37	499.9	0	421	96.83	290	21.7	0.7	111105
clear-cut strip	15	14	13:00-14:00	Small	c-15-3	0.951	0.0662	1.41	346	2.02	6	1	2.84	34.79	33.95	34.74	383.87	382.08	32.589	34.222	56.53	59.36	499.9	0	422	96.82	290	21.7	0.7	111105
clear-cut strip	15	14	13:00-14:00	Small	c-15-3	0.923	0.0666	1.42	347	2.01	6	1	2.84	34.79	33.95	34.74	383.84	382.08	32.585	34.227	56.52	59.37	499.9	0	421	96.82	290	21.7	0.7	111105
clear-cut strip	15	14	13:00-14:00	Small	c-15-3	0.874	0.0672	1.43	348	2.01	6	1	2.84	34.79	33.95	34.75	383.84	382.14	32.577	34.234	56.5	59.38	499.9	0	421	96.82	290	21.7	0.7	111105
clear-cut strip	15	14	13:00-14:00	Small	c-15-3	4.38	0.077	2.35	245	2.88	6	1	2.84	35.85	36.19	35.67	359.26	353	29.98	32.712	48.78	53.23	499.9	0	569	96.32	3.78	0.765	0.7	111105
clear-cut strip	15	14	13:00-14:00	Small	c-15-3	4.32	0.078	2.36	248	2.85	6	1	2.84	35.86	36.1	35.67	359.31	353.12	29.957	32.699	48.71	53.17	499.9	0	536	96.32	3.78	0.765	0.7	111105
clear-cut strip	15	14	13:00-14:00	Small	c-15-3	4.18	0.0786	2.36	251	2.83	6	1	2.84	35.84	36.03	35.67	359.25	353.22	29.936	32.676	48.74	53.2	499.9	0	540	96.32	3.78	0.765	0.7	111105
clear-cut strip	15	14	13:00-14:00	Small	c-15-3	4.16	0.0785	2.35	251	2.83	6	1	2.84	35.83	36.02	35.67	359.23	353.23	29.928	32.661	48.74	53.2	499.9	0	536	96.32	3.78	0.765	0.7	111105
clear-cut strip	15	14	13:00-14:00	Small	c-15-3	4.18	0.0778	2.34	250	2.84	6	1	2.84	35.82	36.04	35.66	359.19	353.18	29.917	32.638	48.77	53.2	499.9	0	504	96.32	3.78	0.765	0.7	111105
clear-cut strip	15	25	14:30-15:30	Large	c-15-1	4.76	0.157	2.79	316	1.73	6	1	2.84	32.25	32.41	32.22	384.15	377.17	29.56	32.804	58.79	65.24	499.9	0	892	96.3	47.1	-0.0292	0.7	111105
clear-cut strip	15	25	14:30-15:30	Large	c-15-1	4.79	0.157	2.78	316	1.73	6	1	2.84	32.25	32.42	32.22	384.14	377.13	29.564	32.797	58.79	65.22	499.9	0	895	96.3	47.1	-0.0292	0.7	111105
clear-cut strip	15	25	14:30-15:30	Large	c-15-1	4.85	0.156	2.77	314	1.73	6	1	2.84	32.25	32.42	32.22	384.11	377.03	29.569	32.786	58.79	65.19	499.9	0	901	96.3	47.1	-0.0292	0.7	111105
clear-cut strip	15	25	14:30-15:30	Large	c-15-1	4.86	0.155	2.77	314	1.73	6	1	2.84	32.25	32.43	32.23	384.07	376.99	29.574	32.785	58.79	65.17	499.9	0	907	96.3	47.1	-0.0292	0.7	111105
clear-cut strip	15	25	14:30-15:30	Large	c-15-1	4.86	0.155	2.77	314	1.73	6	1	2.84	32.25	32.43	32.23	384.07	376.99	29.574	32.785	58.79	65.17	499.9	0	907	96.3	47.1	-0.0292	0.7	111105
clear-cut strip	15	25	14:30-15:30	Large	c-15-1	1.58	0.0707	0.964	340	1.3	6	1	2.84	32.09	30.98	32.01	387.18	384.85	32.017	33.136	64.54	66.8	499.9	0	268	96.77	287	21.4	1	111105
clear-cut strip	15	25	14:30-15:30	Large	c-15-1	1.58	0.0707	0.964	340	1.3	6	1	2.84	32.09	30.98	32.01	387.18	384.85	32.017	33.136	64.54	66.8	499.9	0	268	96.77	287	21.4	1	111105
clear-cut strip	15	25	14:30-15:30	Large	c-15-1	1.57	0.0702	0.957	340	1.3	6	1	2.84	32.09	30.97	32.01	387.2	384.87	32.02	33.131	64.56	66.8	499.9	0	267	96.77	287	21.4	1	111105
clear-cut strip	15	25	14:30-15:30	Large	c-15-1	1.59	0.0705	0.959	340	1.3	6	1	2.84	32.09	30.97	32.01	387.17	384.83	32.02	33.133	64.55	66.79	499.9	0	265	96.77	287	21.4	1	111105
clear-cut strip	15	25	14:30-15:30	Large	c-15-1	1.59	0.0707	0.962	340	1.3	6	1	2.84	32.1	30.97	32.02	387.1	384.75	32.022	33.139	64.54	66.79	499.9	0	263	96.77	287	21.4	1	111105
clear-cut strip	15	18	14:30-15:30	Medium	c-15-2	4.71	0.2	3.11	328	1.54	6	1	2.84	32.67	31.7	32.63	383.96	376.91	29.184	32.791	56.68	63.69	499.9	0	345	96.3	47.1	-0.0292	0.7	111105
clear-cut strip	15	18	14:30-15:30	Medium	c-15-2	4.72	0.199	3.1	327	1.54	6	1	2.84	32.66	31.72	32.63	383.91	376.84	29.175	32.78	56.67	63.67	499.9	0	344	96.3	47.1	-0.0292	0.7	111105
clear-cut strip	15	18	14:30-15:30	Medium	c-15-2	4.64	0.195	3.07	327	1.55	6	1	2.84	32.66	31.73	32.63	383.86	376.91	29.174	32.733	56.67	63.58	499.9	0	342	96.3	47.1	-0.0292	0.7	111105
clear-cut strip	15	18	14:30-15:30	Medium	c-15-2	4.37	0.19	3.01	329	1.56	6	1	2.84	32.67	31.74	32.64	383.84	377.24	29.174	32.671	56.65	63.44	499.9	0	342	96.3	47.1	-0.0292	0.7	111105
clear-cut strip	15	18	14:30-15:30	Medium	c-15-2	4.13	0.187	2.96	331	1.56	6	1	2.84	32.68	31.74	32.64	383.86	377.55	29.173	32.615	56.6	63.28	499.9	0	342	96.3	47.1	-0.0292	0.7	111105
clear-cut strip	15	18	14:30-15:30	Medium	c-15-2	1.15	0.054	0.881	353	1.54	6	1	2.84	31.86	31.77	31.91	399.51	397.7	31.739	32.762	64.82	66.91	499.9	0	177	96.77	287	21.4	0.3	111105
clear-cut strip	15	18	14:30-15:30	Medium	c-15-2	1.15	0.054	0.881	353	1.54	6	1	2.84	31.86	31.77	31.91	399.51	397.7	31.739	32.762	64.82	66.91	499.9	0	177	96.77	287	21.4	0.3	111105
clear-cut strip	15	18	14:30-15:30	Medium	c-15-2	1.24	0.0541	0.88	350	1.54	6	1	2.84	31.86	31.76	31.91	399.43	397.52	31.741	32.762	64.82	66.91	499.9	0	180	96.77	287	21.4	0.3	111105
clear-cut strip	15	18	14:30-15:30	Medium	c-15-2	1.28	0.0553	0.897	350	1.53	6	1	2.84	31.87	31.74	31.91	399.31	397.34	31.735	32.776	64.8	66.93	499.9	0	182	96.77	287	21.4	0.3	111105
clear-cut strip	15	18	14:30-15:30	Medium	c-15-2	1.42	0.0563	0.907	346	1.53	6	1	2.84	31.87	31.71	31.91	399.03	396.9	31.73	32.784	64.78	66.94	499.9	0	188	96.77	287	21.4	0.3	111105
clear-cut strip	15	14	14:30-15:30	Small	c-15-3	2.56	0.0532	0.795	301	1.42	6	1	2.84	31.92	31.23	31.91	391.43	387.99	31.671	32.595	64.49	66.37	499.9	0	222	96.77	287	21.4	1	111105
clear-cut strip	15	14	14:30-15:30	Small	c-15-3	2.56	0.0532	0.795	301	1.42	6	1	2.84	31.92	31.23	31.91	391.43	387.99	31.671	32.595	64.49	66.37	499.9	0	222	96.77	287	21.4	1	111105
clear-cut strip	15	14	14:30-15:30	Small	c-15-3	2.6	0.0527	0.788	299	1.42	6	1	2.84	31.92	31.22	31.91	391.44	387.95	31.671	32.586	64.48	66.35	499.9	0	222	96.77	287	21.4	1	111105
clear-cut strip	15	14	14:30-15:30	Small	c-15-3	2.65	0.0523	0.781	297	1.41	6	1	2.84	31.91	31.21	31.92	391.42	387.87	31.674	32.581	64.5	66.34	499.8	0	221	96.77	287	21.4	1	111105
clear-cut strip	15	14	14:30-15:30	Small	c-15-3	2.74	0.0526	0.785	295	1.41	6	1	2.84	31.93	31.21	31.92	391.4	387.74	31.677	32.588	64.46	66.31	499.8	0	221	96.77	287	21.4	1	111105
clear-cut strip	15	14	14:30-15:30	Small	c-15-3	2.45	0.112	2.04	338	1.75	6	1	2.84	32.86	32.26	32.82	388.68	384.8	29.792	32.157	57.24	61.79	499.9	0	228	96.29	47.1	-0.0292	0.7	111105
clear-cut strip	15	14	14:30-15:30	Small	c-15-3	2.42	0.111	2.03	338	1.75	6	1	2.84	32.85	32.26	32.82	388.6	384.76	29.802	32.156	57.27	61.8	499.9	0	226	96.29	47.1	-0.0292	0.7	111105
clear-cut strip	15	14	14:30-15:30	Small	c-15-3	2.48	0.111	2.02	337	1.75	6	1	2.84	32.85	32.26	32.82	388.57	384.66	29.811	32.159	57.3	61.81	499.9	0	224	96.29	47.1	-0.0292	0.7	111105
clear-cut strip	15	14	14:30-15:30	Small	c-15-3	2.43	0.111	2.03	338	1.75	6	1	2.84	32.84	32.25	32.82	388.5	384.64	29.819	32.172	57.33	61.86	499.9	0	223	96.29	47.1	-0.0292	0.7	111105
clear-cut strip	15	14	14:30-15:30	Small	c-15-3	2.5	0.112	2.03	337	1.74	6	1	2.84	32.86	32.24	32.82	388.47	384.54	29.833	32.193	57.31	61.84	499.9	0	223	96.29	47.1	-0.0292	1	111105
uncut strip	18	23	9:30-10:30	Large	b-5-1	0.373	0.0742	1.18	382	1.51	6	1	2.84	31.93	31.4	31.96	401.02	400.01	30.656	32.022	62.41	65.19	499.9	0	47	96.85	290	21.4	1	111105
uncut strip	18	23	9:30-10:30	Large	b-5-1	0.373	0.0742	1.18	382	1.51	6	1	2.84	31.93	31.4	31.96	401.02	400.01	30.656	32.022	62.41	65.19	499.9	0	47	96.85	290	21.4	1	111105
uncut strip	18	23	9:30-10:30	Large	b-5-1	0.389	0.074	1.17	381	1.51	6	1	2.84	31.93	31.39	31.96	401.02	399.99	30.651	32.014	62.4	65.18	499.9	0	47	96.85	290	21.4	1	111105
uncut strip	18	23	9:30-10:30	Large	b-5-1	0.437	0.0742	1.17	380	1.51	6	1	2.84	31.93	31.38	31.96	401.04	399.95	30.649	32.013	62.41	65.19	499.9	0	47	96.85	290	21.4	1	111105
uncut strip	18	23	9:30-10:30	Large	b-5-1	0.406	0.0739	1.17	381	1.51	6	1	2.84	31.93	31.38	31.96	401.04	399.99	30.643	32.003	62.39	65.16	499.8	0	47	96.85	290	21.4	1	111105
uncut strip	18	19	9:30-10:30	Medium	b-5-2	0.731	0.0707	1.08	377	1.46	6	1	2.84	31.72	31.16	31.74	405.07	403.66	30.632	31.892	63.13	65.73	499.9	0	53	96.85	290	21.4	1	111105
uncut strip	18	19	9:30-10:30	Medium	b-5-2	0.731	0.0707	1.08	377	1.46	6	1	2.84	31.72	31.16	31.74	405.07	403.66	30.632	31.892	63.13	65.73	499.9	0	53	96.85	290	21.4	1	111105
uncut strip	18	19	9:30-10:30	Medium	b-5-2	0.588	0.0708	1.09	380	1.46	6	1	2.84	31.72	31.15	31.74	405.07	403.84	30.632	31.894	63.12	65.72	499.9	0	53	96.85	290	21.4	1	111105
uncut strip	18	19	9:30-10:30	Medium	b-5-2	0.524	0.0704	1.08	382	1.46	6	1	2.84	31.72	31.15	31.74	405.09	403.94	30.63	31.885	63.11	65.69	499.9	0	53	96.85	290	21.4	1	111105
uncut strip	18	19	9:30-10:30	Medium	b-5-2	0.446	0.0709	1.09	384	1.46	6	1	2.84	31.72	31.14	31.73	405.08	404.02	30.624	31.886	63.09	65.69	500	0	52	96.85	290	21.4	0.7	111105
uncut strip	18	12	9:30-10:30	Small	b-5-3	-0.961	0.0432	0.634	430	1.39	6	1	2.84	31.23	30.57	31.32	403.28	404.13	30.393	31.13	64.39	65.95	499.9	0	58	96.84	291	21	0.7	111105
uncut strip	18	12	9:30-10:30	Small	b-5-3	-0.961	0.0432	0.634	430	1.39	6	1	2.84	31.23	30.57	31.32	403.28	404.13	30.393	31.13	64.39	65.95	499.9	0	58	96.84	291	21	0.7	111105
uncut strip	18	12	9:30-10:30	Small	b-5-3	-1.05	0.0432	0.634	434	1.39	6	1	2.84	31.23	30.57	31.32	403.28	404.23	30.395	31.132	64.41	65.97	499.9	0	58	96.84	291	21	0.7	111105
uncut strip	18	12	9:30-10:30	Small	b-5-3	-1.17	0.043	0.631	438	1.39	6	1	2.84	31.23	30.57	31.32	403.3	404.39	30.398	31.131	64.42	65.97	499.9	0	58	96.84	291	21	0.7	111105
uncut strip	18	12	9:30-10:30	Small	b-5-3	-1.55	0.0425	0.623	454	1.39	6	1	2.84	31.23	30.57	31.31	403.26	404.81	30.401	31.126	64.43	65.96	499.9	0	57	96.84	291	21	0.7	111105
uncut strip	18	23	11:00-12:00	Large	b-5-1	-5.61	0.0285	0.701	669	2.29	6	1	2.84	33.94	32.86	34.12	366	372.41	27.409	28.227	49.57	51.05	499.9	0	42	96.32	3.78	0.765	0.3	111105
uncut strip	18	23	11:00-12:00	Large	b-5-1	-0.473	0.0384	0.873	373	2.13	6	1	2.84	33.27	32.41	33.33	366.61	366.79	27.575	28.593	51.77	53.68	499.9	0	64	96.32	3.78	0.765	1	111105
uncut strip	18	23	11:00-12:00	Large	b-5-1	-0.438	0.0384	0.874	372	2.13	6	1	2.84	33.27	32.4	33.33	366.63	366.77	27.574	28.593	51.78	53.69	499.9	0	65	96.32	3.78	0.765	1	111105
uncut strip	18	23	11:00-12:00	Large	b-5-1	-0.462	0.0383	0.871	373	2.13	6	1	2.84	33.27	32.4	33.33	366.6	366.77	27.573	28.589	51.79	53.7	499.9	0	62	96.32	3.78	0.765	1	111105
uncut strip	18	23	11:00-12:00	Large	b-5-1	-0.427	0.0383	0.871	371	2.13	6	1	2.84	33.26	32.4	33.32	366.57	366.7	27.572	28.587	51.8	53.71	499.9	0	59	96.32	3.78	0.765	1	111105
uncut strip	18	23	11:00-12:00	Large	b-5-1	-0.369	0.038	0.863	369	2.13	6	1	2.84	33.26	32.39	33.32	366.54	366.6	27.566	28.573	51.8	53.69	499.9	0	61	96.32	3.78	0.765	1	111105
uncut strip	18	23	11:00-12:00	Large	b-5-1	0.491	0.0551	1.11	366	1.9	6	1	2.84	33.55	33.01	33.58	393.87	392.76	31.28	32.566	58.14	60.53	499.9	0	76	96.84	290	21.6	0.7	111105
uncut strip	18	23	11:00-12:00	Large	b-5-1	0.491	0.0551	1.11	366	1.9	6	1	2.84	33.55	33.01	33.58	393.87	392.76	31.28	32.566	58.14	60.53	499.9	0	76	96.84	290	21.6	0.7	111105
uncut strip	18	23	11:00-12:00	Large	b-5-1	0.526	0.0554	1.11	365	1.9	6	1	2.84	33.55	33.01	33.58	393.87	392.71	31.278	32.571	58.14	60.54	499.9	0	76	96.84	290	21.6	0.7	111105
uncut strip	18	23	11:00-12:00	Large	b-5-1	0.47	0.0554	1.11	367	1.9	6	1	2.84	33.55	33.01	33.58	393.85	392.76	31.274	32.567	58.14	60.54	499.9	0	76	96.84	290	21.6	0.7	111105
uncut strip	18	23	11:00-12:00	Large	b-5-1	0.444	0.0553	1.11	367	1.9	6	1	2.84	33.55	33	33.58	393.79	392.73	31.272	32.564	58.13	60.54	499.8	0	76	96.84	290	21.6	0.7	111105
uncut strip	18	19	11:00-12:00	Medium	b-5-2	-0.0391	0.0417	1.27	350	2.85	6	1	2.84	35.57	35	35.6	366.27	365.76	27.604	29.085	45.62	48.06	499.9	0	87	96.32	4.73	0.512	1	111105
uncut strip	18	19	11:00-12:00	Medium	b-5-2	0.13	0.0419	1.27	343	2.84	6	1	2.84	35.56	34.99	35.59	366.34	365.63	27.607	29.091	45.64	48.09	499.9	0	87	96.32	4.73	0.512	1	111105
uncut strip	18	19	11:00-12:00	Medium	b-5-2	0.257	0.0414	1.26	338	2.84	6	1	2.84	35.56	34.98	35.58	366.33	365.47	27.602	29.07	45.65	48.07	499.9	0	87	96.32	4.73	0.512	1	111105
uncut strip	18	19	11:00-12:00	Medium	b-5-2	0.159	0.0411	1.25	342	2.84	6	1	2.84	35.55	34.98	35.58	366.29	365.55	27.609	29.065	45.68	48.08	499.9	0	86	96.32	4.73	0.512	0.7	111105
uncut strip	18	19	11:00-12:00	Medium	b-5-2	0.172	0.0418	1.27	342	2.84	6	1	2.84	35.54	34.97	35.57	366.36	365.6	27.607	29.086	45.68	48.13	499.9	0	86	96.32	4.73	0.512	1	111105
uncut strip	18	19	11:00-12:00	Medium	b-5-2	0.963	0.045	0.832	344	1.75	6	1	2.84	33.09	32.29	33.15	390.81	389.27	31.138	32.105	59.37	61.22	499.9	0	105	96.84	288	21.4	0.7	111105
uncut strip	18	19	11:00-12:00	Medium	b-5-2	0.963	0.045	0.832	344	1.75	6	1	2.84	33.09	32.29	33.15	390.81	389.27	31.138	32.105	59.37	61.22	499.9	0	105	96.84	288	21.4	0.7	111105
uncut strip	18	19	11:00-12:00	Medium	b-5-2	0.945	0.045	0.834	344	1.75	6	1	2.84	33.1	32.29	33.15	390.8	389.27	31.134	32.103	59.35	61.2	499.8	0	104	96.84	288	21.4	0.7	111105
uncut strip	18	19	11:00-12:00	Medium	b-5-2	0.918	0.0446	0.826	345	1.75	6	1	2.84	33.1	32.29	33.15	390.79	389.3	31.135	32.095	59.33	61.16	499.8	0	105	96.84	288	21.4	0.7	111105
uncut strip	18	19	11:00-12:00	Medium	b-5-2	0.842	0.0445	0.822	348	1.74	6	1	2.84	33.11	32.28	33.15	390.78	389.38	31.131	32.086	59.29	61.11	499.9	0	105	96.84	288	21.4	0.7	111105
uncut strip	18	12	11:00-12:00	Small	b-5-3	0.199	0.0575	0.989	374	1.63	6	1	2.84	32.78	31.92	32.9	391.37	390.67	31.094	32.243	60.35	62.58	499.9	0	83	96.84	288	21.4	0.3	111105
uncut strip	18	12	11:00-12:00	Small	b-5-3	0.199	0.0575	0.989	374	1.63	6	1	2.84	32.78	31.92	32.9	391.37	390.67	31.094	32.243	60.35	62.58	499.9	0	83	96.84	288	21.4	0.3	111105
uncut strip	18	12	11:00-12:00	Small	b-5-3	0.199	0.0577	0.992	374	1.63	6	1	2.84	32.78	31.92	32.9	391.36	390.66	31.096	32.249	60.35	62.59	499.9	0	83	96.84	288	21.4	0.3	111105
uncut strip	18	12	11:00-12:00	Small	b-5-3	0.218	0.0582	1	374	1.63	6	1	2.84	32.78	31.92	32.9	391.34	390.61	31.096	32.257	60.35	62.6	499.9	0	83	96.84	288	21.4	0.3	111105
uncut strip	18	12	11:00-12:00	Small	b-5-3	0.203	0.0584	1	374	1.63	6	1	2.84	32.78	31.93	32.9	391.3	390.59	31.101	32.267	60.34	62.61	499.9	0	83	96.84	288	21.4	0.3	111105
uncut strip	18	12	11:00-12:00	Small	b-5-3	0.141	0.0586	1.01	376	1.63	6	1	2.84	32.79	31.94	32.89	391.2	390.55	31.103	32.275	60.34	62.61	499.9	0	82	96.84	288	21.4	0.3	111105
uncut strip	18	12	11:00-12:00	Small	b-5-3	0.472	0.0329	1.08	325	3.05	6	1	2.84	36.57	35.73	36.64	367.27	366.23	28.166	29.422	44.05	46.01	499.9	0	63	96.33	4.73	0.512	0.7	111105
uncut strip	18	12	11:00-12:00	Small	b-5-3	0.533	0.0329	1.08	322	3.04	6	1	2.84	36.57	35.72	36.63	367.24	366.13	28.161	29.416	44.05	46.02	499.9	0	61	96.33	4.73	0.512	0.7	111105
uncut strip	18	12	11:00-12:00	Small	b-5-3	0.489	0.033	1.08	324	3.04	6	1	2.84	36.56	35.69	36.62	367.16	366.1	28.155	29.408	44.07	46.03	499.9	0	58	96.33	4.73	0.512	0.7	111105
uncut strip	18	12	11:00-12:00	Small	b-5-3	0.487	0.0328	1.07	324	3.03	6	1	2.84	36.55	35.67	36.62	367.11	366.06	28.153	29.396	44.08	46.02	499.9	0	56	96.33	4.73	0.512	0.7	111105
uncut strip	18	12	11:00-12:00	Small	b-5-3	0.423	0.0328	1.07	327	3.03	6	1	2.84	36.54	35.66	36.61	366.97	365.99	28.151	29.394	44.1	46.05	499.9	0	54	96.33	4.73	0.512	0.7	111105
uncut strip	18	23	13:00-14:00	Large	b-5-1	-0.414	0.0373	0.996	367	2.5	6	1	2.84	34.37	33.72	34.38	364.5	364.56	27.557	28.719	48.64	50.69	499.9	0	42	96.27	2.71	0.729	0.7	111105
uncut strip	18	23	13:00-14:00	Large	b-5-1	-0.388	0.0372	0.996	366	2.5	6	1	2.84	34.37	33.73	34.38	364.51	364.54	27.554	28.715	48.63	50.68	499.9	0	42	96.27	2.71	0.729	0.7	111105
uncut strip	18	23	13:00-14:00	Large	b-5-1	-0.385	0.037	0.99	366	2.5	6	1	2.84	34.37	33.74	34.38	364.52	364.55	27.554	28.708	48.63	50.67	499.9	0	42	96.28	2.71	0.729	0.7	111105
uncut strip	18	23	13:00-14:00	Large	b-5-1	-0.362	0.037	0.987	365	2.5	6	1	2.84	34.37	33.72	34.38	364.53	364.53	27.552	28.703	48.64	50.67	499.9	0	42	96.27	2.71	0.729	0.7	111105
uncut strip	18	23	13:00-14:00	Large	b-5-1	-0.331	0.0367	0.98	363	2.49	6	1	2.84	34.36	33.71	34.38	364.52	364.49	27.551	28.693	48.65	50.66	499.9	0	42	96.27	2.71	0.729	0.7	111105
uncut strip	18	23	13:00-14:00	Large	b-5-1	0.224	0.0451	0.766	366	1.6	6	1	2.84	32.37	31.91	32.41	385.38	384.75	31.682	32.573	62.86	64.63	499.8	0	50	96.73	287	21.5	1	111105
uncut strip	18	23	13:00-14:00	Large	b-5-1	0.224	0.0451	0.766	366	1.6	6	1	2.84	32.37	31.91	32.41	385.38	384.75	31.682	32.573	62.86	64.63	499.8	0	50	96.73	287	21.5	1	111105
uncut strip	18	23	13:00-14:00	Large	b-5-1	0.258	0.0449	0.764	365	1.6	6	1	2.84	32.37	31.92	32.41	385.44	384.77	31.684	32.571	62.87	64.63	499.8	0	50	96.73	287	21.5	1	111105
uncut strip	18	23	13:00-14:00	Large	b-5-1	0.272	0.0453	0.77	365	1.6	6	1	2.84	32.37	31.92	32.41	385.52	384.84	31.683	32.576	62.86	64.64	499.9	0	50	96.73	287	21.5	1	111105
uncut strip	18	23	13:00-14:00	Large	b-5-1	0.325	0.0453	0.77	363	1.6	6	1	2.84	32.37	31.92	32.41	385.7	384.95	31.685	32.579	62.87	64.64	500	0	50	96.73	287	21.5	1	111105
uncut strip	18	19	13:00-14:00	Medium	b-5-2	0.066	0.0372	0.814	368	2.05	6	1	2.84	33.07	32.41	33.14	384.47	384.02	28.507	29.456	54.12	55.92	499.9	0	53	96.27	47.1	-0.0292	0.3	111105
uncut strip	18	19	13:00-14:00	Medium	b-5-2	0.0896	0.0373	0.815	367	2.05	6	1	2.84	33.06	32.4	33.14	384.4	383.92	28.516	29.465	54.15	55.95	499.9	0	52	96.27	47.1	-0.0292	0.3	111105
uncut strip	18	19	13:00-14:00	Medium	b-5-2	0.201	0.0369	0.808	362	2.05	6	1	2.84	33.06	32.4	33.13	384.39	383.78	28.528	29.468	54.17	55.96	499.9	0	52	96.27	47.1	-0.0292	0.3	111105
uncut strip	18	19	13:00-14:00	Medium	b-5-2	0.273	0.0366	0.801	358	2.05	6	1	2.84	33.06	32.4	33.13	384.34	383.65	28.535	29.468	54.19	55.97	499.9	0	51	96.27	47.1	-0.0292	0.7	111105
uncut strip	18	19	13:00-14:00	Medium	b-5-2	0.202	0.0365	0.797	362	2.04	6	1	2.84	33.06	32.39	33.13	384.27	383.67	28.545	29.474	54.22	55.98	499.9	0	51	96.27	47.1	-0.0292	0.7	111105
uncut strip	18	19	13:00-14:00	Medium	b-5-2	0.883	0.0437	0.734	344	1.58	6	1	2.84	32.32	31.84	32.37	387.97	386.57	31.719	32.571	63.1	64.8	499.8	0	61	96.73	287	21.5	0.7	111105
uncut strip	18	19	13:00-14:00	Medium	b-5-2	0.883	0.0437	0.734	344	1.58	6	1	2.84	32.32	31.84	32.37	387.97	386.57	31.719	32.571	63.1	64.8	499.8	0	61	96.73	287	21.5	0.7	111105
uncut strip	18	19	13:00-14:00	Medium	b-5-2	0.837	0.0436	0.732	346	1.58	6	1	2.84	32.32	31.84	32.37	387.94	386.6	31.719	32.568	63.1	64.79	499.9	0	61	96.73	287	21.5	1	111105
uncut strip	18	19	13:00-14:00	Medium	b-5-2	0.805	0.0434	0.728	347	1.58	6	1	2.84	32.32	31.83	32.37	387.94	386.63	31.722	32.567	63.1	64.79	500	0	61	96.73	287	21.5	1	111105
uncut strip	18	19	13:00-14:00	Medium	b-5-2	0.837	0.0434	0.726	345	1.58	6	1	2.84	32.32	31.82	32.37	387.9	386.56	31.723	32.566	63.1	64.78	500.1	0	61	96.73	287	21.5	1	111105
uncut strip	18	12	13:00-14:00	Small	b-5-3	0.123	0.0514	0.82	372	1.51	6	1	2.84	32.37	31.59	32.35	386.49	385.96	31.683	32.636	62.87	64.76	499.8	0	53	96.73	287	21.5	0.7	111105
uncut strip	18	12	13:00-14:00	Small	b-5-3	0.123	0.0514	0.82	372	1.51	6	1	2.84	32.37	31.59	32.35	386.49	385.96	31.683	32.636	62.87	64.76	499.8	0	53	96.73	287	21.5	0.7	111105
uncut strip	18	12	13:00-14:00	Small	b-5-3	0.0858	0.0516	0.823	373	1.51	6	1	2.84	32.36	31.58	32.35	386.44	385.96	31.682	32.638	62.88	64.78	499.8	0	53	96.73	287	21.5	0.7	111105
uncut strip	18	12	13:00-14:00	Small	b-5-3	0.105	0.0516	0.822	373	1.51	6	1	2.84	32.36	31.58	32.35	386.46	385.95	31.685	32.639	62.89	64.78	499.9	0	53	96.73	287	21.5	0.7	111105
uncut strip	18	12	13:00-14:00	Small	b-5-3	0.166	0.051	0.812	371	1.5	6	1	2.84	32.36	31.57	32.35	386.45	385.87	31.683	32.626	62.9	64.77	499.9	0	54	96.73	287	21.5	0.7	111105
uncut strip	18	12	13:00-14:00	Small	b-5-3	0.121	0.0828	1.6	368	1.83	6	1	2.84	32.97	32.1	33.03	383.09	382.21	28.956	30.815	55.27	58.81	499.9	0	70	96.27	47.1	-0.0292	0.7	111105
uncut strip	18	12	13:00-14:00	Small	b-5-3	0.288	0.0825	1.59	365	1.83	6	1	2.84	32.97	32.09	33.03	383.1	382.03	28.956	30.806	55.27	58.8	499.9	0	70	96.27	47.1	-0.0292	0.7	111105
uncut strip	18	12	13:00-14:00	Small	b-5-3	0.329	0.0823	1.59	364	1.83	6	1	2.84	32.97	32.09	33.03	383.11	381.99	28.954	30.8	55.26	58.79	499.9	0	70	96.27	47.1	-0.0292	0.7	111105
uncut strip	18	12	13:00-14:00	Small	b-5-3	0.368	0.0819	1.58	363	1.83	6	1	2.84	32.97	32.08	33.03	383.11	381.94	28.953	30.789	55.27	58.77	499.9	0	70	96.27	47.1	-0.0292	0.7	111105
uncut strip	18	12	13:00-14:00	Small	b-5-3	0.41	0.0822	1.58	362	1.83	6	1	2.84	32.97	32.07	33.03	383.09	381.87	28.951	30.792	55.27	58.78	499.9	0	71	96.27	47.1	-0.0292	0.7	111105
uncut strip	18	23	14:30-15:30	Large	b-5-1	0.891	0.0982	1.99	365	1.93	6	1	2.84	34.21	32.79	34.18	394.61	392.6	29.485	31.796	52.51	56.62	499.9	0	25	96.26	47.1	-0.0292	0.3	111105
uncut strip	18	23	14:30-15:30	Large	b-5-1	0.84	0.0983	1.99	366	1.93	6	1	2.84	34.21	32.79	34.18	394.53	392.58	29.481	31.793	52.5	56.62	499.9	0	25	96.26	47.1	-0.0292	0.3	111105
uncut strip	18	23	14:30-15:30	Large	b-5-1	0.828	0.0981	1.99	366	1.93	6	1	2.84	34.21	32.78	34.18	394.41	392.48	29.475	31.782	52.47	56.58	499.9	0	25	96.26	47.1	-0.0292	0.3	111105
uncut strip	18	23	14:30-15:30	Large	b-5-1	0.807	0.0981	1.98	366	1.93	6	1	2.84	34.21	32.77	34.17	394.29	392.39	29.469	31.774	52.49	56.59	499.9	0	25	96.26	47.1	-0.0292	0.3	111105
uncut strip	18	23	14:30-15:30	Large	b-5-1	0.778	0.0979	1.98	367	1.93	6	1	2.84	34.2	32.77	34.17	394.12	392.25	29.461	31.762	52.5	56.6	499.9	0	26	96.26	47.1	-0.0292	0.3	111105
uncut strip	18	23	14:30-15:30	Large	b-5-1	1.45	0.0174	0.23	255	1.24	6	1	2.84	30.77	30.17	30.74	397.08	395.24	31.424	31.691	68.27	68.85	499.9	0	27	96.75	286	21	0.7	111105
uncut strip	18	23	14:30-15:30	Large	b-5-1	1.45	0.0174	0.23	255	1.24	6	1	2.84	30.77	30.17	30.74	397.08	395.24	31.424	31.691	68.27	68.85	499.9	0	27	96.75	286	21	0.7	111105
uncut strip	18	23	14:30-15:30	Large	b-5-1	1.42	0.0171	0.226	255	1.24	6	1	2.84	30.79	30.17	30.74	397	395.18	31.427	31.69	68.22	68.79	499.9	0	27	96.75	286	21	0.7	111105
uncut strip	18	23	14:30-15:30	Large	b-5-1	1.41	0.0171	0.226	255	1.24	6	1	2.84	30.79	30.17	30.74	396.87	395.07	31.426	31.688	68.21	68.78	499.9	0	27	96.75	286	21	0.7	111105
uncut strip	18	23	14:30-15:30	Large	b-5-1	1.54	0.0167	0.221	240	1.24	6	1	2.84	30.79	30.17	30.74	396.75	394.8	31.429	31.685	68.21	68.76	499.9	0	26	96.75	286	21	0.7	111105
uncut strip	18	19	14:30-15:30	Medium	b-5-2	1.48	0.0437	0.988	316	2.12	6	1	2.84	33.5	32.9	33.62	385.71	383.48	29.005	30.155	53.73	55.86	499.9	0	64	96.25	47.1	-0.0292	0.7	111105
uncut strip	18	19	14:30-15:30	Medium	b-5-2	1.5	0.0433	0.98	314	2.12	6	1	2.84	33.5	32.9	33.62	385.71	383.45	29.012	30.152	53.74	55.85	499.9	0	64	96.25	47.1	-0.0292	0.7	111105
uncut strip	18	19	14:30-15:30	Medium	b-5-2	1.54	0.0428	0.97	312	2.12	6	1	2.84	33.5	32.9	33.63	385.68	383.39	29.016	30.145	53.74	55.83	499.9	0	65	96.25	47.1	-0.0292	0.7	111105
uncut strip	18	19	14:30-15:30	Medium	b-5-2	1.58	0.0426	0.966	310	2.12	6	1	2.84	33.51	32.91	33.63	385.64	383.3	29.016	30.141	53.74	55.82	499.9	0	65	96.25	47.1	-0.0292	0.7	111105
uncut strip	18	19	14:30-15:30	Medium	b-5-2	1.55	0.0426	0.966	312	2.13	6	1	2.84	33.51	32.91	33.63	385.6	383.3	29.017	30.142	53.74	55.82	499.9	0	65	96.25	47.1	-0.0292	0.7	111105
uncut strip	18	19	14:30-15:30	Medium	b-5-2	2.7	0.009	0.123	-91.7	1.27	6	1	2.84	30.72	30.33	30.76	396.52	393.22	31.571	31.714	68.79	69.1	499.8	0	51	96.75	286	21	0.7	111105
uncut strip	18	19	14:30-15:30	Medium	b-5-2	2.7	0.009	0.123	-91.7	1.27	6	1	2.84	30.72	30.33	30.76	396.52	393.22	31.571	31.714	68.79	69.1	499.8	0	51	96.75	286	21	0.7	111105
uncut strip	18	19	14:30-15:30	Medium	b-5-2	2.77	0.00903	0.123	-102	1.27	6	1	2.84	30.72	30.33	30.76	396.57	393.18	31.569	31.712	68.78	69.1	499.8	0	51	96.75	286	21	0.7	111105
uncut strip	18	19	14:30-15:30	Medium	b-5-2	2.82	0.0089	0.121	-118	1.27	6	1	2.84	30.72	30.33	30.76	396.6	393.16	31.57	31.712	68.78	69.09	499.9	0	51	96.75	286	21	0.7	111105
uncut strip	18	19	14:30-15:30	Medium	b-5-2	2.9	0.00907	0.124	-123	1.27	6	1	2.84	30.73	30.33	30.76	396.65	393.11	31.567	31.71	68.76	69.08	499.9	0	51	96.75	286	21	0.7	111105
uncut strip	18	12	14:30-15:30	Small	b-5-3	0.993	0.0247	0.349	317	1.33	6	1	2.84	30.75	30.63	30.77	391.73	390.38	31.544	31.95	68.64	69.52	499.9	0	41	96.75	286	21	1	111105
uncut strip	18	12	14:30-15:30	Small	b-5-3	0.993	0.0247	0.349	317	1.33	6	1	2.84	30.75	30.63	30.77	391.73	390.38	31.544	31.95	68.64	69.52	499.9	0	41	96.75	286	21	1	111105
uncut strip	18	12	14:30-15:30	Small	b-5-3	0.974	0.0248	0.349	319	1.32	6	1	2.84	30.75	30.61	30.78	391.7	390.36	31.544	31.949	68.63	69.51	499.9	0	40	96.75	286	21	1	111105
uncut strip	18	12	14:30-15:30	Small	b-5-3	0.946	0.0249	0.35	321	1.32	6	1	2.84	30.75	30.59	30.78	391.63	390.33	31.542	31.949	68.63	69.51	499.9	0	40	96.75	286	21	0.7	111105
uncut strip	18	12	14:30-15:30	Small	b-5-3	0.911	0.0253	0.352	324	1.31	6	1	2.84	30.75	30.56	30.78	391.58	390.32	31.539	31.948	68.63	69.52	499.9	0	40	96.75	286	21	0.7	111105
uncut strip	18	12	14:30-15:30	Small	b-5-3	1.87	0.0731	1.53	329	1.98	6	1	2.84	33.46	32.53	33.5	386.49	383.54	28.787	30.564	53.44	56.74	499.9	0	43	96.25	47.1	-0.0292	0.7	111105
uncut strip	18	12	14:30-15:30	Small	b-5-3	1.87	0.0733	1.53	330	1.98	6	1	2.84	33.46	32.53	33.5	386.47	383.52	28.786	30.569	53.44	56.75	499.9	0	43	96.25	47.1	-0.0292	0.7	111105
uncut strip	18	12	14:30-15:30	Small	b-5-3	1.85	0.0731	1.53	330	1.98	6	1	2.84	33.46	32.53	33.5	386.47	383.55	28.787	30.566	53.43	56.74	499.9	0	43	96.25	47.1	-0.0292	0.7	111105
uncut strip	18	12	14:30-15:30	Small	b-5-3	1.98	0.0727	1.52	327	1.98	6	1	2.84	33.46	32.53	33.5	386.44	383.36	28.787	30.554	53.44	56.72	499.9	0	43	96.25	47.1	-0.0292	0.7	111105
uncut strip	18	12	14:30-15:30	Small	b-5-3	1.91	0.0726	1.52	328	1.98	6	1	2.84	33.46	32.52	33.5	386.4	383.42	28.784	30.547	53.44	56.72	499.9	0	43	96.25	47.1	-0.0292	0.7	111105
uncut strip	10	20	9:30-10:30	Large	b-3-1	0.171	0.086	1.24	393	1.38	6	1	2.84	31.21	30.76	31.29	406.33	405.52	30.26	31.699	64.19	67.24	499.9	0	91	96.85	291	21.2	0.7	111105
uncut strip	10	20	9:30-10:30	Large	b-3-1	0.171	0.086	1.24	393	1.38	6	1	2.84	31.21	30.76	31.29	406.33	405.52	30.26	31.699	64.19	67.24	499.9	0	91	96.85	291	21.2	0.7	111105
uncut strip	10	20	9:30-10:30	Large	b-3-1	0.118	0.086	1.24	394	1.38	6	1	2.84	31.21	30.76	31.29	406.26	405.52	30.259	31.697	64.19	67.24	499.9	0	91	96.85	291	21.2	0.7	111105
uncut strip	10	20	9:30-10:30	Large	b-3-1	0.136	0.0862	1.24	393	1.38	6	1	2.84	31.21	30.76	31.29	406.25	405.48	30.257	31.699	64.18	67.24	499.9	0	91	96.85	291	21.2	0.7	111105
uncut strip	10	20	9:30-10:30	Large	b-3-1	0.0667	0.0862	1.24	395	1.38	6	1	2.84	31.21	30.76	31.29	406.12	405.44	30.26	31.701	64.18	67.24	499.9	0	91	96.85	291	21.2	0.7	111105
uncut strip	10	19	9:30-10:30	Medium	b-3-2	1.56	0.0553	0.809	355	1.39	6	1	2.84	31.53	30.78	31.55	412.5	410.23	30.711	31.651	63.97	65.92	499.9	0	54	96.85	291	21.2	0.7	111105
uncut strip	10	19	9:30-10:30	Medium	b-3-2	1.48	0.0557	0.816	358	1.39	6	1	2.84	31.53	30.78	31.55	412.4	410.23	30.705	31.654	63.95	65.93	499.9	0	54	96.85	291	21.2	0.7	111105
uncut strip	10	19	9:30-10:30	Medium	b-3-2	1.48	0.0551	0.808	357	1.39	6	1	2.84	31.52	30.78	31.55	412.25	410.08	30.705	31.644	63.99	65.94	499.9	0	54	96.85	291	21.2	0.7	111105
uncut strip	10	19	9:30-10:30	Medium	b-3-2	1.47	0.0556	0.814	358	1.39	6	1	2.84	31.52	30.78	31.55	412.17	410	30.705	31.65	63.99	65.96	499.9	0	54	96.85	291	21.2	0.7	111105
uncut strip	10	19	9:30-10:30	Medium	b-3-2	1.42	0.056	0.818	359	1.39	6	1	2.84	31.53	30.77	31.55	412.07	409.96	30.7	31.65	63.96	65.94	499.9	0	54	96.85	291	21.2	0.7	111105
uncut strip	10	15	9:30-10:30	Small	b-3-3	2.2	0.0648	0.995	350	1.46	6	1	2.84	31.78	31.15	31.79	418.03	414.89	30.742	31.899	63.15	65.53	499.9	0	60	96.86	291	21.2	0.7	111105
uncut strip	10	15	9:30-10:30	Small	b-3-3	2.09	0.0648	0.994	353	1.46	6	1	2.84	31.78	31.14	31.79	417.87	414.86	30.74	31.896	63.14	65.51	499.9	0	60	96.86	291	21.2	0.7	111105
uncut strip	10	15	9:30-10:30	Small	b-3-3	2.09	0.0648	0.994	353	1.46	6	1	2.84	31.78	31.14	31.79	417.87	414.86	30.74	31.896	63.14	65.51	499.9	0	60	96.86	291	21.2	0.7	111105
uncut strip	10	15	9:30-10:30	Small	b-3-3	2.06	0.0645	0.99	353	1.46	6	1	2.84	31.79	31.14	31.79	417.54	414.57	30.739	31.889	63.1	65.47	499.9	0	60	96.86	291	21.2	0.7	111105
uncut strip	10	15	9:30-10:30	Small	b-3-3	1.84	0.0645	0.99	358	1.46	6	1	2.84	31.77	31.14	31.78	417.08	414.39	30.734	31.884	63.16	65.52	499.9	0	59	96.86	291	21.2	0.7	111105
uncut strip	10	20	11:00-12:00	Large	b-3-1	0.215	0.0391	1.21	343	2.9	6	1	2.84	36.09	35.01	36.24	370.12	369.33	27.104	28.52	43.55	45.83	499.9	0	77	96.36	4.73	0.512	0.7	111105
uncut strip	10	20	11:00-12:00	Large	b-3-1	0.189	0.039	1.21	344	2.9	6	1	2.84	36.08	35.01	36.24	370.11	369.35	27.107	28.52	43.56	45.83	499.9	0	77	96.36	4.73	0.512	0.7	111105
uncut strip	10	20	11:00-12:00	Large	b-3-1	0.207	0.0388	1.2	343	2.9	6	1	2.84	36.08	35	36.23	370.13	369.34	27.11	28.514	43.57	45.83	499.9	0	77	96.36	4.73	0.512	0.7	111105
uncut strip	10	20	11:00-12:00	Large	b-3-1	0.188	0.0388	1.2	344	2.9	6	1	2.84	36.08	34.99	36.23	370.12	369.36	27.109	28.513	43.57	45.83	499.9	0	77	96.36	4.73	0.512	0.7	111105
uncut strip	10	20	11:00-12:00	Large	b-3-1	0.191	0.0392	1.21	344	2.9	6	1	2.84	36.08	34.99	36.23	370.1	369.33	27.11	28.526	43.58	45.85	499.9	0	77	96.36	4.73	0.512	0.7	111105
uncut strip	10	20	11:00-12:00	Large	b-3-1	0.915	0.0618	1.42	356	2.17	6	1	2.84	34.74	34.16	34.73	395.75	393.98	31.567	33.215	54.93	57.79	499.9	0	95	96.85	291	21.8	0.3	111105
uncut strip	10	20	11:00-12:00	Large	b-3-1	0.915	0.0618	1.42	356	2.17	6	1	2.84	34.74	34.16	34.73	395.75	393.98	31.567	33.215	54.93	57.79	499.9	0	95	96.85	291	21.8	0.3	111105
uncut strip	10	20	11:00-12:00	Large	b-3-1	0.866	0.0618	1.42	357	2.17	6	1	2.84	34.74	34.16	34.73	395.71	393.99	31.563	33.211	54.9	57.77	499.8	0	96	96.85	291	21.8	0.7	111105
uncut strip	10	20	11:00-12:00	Large	b-3-1	0.902	0.0619	1.42	356	2.17	6	1	2.84	34.74	34.15	34.73	395.72	393.96	31.561	33.211	54.91	57.78	499.8	0	96	96.85	291	21.8	0.7	111105
uncut strip	10	20	11:00-12:00	Large	b-3-1	0.92	0.0622	1.43	356	2.17	6	1	2.84	34.74	34.13	34.73	395.72	393.95	31.552	33.206	54.9	57.77	499.8	0	95	96.85	291	21.8	0.7	111105
uncut strip	10	19	11:00-12:00	Medium	b-3-2	2.41	0.0461	1.6	277	3.25	6	1	2.84	37.84	36.3	38.01	384.24	380.62	27.426	29.293	40.04	42.77	499.9	0	53	96.36	2.44	0.458	0.7	111105
uncut strip	10	19	11:00-12:00	Medium	b-3-2	2.39	0.0463	1.61	279	3.24	6	1	2.84	37.84	36.3	38.01	384.31	380.71	27.428	29.302	40.04	42.78	499.9	0	52	96.36	2.44	0.458	0.7	111105
uncut strip	10	19	11:00-12:00	Medium	b-3-2	2.5	0.0466	1.62	275	3.24	6	1	2.84	37.84	36.3	38.01	384.4	380.66	27.428	29.314	40.05	42.81	499.9	0	52	96.36	2.44	0.458	0.7	111105
uncut strip	10	19	11:00-12:00	Medium	b-3-2	2.48	0.0467	1.62	276	3.25	6	1	2.84	37.84	36.31	38.01	384.47	380.75	27.427	29.318	40.05	42.81	499.9	0	51	96.36	2.44	0.458	1	111105
uncut strip	10	19	11:00-12:00	Medium	b-3-2	2.47	0.0465	1.62	276	3.25	6	1	2.84	37.83	36.33	38	384.6	380.9	27.429	29.315	40.07	42.82	499.9	0	51	96.36	2.44	0.458	1	111105
uncut strip	10	19	11:00-12:00	Medium	b-3-2	0.898	0.0678	1.42	364	1.99	6	1	2.84	34.19	33.56	34.28	400.41	398.65	31.697	33.343	56.85	59.81	499.9	0	96	96.85	291	21.8	0.7	111105
uncut strip	10	19	11:00-12:00	Medium	b-3-2	0.947	0.0679	1.42	363	1.98	6	1	2.84	34.19	33.56	34.28	400.35	398.53	31.697	33.346	56.85	59.81	499.9	0	96	96.85	291	21.8	0.7	111105
uncut strip	10	19	11:00-12:00	Medium	b-3-2	0.938	0.0676	1.42	363	1.99	6	1	2.84	34.19	33.57	34.28	400.28	398.48	31.698	33.34	56.85	59.8	499.9	0	95	96.85	291	21.8	0.7	111105
uncut strip	10	19	11:00-12:00	Medium	b-3-2	0.965	0.0676	1.42	362	1.99	6	1	2.84	34.19	33.57	34.28	400.21	398.38	31.698	33.341	56.86	59.8	499.9	0	95	96.85	291	21.8	0.7	111105
uncut strip	10	19	11:00-12:00	Medium	b-3-2	1.02	0.0678	1.42	361	1.99	6	1	2.84	34.19	33.57	34.28	400.07	398.17	31.697	33.345	56.85	59.81	499.9	0	95	96.85	291	21.8	0.7	111105
uncut strip	10	15	11:00-12:00	Small	b-3-3	0.175	0.0652	1.32	379	1.92	6	1	2.84	34.03	33.27	34.08	397.34	396.5	31.612	33.143	57.21	59.98	499.9	0	111	96.84	290	21.8	0.7	111105
uncut strip	10	15	11:00-12:00	Small	b-3-3	0.199	0.0652	1.32	379	1.92	6	1	2.84	34.03	33.27	34.08	397.29	396.43	31.612	33.143	57.21	59.98	500	0	111	96.84	290	21.8	0.7	111105
uncut strip	10	15	11:00-12:00	Small	b-3-3	0.216	0.0655	1.33	378	1.92	6	1	2.84	34.03	33.28	34.08	397.24	396.35	31.613	33.153	57.21	60	500	0	111	96.84	290	21.8	0.7	111105
uncut strip	10	15	11:00-12:00	Small	b-3-3	0.252	0.0657	1.33	377	1.92	6	1	2.84	34.03	33.29	34.08	397.22	396.28	31.612	33.159	57.21	60.01	500	0	111	96.84	290	21.8	0.7	111105
uncut strip	10	15	11:00-12:00	Small	b-3-3	0.287	0.0658	1.34	376	1.93	6	1	2.84	34.03	33.3	34.08	397.23	396.25	31.61	33.161	57.2	60.01	500	0	111	96.84	290	21.8	0.7	111105
uncut strip	10	15	11:00-12:00	Small	b-3-3	2.33	0.0448	1.72	263	3.57	6	1	2.84	38.56	37.36	38.81	370.19	366.63	27.629	29.631	38.79	41.61	499.9	0	103	96.37	2.44	0.458	1	111105
uncut strip	10	15	11:00-12:00	Small	b-3-3	2.3	0.0447	1.71	264	3.57	6	1	2.84	38.56	37.36	38.81	370.16	366.64	27.628	29.625	38.8	41.61	499.9	0	104	96.37	2.44	0.458	1	111105
uncut strip	10	15	11:00-12:00	Small	b-3-3	2.3	0.0445	1.71	263	3.58	6	1	2.84	38.56	37.37	38.81	370.2	366.69	27.622	29.614	38.79	41.59	499.9	0	103	96.37	2.44	0.458	0.7	111105
uncut strip	10	15	11:00-12:00	Small	b-3-3	2.19	0.0446	1.72	267	3.59	6	1	2.84	38.56	37.39	38.8	370.16	366.78	27.618	29.617	38.79	41.6	499.9	0	103	96.37	2.44	0.458	0.7	111105
uncut strip	10	15	11:00-12:00	Small	b-3-3	2.07	0.0446	1.72	272	3.59	6	1	2.84	38.56	37.41	38.8	370.18	366.94	27.616	29.621	38.78	41.59	499.9	0	102	96.37	2.44	0.458	0.7	111105
uncut strip	10	20	13:00-14:00	Large	b-3-1	0.533	0.026	0.812	313	2.91	6	1	2.84	35.47	35.2	35.5	364.27	363.28	28.161	29.108	46.78	48.35	499.9	0	407	96.29	2.71	0.729	0.7	111105
uncut strip	10	20	13:00-14:00	Large	b-3-1	0.59	0.0265	0.826	310	2.9	6	1	2.84	35.47	35.16	35.5	364.28	363.21	28.149	29.111	46.77	48.36	499.9	0	450	96.29	2.71	0.729	0.7	111105
uncut strip	10	20	13:00-14:00	Large	b-3-1	0.748	0.0264	0.82	301	2.89	6	1	2.84	35.46	35.14	35.5	364.26	363.01	28.14	29.095	46.76	48.35	499.9	0	469	96.29	2.71	0.729	0.7	111105
uncut strip	10	20	13:00-14:00	Large	b-3-1	1.04	0.0268	0.833	284	2.88	6	1	2.84	35.46	35.12	35.5	364.09	362.48	28.109	29.079	46.71	48.33	499.9	0	393	96.29	2.71	0.729	0.7	111105
uncut strip	10	20	13:00-14:00	Large	b-3-1	1.01	0.0267	0.83	285	2.89	6	1	2.84	35.46	35.12	35.5	364.06	362.49	28.107	29.075	46.71	48.32	499.9	0	393	96.29	2.71	0.729	0.7	111105
uncut strip	10	20	13:00-14:00	Large	b-3-1	1.03	0.0265	0.824	283	2.89	6	1	2.84	35.46	35.14	35.5	364.04	362.44	28.103	29.064	46.7	48.29	499.9	0	398	96.29	2.71	0.729	0.7	111105
uncut strip	10	20	13:00-14:00	Large	b-3-1	1.09	0.0263	0.819	279	2.89	6	1	2.84	35.46	35.14	35.5	364.05	362.39	28.102	29.057	46.7	48.28	499.9	0	398	96.3	2.71	0.729	0.7	111105
uncut strip	10	20	13:00-14:00	Large	b-3-1	1	0.0264	0.823	285	2.9	6	1	2.84	35.47	35.14	35.5	364.01	362.45	28.096	29.056	46.68	48.27	499.9	0	406	96.3	2.71	0.729	0.7	111105
uncut strip	10	20	13:00-14:00	Large	b-3-1	0.366	0.0309	0.672	361	2.03	6	1	2.84	34.24	33.54	34.23	394.06	393.3	32.003	32.783	57.2	58.59	499.9	0	85	96.8	291	21.3	0.7	111105
uncut strip	10	20	13:00-14:00	Large	b-3-1	0.334	0.0311	0.675	363	2.03	6	1	2.84	34.25	33.54	34.23	394.11	393.39	32.003	32.786	57.19	58.59	499.9	0	85	96.8	291	21.3	0.7	111105
uncut strip	10	20	13:00-14:00	Large	b-3-1	0.269	0.0311	0.676	366	2.03	6	1	2.84	34.26	33.54	34.23	394.12	393.48	32.004	32.788	57.16	58.56	499.9	0	85	96.8	291	21.3	0.7	111105
uncut strip	10	20	13:00-14:00	Large	b-3-1	0.372	0.031	0.673	361	2.03	6	1	2.84	34.25	33.54	34.23	394.2	393.43	32.004	32.785	57.17	58.57	499.9	0	84	96.8	291	21.3	0.7	111105
uncut strip	10	20	13:00-14:00	Large	b-3-1	0.302	0.0314	0.681	365	2.03	6	1	2.84	34.24	33.54	34.23	394.29	393.6	32.001	32.792	57.2	58.62	499.9	0	84	96.8	291	21.3	0.7	111105
uncut strip	10	19	13:00-14:00	Medium	b-3-2	0.915	0.0311	0.907	299	2.72	6	1	2.84	35.25	34.62	35.28	363.42	361.93	28.152	29.208	47.32	49.1	499.9	0	110	96.29	2.71	0.729	1	111105
uncut strip	10	19	13:00-14:00	Medium	b-3-2	0.823	0.0312	0.91	304	2.72	6	1	2.84	35.26	34.63	35.29	363.39	362.01	28.15	29.21	47.29	49.08	499.9	0	112	96.29	2.71	0.729	1	111105
uncut strip	10	19	13:00-14:00	Medium	b-3-2	0.806	0.0312	0.911	305	2.72	6	1	2.84	35.28	34.62	35.29	363.42	362.06	28.149	29.21	47.26	49.04	499.9	0	112	96.29	2.71	0.729	1	111105
uncut strip	10	19	13:00-14:00	Medium	b-3-2	0.803	0.031	0.906	305	2.72	6	1	2.84	35.28	34.62	35.29	363.44	362.08	28.148	29.203	47.25	49.02	499.9	0	112	96.29	2.71	0.729	1	111105
uncut strip	10	19	13:00-14:00	Medium	b-3-2	0.826	0.0313	0.913	304	2.72	6	1	2.84	35.28	34.61	35.29	363.44	362.05	28.148	29.211	47.26	49.04	499.9	0	111	96.29	2.71	0.729	1	111105
uncut strip	10	19	13:00-14:00	Medium	b-3-2	3.01	0.03	0.612	222	1.91	6	1	2.84	34.09	33.19	34.05	398.02	394.12	32.297	33.007	58.22	59.5	499.9	0	114	96.79	291	21.3	0.7	111105
uncut strip	10	19	13:00-14:00	Medium	b-3-2	3.01	0.03	0.612	222	1.91	6	1	2.84	34.09	33.19	34.05	398.02	394.12	32.297	33.007	58.22	59.5	499.9	0	114	96.79	291	21.3	0.7	111105
uncut strip	10	19	13:00-14:00	Medium	b-3-2	2.84	0.0298	0.608	230	1.91	6	1	2.84	34.09	33.2	34.05	398	394.3	32.298	33.004	58.21	59.48	499.9	0	114	96.79	291	21.3	0.7	111105
uncut strip	10	19	13:00-14:00	Medium	b-3-2	2.41	0.0296	0.606	253	1.91	6	1	2.84	34.1	33.2	34.05	397.85	394.67	32.304	33.007	58.2	59.46	499.9	0	114	96.79	291	21.3	0.7	111105
uncut strip	10	19	13:00-14:00	Medium	b-3-2	1.86	0.0291	0.596	281	1.91	6	1	2.84	34.1	33.2	34.06	397.49	394.97	32.309	33.001	58.19	59.43	499.9	0	114	96.79	291	21.3	0.7	111105
uncut strip	10	15	13:00-14:00	Small	b-3-3	0.0636	0.0725	1.4	372	1.83	6	1	2.84	33.99	33.14	33.99	386.44	385.72	32.106	33.725	58.19	61.13	499.9	0	87	96.79	288	22.1	1	111105
uncut strip	10	15	13:00-14:00	Small	b-3-3	0.0636	0.0725	1.4	372	1.83	6	1	2.84	33.99	33.14	33.99	386.44	385.72	32.106	33.725	58.19	61.13	499.9	0	87	96.79	288	22.1	1	111105
uncut strip	10	15	13:00-14:00	Small	b-3-3	0.096	0.0727	1.4	372	1.83	6	1	2.84	33.99	33.14	33.99	386.45	385.69	32.105	33.726	58.2	61.14	499.9	0	87	96.79	288	22.1	1	111105
uncut strip	10	15	13:00-14:00	Small	b-3-3	0.119	0.0725	1.39	371	1.83	6	1	2.84	33.99	33.14	33.99	386.49	385.7	32.106	33.724	58.2	61.13	499.9	0	87	96.79	288	22.1	1	111105
uncut strip	10	15	13:00-14:00	Small	b-3-3	0.0751	0.0721	1.39	372	1.83	6	1	2.84	33.99	33.13	33.99	386.48	385.75	32.106	33.714	58.18	61.1	499.9	0	87	96.79	288	22.1	1	111105
uncut strip	10	15	13:00-14:00	Small	b-3-3	3.06	0.0548	1.67	254	2.86	6	1	2.84	35.21	35.35	35.23	364.04	359.65	28.156	30.103	47.46	50.74	499.9	0	873	96.29	2.71	0.729	0.7	111105
uncut strip	10	15	13:00-14:00	Small	b-3-3	3	0.0553	1.67	256	2.83	6	1	2.84	35.2	35.26	35.23	364.05	359.72	28.158	30.102	47.46	50.74	499.9	0	803	96.29	2.71	0.729	0.7	111105
uncut strip	10	15	13:00-14:00	Small	b-3-3	2.9	0.0555	1.66	260	2.8	6	1	2.84	35.2	35.15	35.23	364.03	359.83	28.163	30.092	47.47	50.72	499.9	0	725	96.29	2.71	0.729	0.7	111105
uncut strip	10	15	13:00-14:00	Small	b-3-3	2.92	0.0559	1.65	260	2.76	6	1	2.84	35.2	35.04	35.23	363.99	359.78	28.168	30.085	47.48	50.71	499.9	0	713	96.29	2.71	0.729	0.7	111105
uncut strip	10	15	13:00-14:00	Small	b-3-3	2.76	0.0562	1.64	265	2.74	6	1	2.84	35.2	34.95	35.23	363.98	359.96	28.171	30.077	47.49	50.7	499.9	0	722	96.29	2.71	0.729	0.7	111105
uncut strip	10	20	14:30-15:30	Large	b-3-1	0.21	0.0484	0.955	383	1.86	6	1	2.84	32.72	32.01	32.72	403.39	402.68	29.229	30.341	56.58	58.73	499.9	0	46	96.27	47.1	-0.0292	0.7	111105
uncut strip	10	20	14:30-15:30	Large	b-3-1	0.219	0.0483	0.954	383	1.86	6	1	2.84	32.73	32.01	32.73	403.37	402.65	29.227	30.337	56.55	58.7	499.9	0	46	96.27	47.1	-0.0292	0.7	111105
uncut strip	10	20	14:30-15:30	Large	b-3-1	0.162	0.0483	0.954	385	1.86	6	1	2.84	32.73	32.01	32.73	403.33	402.67	29.223	30.334	56.53	58.68	499.9	0	46	96.27	47.1	-0.0292	0.7	111105
uncut strip	10	20	14:30-15:30	Large	b-3-1	0.202	0.0476	0.941	383	1.86	6	1	2.84	32.74	32.01	32.73	403.3	402.61	29.224	30.319	56.5	58.62	499.9	0	46	96.27	47.1	-0.0292	0.7	111105
uncut strip	10	20	14:30-15:30	Large	b-3-1	0.374	0.0476	0.944	377	1.86	6	1	2.84	32.75	32.03	32.74	403.32	402.42	29.222	30.32	56.47	58.59	499.9	0	46	96.27	47.1	-0.0292	0.7	111105
uncut strip	10	20	14:30-15:30	Large	b-3-1	0.432	0.0367	0.62	364	1.59	6	1	2.84	31.91	31.41	32.01	393.92	393.1	30.588	31.308	62.3	63.77	499.9	0	40	96.79	290	21	0.7	111105
uncut strip	10	20	14:30-15:30	Large	b-3-1	0.432	0.0367	0.62	364	1.59	6	1	2.84	31.91	31.41	32.01	393.92	393.1	30.588	31.308	62.3	63.77	499.9	0	40	96.79	290	21	0.7	111105
uncut strip	10	20	14:30-15:30	Large	b-3-1	0.406	0.0366	0.618	365	1.59	6	1	2.84	31.91	31.41	32.01	393.95	393.17	30.588	31.307	62.3	63.77	499.9	0	41	96.79	290	21	0.7	111105
uncut strip	10	20	14:30-15:30	Large	b-3-1	0.395	0.0366	0.617	365	1.59	6	1	2.84	31.91	31.41	32.01	393.97	393.2	30.589	31.306	62.3	63.76	499.9	0	41	96.79	290	21	0.7	111105
uncut strip	10	20	14:30-15:30	Large	b-3-1	0.433	0.0366	0.617	364	1.59	6	1	2.84	31.92	31.41	32.01	393.98	393.17	30.587	31.304	62.29	63.76	500	0	41	96.79	290	21	0.7	111105
uncut strip	10	19	14:30-15:30	Medium	b-3-2	4.29	0.0739	1.41	296	1.81	6	1	2.84	32.88	32.64	32.92	407.59	401.77	31.016	32.654	59.49	62.63	499.9	0	502	96.26	47.1	-0.0292	0.7	111105
uncut strip	10	19	14:30-15:30	Medium	b-3-2	4.25	0.0738	1.41	297	1.81	6	1	2.84	32.88	32.65	32.92	407.57	401.79	31.019	32.659	59.49	62.64	499.9	0	512	96.26	47.1	-0.0292	0.7	111105
uncut strip	10	19	14:30-15:30	Medium	b-3-2	4.25	0.0738	1.41	297	1.81	6	1	2.84	32.88	32.65	32.92	407.57	401.79	31.019	32.659	59.49	62.64	499.9	0	512	96.26	47.1	-0.0292	0.7	111105
uncut strip	10	19	14:30-15:30	Medium	b-3-2	4.17	0.0734	1.41	298	1.81	6	1	2.84	32.89	32.66	32.92	407.52	401.83	31.021	32.655	59.48	62.62	499.9	0	534	96.26	47.1	-0.0292	0.7	111105
uncut strip	10	19	14:30-15:30	Medium	b-3-2	4.09	0.0739	1.42	300	1.81	6	1	2.84	32.89	32.67	32.92	407.46	401.87	31.019	32.663	59.47	62.63	499.9	0	538	96.27	47.1	-0.0292	0.7	111105
uncut strip	10	19	14:30-15:30	Medium	b-3-2	0.144	0.0365	0.619	371	1.6	6	1	2.84	31.86	31.43	31.92	388.48	388.02	30.547	31.267	62.4	63.87	499.8	0	33	96.76	288	21.1	1	111105
uncut strip	10	19	14:30-15:30	Medium	b-3-2	0.144	0.0365	0.619	371	1.6	6	1	2.84	31.86	31.43	31.92	388.48	388.02	30.547	31.267	62.4	63.87	499.8	0	33	96.76	288	21.1	1	111105
uncut strip	10	19	14:30-15:30	Medium	b-3-2	0.126	0.0367	0.623	372	1.6	6	1	2.84	31.86	31.43	31.92	388.51	388.06	30.545	31.27	62.39	63.87	499.8	0	33	96.76	288	21.1	0.7	111105
uncut strip	10	19	14:30-15:30	Medium	b-3-2	0.149	0.0367	0.622	371	1.6	6	1	2.84	31.86	31.43	31.92	388.58	388.12	30.547	31.27	62.4	63.87	499.9	0	33	96.76	288	21.1	0.7	111105
uncut strip	10	19	14:30-15:30	Medium	b-3-2	0.156	0.0367	0.622	371	1.6	6	1	2.84	31.86	31.43	31.92	388.67	388.2	30.546	31.269	62.39	63.87	499.9	0	33	96.76	288	21.1	0.7	111105
uncut strip	10	15	14:30-15:30	Small	b-3-3	0.172	0.0542	0.875	374	1.53	6	1	2.84	31.82	31.26	31.88	389.48	388.86	30.498	31.515	62.42	64.5	499.9	0	42	96.75	288	21.1	0.7	111105
uncut strip	10	15	14:30-15:30	Small	b-3-3	0.172	0.0542	0.875	374	1.53	6	1	2.84	31.82	31.26	31.88	389.48	388.86	30.498	31.515	62.42	64.5	499.9	0	42	96.75	288	21.1	0.7	111105
uncut strip	10	15	14:30-15:30	Small	b-3-3	0.162	0.0542	0.876	374	1.53	6	1	2.84	31.82	31.26	31.88	389.51	388.91	30.501	31.519	62.42	64.51	499.9	0	42	96.75	288	21.1	0.7	111105
uncut strip	10	15	14:30-15:30	Small	b-3-3	0.219	0.0545	0.88	372	1.53	6	1	2.84	31.82	31.27	31.88	389.6	388.93	30.501	31.524	62.42	64.52	499.9	0	42	96.75	288	21.1	0.7	111105
uncut strip	10	15	14:30-15:30	Small	b-3-3	0.276	0.0547	0.884	371	1.53	6	1	2.84	31.82	31.27	31.88	389.66	388.92	30.504	31.532	62.43	64.53	499.9	0	42	96.75	288	21.1	0.7	111105
uncut strip	10	15	14:30-15:30	Small	b-3-3	6.41	0.134	2.66	305	1.91	6	1	2.84	33.24	33.35	33.2	405.15	396.19	30.634	33.714	57.59	63.38	499.9	0	746	96.26	47.1	-0.0292	0.7	111105
uncut strip	10	15	14:30-15:30	Small	b-3-3	6.44	0.134	2.65	304	1.91	6	1	2.84	33.24	33.36	33.2	405.15	396.16	30.632	33.701	57.58	63.35	499.9	0	746	96.26	47.1	-0.0292	0.7	111105
uncut strip	10	15	14:30-15:30	Small	b-3-3	6.53	0.132	2.62	302	1.91	6	1	2.84	33.24	33.36	33.21	405.22	396.14	30.63	33.665	57.57	63.27	499.9	0	747	96.26	47.1	-0.0292	0.3	111105
uncut strip	10	15	14:30-15:30	Small	b-3-3	6.55	0.13	2.58	301	1.92	6	1	2.84	33.25	33.36	33.21	405.28	396.2	30.627	33.624	57.55	63.18	499.9	0	749	96.26	47.1	-0.0292	0.3	111105
uncut strip	10	15	14:30-15:30	Small	b-3-3	6.89	0.126	2.53	294	1.93	6	1	2.84	33.25	33.36	33.21	405.53	396.07	30.618	33.551	57.52	63.03	499.9	0	752	96.26	47.1	-0.0292	0.3	111105
Control		20	9:30-10:30	Large	d-1	0.189	-0.00854	-0.123	427	1.34	6	1	2.84	30.91	30.24	30.87	401.79	401.62	31.014	30.871	66.77	66.46	499.9	0	103	96.64	290	20.4	1	111105
Control		20	9:30-10:30	Large	d-1	0.189	-0.00854	-0.123	427	1.34	6	1	2.84	30.91	30.24	30.87	401.79	401.62	31.014	30.871	66.77	66.46	499.9	0	103	96.64	290	20.4	1	111105
Control		20	9:30-10:30	Large	d-1	0.13	-0.00865	-0.125	416	1.34	6	1	2.84	30.92	30.25	30.88	401.83	401.74	31.017	30.872	66.76	66.45	499.9	0	103	96.64	290	20.4	1	111105
Control		20	9:30-10:30	Large	d-1	0.0955	-0.0087	-0.126	410	1.34	6	1	2.84	30.93	30.25	30.88	401.84	401.79	31.016	30.87	66.73	66.41	499.9	0	103	96.64	290	20.4	1	111105
Control		20	9:30-10:30	Large	d-1	-0.0106	-0.0091	-0.131	391	1.34	6	1	2.84	30.92	30.24	30.88	401.81	401.88	31.014	30.861	66.73	66.41	499.9	0	103	96.64	290	20.4	1	111105
Control		15	9:30-10:30	Medium	d-2	0.169	-0.00347	-0.0507	466	1.36	6	1	2.84	30.87	30.35	30.84	398.44	398.26	31.022	30.963	66.94	66.81	499.9	0	94	96.64	290	20.4	0.3	111105
Control		15	9:30-10:30	Medium	d-2	0.169	-0.00347	-0.0507	466	1.36	6	1	2.84	30.87	30.35	30.84	398.44	398.26	31.022	30.963	66.94	66.81	499.9	0	94	96.64	290	20.4	0.3	111105
Control		15	9:30-10:30	Medium	d-2	0.167	-0.00328	-0.048	469	1.36	6	1	2.84	30.88	30.36	30.85	398.45	398.27	31.022	30.966	66.9	66.78	499.9	0	96	96.64	290	20.4	0.3	111105
Control		15	9:30-10:30	Medium	d-2	0.209	-0.00301	-0.0439	499	1.36	6	1	2.84	30.88	30.36	30.85	398.45	398.22	31.022	30.971	66.91	66.8	499.9	0	98	96.64	290	20.4	0.3	111105
Control		15	9:30-10:30	Medium	d-2	0.159	-0.00278	-0.0407	479	1.36	6	1	2.84	30.9	30.37	30.86	398.46	398.29	31.023	30.975	66.83	66.72	499.9	0	102	96.64	290	20.4	0.3	111105
Control		15	9:30-10:30	Small	d-3	0.902	0.025	0.361	334	1.35	6	1	2.84	30.84	30.51	30.88	402.32	401.06	30.981	31.401	66.99	67.9	499.9	0	75	96.64	290	20.4	0.7	111105
Control		15	9:30-10:30	Small	d-3	0.902	0.025	0.361	334	1.35	6	1	2.84	30.84	30.51	30.88	402.32	401.06	30.981	31.401	66.99	67.9	499.9	0	75	96.64	290	20.4	0.7	111105
Control		15	9:30-10:30	Small	d-3	0.927	0.0248	0.357	332	1.35	6	1	2.84	30.84	30.51	30.88	402.28	401	30.98	31.396	66.98	67.88	499.9	0	75	96.64	290	20.4	0.7	111105
Control		15	9:30-10:30	Small	d-3	0.925	0.0241	0.348	331	1.35	6	1	2.84	30.84	30.5	30.88	402.27	400.99	30.977	31.382	66.97	67.85	499.9	0	75	96.64	290	20.4	0.7	111105
Control		15	9:30-10:30	Small	d-3	0.952	0.0237	0.341	328	1.35	6	1	2.84	30.84	30.49	30.88	402.2	400.89	30.972	31.368	66.96	67.81	499.9	0	74	96.64	290	20.4	0.7	111105
Control		20	11:00-12:00	Large	d-1	-1.35	0.0288	0.635	426	2.06	6	1	2.84	32.97	32.09	32.98	363.86	365.2	27.8	28.541	52.98	54.4	499.9	0	26	96.13	3.78	0.765	0.3	111105
Control		20	11:00-12:00	Large	d-1	-1.35	0.0288	0.635	426	2.06	6	1	2.84	32.97	32.09	32.98	363.86	365.2	27.8	28.541	52.98	54.4	499.9	0	26	96.13	3.78	0.765	0.3	111105
Control		20	11:00-12:00	Large	d-1	-1.37	0.029	0.639	427	2.05	6	1	2.84	32.97	32.08	32.98	363.82	365.18	27.796	28.541	52.97	54.39	499.9	0	25	96.13	3.78	0.765	0.3	111105
Control		20	11:00-12:00	Large	d-1	-1.33	0.0291	0.64	425	2.05	6	1	2.84	32.98	32.07	32.98	363.83	365.14	27.792	28.539	52.95	54.37	499.9	0	24	96.13	3.78	0.765	0.3	111105
Control		20	11:00-12:00	Large	d-1	-1.29	0.0292	0.641	423	2.05	6	1	2.84	32.99	32.06	32.99	363.83	365.1	27.788	28.535	52.91	54.33	499.9	0	22	96.13	3.78	0.765	0.3	111105
Control		15	11:00-12:00	Medium	d-2	0.0883	0.0501	1.12	348	2.1	6	1	2.84	32.87	32.41	32.93	364.15	363.56	27.679	28.985	53.07	55.57	499.9	0	75	96.13	3.78	0.765	0.7	111105
Control		15	11:00-12:00	Medium	d-2	0.13	0.0488	1.09	346	2.1	6	1	2.84	32.87	32.42	32.93	364.14	363.51	27.686	28.961	53.08	55.52	499.9	0	75	96.13	3.78	0.765	0.7	111105
Control		15	11:00-12:00	Medium	d-2	0.163	0.0463	1.04	345	2.11	6	1	2.84	32.86	32.41	32.93	364	363.35	27.705	28.918	53.12	55.45	499.9	0	76	96.13	3.78	0.765	0.7	111105
Control		15	11:00-12:00	Medium	d-2	0.193	0.0461	1.04	344	2.11	6	1	2.84	32.86	32.41	32.93	364.02	363.33	27.706	28.913	53.12	55.44	499.9	0	76	96.13	3.78	0.765	0.7	111105
Control		15	11:00-12:00	Medium	d-2	0.0983	0.0455	1.02	347	2.11	6	1	2.84	32.86	32.42	32.93	363.95	363.38	27.712	28.906	53.14	55.42	499.9	0	75	96.13	3.78	0.765	0.7	111105
Control		15	11:00-12:00	Small	d-3	0.705	0.0543	1.24	330	2.16	6	1	2.84	32.92	32.53	32.96	365.02	363.63	27.292	28.744	52.18	54.95	499.9	0	74	96.13	3.78	0.765	0.7	111105
Control		15	11:00-12:00	Small	d-3	0.661	0.0538	1.23	331	2.16	6	1	2.84	32.92	32.53	32.97	365.04	363.7	27.292	28.731	52.17	54.92	499.9	0	70	96.13	3.78	0.765	0.7	111105
Control		15	11:00-12:00	Small	d-3	0.612	0.0534	1.23	332	2.16	6	1	2.84	32.92	32.53	32.97	365.01	363.74	27.29	28.721	52.17	54.91	499.9	0	68	96.13	3.78	0.765	0.7	111105
Control		15	11:00-12:00	Small	d-3	0.583	0.0537	1.23	333	2.16	6	1	2.84	32.92	32.52	32.97	364.95	363.71	27.289	28.724	52.17	54.91	499.9	0	63	96.13	3.78	0.765	0.7	111105
Control		15	11:00-12:00	Small	d-3	0.577	0.0536	1.23	333	2.15	6	1	2.84	32.92	32.51	32.97	364.93	363.7	27.29	28.72	52.17	54.91	499.9	0	62	96.13	3.78	0.765	0.7	111105
Control		20	13:00-14:00	Large	d-1	1.1	0.0304	0.462	325	1.42	6	1	2.84	32.05	31.46	32	393.46	391.92	32.664	33.2	65.91	66.99	499.9	0	126	96.64	288	21.4	0.7	111105
Control		20	13:00-14:00	Large	d-1	1.04	0.0304	0.461	328	1.42	6	1	2.84	32.05	31.45	32.01	393.4	391.93	32.664	33.199	65.91	66.99	499.9	0	127	96.64	288	21.4	0.7	111105
Control		20	13:00-14:00	Large	d-1	0.983	0.0297	0.45	330	1.42	6	1	2.84	32.05	31.45	32.01	393.42	392.03	32.67	33.192	65.94	67	499.9	0	127	96.64	288	21.4	0.7	111105
Control		20	13:00-14:00	Large	d-1	0.941	0.0299	0.452	332	1.42	6	1	2.84	32.04	31.44	32	393.41	392.07	32.666	33.191	65.97	67.02	499.9	0	128	96.64	288	21.4	0.7	111105
Control		20	13:00-14:00	Large	d-1	0.806	0.0305	0.46	341	1.42	6	1	2.84	32.06	31.44	32.01	393.38	392.19	32.666	33.201	65.9	66.98	499.9	0	129	96.64	288	21.4	0.7	111105
Control		20	13:00-14:00	Large	d-1	2.72	0.0257	0.414	235	1.5	6	1	2.84	32.21	31.54	32.23	417.53	414.07	32.123	32.603	64.17	65.13	499.9	0	61	96.54	295	21.4	0.7	111105
Control		20	13:00-14:00	Large	d-1	2.73	0.0259	0.416	236	1.5	6	1	2.84	32.21	31.53	32.23	417.51	414.03	32.124	32.606	64.17	65.13	499.9	0	61	96.54	295	21.4	0.7	111105
Control		20	13:00-14:00	Large	d-1	2.72	0.0261	0.419	238	1.5	6	1	2.84	32.21	31.53	32.23	417.54	414.08	32.126	32.612	64.18	65.16	499.9	0	61	96.54	295	21.4	0.7	111105
Control		20	13:00-14:00	Large	d-1	2.73	0.0258	0.414	235	1.5	6	1	2.84	32.21	31.53	32.23	417.57	414.08	32.128	32.609	64.19	65.15	499.9	0	61	96.54	295	21.4	0.7	111105
Control		20	13:00-14:00	Large	d-1	2.74	0.0258	0.415	235	1.5	6	1	2.84	32.22	31.53	32.23	417.56	414.07	32.129	32.611	64.15	65.12	499.9	0	61	96.54	295	21.4	0.7	111105
Control		15	13:00-14:00	Medium	d-2	0.337	0.03	0.451	360	1.41	6	1	2.84	32.27	31.52	32.19	388.31	387.69	32.998	33.521	65.78	66.82	499.9	0	89	96.64	288	21.4	0.7	111105
Control		15	13:00-14:00	Medium	d-2	0.337	0.03	0.451	360	1.41	6	1	2.84	32.27	31.52	32.19	388.31	387.69	32.998	33.521	65.78	66.82	499.9	0	89	96.64	288	21.4	0.7	111105
Control		15	13:00-14:00	Medium	d-2	0.311	0.0294	0.441	362	1.41	6	1	2.84	32.27	31.51	32.19	388.4	387.82	33.001	33.512	65.78	66.8	499.9	0	89	96.64	288	21.4	0.7	111105
Control		15	13:00-14:00	Medium	d-2	0.259	0.0295	0.443	365	1.41	6	1	2.84	32.28	31.51	32.19	388.52	388	33	33.514	65.74	66.76	499.9	0	89	96.64	288	21.4	0.7	111105
Control		15	13:00-14:00	Medium	d-2	0.173	0.0291	0.438	369	1.41	6	1	2.84	32.29	31.52	32.2	388.65	388.24	32.995	33.503	65.69	66.7	499.9	0	89	96.64	288	21.4	0.7	111105
Control		15	13:00-14:00	Medium	d-2	0.133	0.0557	0.883	385	1.5	6	1	2.84	32.29	31.66	32.35	399.56	398.98	31.985	33.01	63.63	65.67	499.9	0	52	96.54	292	21.8	0.7	111105
Control		15	13:00-14:00	Medium	d-2	0.117	0.0554	0.88	385	1.5	6	1	2.84	32.29	31.66	32.35	399.56	398.99	31.988	33.009	63.63	65.66	499.9	0	52	96.54	292	21.8	0.7	111105
Control		15	13:00-14:00	Medium	d-2	0.117	0.0554	0.88	385	1.5	6	1	2.84	32.29	31.66	32.35	399.56	398.99	31.988	33.009	63.63	65.66	499.9	0	52	96.54	292	21.8	0.7	111105
Control		15	13:00-14:00	Medium	d-2	0.176	0.0554	0.879	384	1.5	6	1	2.84	32.29	31.66	32.35	399.66	399.03	31.987	33.008	63.63	65.66	499.9	0	52	96.54	292	21.8	0.7	111105
Control		15	13:00-14:00	Medium	d-2	0.0956	0.0554	0.88	386	1.5	6	1	2.84	32.29	31.67	32.35	399.64	399.1	31.987	33.008	63.62	65.66	499.9	0	52	96.54	292	21.8	0.7	111105
Control		15	13:00-14:00	Small	d-3	0.129	-0.0119	-0.216	400	1.67	6	1	2.84	32.44	31.93	32.5	394.51	394.46	32.19	31.94	63.49	63	499.9	0	48	96.53	291	20.6	0.7	111105
Control		15	13:00-14:00	Small	d-3	0.118	-0.012	-0.218	399	1.67	6	1	2.84	32.44	31.93	32.5	394.58	394.54	32.194	31.941	63.5	63	499.9	0	48	96.53	291	20.6	0.7	111105
Control		15	13:00-14:00	Small	d-3	0.118	-0.012	-0.218	399	1.67	6	1	2.84	32.44	31.93	32.5	394.58	394.54	32.194	31.941	63.5	63	499.9	0	48	96.53	291	20.6	0.7	111105
Control		15	13:00-14:00	Small	d-3	0.174	-0.0117	-0.212	407	1.67	6	1	2.84	32.44	31.93	32.5	394.73	394.62	32.198	31.952	63.5	63.02	499.9	0	47	96.53	291	20.6	0.7	111105
Control		15	13:00-14:00	Small	d-3	0.235	-0.0121	-0.219	414	1.67	6	1	2.84	32.44	31.92	32.5	394.86	394.68	32.203	31.948	63.51	63.01	499.9	0	47	96.53	291	20.6	0.7	111105
Control		15	13:00-14:00	Small	d-3	2.69	0.0308	0.473	247	1.44	6	1	2.84	32.33	31.68	32.29	399.35	395.9	33.1	33.649	65.77	66.86	499.8	0	80	96.63	288	21.4	1	111105
Control		15	13:00-14:00	Small	d-3	2.59	0.0312	0.479	254	1.44	6	1	2.84	32.33	31.68	32.29	399.27	395.93	33.097	33.652	65.75	66.85	499.8	0	80	96.63	288	21.4	0.7	111105
Control		15	13:00-14:00	Small	d-3	2.61	0.0307	0.47	251	1.44	6	1	2.84	32.33	31.68	32.29	399.2	395.84	33.095	33.641	65.74	66.83	499.8	0	80	96.63	288	21.4	0.7	111105
Control		15	13:00-14:00	Small	d-3	2.49	0.0312	0.478	259	1.44	6	1	2.84	32.33	31.68	32.29	399.12	395.91	33.092	33.646	65.72	66.82	499.8	0	79	96.63	288	21.4	0.7	111105
Control		15	13:00-14:00	Small	d-3	2.35	0.0311	0.478	266	1.44	6	1	2.84	32.34	31.68	32.29	398.91	395.87	33.087	33.641	65.69	66.79	499.9	0	77	96.63	288	21.4	0.7	111105
Control		20	14:30-15:30	Large	d-1	0.542	0.0633	1.26	371	1.88	6	1	2.84	32.99	32.16	33.04	398.67	397.42	29.051	30.523	55.28	58.08	499.9	0	47	96.08	47.1	-0.0292	0.7	111105
Control		20	14:30-15:30	Large	d-1	0.624	0.0633	1.27	369	1.88	6	1	2.84	32.99	32.15	33.04	398.75	397.4	29.05	30.523	55.28	58.09	499.9	0	47	96.08	47.1	-0.0292	0.7	111105
Control		20	14:30-15:30	Large	d-1	0.666	0.0632	1.26	368	1.88	6	1	2.84	32.99	32.15	33.04	398.91	397.51	29.048	30.518	55.28	58.07	499.9	0	47	96.08	47.1	-0.0292	0.7	111105
Control		20	14:30-15:30	Large	d-1	0.748	0.0634	1.27	366	1.88	6	1	2.84	32.99	32.15	33.04	399.1	397.6	29.044	30.519	55.27	58.08	499.9	0	47	96.08	47.1	-0.0292	0.7	111105
Control		20	14:30-15:30	Large	d-1	0.939	0.0639	1.27	361	1.88	6	1	2.84	32.99	32.14	33.04	399.53	397.79	29.043	30.526	55.27	58.09	499.9	0	47	96.08	47.1	-0.0292	0.7	111105
Control		20	14:30-15:30	Large	d-1	-2.18	0.0731	1.33	432	1.72	6	1	2.84	32.56	31.52	32.61	393.54	395.52	28.967	30.509	56.46	59.47	499.9	0	25	96.06	52.5	-0.086	0.7	111105
Control		20	14:30-15:30	Large	d-1	-2.18	0.0731	1.33	432	1.72	6	1	2.84	32.56	31.52	32.61	393.54	395.52	28.967	30.509	56.46	59.47	499.9	0	25	96.06	52.5	-0.086	0.7	111105
Control		20	14:30-15:30	Large	d-1	-2.23	0.0729	1.32	433	1.72	6	1	2.84	32.56	31.52	32.61	393.62	395.67	28.967	30.506	56.46	59.45	499.9	0	25	96.06	52.5	-0.086	0.7	111105
Control		20	14:30-15:30	Large	d-1	-2.27	0.0722	1.31	435	1.72	6	1	2.84	32.57	31.53	32.62	393.71	395.81	28.969	30.497	56.45	59.42	499.9	0	26	96.06	52.5	-0.086	0.7	111105
Control		20	14:30-15:30	Large	d-1	-2.31	0.072	1.31	436	1.72	6	1	2.84	32.57	31.53	32.62	393.74	395.89	28.978	30.501	56.46	59.43	499.9	0	26	96.06	52.5	-0.086	0.7	111105
Control		15	14:30-15:30	Medium	d-2	2.67	0.106	1.96	345	1.77	6	1	2.84	33.14	31.99	33.09	402.26	398.11	28.945	31.227	54.62	58.92	499.9	0	156	96.08	47.1	-0.0292	0.7	111105
Control		15	14:30-15:30	Medium	d-2	2.67	0.106	1.96	345	1.77	6	1	2.84	33.14	31.99	33.09	402.26	398.11	28.945	31.227	54.62	58.92	499.9	0	156	96.08	47.1	-0.0292	0.7	111105
Control		15	14:30-15:30	Medium	d-2	2.66	0.105	1.96	345	1.77	6	1	2.84	33.13	31.99	33.09	402.2	398.08	28.948	31.221	54.64	58.93	499.9	0	168	96.08	47.1	-0.0292	0.7	111105
Control		15	14:30-15:30	Medium	d-2	2.54	0.105	1.95	347	1.77	6	1	2.84	33.12	31.99	33.09	402.15	398.16	28.947	31.215	54.67	58.96	499.9	0	180	96.08	47.1	-0.0292	0.7	111105
Control		15	14:30-15:30	Medium	d-2	2.51	0.106	1.96	347	1.77	6	1	2.84	33.12	32	33.09	402.08	398.13	28.95	31.227	54.7	59	499.9	0	202	96.08	47.1	-0.0292	0.7	111105
Control		15	14:30-15:30	Medium	d-2	0.344	0.0609	1.17	368	1.81	6	1	2.84	32.72	31.9	32.72	390.14	389.18	29.176	30.541	56.35	58.99	499.9	0	45	96.06	48.7	-0.0393	0.7	111105
Control		15	14:30-15:30	Medium	d-2	0.344	0.0609	1.17	368	1.81	6	1	2.84	32.72	31.9	32.72	390.14	389.18	29.176	30.541	56.35	58.99	499.9	0	45	96.06	48.7	-0.0393	0.7	111105
Control		15	14:30-15:30	Medium	d-2	0.311	0.0607	1.17	369	1.81	6	1	2.84	32.73	31.9	32.73	390.15	389.23	29.177	30.537	56.32	58.94	499.9	0	45	96.06	48.7	-0.0393	0.7	111105
Control		15	14:30-15:30	Medium	d-2	0.43	0.0604	1.16	366	1.81	6	1	2.84	32.74	31.89	32.73	390.17	389.11	29.178	30.532	56.3	58.91	499.9	0	44	96.06	48.7	-0.0393	0.7	111105
Control		15	14:30-15:30	Medium	d-2	0.345	0.0602	1.16	368	1.81	6	1	2.84	32.75	31.87	32.73	390.18	389.23	29.176	30.521	56.25	58.85	499.9	0	43	96.06	48.7	-0.0393	0.7	111105
Control		15	14:30-15:30	Small	d-3	1.65	0.0896	1.63	353	1.73	6	1	2.84	32.67	31.86	32.73	397.04	394.29	29.438	31.329	57.03	60.7	499.9	0	28	96.07	48.7	-0.0393	0.7	111105
Control		15	14:30-15:30	Small	d-3	1.68	0.0893	1.62	352	1.73	6	1	2.84	32.67	31.86	32.73	397.17	394.39	29.443	31.329	57.04	60.7	499.9	0	28	96.07	48.7	-0.0393	0.7	111105
Control		15	14:30-15:30	Small	d-3	1.73	0.0898	1.63	352	1.73	6	1	2.84	32.67	31.86	32.73	397.28	394.44	29.446	31.341	57.05	60.72	499.9	0	28	96.07	48.7	-0.0393	0.7	111105
Control		15	14:30-15:30	Small	d-3	1.68	0.0899	1.63	353	1.73	6	1	2.84	32.67	31.86	32.73	397.34	394.56	29.45	31.348	57.05	60.73	499.9	0	27	96.07	48.7	-0.0393	0.7	111105
Control		15	14:30-15:30	Small	d-3	1.62	0.0897	1.62	354	1.72	6	1	2.84	32.67	31.85	32.73	397.51	394.79	29.459	31.346	57.07	60.73	499.9	0	27	96.07	48.7	-0.0393	0.7	111105
Control		15	14:30-15:30	Small	d-3	5.27	0.115	2.25	301	1.88	6	1	2.84	32.89	32.33	32.86	395.73	388.36	28.429	31.046	54.41	59.42	499.9	0	160	96.08	47.1	-0.0292	0.7	111105
Control		15	14:30-15:30	Small	d-3	5.24	0.115	2.25	301	1.88	6	1	2.84	32.89	32.34	32.86	395.61	388.28	28.431	31.05	54.42	59.43	499.9	0	174	96.08	47.1	-0.0292	0.7	111105
Control		15	14:30-15:30	Small	d-3	5.31	0.115	2.25	300	1.89	6	1	2.84	32.89	32.34	32.86	395.54	388.12	28.43	31.049	54.42	59.43	499.9	0	188	96.08	47.1	-0.0292	0.7	111105
Control		15	14:30-15:30	Small	d-3	5.34	0.114	2.24	299	1.89	6	1	2.84	32.88	32.35	32.86	395.48	388.03	28.434	31.041	54.44	59.43	499.9	0	200	96.08	47.1	-0.0292	0.7	111105
Control		15	14:30-15:30	Small	d-3	5.26	0.113	2.23	300	1.89	6	1	2.84	32.87	32.35	32.86	395.3	387.95	28.435	31.03	54.47	59.45	499.9	0	237	96.08	47.1	-0.0292	0.7	111105
