# Supplementary material for: Effect of strip clear-cutting on the natural regeneration of Pinus tabuliformis plantations in northeastern China
Source: PeerJ. 2022 Apr 28;10:e13341. doi: 10.7717/peerj.13341 (PMC9057292; doi:10.7717/peerj.13341)
Supplement: Supplemental Information 2 [file peerj-10-13341-s002.xlsx]

## Sheet: sapling regeneration
TYPE	Width	number plot	number of seeding	number of saping	sapling number	effect sapling (height>30cm)、seeding (height<30cm)			branch length for the first whorl
						age	current height/cm	total height/cm	branch 1	branch 2	branch 3	branch 4	branch 5	branch 6	branch 7
clear-cut strip	25	1	0	6	1	18	18	214	9	6.5	12.5	8.3	8.8
clear-cut strip	25	1	0	6	2	22	16	253	7.6	8	12.8
clear-cut strip	25	1	0	6	3	16	17	156	9.5	5.8	16	13	8.5	14
clear-cut strip	25	2	0	2	1	18	18.5	190	5.5	12	9	8.5	8.5
clear-cut strip	25	2	0	2	2	17	16.8	170	7	12	10
clear-cut strip	25	3	0	13	1	21	16	200	14	13	13	10
clear-cut strip	25	3	0	13	2	17	12	90	9.5	3	12
clear-cut strip	25	3	0	13	3	20	10	185	11	8	8	11
clear-cut strip	25	4	0	8	1	15	13	110	14	11	13.5
clear-cut strip	25	4	0	8	2	17	18	120	16	12	6
clear-cut strip	25	4	0	8	3	16	17	114	18	15	22	15	16	11
clear-cut strip	25	4	0	8	4	16	28	132	16	15	23	23	10
clear-cut strip	25	5	0	4	1	15	18	122	11.5	10.5	12
clear-cut strip	25	5	0	4	2	17	22	108	14	11
clear-cut strip	25	8	0	18	1	15	110	155	8	22	28	30	22
clear-cut strip	25	8	0	18	2	11	135	135	9.5	12	8	10
clear-cut strip	25	8	0	18	3	16	40	175	25	18	30	14
clear-cut strip	25	9	0	15	1	18	15	190	15	7	10	8	2.5
clear-cut strip	25	9	0	15	2	22	25	205	9.5	12	10	11
clear-cut strip	25	9	0	15	3	14	35	166	14.5	23	12	10	21
clear-cut strip	25	10	0	5	1	16	20	175	7.5	11	14	9	12	11
clear-cut strip	25	10	0	5	2	17	18	145	15	21	18
clear-cut strip	25	10	0	5	3	20	16	208	4	4	5	11
clear-cut strip	25	11	0	10	1	20	28	210	15	20	10	20	16
clear-cut strip	25	11	0	10	2	16	30	160	19	20	25	21
clear-cut strip	25	11	0	10	3	15	15.5	175	8	15	16
clear-cut strip	25	12	0	6	1	14	17	150	11	15	14.5	16	12
clear-cut strip	25	12	0	6	2	21	11	220	11	5	16
clear-cut strip	25	12	0	6	3	16	16.5	180	14	3	9	12
clear-cut strip	25	13	0	3	1	17	11	125	14	16	20
clear-cut strip	25	14	0	7	1	11	16	140	11	20	17	15
clear-cut strip	25	14	0	7	2	18	20	200	18	22	18
clear-cut strip	25	14	0	7	3	15	15	133	4	15	13	15
clear-cut strip	25	15	0	11	1	15	17	155	1	15
clear-cut strip	25	15	0	11	2	22	18	205	18	15	22
clear-cut strip	25	15	0	11	3	14	16	140	5	12	15
clear-cut strip	20	1	0	6	1	20	18	150	14	12	11
clear-cut strip	20	2	0	18	1	14	10	122	5	4.5	3.8
clear-cut strip	20	2	0	18	2	16	9	155	5	11	12
clear-cut strip	20	2	0	18	3	22	18	172	2.5	7.8	10
clear-cut strip	20	3	0	34	1	18	14	160	10	13.5
clear-cut strip	20	3	0	34	2	20	10	170	4.5	8	6
clear-cut strip	20	3	0	34	3	17	8	180	5	7
clear-cut strip	20	3	0	34	4	21	6.5	170	6.5	5	7
clear-cut strip	20	4	0	4	1	20	6	175	3.5	6	8
clear-cut strip	20	4	0	4	2	20	5	165	3.2	4	5
clear-cut strip	20	5	0	12	1	21	10	260	8	11	4.5
clear-cut strip	20	5	0	12	2	22	13	274	13	9.5	11
clear-cut strip	20	6	0	10	1	18	15	221	10	10.5
clear-cut strip	20	6	0	10	2	20	20	201	12	11	8
clear-cut strip	20	7	0	18	1	20	12	210	8.5	5.2
clear-cut strip	20	7	0	18	2	16	14.5	133	12	14	12
clear-cut strip	20	7	0	18	3	20	11	285	10	12	10	3.5
clear-cut strip	20	8	0	18	1	15	12	165	12	8	12.5	10
clear-cut strip	20	8	0	18	2	18	28	170	8	20	25	20
clear-cut strip	20	8	0	18	3	18	21	145	5	14	8	12
clear-cut strip	20	8	0	18	4	20	18.5	178	7	17	12	15	19
clear-cut strip	20	8	0	18	5	21	20	180	8	11	5	12
clear-cut strip	20	9	0	11	1	20	25	190	14	8	17.5	14
clear-cut strip	20	9	0	11	2	18	26	155	20	20	15
clear-cut strip	20	10	0	3	1	22	22	180	20	18
clear-cut strip	20	10	0	3	2	15	14	100	11.5	12
clear-cut strip	20	11	0	14	1	22	14	158	4	12	11
clear-cut strip	20	11	0	14	2	17	18	190	13	11	5	11
clear-cut strip	20	11	0	14	3	17	8	155	5	7	8
clear-cut strip	20	11	0	14	4	24	20	220	16	20	12
clear-cut strip	20	12	0	30	1	20	17.5	180	14	12	13
clear-cut strip	20	12	0	30	2	19	19	177	3	13	15
clear-cut strip	20	12	0	30	3	23	12	210	9	10	4
clear-cut strip	20	12	0	30	4	19	15.5	185	13	12	11.5	8
clear-cut strip	20	13	0	5	1	15	10	105	10	11	13
clear-cut strip	20	13	0	5	2	22	16	201	8	7
clear-cut strip	20	14	0	12	1	20	11	280	6	4
clear-cut strip	20	14	0	12	2	15	9	210	5	6	4
clear-cut strip	20	14	0	12	3	18	9	115	2.5	4	3
clear-cut strip	20	15	0	7	1	20	22	205	16	9	15
clear-cut strip	20	15	0	7	2	25	19	225	15	12
clear-cut strip	20	15	0	7	3	18	11	180	6	6
clear-cut strip	15	1	0	5	1	18	12	130	6.5	4.5	10
clear-cut strip	15	1	0	5	2	10	10	105	8	10	5
clear-cut strip	15	2	0	2	1	18	11	120	2	3.5
clear-cut strip	15	3	0	4	1	11	11	56	11	11
clear-cut strip	15	3	0	4	2	14	12	95	14	10	3
clear-cut strip	15	4	0	8	1	12	12	85	7	8	11
clear-cut strip	15	4	0	8	2	20	16	150	14.5	15	11
clear-cut strip	15	4	0	8	3	18	15	155	13.5	12	6.5	16
clear-cut strip	15	5	0	2	1	15	16	120	11	15	8
clear-cut strip	15	6	0	8	1	18	15	150	14	15	11
clear-cut strip	15	6	0	8	2	20	30	155	30	21	30	11
clear-cut strip	15	7	0	7	1	11	21	110	24	21	20	22
clear-cut strip	15	7	0	7	2	15	18	135	17	11
clear-cut strip	15	8	0	6	1	11	22	183	8	17	18	4	11
clear-cut strip	15	8	0	6	2	22	18	145	18	2	9	15
clear-cut strip	15	8	0	6	3	21	20	145	20	16	6	15	14
clear-cut strip	15	9	0	21	1	22	8	260	10	8
clear-cut strip	15	9	0	21	2	18	11	122	8	11	10
clear-cut strip	15	9	0	21	3	12	9.5	150	6	8	3
clear-cut strip	15	9	0	21	4	21	11	115	6	7	7.5	10
clear-cut strip	15	10	0	16	1	20	20	260	8	16	13.5	9	11
clear-cut strip	15	10	0	16	2	18	12	255	7.5	12	11	11
clear-cut strip	15	11	0	13	1	18	15	270	13	10
clear-cut strip	15	11	0	13	2	21	22	266	9.5	5	6
clear-cut strip	15	11	0	13	3	22	13	188	7	8
clear-cut strip	15	12	0	1	1	17	10	111	8.5	6
clear-cut strip	15	13	0	15	1	14	21	131	15.5	5	19	14	17
clear-cut strip	15	13	0	15	2	19	13	130	2	6.5	10
clear-cut strip	15	13	0	15	3	12	22	110	5	11	16	12
clear-cut strip	15	13	0	15	4	14	15	140	16	12	16	11
clear-cut strip	15	14	0	19	1	20	22	250	20	18	20	20
clear-cut strip	15	14	0	19	2	15	23	155	15	18
clear-cut strip	15	14	0	19	3	20	15	175	9	7	9.5
clear-cut strip	15	14	0	19	4	17	18	270	10	3	10
clear-cut strip	15	15	0	12	1	11	14	160	14	9	8	8.5
clear-cut strip	15	15	0	12	2	23	11	188	9	10	5.5
clear-cut strip	15	15	0	12	3	25	6	145	5	5
clear-cut strip	15	15	0	12	4	21	11	120	9	10	5.8
uncut strip	18	1	0	7	1	15	8.5	120	6.5	8
uncut strip	18	1	0	7	2	20	7.5	122	6
uncut strip	18	2	0	8	1	20	8	120	5
uncut strip	18	2	0	8	2	15	11	122	6
uncut strip	18	3	0	3	1	20	10	108	5	5.5
uncut strip	18	4	0	2	1	18	11	125	8	6
uncut strip	18	5	0	1	1	21	11	218	10	9
uncut strip	18	6	0	1	1	11	15	105	5	5.5	8
uncut strip	18	7	0	5	1	14	7	137	6
uncut strip	18	7	0	5	2	21	9	230	4	10
uncut strip	18	7	0	5	3	20	15	188	8	4
uncut strip	18	8	0	12	1	20	10	204	4	7
uncut strip	18	10	0	5	1	18	8.3	150	6	7
uncut strip	18	10	0	3	2	18	7	160	4
uncut strip	18	12	0	3	1	11	12	77	6	5
uncut strip	18	13	0	2	1	15	11	148	9	8	3
uncut strip	18	13	0	2	2	20	4	150	3.1
uncut strip	18	14	0	3	1	18	6	221	6	4
uncut strip	18	14	0	3	2	15	6	200	7.5	8
uncut strip	18	15	0	23	1	18	12	200	8	6.8
uncut strip	18	15	0	23	2	21	10	255	4.5	5	8	10	7
uncut strip	18	15	0	23	3	19	12	242	10	3.4
uncut strip	10	1	0	6	1	20	16	150	6	12.5	7	6.5
uncut strip	10	1	0	6	2	15	13	188	4	5
uncut strip	10	2	2	9	1	15	10	122	6.5	3.8	7
uncut strip	10	2	2	9	2	19	9	156	4.5	4	8
uncut strip	10	4	0	12	1	18	5	109	7.5	6.5
uncut strip	10	4	0	12	2	22	8.5	188	6.5	9	2.5
uncut strip	10	4	0	12	3	23	15.6	211	7.5	5
uncut strip	10	5	0	2	1	22	20	305	9.5	6.5	7.5
uncut strip	10	6	0	4	2	16	8.5	205	4.5	7	6.5
uncut strip	10	7	0	3	1	22	10.5	155	10.5	10
uncut strip	10	7	0	3	2	16	6	132	4
uncut strip	10	8	0	5	1	18	5	98	5	6.5
uncut strip	10	8	0	5	2	17	8	100	7.5
uncut strip	10	9	0	5	1	17	8.5	105	8
uncut strip	10	9	0	5	2	18	9.5	166	4.5	1.5
uncut strip	10	9	0	5	3	21	15	185	10	8	7
uncut strip	10	10	0	3	1	20	11	160	5.5
uncut strip	10	10	0	3	2	18	4	130	5	6
uncut strip	10	10	0	3	3	14	9	155	6	4.5
uncut strip	10	11	0	2	1	17	8	106	4.5	5
uncut strip	10	12	0	3	2	20	5	152	4.5
uncut strip	10	15	0	16	1	26	10	175	5.5
uncut strip	10	15	0	16	2	13	10	115	7	5
uncut strip	10	15	0	16	3	21	8.5	195	3.5
Control		3	0	6	1	19	14	260	19	16
Control		3	0	6	2	20	17	292	18	19
Control		4	1	3	1	13	6.5	95	3	4
Control		4	1	3	2	14	7	97	3.2
Control		5	0	12	1	17	11	180	8.5	11
Control		5	0	12	2	19	12	180	3
Control		5	0	12	3	20	12	176	13	13
Control		5	0	12	4	11	5	50	3.2	1
Control		6	0	3	2	15	6	110	6.5
Control		7	0	11	1	19	3	142	8
Control		7	0	11	2	14	6	105	2	3.5
Control		7	0	11	3	18	8	152	7
Control		8	0	7	1	18	10	205	9	1
Control		9	0	3	1	19	13	220	9.5
Control		10	0	3	1	18	8	20	2
Control		11	0	1	1	16	8	75	1	5.2	8
Control		12	0	3	1	19	15.5	168	9	3.5	8
Control		13	0	3	1	20	15	253	15	5	14
Control		14	0	8	1	20	7	150	2
Control		14	0	8	2	17	13	168	10	5
Control		15	0	5	1	19	11	150	5.5
Control		15	0	5	2	16	6	69	4

## Sheet: photosynthesis
Type	width	age	period	sapling type	Plot number	Photo	stomatal conductance	transpiration rate	Ci	VpdL	Area	StmRat	BLCond	Tair	Tleaf	TBlk	CO2R	CO2S	H2OR	H2OS	RH_R	RH_S	Flow	PARi	PARo	Press	CsMch	HsMch	StableF	Status
Clear-cut strip	25	25	9:30-10:30	Large	c-25-1	3.89778	0.0710572	1.12078	271	1.68	6	1	2.84	31.56	32.7	31.41	394.79	388.74	32.53	33.946	67.64	70.58	499.9	0	1202	96.85	290	21.4	0.7	111105
Clear-cut strip	25	25	9:30-10:30	Large	c-25-1	4.55494	0.0606382	1.20214	272	1.68	6	1	2.84	31.57	32.7	31.42	394.77	388.75	32.526	33.948	67.6	70.56	499.9	0	1197	96.85	290	21.4	0.7	111105
Clear-cut strip	25	25	9:30-10:30	Large	c-25-1	4.6743	0.0631817	1.23046	272	1.68	6	1	2.84	31.57	32.7	31.42	394.75	388.69	32.522	33.95	67.58	70.55	499.9	0	1191	96.85	290	21.4	0.7	111105
Clear-cut strip	25	25	9:30-10:30	Large	c-25-1	4.31134	0.0781194	1.07754	273	1.68	6	1	2.84	31.57	32.7	31.42	394.74	388.7	32.515	33.954	67.59	70.58	499.9	0	1185	96.85	290	21.4	0.7	111105
Clear-cut strip	25	25	9:30-10:30	Large	c-25-1	4.18414	0.0761091	1.3085	275	1.68	6	1	2.84	31.58	32.71	31.42	394.69	388.74	32.512	33.95	67.55	70.53	499.9	0	1177	96.85	290	21.4	0.7	111105
Clear-cut strip	25	12	9:30-10:30	Medium	c-25-2	4.96889	0.0804896	1.62166	276	1.72	6	1	2.84	32.18	32.98	32	394.5	387.16	32.494	34.351	65.26	68.99	499.8	0	1189	96.86	290	21.4	0.7	111105
Clear-cut strip	25	12	9:30-10:30	Medium	c-25-2	5.19163	0.0794119	1.41096	277	1.72	6	1	2.84	32.18	32.97	32	394.45	387.15	32.499	34.355	65.26	68.99	499.8	0	1188	96.86	290	21.4	0.7	111105
Clear-cut strip	25	12	9:30-10:30	Medium	c-25-2	4.85412	0.0897367	1.73608	277	1.72	6	1	2.84	32.19	32.97	32.01	394.41	387.17	32.508	34.357	65.24	68.94	499.8	0	1185	96.86	290	21.4	0.7	111105
Clear-cut strip	25	12	9:30-10:30	Medium	c-25-2	6.09435	0.0873871	1.67141	279	1.71	6	1	2.84	32.2	32.97	32.01	394.34	387.19	32.517	34.365	65.21	68.92	499.8	0	1182	96.86	290	21.4	0.7	111105
Clear-cut strip	25	12	9:30-10:30	Medium	c-25-2	4.9494	0.0831079	1.47224	278	1.72	6	1	2.84	32.21	32.97	32.02	394.23	387.12	32.534	34.364	65.2	68.86	499.8	0	1173	96.86	290	21.4	0.7	111105
Clear-cut strip	25	10	9:30-10:30	Small	c-25-3	7.06883	0.10363	2.11917	248	1.91	6	1	2.84	32.43	33.47	32.24	400.95	390.69	31.617	33.854	62.58	67.01	499.8	0	1674	96.87	290	21.4	0.7	111105
Clear-cut strip	25	10	9:30-10:30	Small	c-25-3	7.65975	0.0888621	2.12775	248	1.91	6	1	2.84	32.44	33.46	32.24	400.93	390.64	31.616	33.859	62.58	67.02	499.8	0	1673	96.87	290	21.4	0.7	111105
Clear-cut strip	25	10	9:30-10:30	Small	c-25-3	7.30669	0.094632	1.77162	248	1.91	6	1	2.84	32.44	33.46	32.24	400.91	390.66	31.619	33.861	62.58	67.02	499.8	0	1671	96.87	290	21.4	0.7	111105
Clear-cut strip	25	10	9:30-10:30	Small	c-25-3	7.25934	0.105465	1.77849	249	1.9	6	1	2.84	32.44	33.46	32.25	400.91	390.71	31.62	33.858	62.56	66.99	499.8	0	1670	96.87	290	21.4	0.7	111105
Clear-cut strip	25	10	9:30-10:30	Small	c-25-3	7.11149	0.0907511	1.9743	251	1.9	6	1	2.84	32.45	33.45	32.25	400.84	390.76	31.621	33.862	62.54	66.97	499.8	0	1670	96.87	290	21.4	0.7	111105
Clear-cut strip	25	25	11:00-12:00	Large	c-25-1	6.34843	0.0705063	2.52917	189	3.68	6	1	2.84	37.05	38.42	36.92	359.25	351.3	29.501	32.447	44.96	49.45	499.9	0	1813	96.37	4.73	0.512	0.3	111105
Clear-cut strip	25	25	11:00-12:00	Large	c-25-1	6.21247	0.0710444	2.61593	190	3.67	6	1	2.84	37.06	38.41	36.92	359.25	351.32	29.52	32.48	44.99	49.5	499.9	0	1810	96.37	4.73	0.512	0.3	111105
Clear-cut strip	25	25	11:00-12:00	Large	c-25-1	5.31708	0.0706791	2.60092	188	3.67	6	1	2.84	37.06	38.41	36.92	359.24	351.26	29.566	32.509	45.04	49.52	499.9	0	1806	96.37	4.73	0.512	0.3	111105
Clear-cut strip	25	25	11:00-12:00	Large	c-25-1	6.36725	0.0588246	2.33027	187	3.68	6	1	2.84	37.07	38.43	36.93	359.23	351.2	29.606	32.546	45.09	49.56	499.9	0	1803	96.37	4.73	0.512	0.3	111105
Clear-cut strip	25	25	11:00-12:00	Large	c-25-1	6.01314	0.0681864	2.66306	180	3.7	6	1	2.84	37.08	38.51	36.93	359.24	350.96	29.683	32.613	45.18	49.64	499.9	0	1803	96.37	4.73	0.512	0.3	111105
Clear-cut strip	25	25	11:00-12:00	Large	c-25-1	5.20188	0.0544383	1.24792	229	2.01	6	1	2.84	33.69	34.04	33.65	389.85	383.9	33.223	34.493	61.28	63.62	500	0	692	96.86	288	21.8	0.7	111105
Clear-cut strip	25	25	11:00-12:00	Large	c-25-1	4.7326	0.0529349	1.01575	229	2.01	6	1	2.84	33.69	34.04	33.65	389.85	383.9	33.223	34.493	61.28	63.62	500	0	692	96.86	288	21.8	0.7	111105
Clear-cut strip	25	25	11:00-12:00	Large	c-25-1	4.7811	0.0526405	1.21158	235	2.01	6	1	2.84	33.7	34.04	33.65	389.68	383.99	33.239	34.502	61.29	63.62	500	0	695	96.86	288	21.8	0.7	111105
Clear-cut strip	25	25	11:00-12:00	Large	c-25-1	3.70729	0.0594063	0.922816	245	2.01	6	1	2.84	33.7	34.04	33.65	389.46	384.14	33.257	34.518	61.31	63.64	500	0	699	96.86	288	21.8	0.7	111105
Clear-cut strip	25	25	11:00-12:00	Large	c-25-1	4.40942	0.0604133	0.900892	251	2.01	6	1	2.84	33.7	34.04	33.66	389.32	384.24	33.27	34.525	61.33	63.64	500	0	701	96.86	288	21.8	0.7	111105
Clear-cut strip	25	12	11:00-12:00	Medium	c-25-2	1.84667	0.081481	2.87321	309	2.93	6	1	2.84	37.02	36.21	36.93	363.31	359.92	28.992	32.191	44.27	49.15	499.9	0	623	96.38	4.73	0.512	0.7	111105
Clear-cut strip	25	12	11:00-12:00	Medium	c-25-2	1.17803	0.0810537	2.86372	309	2.93	6	1	2.84	37.02	36.21	36.93	363.31	359.92	28.992	32.191	44.27	49.15	499.9	0	623	96.38	4.73	0.512	0.7	111105
Clear-cut strip	25	12	11:00-12:00	Medium	c-25-2	0.564291	0.0985	2.72098	320	2.94	6	1	2.84	37.02	36.21	36.93	363.29	360.6	28.986	32.194	44.26	49.16	499.9	0	627	96.38	4.73	0.512	0.7	111105
Clear-cut strip	25	12	11:00-12:00	Medium	c-25-2	0.453776	0.0894053	2.83545	329	2.94	6	1	2.84	37.02	36.22	36.93	363.3	361.19	28.985	32.188	44.26	49.15	499.9	0	634	96.38	4.73	0.512	0.7	111105
Clear-cut strip	25	12	11:00-12:00	Medium	c-25-2	0.158516	0.0827132	2.58784	350	2.94	6	1	2.84	37.02	36.22	36.92	363.28	362.42	28.977	32.182	44.26	49.15	499.9	0	649	96.38	4.73	0.512	0.7	111105
Clear-cut strip	25	12	11:00-12:00	Medium	c-25-2	3.31353	0.0532999	1.24397	264	2	6	1	2.84	33.88	34.28	33.83	385.52	380.9	34.057	35.353	62.16	64.52	499.9	0	915	96.86	288	21.8	1	111105
Clear-cut strip	25	12	11:00-12:00	Medium	c-25-2	2.96857	0.0615888	1.29061	264	2	6	1	2.84	33.88	34.28	33.83	385.52	380.9	34.057	35.353	62.16	64.52	499.9	0	915	96.86	288	21.8	1	111105
Clear-cut strip	25	12	11:00-12:00	Medium	c-25-2	3.67829	0.0500111	1.20063	265	2	6	1	2.84	33.88	34.28	33.84	385.49	380.89	34.052	35.349	62.14	64.51	499.9	0	915	96.86	288	21.8	1	111105
Clear-cut strip	25	12	11:00-12:00	Medium	c-25-2	3.52339	0.0449043	1.02519	266	2	6	1	2.84	33.88	34.28	33.84	385.49	380.92	34.046	35.346	62.13	64.5	499.9	0	916	96.86	288	21.8	1	111105
Clear-cut strip	25	12	11:00-12:00	Medium	c-25-2	3.82759	0.0498664	1.25132	269	2	6	1	2.84	33.89	34.27	33.84	385.45	381	34.037	35.337	62.1	64.47	499.9	0	917	96.86	288	21.8	1	111105
Clear-cut strip	25	10	11:00-12:00	Small	c-25-3	4.93242	0.087467	3.33274	237	3.37	6	1	2.84	37.15	37.83	36.95	361.59	353.3	29.488	33.422	44.7	50.66	499.9	0	1592	96.38	4.73	0.512	1	111105
Clear-cut strip	25	10	11:00-12:00	Small	c-25-3	6.33415	0.0903512	3.61083	236	3.39	6	1	2.84	37.15	37.87	36.95	361.64	353.21	29.467	33.435	44.68	50.69	499.9	0	1604	96.38	4.73	0.512	1	111105
Clear-cut strip	25	10	11:00-12:00	Small	c-25-3	6.55794	0.0991604	3.42906	236	3.41	6	1	2.84	37.15	37.92	36.95	361.74	353.29	29.434	33.434	44.63	50.69	499.9	0	1610	96.38	4.73	0.512	1	111105
Clear-cut strip	25	10	11:00-12:00	Small	c-25-3	5.71533	0.0862528	3.32989	238	3.41	6	1	2.84	37.15	37.93	36.95	361.73	353.44	29.418	33.424	44.6	50.67	499.9	0	1606	96.38	4.73	0.512	0.7	111105
Clear-cut strip	25	10	11:00-12:00	Small	c-25-3	5.8308	0.086265	3.53272	239	3.41	6	1	2.84	37.15	37.93	36.95	361.75	353.51	29.41	33.419	44.59	50.66	499.9	0	1605	96.38	4.73	0.512	0.7	111105
Clear-cut strip	25	10	11:00-12:00	Small	c-25-3	4.61861	0.0843863	1.59497	287	1.86	6	1	2.84	34.03	34.04	33.96	381.97	376.4	34.169	36.06	61.83	65.25	499.9	0	975	96.87	288	21.8	0.7	111105
Clear-cut strip	25	10	11:00-12:00	Small	c-25-3	3.95952	0.0826577	1.51054	287	1.86	6	1	2.84	34.04	34.04	33.96	381.86	376.31	34.171	36.062	61.82	65.24	499.9	0	975	96.87	288	21.8	0.7	111105
Clear-cut strip	25	10	11:00-12:00	Small	c-25-3	3.30667	0.0746473	1.7259	288	1.86	6	1	2.84	34.04	34.04	33.96	381.76	376.29	34.179	36.064	61.83	65.24	499.9	0	976	96.87	288	21.8	0.7	111105
Clear-cut strip	25	10	11:00-12:00	Small	c-25-3	4.3831	0.0920602	1.5806	289	1.86	6	1	2.84	34.04	34.04	33.97	381.66	376.26	34.182	36.062	61.84	65.24	499.9	0	976	96.87	288	21.8	0.7	111105
Clear-cut strip	25	10	11:00-12:00	Small	c-25-3	3.0648	0.0925502	1.52818	289	1.86	6	1	2.84	34.05	34.04	33.97	381.51	376.15	34.194	36.066	61.84	65.22	499.9	0	976	96.87	288	21.8	0.7	111105
Clear-cut strip	25	25	13:00-14:00	Large	c-25-1	2.62274	0.049377	1.72061	267	2.54	6	1	2.84	34.19	34.74	34.13	371.83	367.5	29.583	31.381	52.76	55.97	499.9	0	1133	96.3	2.71	0.729	0.7	111105
Clear-cut strip	25	25	13:00-14:00	Large	c-25-1	2.63874	0.0644016	1.3542	266	2.54	6	1	2.84	34.19	34.74	34.14	371.66	367.27	29.594	31.4	52.77	55.99	499.9	0	1260	96.3	2.71	0.729	1	111105
Clear-cut strip	25	25	13:00-14:00	Large	c-25-1	3.0711	0.061728	1.69457	267	2.54	6	1	2.84	34.19	34.74	34.14	371.46	367.11	29.604	31.41	52.78	56	499.9	0	1271	96.3	2.71	0.729	0.7	111105
Clear-cut strip	25	25	13:00-14:00	Large	c-25-1	2.91882	0.052342	1.41789	265	2.54	6	1	2.84	34.2	34.74	34.14	371.21	366.81	29.615	31.418	52.8	56.01	499.9	0	1273	96.3	2.71	0.729	0.7	111105
Clear-cut strip	25	25	13:00-14:00	Large	c-25-1	3.4344	0.0631732	1.40581	267	2.54	6	1	2.84	34.2	34.76	34.14	370.73	366.46	29.649	31.44	52.84	56.03	499.9	0	1284	96.3	2.71	0.729	0.7	111105
Clear-cut strip	25	25	13:00-14:00	Large	c-25-1	2.71278	0.071422	1.26137	322	1.59	6	1	2.84	32.7	32.49	32.71	383.73	380.34	32.743	34.252	63.78	66.72	499.9	0	407	96.79	288	21.8	0.7	111105
Clear-cut strip	25	25	13:00-14:00	Large	c-25-1	2.15071	0.0876198	1.24294	320	1.59	6	1	2.84	32.71	32.48	32.71	383.73	380.27	32.742	34.25	63.78	66.71	499.9	0	407	96.79	288	21.8	0.7	111105
Clear-cut strip	25	25	13:00-14:00	Large	c-25-1	2.69908	0.0785869	1.11119	321	1.59	6	1	2.84	32.71	32.48	32.71	383.73	380.27	32.735	34.252	63.76	66.71	499.9	0	407	96.79	288	21.8	0.7	111105
Clear-cut strip	25	25	13:00-14:00	Large	c-25-1	2.25654	0.0756351	1.17541	319	1.59	6	1	2.84	32.71	32.48	32.72	383.73	380.16	32.732	34.254	63.75	66.71	499.9	0	407	96.79	288	21.8	0.7	111105
Clear-cut strip	25	25	13:00-14:00	Large	c-25-1	3.13823	0.0804178	1.44443	319	1.59	6	1	2.84	32.71	32.48	32.72	383.69	380.16	32.731	34.248	63.74	66.7	499.9	0	406	96.79	288	21.8	0.7	111105
Clear-cut strip	25	12	13:00-14:00	Medium	c-25-2	3.02688	0.0676934	2.04485	280	2.5	6	1	2.84	34.52	34.84	34.43	367.26	362.45	29.816	32.199	52.22	56.39	499.9	0	1294	96.3	2.71	0.729	0.7	111105
Clear-cut strip	25	12	13:00-14:00	Medium	c-25-2	3.59434	0.0761593	1.91563	278	2.5	6	1	2.84	34.52	34.84	34.43	367.26	362.33	29.807	32.218	52.2	56.42	499.9	0	1293	96.3	2.71	0.729	1	111105
Clear-cut strip	25	12	13:00-14:00	Medium	c-25-2	3.7175	0.0839899	2.18405	279	2.5	6	1	2.84	34.52	34.84	34.43	367.24	362.3	29.802	32.23	52.19	56.44	499.9	0	1292	96.3	2.71	0.729	1	111105
Clear-cut strip	25	12	13:00-14:00	Medium	c-25-2	4.11846	0.0813176	1.92924	279	2.5	6	1	2.84	34.52	34.85	34.43	367.19	362.25	29.797	32.241	52.17	56.45	499.9	0	1292	96.3	2.71	0.729	1	111105
Clear-cut strip	25	12	13:00-14:00	Medium	c-25-2	2.98302	0.0757446	2.09444	280	2.5	6	1	2.84	34.53	34.86	34.44	367.14	362.13	29.776	32.278	52.12	56.5	499.9	0	1289	96.3	2.71	0.729	0.3	111105
Clear-cut strip	25	12	13:00-14:00	Medium	c-25-2	1.73697	0.0707184	1.3208	343	1.61	6	1	2.84	32.76	32.55	32.76	381.15	378.99	32.628	34.212	63.35	66.42	500	0	531	96.79	288	21.8	1	111105
Clear-cut strip	25	12	13:00-14:00	Medium	c-25-2	1.7082	0.0815318	1.38396	343	1.61	6	1	2.84	32.76	32.55	32.76	381.15	378.99	32.628	34.212	63.35	66.42	500	0	531	96.79	288	21.8	1	111105
Clear-cut strip	25	12	13:00-14:00	Medium	c-25-2	1.27293	0.0895226	1.42907	343	1.61	6	1	2.84	32.77	32.55	32.76	381.11	378.97	32.633	34.214	63.35	66.42	500	0	531	96.79	288	21.8	1	111105
Clear-cut strip	25	12	13:00-14:00	Medium	c-25-2	0.815324	0.0867574	1.48675	342	1.61	6	1	2.84	32.77	32.55	32.76	381.07	378.89	32.631	34.218	63.34	66.42	500.1	0	531	96.79	288	21.8	1	111105
Clear-cut strip	25	12	13:00-14:00	Medium	c-25-2	0.801823	0.0757188	1.49056	343	1.61	6	1	2.84	32.77	32.55	32.77	380.97	378.82	32.631	34.222	63.35	66.43	500	0	529	96.79	288	21.8	1	111105
Clear-cut strip	25	10	13:00-14:00	Small	c-25-3	3.72861	0.093748	2.35797	278	2.56	6	1	2.84	34.69	35.19	34.6	362.61	357.35	29.881	32.658	51.84	56.66	499.9	0	1512	96.3	2.71	0.729	0.7	111105
Clear-cut strip	25	10	13:00-14:00	Small	c-25-3	3.47177	0.0878225	2.24128	277	2.56	6	1	2.84	34.69	35.2	34.61	362.59	357.22	29.875	32.674	51.82	56.68	499.9	0	1514	96.3	2.71	0.729	0.7	111105
Clear-cut strip	25	10	13:00-14:00	Small	c-25-3	3.92936	0.0839464	2.58866	277	2.57	6	1	2.84	34.69	35.2	34.61	362.58	357.25	29.87	32.674	51.81	56.67	499.9	0	1516	96.3	2.71	0.729	0.7	111105
Clear-cut strip	25	10	13:00-14:00	Small	c-25-3	4.02393	0.0882992	2.34221	277	2.57	6	1	2.84	34.69	35.21	34.61	362.54	357.15	29.868	32.681	51.8	56.68	499.9	0	1518	96.3	2.71	0.729	0.7	111105
Clear-cut strip	25	10	13:00-14:00	Small	c-25-3	3.5241	0.0893925	2.34844	276	2.57	6	1	2.84	34.69	35.21	34.61	362.54	357.09	29.866	32.688	51.79	56.69	499.9	0	1519	96.3	2.71	0.729	0.7	111105
Clear-cut strip	25	10	13:00-14:00	Small	c-25-3	2.42023	0.0808587	1.54307	337	1.59	6	1	2.84	32.69	32.54	32.71	383.46	380.77	32.851	34.432	64.03	67.11	499.8	0	539	96.79	288	21.8	0.7	111105
Clear-cut strip	25	10	13:00-14:00	Small	c-25-3	1.83768	0.0769054	1.26527	336	1.59	6	1	2.84	32.69	32.54	32.71	383.43	380.71	32.85	34.422	64.02	67.09	499.8	0	539	96.79	288	21.8	0.7	111105
Clear-cut strip	25	10	13:00-14:00	Small	c-25-3	2.51159	0.0715791	1.27355	335	1.59	6	1	2.84	32.69	32.54	32.71	383.42	380.68	32.846	34.421	64.02	67.09	499.8	0	539	96.79	288	21.8	0.7	111105
Clear-cut strip	25	10	13:00-14:00	Small	c-25-3	1.90501	0.0779798	1.19212	337	1.59	6	1	2.84	32.7	32.54	32.71	383.4	380.75	32.844	34.41	64.01	67.06	499.8	0	539	96.79	288	21.8	0.7	111105
Clear-cut strip	25	10	13:00-14:00	Small	c-25-3	1.22748	0.0834988	1.16239	338	1.59	6	1	2.84	32.7	32.54	32.71	383.37	380.83	32.841	34.4	64	67.04	499.8	0	539	96.79	288	21.8	0.7	111105
Clear-cut strip	25	25	14:30-15:30	Large	c-25-1	7.94871	0.0818821	1.24498	2.14	2.23	6	1	2.84	34.02	34.33	34.02	399.86	390.01	30.837	33.32	55.52	59.99	499.9	0	890	96.29	47.1	-0.0292	0.7	111105
Clear-cut strip	25	25	14:30-15:30	Large	c-25-1	7.36546	0.094542	2.44954	2.14	2.23	6	1	2.84	34.02	34.32	34.02	399.85	390.03	30.835	33.321	55.51	59.98	499.9	0	888	96.29	47.1	-0.0292	0.7	111105
Clear-cut strip	25	25	14:30-15:30	Large	c-25-1	6.84541	0.0967237	2.46008	2.14	2.23	6	1	2.84	34.02	34.32	34.02	399.88	390.07	30.835	33.323	55.5	59.98	499.9	0	887	96.29	47.1	-0.0292	0.7	111105
Clear-cut strip	25	25	14:30-15:30	Large	c-25-1	6.95285	0.0836709	2.46975	2.15	2.23	6	1	2.84	34.02	34.31	34.02	399.9	390.17	30.834	33.324	55.5	59.98	499.9	0	886	96.29	47.1	-0.0292	0.7	111105
Clear-cut strip	25	25	14:30-15:30	Large	c-25-1	7.62239	0.0968111	2.50106	2.16	2.22	6	1	2.84	34.02	34.29	34.02	399.87	390.27	30.835	33.335	55.49	59.99	500	0	882	96.29	47.1	-0.0292	0.7	111105
Clear-cut strip	25	25	14:30-15:30	Large	c-25-1	1.79707	0.0593241	3.1118	0.822	1.31	6	1	2.84	30.8	30.49	30.82	383.68	380.58	30.775	31.731	66.77	68.84	499.9	0	254	96.79	286	21	0.7	111105
Clear-cut strip	25	25	14:30-15:30	Large	c-25-1	1.93657	0.0516318	3.11129	0.828	1.31	6	1	2.84	30.81	30.49	30.82	383.67	380.56	30.775	31.737	66.76	68.85	499.9	0	254	96.79	286	21	0.7	111105
Clear-cut strip	25	25	14:30-15:30	Large	c-25-1	1.77332	0.0524803	3.1092	0.83	1.31	6	1	2.84	30.81	30.49	30.82	383.72	380.59	30.775	31.74	66.76	68.86	499.9	0	254	96.79	286	21	0.7	111105
Clear-cut strip	25	25	14:30-15:30	Large	c-25-1	2.57035	0.069056	3.11966	0.833	1.31	6	1	2.84	30.81	30.5	30.82	383.69	380.63	30.771	31.739	66.75	68.85	499.9	0	254	96.79	286	21	0.7	111105
Clear-cut strip	25	25	14:30-15:30	Large	c-25-1	2.84312	0.0540099	3.14976	0.839	1.31	6	1	2.84	30.81	30.51	30.82	383.71	380.71	30.766	31.741	66.73	68.85	499.9	0	253	96.79	286	21	0.7	111105
Clear-cut strip	25	12	14:30-15:30	Medium	c-25-2	6.30306	0.171655	3.23996	3.56	1.92	6	1	2.84	34.18	33.84	34.16	396.92	388.49	30.871	34.99	55.08	62.43	500	0	806	96.29	47.1	-0.0292	0.7	111105
Clear-cut strip	25	12	14:30-15:30	Medium	c-25-2	5.92216	0.180783	3.23046	3.56	1.93	6	1	2.84	34.18	33.84	34.16	396.88	388.36	30.869	34.99	55.07	62.43	500	0	806	96.29	47.1	-0.0292	0.7	111105
Clear-cut strip	25	12	14:30-15:30	Medium	c-25-2	6.13022	0.18569	3.22998	3.55	1.93	6	1	2.84	34.18	33.85	34.16	396.81	388.35	30.865	34.976	55.06	62.4	500	0	805	96.29	47.1	-0.0292	0.7	111105
Clear-cut strip	25	12	14:30-15:30	Medium	c-25-2	6.40136	0.17049	3.23067	3.55	1.93	6	1	2.84	34.18	33.85	34.16	396.75	388.28	30.862	34.975	55.05	62.39	500	0	803	96.29	47.1	-0.0292	0.7	111105
Clear-cut strip	25	12	14:30-15:30	Medium	c-25-2	6.12444	0.178036	3.23102	3.55	1.93	6	1	2.84	34.18	33.86	34.16	396.7	388.19	30.861	34.974	55.05	62.38	500	0	801	96.29	47.1	-0.0292	0.7	111105
Clear-cut strip	25	12	14:30-15:30	Medium	c-25-2	0.541926	0.0585579	3.51133	0.952	1.36	6	1	2.84	30.75	30.77	30.78	383.6	382.07	30.812	31.918	67.05	69.45	499.8	0	277	96.78	286	21	0.7	111105
Clear-cut strip	25	12	14:30-15:30	Medium	c-25-2	0.688561	0.0564763	3.51196	0.952	1.36	6	1	2.84	30.75	30.77	30.78	383.6	382.07	30.812	31.918	67.05	69.45	499.8	0	277	96.78	286	21	0.7	111105
Clear-cut strip	25	12	14:30-15:30	Medium	c-25-2	0.59522	0.0611921	3.52186	0.953	1.36	6	1	2.84	30.75	30.76	30.78	383.56	382.07	30.81	31.917	67.04	69.45	499.8	0	277	96.78	286	21	0.7	111105
Clear-cut strip	25	12	14:30-15:30	Medium	c-25-2	0.698346	0.0754317	3.52805	0.957	1.36	6	1	2.84	30.75	30.75	30.78	383.52	382.09	30.811	31.923	67.04	69.46	499.9	0	277	96.78	286	21	0.7	111105
Clear-cut strip	25	12	14:30-15:30	Medium	c-25-2	0.28945	0.0648203	3.52092	0.958	1.35	6	1	2.84	30.76	30.73	30.78	383.56	382.06	30.812	31.926	67.03	69.46	499.9	0	276	96.78	286	21	0.7	111105
Clear-cut strip	25	10	14:30-15:30	Small	c-25-3	1.77871	0.0579443	3.10016	0.76	1.23	6	1	2.84	30.69	30.27	30.73	384.04	380.94	31.167	32.05	68.05	69.98	499.9	0	328	96.78	286	21	0.7	111105
Clear-cut strip	25	10	14:30-15:30	Small	c-25-3	2.82618	0.0503867	3.12979	0.764	1.23	6	1	2.84	30.69	30.27	30.73	384.02	381.02	31.167	32.054	68.05	69.99	499.9	0	328	96.78	286	21	1	111105
Clear-cut strip	25	10	14:30-15:30	Small	c-25-3	1.77354	0.0639367	3.14104	0.763	1.23	6	1	2.84	30.69	30.27	30.73	384.01	381.06	31.165	32.051	68.05	69.98	499.8	0	328	96.78	286	21	1	111105
Clear-cut strip	25	10	14:30-15:30	Small	c-25-3	2.76563	0.0494567	3.12092	0.766	1.23	6	1	2.84	30.69	30.27	30.73	384.03	381	31.162	32.052	68.04	69.98	499.8	0	328	96.78	286	21	1	111105
Clear-cut strip	25	10	14:30-15:30	Small	c-25-3	2.03294	0.0496111	3.10811	0.763	1.23	6	1	2.84	30.69	30.28	30.73	384.07	381.01	31.16	32.047	68.03	69.97	499.8	0	329	96.78	286	21	1	111105
Clear-cut strip	25	10	14:30-15:30	Small	c-25-3	6.39028	0.150555	2.88993	3	2.04	6	1	2.84	34.14	33.97	34.16	391.01	381.36	30.787	34.267	55.07	61.29	499.9	0	782	96.29	47.1	-0.0292	0.3	111105
Clear-cut strip	25	10	14:30-15:30	Small	c-25-3	6.33501	0.141592	2.89954	3.01	2.03	6	1	2.84	34.14	33.95	34.16	391	381.41	30.789	34.276	55.07	61.3	499.9	0	736	96.29	47.1	-0.0292	0.3	111105
Clear-cut strip	25	10	14:30-15:30	Small	c-25-3	6.60835	0.148676	2.89014	3.01	2.02	6	1	2.84	34.14	33.92	34.16	390.96	381.27	30.797	34.287	55.07	61.31	499.9	0	732	96.29	47.1	-0.0292	0.3	111105
Clear-cut strip	25	10	14:30-15:30	Small	c-25-3	7.0962	0.148298	2.89114	3.01	2.02	6	1	2.84	34.14	33.91	34.16	390.93	381.23	30.8	34.288	55.07	61.3	499.9	0	732	96.29	47.1	-0.0292	0.3	111105
Clear-cut strip	25	10	14:30-15:30	Small	c-25-3	7.37951	0.145544	2.89801	3.02	2.01	6	1	2.84	34.15	33.92	34.17	390.78	381.16	30.812	34.309	55.07	61.32	499.9	0	826	96.29	47.1	-0.0292	0.7	111105
Clear-cut strip	20	14	11:00-12:00	Medium	c-20-2	3.9179	0.0769639	3.30916	247	4.12	6	1	2.84	39	39.34	38.89	369.63	363.1	27.701	31.494	38.01	43.22	499.9	0	1484	96.42	4.12	0.4	1	111105
Clear-cut strip	20	14	11:00-12:00	Medium	c-20-2	4.86994	0.0280826	0.675178	158	2.34	6	1	2.84	34.94	34.74	34.87	394.16	388.58	32.339	33.27	55.67	57.27	499.9	0	828	96.9	290	20.4	0.7	111105
Clear-cut strip	20	14	11:00-12:00	Medium	c-20-2	4.22682	0.0356357	0.653722	158	2.34	6	1	2.84	34.94	34.74	34.87	394.16	388.58	32.339	33.27	55.67	57.27	499.9	0	828	96.9	290	20.4	0.7	111105
Clear-cut strip	20	14	11:00-12:00	Medium	c-20-2	4.6949	0.0235721	0.77646	158	2.34	6	1	2.84	34.94	34.74	34.87	394.2	388.63	32.338	33.263	55.66	57.25	499.9	0	829	96.9	290	20.4	0.7	111105
Clear-cut strip	20	14	11:00-12:00	Medium	c-20-2	4.54951	0.0380908	0.873427	160	2.34	6	1	2.84	34.94	34.74	34.87	394.24	388.65	32.332	33.268	55.65	57.26	499.9	0	830	96.9	290	20.4	0.7	111105
Clear-cut strip	20	14	11:00-12:00	Medium	c-20-2	3.95839	0.0389307	0.774875	159	2.34	6	1	2.84	34.94	34.74	34.88	394.23	388.62	32.334	33.272	55.65	57.27	499.8	0	835	96.9	290	20.4	0.7	111105
Clear-cut strip	20	14	11:00-12:00	Medium	c-20-2	4.0491	0.0713242	3.42641	250	4.12	6	1	2.84	39	39.34	38.89	369.65	363.25	27.705	31.499	38.02	43.23	499.9	0	1472	96.42	4.12	0.4	1	111105
Clear-cut strip	20	15	11:00-12:00	Small	c-20-3	3.45305	0.00402681	0.215229	-342	2.77	6	1	2.84	35.03	35.9	34.96	393.88	388.82	32.331	32.645	55.36	55.9	499.9	0	1081	96.9	290	20.4	1	111105
Clear-cut strip	20	15	11:00-12:00	Small	c-20-3	3.71267	0.0105236	0.279839	-342	2.77	6	1	2.84	35.03	35.9	34.96	393.88	388.82	32.331	32.645	55.36	55.9	499.9	0	1081	96.9	290	20.4	1	111105
Clear-cut strip	20	15	11:00-12:00	Small	c-20-3	3.41648	0.01743	0.414295	-364	2.77	6	1	2.84	35.04	35.9	34.96	393.87	388.86	32.337	32.638	55.37	55.88	499.9	0	1078	96.9	290	20.4	1	111105
Clear-cut strip	20	15	11:00-12:00	Small	c-20-3	4.3594	0.0183812	0.117337	-384	2.77	6	1	2.84	35.04	35.9	34.96	393.88	388.88	32.345	32.639	55.38	55.88	500	0	1076	96.9	290	20.4	1	111105
Clear-cut strip	20	15	11:00-12:00	Small	c-20-3	4.35861	0.00122505	0.353526	-384	2.77	6	1	2.84	35.04	35.9	34.97	393.87	388.84	32.349	32.645	55.37	55.88	500.1	0	1071	96.9	290	20.4	1	111105
Clear-cut strip	20	15	11:00-12:00	Small	c-20-3	4.88617	0.071762	3.38245	225	4.26	6	1	2.84	39.26	40.01	39.18	369.61	361.66	28.68	32.719	38.8	44.26	499.9	0	1518	96.42	4.12	0.4	0.7	111105
Clear-cut strip	20	15	11:00-12:00	Small	c-20-3	5.84232	0.0724508	3.42879	225	4.26	6	1	2.84	39.26	40.01	39.18	369.61	361.66	28.68	32.719	38.8	44.26	499.9	0	1518	96.42	4.12	0.4	0.7	111105
Clear-cut strip	20	15	11:00-12:00	Small	c-20-3	5.63821	0.0675816	3.40083	226	4.27	6	1	2.84	39.26	40.02	39.19	369.58	361.68	28.687	32.733	38.81	44.28	499.9	0	1508	96.42	4.12	0.4	0.7	111105
Clear-cut strip	20	15	11:00-12:00	Small	c-20-3	5.37099	0.0723382	3.432	225	4.27	6	1	2.84	39.26	40.03	39.19	369.54	361.6	28.693	32.742	38.82	44.29	499.9	0	1499	96.42	4.12	0.4	0.7	111105
Clear-cut strip	20	15	11:00-12:00	Small	c-20-3	5.61378	0.0719068	3.6428	227	4.27	6	1	2.84	39.27	40.05	39.19	369.45	361.59	28.702	32.757	38.83	44.31	499.9	0	1487	96.42	4.12	0.4	0.7	111105
Clear-cut strip	20	26	13:00-14:00	Large	c-20-1	3.70775	0.073829	2.14396	268	2.48	6	1	2.84	33.43	34.56	33.24	366.93	361.12	28.912	31.443	53.83	58.54	499.9	0	1599	96.35	3.78	0.765	0.3	111105
Clear-cut strip	20	26	13:00-14:00	Large	c-20-1	4.24919	0.087571	2.37702	269	2.49	6	1	2.84	33.43	34.57	33.25	366.9	361.15	28.898	31.433	53.79	58.51	499.9	0	1598	96.35	3.78	0.765	0.3	111105
Clear-cut strip	20	26	13:00-14:00	Large	c-20-1	4.35506	0.079484	2.33385	269	2.5	6	1	2.84	33.44	34.59	33.25	366.84	361.14	28.864	31.393	53.71	58.42	499.9	0	1598	96.35	3.78	0.765	0.3	111105
Clear-cut strip	20	26	13:00-14:00	Large	c-20-1	3.6051	0.0758513	1.9795	269	2.5	6	1	2.84	33.44	34.6	33.25	366.83	361.17	28.852	31.374	53.68	58.38	499.9	0	1598	96.35	3.78	0.765	0.3	111105
Clear-cut strip	20	26	13:00-14:00	Large	c-20-1	3.27104	0.0876755	2.17434	267	2.5	6	1	2.84	33.44	34.6	33.26	366.81	361.05	28.842	31.363	53.66	58.35	499.9	0	1598	96.35	3.78	0.765	0.3	111105
Clear-cut strip	20	26	13:00-14:00	Large	c-20-1	0.929499	0.0290017	0.910437	311	2.5	6	1	2.84	35.62	35.4	35.65	388.77	387.2	32.925	33.772	54.54	55.94	499.9	0	550	96.84	290	21.7	0.7	111105
Clear-cut strip	20	26	13:00-14:00	Large	c-20-1	0.847812	0.0245943	0.601651	311	2.5	6	1	2.84	35.62	35.4	35.65	388.77	387.2	32.925	33.772	54.54	55.94	499.9	0	550	96.84	290	21.7	0.7	111105
Clear-cut strip	20	26	13:00-14:00	Large	c-20-1	1.53614	0.0327568	0.860147	308	2.5	6	1	2.84	35.62	35.4	35.65	388.76	387.11	32.922	33.771	54.53	55.94	499.9	0	547	96.84	290	21.7	0.7	111105
Clear-cut strip	20	26	13:00-14:00	Large	c-20-1	0.320929	0.0191014	0.789042	307	2.51	6	1	2.84	35.62	35.41	35.65	388.73	387.05	32.919	33.776	54.54	55.96	500	0	547	96.84	290	21.7	0.7	111105
Clear-cut strip	20	26	13:00-14:00	Large	c-20-1	1.20924	0.0373325	0.878649	306	2.51	6	1	2.84	35.62	35.41	35.65	388.71	387.01	32.917	33.776	54.54	55.96	500	0	551	96.84	290	21.7	0.7	111105
Clear-cut strip	20	14	13:00-14:00	Medium	c-20-2	3.65135	0.0736306	1.98557	250	2.68	6	1	2.84	33.66	34.77	33.49	364.51	358.93	27.863	30.112	51.2	55.34	499.9	0	1251	96.35	3.78	0.765	1	111105
Clear-cut strip	20	14	13:00-14:00	Medium	c-20-2	3.63017	0.0604451	1.82202	249	2.68	6	1	2.84	33.67	34.77	33.49	364.53	358.92	27.867	30.11	51.2	55.32	499.9	0	1250	96.35	3.78	0.765	1	111105
Clear-cut strip	20	14	13:00-14:00	Medium	c-20-2	4.29833	0.0756135	2.02154	248	2.68	6	1	2.84	33.67	34.78	33.5	364.49	358.9	27.867	30.094	51.19	55.28	499.9	0	1248	96.35	3.78	0.765	1	111105
Clear-cut strip	20	14	13:00-14:00	Medium	c-20-2	3.5896	0.0591163	2.04619	245	2.68	6	1	2.84	33.67	34.79	33.5	364.5	358.76	27.872	30.101	51.19	55.29	499.9	0	1244	96.35	3.78	0.765	1	111105
Clear-cut strip	20	14	13:00-14:00	Medium	c-20-2	4.18399	0.0564116	1.83607	244	2.69	6	1	2.84	33.68	34.8	33.5	364.51	358.77	27.881	30.084	51.2	55.24	499.9	0	1242	96.35	3.78	0.765	1	111105
Clear-cut strip	20	14	13:00-14:00	Medium	c-20-2	1.74928	0.049648	0.996301	317	2.45	6	1	2.84	35.36	35.12	35.39	387.99	385.75	32.118	33.428	53.99	56.19	499.9	0	549	96.84	290	21.7	0.7	111105
Clear-cut strip	20	14	13:00-14:00	Medium	c-20-2	0.628708	0.0404463	1.29028	318	2.45	6	1	2.84	35.36	35.12	35.39	387.96	385.73	32.117	33.43	53.99	56.19	499.9	0	549	96.84	290	21.7	0.7	111105
Clear-cut strip	20	14	13:00-14:00	Medium	c-20-2	1.97945	0.0501075	1.33652	318	2.45	6	1	2.84	35.36	35.12	35.39	387.95	385.71	32.117	33.435	53.99	56.21	499.9	0	549	96.84	290	21.7	0.7	111105
Clear-cut strip	20	14	13:00-14:00	Medium	c-20-2	1.51024	0.0438037	1.32137	318	2.45	6	1	2.84	35.36	35.12	35.39	387.9	385.66	32.115	33.434	53.98	56.2	499.9	0	549	96.84	290	21.7	0.7	111105
Clear-cut strip	20	14	13:00-14:00	Medium	c-20-2	2.2638	0.0350271	1.00607	315	2.45	6	1	2.84	35.36	35.11	35.39	387.92	385.6	32.118	33.435	53.99	56.21	499.9	0	549	96.84	290	21.7	0.7	111105
Clear-cut strip	20	15	13:00-14:00	Small	c-20-3	4.6816	0.0884707	2.33764	266	2.7	6	1	2.84	34.08	35.01	33.85	363.61	357.73	27.795	30.635	49.91	55.01	499.9	0	1273	96.36	3.78	0.765	0.7	111105
Clear-cut strip	20	15	13:00-14:00	Small	c-20-3	3.52178	0.0794539	2.28479	267	2.71	6	1	2.84	34.08	35.03	33.86	363.6	357.76	27.803	30.645	49.9	55.01	499.9	0	1275	96.36	3.78	0.765	0.7	111105
Clear-cut strip	20	15	13:00-14:00	Small	c-20-3	3.38614	0.0924029	2.50827	264	2.71	6	1	2.84	34.1	35.04	33.87	363.63	357.7	27.815	30.634	49.89	54.95	499.9	0	1276	96.36	3.78	0.765	1	111105
Clear-cut strip	20	15	13:00-14:00	Small	c-20-3	4.85623	0.0864099	2.56618	263	2.71	6	1	2.84	34.1	35.03	33.87	363.66	357.67	27.832	30.633	49.9	54.92	499.9	0	1272	96.36	3.78	0.765	1	111105
Clear-cut strip	20	15	13:00-14:00	Small	c-20-3	3.92729	0.0888283	2.31361	262	2.7	6	1	2.84	34.13	35.01	33.88	363.71	357.7	27.856	30.631	49.88	54.85	499.9	0	1274	96.36	3.78	0.765	1	111105
Clear-cut strip	20	15	13:00-14:00	Small	c-20-3	2.39638	0.0507297	1.2646	306	2.4	6	1	2.84	35.39	35.12	35.4	390	387.14	32.491	33.885	54.51	56.85	499.9	0	485	96.85	290	21.7	0.7	111105
Clear-cut strip	20	15	13:00-14:00	Small	c-20-3	1.93129	0.043114	1.25423	306	2.4	6	1	2.84	35.39	35.12	35.4	390	387.14	32.491	33.885	54.51	56.85	499.9	0	485	96.85	290	21.7	0.7	111105
Clear-cut strip	20	15	13:00-14:00	Small	c-20-3	2.11415	0.0536497	1.19482	306	2.4	6	1	2.84	35.39	35.12	35.4	390.01	387.12	32.508	33.901	54.54	56.88	499.9	0	486	96.85	290	21.7	0.7	111105
Clear-cut strip	20	15	13:00-14:00	Small	c-20-3	1.34218	0.047998	1.01925	306	2.4	6	1	2.84	35.39	35.12	35.4	389.97	387.11	32.513	33.903	54.55	56.88	499.9	0	486	96.85	290	21.7	1	111105
Clear-cut strip	20	15	13:00-14:00	Small	c-20-3	2.14003	0.054877	1.25986	306	2.4	6	1	2.84	35.39	35.11	35.4	389.98	387.1	32.521	33.909	54.56	56.89	499.9	0	487	96.85	290	21.7	1	111105
Clear-cut strip	20	26	14:30-15:30	Large	c-20-1	2.11713	0.155206	2.17649	348	1.4	6	1	2.84	31.99	30.97	31.98	379.62	376.29	29.521	32.207	59.58	65.01	499.9	0	260	96.32	47.1	-0.0292	0.7	111105
Clear-cut strip	20	26	14:30-15:30	Large	c-20-1	1.59359	0.157431	2.21322	348	1.4	6	1	2.84	31.99	30.97	31.98	379.62	376.29	29.521	32.207	59.58	65.01	499.9	0	260	96.32	47.1	-0.0292	0.7	111105
Clear-cut strip	20	26	14:30-15:30	Large	c-20-1	2.42656	0.167788	2.1598	348	1.4	6	1	2.84	31.99	30.98	31.98	379.6	376.31	29.521	32.21	59.6	65.03	499.9	0	261	96.32	47.1	-0.0292	0.7	111105
Clear-cut strip	20	26	14:30-15:30	Large	c-20-1	2.15368	0.152762	2.19642	348	1.4	6	1	2.84	31.99	30.98	31.98	379.57	376.27	29.521	32.209	59.59	65.02	499.9	0	260	96.32	47.1	-0.0292	0.7	111105
Clear-cut strip	20	26	14:30-15:30	Large	c-20-1	1.20135	0.156203	2.25189	348	1.4	6	1	2.84	31.99	30.98	31.98	379.56	376.24	29.518	32.199	59.57	64.98	499.9	0	258	96.32	47.1	-0.0292	0.7	111105
Clear-cut strip	20	26	14:30-15:30	Large	c-20-1	0.101641	0.0583644	0.820961	368	1.49	6	1	2.84	31.68	31.38	31.71	385.57	384.92	31.352	32.263	64.7	66.58	499.9	0	229	96.78	287	21.4	0.7	111105
Clear-cut strip	20	26	14:30-15:30	Large	c-20-1	0.0885795	0.0565488	0.779187	370	1.49	6	1	2.84	31.68	31.38	31.71	385.56	384.99	31.353	32.265	64.69	66.57	499.9	0	227	96.78	287	21.4	0.7	111105
Clear-cut strip	20	26	14:30-15:30	Large	c-20-1	-0.14466	0.042248	0.598795	368	1.49	6	1	2.84	31.69	31.38	31.71	385.54	384.9	31.352	32.268	64.68	66.57	499.9	0	227	96.78	287	21.4	0.7	111105
Clear-cut strip	20	26	14:30-15:30	Large	c-20-1	0.756309	0.0567089	0.591578	368	1.49	6	1	2.84	31.69	31.38	31.71	385.55	384.9	31.354	32.269	64.68	66.57	499.9	0	226	96.78	287	21.4	0.7	111105
Clear-cut strip	20	26	14:30-15:30	Large	c-20-1	-0.35296	0.0588394	0.733469	368	1.49	6	1	2.84	31.69	31.38	31.71	385.48	384.84	31.354	32.273	64.67	66.57	499.9	0	224	96.78	287	21.4	0.7	111105
Clear-cut strip	20	14	14:30-15:30	Medium	c-20-2	2.05204	0.136779	1.92308	333	1.41	6	1	2.84	31.91	31	31.92	382.38	378.17	30.005	32.189	60.83	65.26	499.9	0	269	96.33	47.1	-0.0292	1	111105
Clear-cut strip	20	14	14:30-15:30	Medium	c-20-2	2.99144	0.125007	1.74125	334	1.41	6	1	2.84	31.91	30.99	31.92	382.4	378.2	30.001	32.196	60.83	65.28	499.9	0	267	96.33	47.1	-0.0292	1	111105
Clear-cut strip	20	14	14:30-15:30	Medium	c-20-2	2.32116	0.139945	2.00545	333	1.41	6	1	2.84	31.91	30.99	31.92	382.44	378.14	29.996	32.189	60.82	65.26	499.9	0	265	96.33	47.1	-0.0292	1	111105
Clear-cut strip	20	14	14:30-15:30	Medium	c-20-2	2.45998	0.135322	1.81783	332	1.4	6	1	2.84	31.91	30.98	31.92	382.49	378.13	29.99	32.188	60.81	65.27	499.9	0	263	96.33	47.1	-0.0292	1	111105
Clear-cut strip	20	14	14:30-15:30	Medium	c-20-2	2.33752	0.129286	1.72132	332	1.4	6	1	2.84	31.92	30.97	31.92	382.55	378.12	29.981	32.184	60.77	65.23	499.9	0	262	96.33	47.1	-0.0292	0.7	111105
Clear-cut strip	20	14	14:30-15:30	Medium	c-20-2	0.919213	0.0530968	0.77544	340	1.52	6	1	2.84	31.75	31.6	31.78	383.57	381.84	31.472	32.514	64.68	66.83	499.9	0	341	96.78	287	21.4	0.7	111105
Clear-cut strip	20	14	14:30-15:30	Medium	c-20-2	1.56663	0.0577908	0.888496	343	1.52	6	1	2.84	31.75	31.6	31.78	383.56	381.92	31.474	32.509	64.69	66.81	499.9	0	341	96.78	287	21.4	0.7	111105
Clear-cut strip	20	14	14:30-15:30	Medium	c-20-2	0.712111	0.0519667	0.966702	342	1.52	6	1	2.84	31.76	31.59	31.78	383.52	381.88	31.483	32.506	64.7	66.8	499.9	0	341	96.78	287	21.4	0.7	111105
Clear-cut strip	20	14	14:30-15:30	Medium	c-20-2	1.30923	0.0568335	0.837877	342	1.52	6	1	2.84	31.76	31.59	31.78	383.5	381.86	31.49	32.508	64.71	66.8	499.9	0	341	96.78	287	21.4	0.7	111105
Clear-cut strip	20	14	14:30-15:30	Medium	c-20-2	0.821222	0.047681	0.732406	342	1.52	6	1	2.84	31.76	31.59	31.78	383.51	381.89	31.491	32.505	64.71	66.79	499.8	0	341	96.78	287	21.4	0.7	111105
Clear-cut strip	20	15	14:30-15:30	Small	c-20-3	1.46888	0.0675374	0.960521	352	1.45	6	1	2.84	31.83	31.44	31.82	385.01	383.55	31.707	32.817	64.89	67.16	499.9	0	258	96.78	287	21.4	0.7	111105
Clear-cut strip	20	15	14:30-15:30	Small	c-20-3	1.1706	0.0542489	0.999173	352	1.45	6	1	2.84	31.83	31.44	31.82	385.01	383.55	31.707	32.817	64.89	67.16	499.9	0	258	96.78	287	21.4	0.7	111105
Clear-cut strip	20	15	14:30-15:30	Small	c-20-3	1.01118	0.0721776	0.761446	351	1.45	6	1	2.84	31.83	31.43	31.82	385.03	383.5	31.709	32.814	64.88	67.14	499.9	0	258	96.78	287	21.4	0.7	111105
Clear-cut strip	20	15	14:30-15:30	Small	c-20-3	1.67211	0.0563204	0.865473	350	1.45	6	1	2.84	31.84	31.42	31.82	385.03	383.48	31.711	32.818	64.87	67.13	499.9	0	258	96.78	287	21.4	0.7	111105
Clear-cut strip	20	15	14:30-15:30	Small	c-20-3	1.62804	0.0693	0.948395	351	1.45	6	1	2.84	31.85	31.42	31.83	384.99	383.49	31.712	32.81	64.84	67.08	499.8	0	257	96.78	287	21.4	0.7	111105
Clear-cut strip	20	15	14:30-15:30	Small	c-20-3	2.67804	0.112393	2.13286	328	1.55	6	1	2.84	31.97	31.54	31.98	379.95	375.72	29.92	32.182	60.47	65.04	499.9	0	365	96.33	47.1	-0.0292	0.7	111105
Clear-cut strip	20	15	14:30-15:30	Small	c-20-3	2.31583	0.124347	1.80833	329	1.55	6	1	2.84	31.97	31.54	31.98	379.99	375.83	29.93	32.197	60.48	65.06	499.9	0	365	96.33	47.1	-0.0292	0.7	111105
Clear-cut strip	20	15	14:30-15:30	Small	c-20-3	3.33186	0.112759	2.0139	330	1.55	6	1	2.84	31.97	31.54	31.98	379.98	375.87	29.938	32.216	60.51	65.11	499.9	0	364	96.33	47.1	-0.0292	0.7	111105
Clear-cut strip	20	15	14:30-15:30	Small	c-20-3	2.84997	0.12409	2.15088	329	1.55	6	1	2.84	31.97	31.54	31.98	380	375.83	29.946	32.227	60.51	65.12	499.9	0	363	96.33	47.1	-0.0292	0.7	111105
Clear-cut strip	20	15	14:30-15:30	Small	c-20-3	2.03211	0.130999	1.99244	329	1.55	6	1	2.84	31.98	31.54	31.98	380.04	375.82	29.948	32.227	60.5	65.1	499.9	0	363	96.33	47.1	-0.0292	0.7	111105
Clear-cut strip	15	25	9:30-10:30	Large	c-15-1	3.67066	0.0707664	1.01646	340	1.42	6	1	2.84	31.61	31.18	31.55	423.53	419.11	31.07	32.372	64.46	67.16	499.9	0	319	96.9	296	21.1	0.7	111105
Clear-cut strip	15	25	9:30-10:30	Large	c-15-1	2.56387	0.0692893	0.97532	339	1.42	6	1	2.84	31.63	31.18	31.56	423.47	419.03	31.07	32.367	64.38	67.07	499.9	0	318	96.9	296	21.1	0.7	111105
Clear-cut strip	15	25	9:30-10:30	Large	c-15-1	2.45881	0.0759719	1.3002	341	1.42	6	1	2.84	31.64	31.19	31.57	423.34	419.02	31.075	32.366	64.35	67.02	499.9	0	315	96.9	296	21.1	0.7	111105
Clear-cut strip	15	25	9:30-10:30	Large	c-15-1	3.09439	0.0734667	0.931815	341	1.42	6	1	2.84	31.64	31.19	31.57	423.34	419.02	31.075	32.366	64.35	67.02	499.9	0	315	96.9	296	21.1	0.7	111105
Clear-cut strip	15	25	9:30-10:30	Large	c-15-1	3.1676	0.074496	1.10458	344	1.42	6	1	2.84	31.64	31.19	31.57	423.15	419	31.077	32.369	64.35	67.03	499.9	0	313	96.9	296	21.1	0.7	111105
Clear-cut strip	15	17	9:30-10:30	Medium	c-15-2	2.33513	0.0755826	1.16027	345	1.52	6	1	2.84	32.09	31.68	32.07	403.35	400.29	31.28	32.671	63.14	65.95	499.9	0	433	96.89	291	21.2	1	111105
Clear-cut strip	15	17	9:30-10:30	Medium	c-15-2	2.20495	0.0746742	1.27703	346	1.52	6	1	2.84	32.1	31.69	32.07	403.39	400.33	31.281	32.676	63.13	65.94	499.9	0	433	96.89	291	21.2	1	111105
Clear-cut strip	15	17	9:30-10:30	Medium	c-15-2	1.72502	0.0766854	1.36536	346	1.52	6	1	2.84	32.1	31.69	32.07	403.39	400.33	31.281	32.676	63.13	65.94	499.9	0	433	96.89	291	21.2	1	111105
Clear-cut strip	15	17	9:30-10:30	Medium	c-15-2	1.71716	0.0763227	1.1446	343	1.53	6	1	2.84	32.11	31.69	32.08	403.48	400.3	31.287	32.675	63.1	65.9	499.9	0	434	96.89	291	21.2	1	111105
Clear-cut strip	15	17	9:30-10:30	Medium	c-15-2	2.82524	0.0652348	1.0437	343	1.52	6	1	2.84	32.12	31.68	32.08	403.54	400.35	31.294	32.681	63.08	65.87	499.9	0	435	96.89	291	21.2	1	111105
Clear-cut strip	15	15	9:30-10:30	Small	c-15-3	10.0356	0.0139309	0.052697	-620	1.45	6	1	2.84	31.39	30.96	31.36	423	411.64	31.218	31.481	65.59	66.14	499.9	0	299	96.89	290	20.2	0.7	111105
Clear-cut strip	15	15	9:30-10:30	Small	c-15-3	10.2264	0.0204271	0.216941	-675	1.45	6	1	2.84	31.39	30.95	31.36	423.1	411.58	31.224	31.476	65.6	66.13	499.9	0	302	96.89	290	20.2	0.7	111105
Clear-cut strip	15	15	9:30-10:30	Small	c-15-3	9.56354	0.00380045	0.0130319	-751	1.45	6	1	2.84	31.39	30.94	31.36	423.25	411.62	31.229	31.467	65.6	66.1	499.9	0	306	96.89	290	20.2	0.7	111105
Clear-cut strip	15	15	9:30-10:30	Small	c-15-3	10.0797	0.0149463	0.127598	-751	1.45	6	1	2.84	31.39	30.94	31.36	423.25	411.62	31.229	31.467	65.6	66.1	499.9	0	306	96.89	290	20.2	0.7	111105
Clear-cut strip	15	15	9:30-10:30	Small	c-15-3	9.04451	0.00434846	0.354635	-796	1.44	6	1	2.84	31.38	30.93	31.36	423.58	411.67	31.238	31.472	65.64	66.13	499.9	0	307	96.89	290	20.2	1	111105
Clear-cut strip	15	25	11:00-12:00	Large	c-15-1	4.9392	0.0788648	3.96927	238	4.39	6	1	2.84	40.49	40.63	40.41	363.75	356.47	29.612	34.009	37.51	43.08	499.9	0	1175	96.39	2.44	0.458	0.7	111105
Clear-cut strip	15	25	11:00-12:00	Large	c-15-1	5.13394	0.0809648	3.73968	238	4.39	6	1	2.84	40.49	40.64	40.41	363.73	356.47	29.609	34.005	37.5	43.07	499.9	0	1174	96.39	2.44	0.458	0.7	111105
Clear-cut strip	15	25	11:00-12:00	Large	c-15-1	3.95736	0.0731724	3.95553	239	4.4	6	1	2.84	40.49	40.65	40.41	363.73	356.49	29.603	34	37.49	43.06	499.9	0	1175	96.39	2.44	0.458	0.7	111105
Clear-cut strip	15	25	11:00-12:00	Large	c-15-1	4.67527	0.0888439	3.79765	237	4.4	6	1	2.84	40.49	40.65	40.41	363.74	356.43	29.598	34.003	37.48	43.06	499.9	0	1177	96.39	2.44	0.458	0.7	111105
Clear-cut strip	15	25	11:00-12:00	Large	c-15-1	4.50093	0.0788258	3.79625	234	4.4	6	1	2.84	40.49	40.66	40.41	363.83	356.27	29.578	34.012	37.47	43.09	499.9	0	1189	96.39	2.44	0.458	0.7	111105
Clear-cut strip	15	25	11:00-12:00	Large	c-15-1	6.78555	0.0106223	0.137931	-796	2.47	6	1	2.84	34.8	35.12	34.77	405.32	397.23	32.886	33.16	57.02	57.5	500	0	995	96.87	290	20.4	0.7	111105
Clear-cut strip	15	25	11:00-12:00	Large	c-15-1	6.49936	0.010726	0.292018	-796	2.47	6	1	2.84	34.8	35.12	34.77	405.32	397.23	32.886	33.16	57.02	57.5	500	0	995	96.87	290	20.4	0.7	111105
Clear-cut strip	15	25	11:00-12:00	Large	c-15-1	7.3811	0.00352005	0.341995	-849	2.48	6	1	2.84	34.8	35.13	34.77	405.28	397.23	32.893	33.155	57.03	57.49	500	0	994	96.87	290	20.4	0.7	111105
Clear-cut strip	15	25	11:00-12:00	Large	c-15-1	7.02074	0.00061541	0.240329	-902	2.48	6	1	2.84	34.8	35.13	34.77	405.29	397.21	32.896	33.148	57.03	57.47	500	0	993	96.87	290	20.4	0.7	111105
Clear-cut strip	15	25	11:00-12:00	Large	c-15-1	7.06119	0.0165806	0.035788	-1070	2.48	6	1	2.84	34.81	35.13	34.77	405.38	397.19	32.903	33.13	57.03	57.43	500	0	994	96.87	290	20.4	0.7	111105
Clear-cut strip	15	17	11:00-12:00	Medium	c-15-2	5.12974	0.0980765	4.2282	232	4.32	6	1	2.84	40.13	40.53	39.96	368.52	359.82	29.564	34.34	38.17	44.33	499.9	0	1619	96.39	2.44	0.458	0.7	111105
Clear-cut strip	15	17	11:00-12:00	Medium	c-15-2	5.12415	0.0984935	4.00669	232	4.31	6	1	2.84	40.13	40.52	39.97	368.45	359.81	29.575	34.342	38.18	44.33	499.9	0	1604	96.39	2.44	0.458	0.7	111105
Clear-cut strip	15	17	11:00-12:00	Medium	c-15-2	6.07921	0.0905425	4.23264	234	4.3	6	1	2.84	40.13	40.5	39.96	368.31	359.78	29.588	34.355	38.21	44.36	499.9	0	1576	96.39	2.44	0.458	0.7	111105
Clear-cut strip	15	17	11:00-12:00	Medium	c-15-2	4.93792	0.0813586	3.9555	233	4.3	6	1	2.84	40.12	40.49	39.96	368.17	359.54	29.606	34.382	38.24	44.41	499.9	0	1571	96.39	2.44	0.458	0.3	111105
Clear-cut strip	15	17	11:00-12:00	Medium	c-15-2	5.38316	0.088724	4.1732	233	4.29	6	1	2.84	40.12	40.49	39.96	368.13	359.5	29.612	34.392	38.25	44.42	499.9	0	1579	96.39	2.44	0.458	0.3	111105
Clear-cut strip	15	17	11:00-12:00	Medium	c-15-2	1.01657	0.0741425	2.03587	341	2.22	6	1	2.84	35.15	34.94	35.06	393.7	390.64	32.994	35.207	56.11	59.87	499.9	0	825	96.87	293	22	0.7	111105
Clear-cut strip	15	17	11:00-12:00	Medium	c-15-2	1.52279	0.0722293	1.71367	341	2.22	6	1	2.84	35.15	34.94	35.06	393.7	390.64	32.994	35.207	56.11	59.87	499.9	0	825	96.87	293	22	0.7	111105
Clear-cut strip	15	17	11:00-12:00	Medium	c-15-2	1.80615	0.0723052	2.00196	340	2.22	6	1	2.84	35.15	34.94	35.06	393.66	390.55	32.988	35.21	56.11	59.89	499.9	0	825	96.87	293	22	0.7	111105
Clear-cut strip	15	17	11:00-12:00	Medium	c-15-2	2.12721	0.0861222	1.73611	339	2.22	6	1	2.84	35.15	34.94	35.06	393.59	390.44	32.982	35.209	56.09	59.88	499.9	0	811	96.87	293	22	0.7	111105
Clear-cut strip	15	17	11:00-12:00	Medium	c-15-2	1.24333	0.0834202	1.82411	340	2.22	6	1	2.84	35.15	34.93	35.07	393.5	390.4	32.976	35.208	56.08	59.87	499.9	0	799	96.87	293	22	0.7	111105
Clear-cut strip	15	15	11:00-12:00	Small	c-15-3	1.355	0.093258	2.06872	341	2.21	6	1	2.84	35.14	34.79	35.11	392	388.9	32.45	34.79	55.23	59.21	499.9	0	562	96.87	293	22	0.7	111105
Clear-cut strip	15	15	11:00-12:00	Small	c-15-3	1.96324	0.0884409	1.87964	340	2.21	6	1	2.84	35.13	34.79	35.11	392.03	388.89	32.453	34.792	55.24	59.22	499.9	0	562	96.87	293	22	0.7	111105
Clear-cut strip	15	15	11:00-12:00	Small	c-15-3	2.31796	0.0884549	1.97568	340	2.21	6	1	2.84	35.14	34.79	35.11	392.06	388.89	32.454	34.793	55.23	59.21	499.9	0	563	96.87	293	22	0.7	111105
Clear-cut strip	15	15	11:00-12:00	Small	c-15-3	1.89886	0.0829736	1.9053	339	2.21	6	1	2.84	35.14	34.8	35.11	392.07	388.84	32.455	34.792	55.22	59.2	499.9	0	563	96.87	293	22	0.7	111105
Clear-cut strip	15	15	11:00-12:00	Small	c-15-3	2.72409	0.0913009	1.87204	338	2.21	6	1	2.84	35.15	34.8	35.11	392.13	388.84	32.457	34.805	55.21	59.21	499.9	0	564	96.87	293	22	0.7	111105
Clear-cut strip	15	15	11:00-12:00	Small	c-15-3	5.46623	0.0850131	3.41005	241	4.03	6	1	2.84	39.66	39.53	39.56	369.2	362.03	29.353	33.254	38.86	44.02	499.9	0	1424	96.39	2.44	0.458	0.7	111105
Clear-cut strip	15	15	11:00-12:00	Small	c-15-3	4.52509	0.0728471	3.18566	241	4.02	6	1	2.84	39.67	39.53	39.56	369.17	361.97	29.347	33.265	38.84	44.02	499.9	0	1422	96.39	2.44	0.458	0.7	111105
Clear-cut strip	15	15	11:00-12:00	Small	c-15-3	4.81716	0.0787943	3.47607	242	4.02	6	1	2.84	39.67	39.53	39.56	369.15	362	29.341	33.272	38.82	44.02	499.9	0	1420	96.39	2.44	0.458	0.7	111105
Clear-cut strip	15	15	11:00-12:00	Small	c-15-3	4.0047	0.0746129	3.52079	242	4.02	6	1	2.84	39.67	39.53	39.56	369.16	361.96	29.333	33.275	38.81	44.02	499.9	0	1420	96.39	2.44	0.458	0.7	111105
Clear-cut strip	15	15	11:00-12:00	Small	c-15-3	5.38479	0.0872046	3.51023	242	4.02	6	1	2.84	39.68	39.53	39.57	369.13	361.95	29.317	33.258	38.78	43.99	499.9	0	1420	96.39	2.44	0.458	0.7	111105
Clear-cut strip	15	25	13:00-14:00	Large	c-15-1	3.48525	0.0741766	2.32106	282	2.85	6	1	2.84	34.83	35.77	34.7	367.21	362.62	28.957	31.602	49.85	54.4	499.9	0	1572	96.32	3.78	0.765	0.7	111105
Clear-cut strip	15	25	13:00-14:00	Large	c-15-1	3.26065	0.0805896	2.39693	278	2.84	6	1	2.84	34.84	35.75	34.71	367.04	362.22	28.949	31.629	49.81	54.43	499.9	0	1572	96.32	3.78	0.765	0.7	111105
Clear-cut strip	15	25	13:00-14:00	Large	c-15-1	2.59505	0.0670473	2.43511	278	2.84	6	1	2.84	34.84	35.75	34.71	366.94	362.09	28.946	31.636	49.8	54.43	499.9	0	1574	96.32	3.78	0.765	0.7	111105
Clear-cut strip	15	25	13:00-14:00	Large	c-15-1	3.98761	0.081649	2.17094	276	2.84	6	1	2.84	34.84	35.76	34.72	366.86	361.85	28.942	31.654	49.78	54.44	499.9	0	1576	96.32	3.78	0.765	0.7	111105
Clear-cut strip	15	25	13:00-14:00	Large	c-15-1	3.76801	0.0823037	2.43104	275	2.85	6	1	2.84	34.85	35.79	34.73	366.65	361.66	28.929	31.638	49.73	54.39	499.9	0	1580	96.32	3.78	0.765	0.7	111105
Clear-cut strip	15	25	13:00-14:00	Large	c-15-1	0.341692	0.0465824	1.18737	340	2.13	6	1	2.84	35.02	34.35	35.05	388.28	386.45	32.918	34.295	56.37	58.73	499.9	0	491	96.83	290	21.7	0.7	111105
Clear-cut strip	15	25	13:00-14:00	Large	c-15-1	0.547423	0.0557935	1.2008	339	2.13	6	1	2.84	35.02	34.35	35.05	388.25	386.38	32.917	34.299	56.37	58.74	499.9	0	490	96.83	290	21.7	0.7	111105
Clear-cut strip	15	25	13:00-14:00	Large	c-15-1	0.318988	0.0563971	1.02791	339	2.13	6	1	2.84	35.02	34.36	35.05	388.13	386.25	32.925	34.301	56.39	58.74	499.9	0	488	96.83	290	21.7	0.7	111105
Clear-cut strip	15	25	13:00-14:00	Large	c-15-1	0.589559	0.0553921	1.14748	340	2.13	6	1	2.84	35.02	34.36	35.05	388.01	386.17	32.924	34.298	56.39	58.74	499.9	0	485	96.83	290	21.7	0.7	111105
Clear-cut strip	15	25	13:00-14:00	Large	c-15-1	1.29034	0.0597551	1.31987	338	2.13	6	1	2.84	35.02	34.37	35.05	387.97	386.07	32.928	34.305	56.39	58.75	499.9	0	485	96.83	290	21.7	0.7	111105
Clear-cut strip	15	17	13:00-14:00	Medium	c-15-2	3.49761	0.0782435	2.40749	261	2.91	6	1	2.84	35.42	36.13	35.24	361.87	356.1	29.362	32.253	48.92	53.74	499.9	0	1451	96.32	3.78	0.765	0.3	111105
Clear-cut strip	15	17	13:00-14:00	Medium	c-15-2	3.85534	0.083642	2.38362	260	2.91	6	1	2.84	35.4	36.14	35.24	361.83	356.01	29.352	32.234	48.97	53.77	499.9	0	1459	96.32	3.78	0.765	0.3	111105
Clear-cut strip	15	17	13:00-14:00	Medium	c-15-2	4.68118	0.0861105	2.34971	259	2.91	6	1	2.84	35.38	36.15	35.24	361.75	355.93	29.34	32.217	48.98	53.78	499.9	0	1466	96.32	3.78	0.765	0.3	111105
Clear-cut strip	15	17	13:00-14:00	Medium	c-15-2	3.55649	0.0722834	2.52707	260	2.92	6	1	2.84	35.37	36.15	35.24	361.67	355.89	29.328	32.206	48.99	53.79	499.9	0	1472	96.32	3.78	0.765	0.3	111105
Clear-cut strip	15	17	13:00-14:00	Medium	c-15-2	3.40165	0.0747346	2.35429	258	2.93	6	1	2.84	35.38	36.18	35.24	361.58	355.73	29.319	32.188	48.96	53.75	499.9	0	1481	96.32	3.78	0.765	0.3	111105
Clear-cut strip	15	17	13:00-14:00	Medium	c-15-2	1.70496	0.049046	1.27482	306	2.23	6	1	2.84	34.9	34.58	34.93	389.13	385.8	32.469	33.994	55.98	58.61	499.9	0	425	96.82	290	21.7	0.7	111105
Clear-cut strip	15	17	13:00-14:00	Medium	c-15-2	2.3207	0.0592446	1.16746	306	2.23	6	1	2.84	34.9	34.58	34.93	389.13	385.8	32.469	33.994	55.98	58.61	499.9	0	425	96.82	290	21.7	0.7	111105
Clear-cut strip	15	17	13:00-14:00	Medium	c-15-2	1.73667	0.0621321	1.44893	307	2.23	6	1	2.84	34.9	34.58	34.93	389.2	385.91	32.477	33.994	55.99	58.61	499.9	0	424	96.82	290	21.7	0.7	111105
Clear-cut strip	15	17	13:00-14:00	Medium	c-15-2	1.69778	0.0579422	1.10194	304	2.23	6	1	2.84	34.9	34.58	34.93	389.41	386.02	32.489	33.995	56.01	58.61	499.9	0	423	96.82	290	21.7	0.7	111105
Clear-cut strip	15	17	13:00-14:00	Medium	c-15-2	2.88925	0.0498683	1.42197	304	2.23	6	1	2.84	34.9	34.58	34.93	389.53	386.14	32.501	34.005	56.03	58.62	499.9	0	422	96.82	290	21.7	0.7	111105
Clear-cut strip	15	15	13:00-14:00	Small	c-15-3	0.505885	0.0560114	1.28354	346	2.01	6	1	2.84	34.78	33.95	34.74	383.85	382.08	32.597	34.218	56.56	59.37	499.9	0	420	96.83	290	21.7	0.7	111105
Clear-cut strip	15	15	13:00-14:00	Small	c-15-3	1.36143	0.0666824	1.47312	346	2.01	6	1	2.84	34.79	33.95	34.74	383.86	382.08	32.593	34.223	56.54	59.37	499.9	0	421	96.83	290	21.7	0.7	111105
Clear-cut strip	15	15	13:00-14:00	Small	c-15-3	0.644634	0.0719891	1.49496	346	2.02	6	1	2.84	34.79	33.95	34.74	383.87	382.08	32.589	34.222	56.53	59.36	499.9	0	422	96.82	290	21.7	0.7	111105
Clear-cut strip	15	15	13:00-14:00	Small	c-15-3	0.674293	0.0676792	1.60248	347	2.01	6	1	2.84	34.79	33.95	34.74	383.84	382.08	32.585	34.227	56.52	59.37	499.9	0	421	96.82	290	21.7	0.7	111105
Clear-cut strip	15	15	13:00-14:00	Small	c-15-3	0.72679	0.0637626	1.23124	348	2.01	6	1	2.84	34.79	33.95	34.75	383.84	382.14	32.577	34.234	56.5	59.38	499.9	0	421	96.82	290	21.7	0.7	111105
Clear-cut strip	15	15	13:00-14:00	Small	c-15-3	4.82748	0.0821982	2.1916	245	2.88	6	1	2.84	35.85	36.19	35.67	359.26	353	29.98	32.712	48.78	53.23	499.9	0	569	96.32	3.78	0.765	0.7	111105
Clear-cut strip	15	15	13:00-14:00	Small	c-15-3	4.0173	0.0765239	2.19089	248	2.85	6	1	2.84	35.86	36.1	35.67	359.31	353.12	29.957	32.699	48.71	53.17	499.9	0	536	96.32	3.78	0.765	0.7	111105
Clear-cut strip	15	15	13:00-14:00	Small	c-15-3	4.68236	0.0877937	2.45729	251	2.83	6	1	2.84	35.84	36.03	35.67	359.25	353.22	29.936	32.676	48.74	53.2	499.9	0	540	96.32	3.78	0.765	0.7	111105
Clear-cut strip	15	15	13:00-14:00	Small	c-15-3	3.56145	0.0741087	2.22813	251	2.83	6	1	2.84	35.83	36.02	35.67	359.23	353.23	29.928	32.661	48.74	53.2	499.9	0	536	96.32	3.78	0.765	0.7	111105
Clear-cut strip	15	15	13:00-14:00	Small	c-15-3	3.99972	0.0747042	2.22465	250	2.84	6	1	2.84	35.82	36.04	35.66	359.19	353.18	29.917	32.638	48.77	53.2	499.9	0	504	96.32	3.78	0.765	0.7	111105
Clear-cut strip	15	25	14:30-15:30	Large	c-15-1	4.36113	0.156488	2.63896	316	1.73	6	1	2.84	32.25	32.41	32.22	384.15	377.17	29.56	32.804	58.79	65.24	499.9	0	892	96.3	47.1	-0.0292	0.7	111105
Clear-cut strip	15	25	14:30-15:30	Large	c-15-1	4.11454	0.160469	2.84561	316	1.73	6	1	2.84	32.25	32.42	32.22	384.14	377.13	29.564	32.797	58.79	65.22	499.9	0	895	96.3	47.1	-0.0292	0.7	111105
Clear-cut strip	15	25	14:30-15:30	Large	c-15-1	4.77072	0.149208	2.78515	314	1.73	6	1	2.84	32.25	32.42	32.22	384.11	377.03	29.569	32.786	58.79	65.19	499.9	0	901	96.3	47.1	-0.0292	0.7	111105
Clear-cut strip	15	25	14:30-15:30	Large	c-15-1	5.40031	0.159798	2.8761	314	1.73	6	1	2.84	32.25	32.43	32.23	384.07	376.99	29.574	32.785	58.79	65.17	499.9	0	907	96.3	47.1	-0.0292	0.7	111105
Clear-cut strip	15	25	14:30-15:30	Large	c-15-1	4.97333	0.148228	2.75523	314	1.73	6	1	2.84	32.25	32.43	32.23	384.07	376.99	29.574	32.785	58.79	65.17	499.9	0	907	96.3	47.1	-0.0292	0.7	111105
Clear-cut strip	15	25	14:30-15:30	Large	c-15-1	1.11223	0.0782154	1.12331	340	1.3	6	1	2.84	32.09	30.98	32.01	387.18	384.85	32.017	33.136	64.54	66.8	499.9	0	268	96.77	287	21.4	1	111105
Clear-cut strip	15	25	14:30-15:30	Large	c-15-1	1.00886	0.0652534	0.95112	340	1.3	6	1	2.84	32.09	30.98	32.01	387.18	384.85	32.017	33.136	64.54	66.8	499.9	0	268	96.77	287	21.4	1	111105
Clear-cut strip	15	25	14:30-15:30	Large	c-15-1	1.45996	0.0754808	1.07438	340	1.3	6	1	2.84	32.09	30.97	32.01	387.2	384.87	32.02	33.131	64.56	66.8	499.9	0	267	96.77	287	21.4	1	111105
Clear-cut strip	15	25	14:30-15:30	Large	c-15-1	1.16629	0.0642066	0.896671	340	1.3	6	1	2.84	32.09	30.97	32.01	387.17	384.83	32.02	33.133	64.55	66.79	499.9	0	265	96.77	287	21.4	1	111105
Clear-cut strip	15	25	14:30-15:30	Large	c-15-1	0.93286	0.0782398	0.891289	340	1.3	6	1	2.84	32.1	30.97	32.02	387.1	384.75	32.022	33.139	64.54	66.79	499.9	0	263	96.77	287	21.4	1	111105
Clear-cut strip	15	17	14:30-15:30	Medium	c-15-2	4.73567	0.19584	2.99417	328	1.54	6	1	2.84	32.67	31.7	32.63	383.96	376.91	29.184	32.791	56.68	63.69	499.9	0	345	96.3	47.1	-0.0292	0.7	111105
Clear-cut strip	15	17	14:30-15:30	Medium	c-15-2	4.37257	0.199718	3.19739	327	1.54	6	1	2.84	32.66	31.72	32.63	383.91	376.84	29.175	32.78	56.67	63.67	499.9	0	344	96.3	47.1	-0.0292	0.7	111105
Clear-cut strip	15	17	14:30-15:30	Medium	c-15-2	5.2286	0.189336	3.1816	327	1.55	6	1	2.84	32.66	31.73	32.63	383.86	376.91	29.174	32.733	56.67	63.58	499.9	0	342	96.3	47.1	-0.0292	0.7	111105
Clear-cut strip	15	17	14:30-15:30	Medium	c-15-2	4.86451	0.198228	3.0129	329	1.56	6	1	2.84	32.67	31.74	32.64	383.84	377.24	29.174	32.671	56.65	63.44	499.9	0	342	96.3	47.1	-0.0292	0.7	111105
Clear-cut strip	15	17	14:30-15:30	Medium	c-15-2	3.36545	0.182555	2.90577	331	1.56	6	1	2.84	32.68	31.74	32.64	383.86	377.55	29.173	32.615	56.6	63.28	499.9	0	342	96.3	47.1	-0.0292	0.7	111105
Clear-cut strip	15	17	14:30-15:30	Medium	c-15-2	0.939957	0.0620529	1.00411	353	1.54	6	1	2.84	31.86	31.77	31.91	399.51	397.7	31.739	32.762	64.82	66.91	499.9	0	177	96.77	287	21.4	0.3	111105
Clear-cut strip	15	17	14:30-15:30	Medium	c-15-2	0.474123	0.0593089	1.00433	353	1.54	6	1	2.84	31.86	31.77	31.91	399.51	397.7	31.739	32.762	64.82	66.91	499.9	0	177	96.77	287	21.4	0.3	111105
Clear-cut strip	15	17	14:30-15:30	Medium	c-15-2	1.8669	0.0588179	0.691439	350	1.54	6	1	2.84	31.86	31.76	31.91	399.43	397.52	31.741	32.762	64.82	66.91	499.9	0	180	96.77	287	21.4	0.3	111105
Clear-cut strip	15	17	14:30-15:30	Medium	c-15-2	1.34314	0.0516922	1.02982	350	1.53	6	1	2.84	31.87	31.74	31.91	399.31	397.34	31.735	32.776	64.8	66.93	499.9	0	182	96.77	287	21.4	0.3	111105
Clear-cut strip	15	17	14:30-15:30	Medium	c-15-2	1.82669	0.0493422	0.994074	346	1.53	6	1	2.84	31.87	31.71	31.91	399.03	396.9	31.73	32.784	64.78	66.94	499.9	0	188	96.77	287	21.4	0.3	111105
Clear-cut strip	15	15	14:30-15:30	Small	c-15-3	2.28939	0.0517125	0.9833	301	1.42	6	1	2.84	31.92	31.23	31.91	391.43	387.99	31.671	32.595	64.49	66.37	499.9	0	222	96.77	287	21.4	1	111105
Clear-cut strip	15	15	14:30-15:30	Small	c-15-3	2.19011	0.0630991	0.631173	301	1.42	6	1	2.84	31.92	31.23	31.91	391.43	387.99	31.671	32.595	64.49	66.37	499.9	0	222	96.77	287	21.4	1	111105
Clear-cut strip	15	15	14:30-15:30	Small	c-15-3	1.90448	0.0435102	0.933995	299	1.42	6	1	2.84	31.92	31.22	31.91	391.44	387.95	31.671	32.586	64.48	66.35	499.9	0	222	96.77	287	21.4	1	111105
Clear-cut strip	15	15	14:30-15:30	Small	c-15-3	1.88618	0.0446766	0.640398	297	1.41	6	1	2.84	31.91	31.21	31.92	391.42	387.87	31.674	32.581	64.5	66.34	499.8	0	221	96.77	287	21.4	1	111105
Clear-cut strip	15	15	14:30-15:30	Small	c-15-3	2.40821	0.0583649	0.589428	295	1.41	6	1	2.84	31.93	31.21	31.92	391.4	387.74	31.677	32.588	64.46	66.31	499.8	0	221	96.77	287	21.4	1	111105
Clear-cut strip	15	15	14:30-15:30	Small	c-15-3	1.79228	0.117059	1.97126	338	1.75	6	1	2.84	32.86	32.26	32.82	388.68	384.8	29.792	32.157	57.24	61.79	499.9	0	228	96.29	47.1	-0.0292	0.7	111105
Clear-cut strip	15	15	14:30-15:30	Small	c-15-3	2.31224	0.119059	2.18631	338	1.75	6	1	2.84	32.85	32.26	32.82	388.6	384.76	29.802	32.156	57.27	61.8	499.9	0	226	96.29	47.1	-0.0292	0.7	111105
Clear-cut strip	15	15	14:30-15:30	Small	c-15-3	2.58043	0.102803	2.20117	337	1.75	6	1	2.84	32.85	32.26	32.82	388.57	384.66	29.811	32.159	57.3	61.81	499.9	0	224	96.29	47.1	-0.0292	0.7	111105
Clear-cut strip	15	15	14:30-15:30	Small	c-15-3	1.76468	0.11648	2.19584	338	1.75	6	1	2.84	32.84	32.25	32.82	388.5	384.64	29.819	32.172	57.33	61.86	499.9	0	223	96.29	47.1	-0.0292	0.7	111105
Clear-cut strip	15	15	14:30-15:30	Small	c-15-3	3.19934	0.105839	2.21631	337	1.74	6	1	2.84	32.86	32.24	32.82	388.47	384.54	29.833	32.193	57.31	61.84	499.9	0	223	96.29	47.1	-0.0292	1	111105
uncut strip	18	22	9:30-10:30	Large	b-5-1	0.119964	0.0687663	1.14822	382	1.51	6	1	2.84	31.93	31.4	31.96	401.02	400.01	30.656	32.022	62.41	65.19	499.9	0	47	96.85	290	21.4	1	111105
uncut strip	18	22	9:30-10:30	Large	b-5-1	0.0903003	0.0807006	1.37486	382	1.51	6	1	2.84	31.93	31.4	31.96	401.02	400.01	30.656	32.022	62.41	65.19	499.9	0	47	96.85	290	21.4	1	111105
uncut strip	18	22	9:30-10:30	Large	b-5-1	1.07049	0.0793571	1.24572	381	1.51	6	1	2.84	31.93	31.39	31.96	401.02	399.99	30.651	32.014	62.4	65.18	499.9	0	47	96.85	290	21.4	1	111105
uncut strip	18	22	9:30-10:30	Large	b-5-1	0.732763	0.0694848	1.15323	380	1.51	6	1	2.84	31.93	31.38	31.96	401.04	399.95	30.649	32.013	62.41	65.19	499.9	0	47	96.85	290	21.4	1	111105
uncut strip	18	22	9:30-10:30	Large	b-5-1	0.938591	0.0639447	1.00854	381	1.51	6	1	2.84	31.93	31.38	31.96	401.04	399.99	30.643	32.003	62.39	65.16	499.8	0	47	96.85	290	21.4	1	111105
uncut strip	18	18	9:30-10:30	Medium	b-5-2	1.11241	0.0748609	1.21186	377	1.46	6	1	2.84	31.72	31.16	31.74	405.07	403.66	30.632	31.892	63.13	65.73	499.9	0	53	96.85	290	21.4	1	111105
uncut strip	18	18	9:30-10:30	Medium	b-5-2	1.10368	0.0720695	1.27448	377	1.46	6	1	2.84	31.72	31.16	31.74	405.07	403.66	30.632	31.892	63.13	65.73	499.9	0	53	96.85	290	21.4	1	111105
uncut strip	18	18	9:30-10:30	Medium	b-5-2	1.32197	0.0714368	1.03953	380	1.46	6	1	2.84	31.72	31.15	31.74	405.07	403.84	30.632	31.894	63.12	65.72	499.9	0	53	96.85	290	21.4	1	111105
uncut strip	18	18	9:30-10:30	Medium	b-5-2	1.29049	0.0743728	1.15973	382	1.46	6	1	2.84	31.72	31.15	31.74	405.09	403.94	30.63	31.885	63.11	65.69	499.9	0	53	96.85	290	21.4	1	111105
uncut strip	18	18	9:30-10:30	Medium	b-5-2	0.505217	0.0778735	1.10542	384	1.46	6	1	2.84	31.72	31.14	31.73	405.08	404.02	30.624	31.886	63.09	65.69	500	0	52	96.85	290	21.4	0.7	111105
uncut strip	18	14	9:30-10:30	Small	b-5-3	0.214648	0.0447849	0.791477	430	1.39	6	1	2.84	31.23	30.57	31.32	403.28	404.13	30.393	31.13	64.39	65.95	499.9	0	58	96.84	291	21	0.7	111105
uncut strip	18	14	9:30-10:30	Small	b-5-3	0.152231	0.036496	0.77804	430	1.39	6	1	2.84	31.23	30.57	31.32	403.28	404.13	30.393	31.13	64.39	65.95	499.9	0	58	96.84	291	21	0.7	111105
uncut strip	18	14	9:30-10:30	Small	b-5-3	0.182309	0.0387206	0.782005	434	1.39	6	1	2.84	31.23	30.57	31.32	403.28	404.23	30.395	31.132	64.41	65.97	499.9	0	58	96.84	291	21	0.7	111105
uncut strip	18	14	9:30-10:30	Small	b-5-3	0.159484	0.039242	0.612557	438	1.39	6	1	2.84	31.23	30.57	31.32	403.3	404.39	30.398	31.131	64.42	65.97	499.9	0	58	96.84	291	21	0.7	111105
uncut strip	18	14	9:30-10:30	Small	b-5-3	0.10868	0.0387469	0.71418	454	1.39	6	1	2.84	31.23	30.57	31.31	403.26	404.81	30.401	31.126	64.43	65.96	499.9	0	57	96.84	291	21	0.7	111105
uncut strip	18	22	11:00-12:00	Large	b-5-1	0.203381	0.0365701	0.778339	669	2.29	6	1	2.84	33.94	32.86	34.12	366	372.41	27.409	28.227	49.57	51.05	499.9	0	42	96.32	3.78	0.765	0.3	111105
uncut strip	18	22	11:00-12:00	Large	b-5-1	0.275545	0.0435732	0.970468	373	2.13	6	1	2.84	33.27	32.41	33.33	366.61	366.79	27.575	28.593	51.77	53.68	499.9	0	64	96.32	3.78	0.765	1	111105
uncut strip	18	22	11:00-12:00	Large	b-5-1	0.360538	0.0408845	0.737889	372	2.13	6	1	2.84	33.27	32.4	33.33	366.63	366.77	27.574	28.593	51.78	53.69	499.9	0	65	96.32	3.78	0.765	1	111105
uncut strip	18	22	11:00-12:00	Large	b-5-1	0.307268	0.0314609	0.80692	373	2.13	6	1	2.84	33.27	32.4	33.33	366.6	366.77	27.573	28.589	51.79	53.7	499.9	0	62	96.32	3.78	0.765	1	111105
uncut strip	18	22	11:00-12:00	Large	b-5-1	0.151404	0.0416893	0.718257	371	2.13	6	1	2.84	33.26	32.4	33.32	366.57	366.7	27.572	28.587	51.8	53.71	499.9	0	59	96.32	3.78	0.765	1	111105
uncut strip	18	22	11:00-12:00	Large	b-5-1	0.101607	0.0452106	0.877468	369	2.13	6	1	2.84	33.26	32.39	33.32	366.54	366.6	27.566	28.573	51.8	53.69	499.9	0	61	96.32	3.78	0.765	1	111105
uncut strip	18	22	11:00-12:00	Large	b-5-1	0.337443	0.0475797	0.964146	366	1.9	6	1	2.84	33.55	33.01	33.58	393.87	392.76	31.28	32.566	58.14	60.53	499.9	0	76	96.84	290	21.6	0.7	111105
uncut strip	18	22	11:00-12:00	Large	b-5-1	0.481873	0.0496868	1.17354	366	1.9	6	1	2.84	33.55	33.01	33.58	393.87	392.76	31.28	32.566	58.14	60.53	499.9	0	76	96.84	290	21.6	0.7	111105
uncut strip	18	22	11:00-12:00	Large	b-5-1	0.161228	0.0488425	1.07286	365	1.9	6	1	2.84	33.55	33.01	33.58	393.87	392.71	31.278	32.571	58.14	60.54	499.9	0	76	96.84	290	21.6	0.7	111105
uncut strip	18	22	11:00-12:00	Large	b-5-1	0.297324	0.0611348	1.26529	367	1.9	6	1	2.84	33.55	33.01	33.58	393.85	392.76	31.274	32.567	58.14	60.54	499.9	0	76	96.84	290	21.6	0.7	111105
uncut strip	18	22	11:00-12:00	Large	b-5-1	0.187313	0.0637026	1.25761	367	1.9	6	1	2.84	33.55	33	33.58	393.79	392.73	31.272	32.564	58.13	60.54	499.8	0	76	96.84	290	21.6	0.7	111105
uncut strip	18	18	11:00-12:00	Medium	b-5-2	-0.362435	0.0409734	1.38685	350	2.85	6	1	2.84	35.57	35	35.6	366.27	365.76	27.604	29.085	45.62	48.06	499.9	0	87	96.32	4.73	0.512	1	111105
uncut strip	18	18	11:00-12:00	Medium	b-5-2	0.417215	0.0405242	1.0952	343	2.84	6	1	2.84	35.56	34.99	35.59	366.34	365.63	27.607	29.091	45.64	48.09	499.9	0	87	96.32	4.73	0.512	1	111105
uncut strip	18	18	11:00-12:00	Medium	b-5-2	-0.264448	0.0364605	1.07693	338	2.84	6	1	2.84	35.56	34.98	35.58	366.33	365.47	27.602	29.07	45.65	48.07	499.9	0	87	96.32	4.73	0.512	1	111105
uncut strip	18	18	11:00-12:00	Medium	b-5-2	0.208602	0.0315698	1.1558	342	2.84	6	1	2.84	35.55	34.98	35.58	366.29	365.55	27.609	29.065	45.68	48.08	499.9	0	86	96.32	4.73	0.512	0.7	111105
uncut strip	18	18	11:00-12:00	Medium	b-5-2	0.675465	0.0458159	1.14539	342	2.84	6	1	2.84	35.54	34.97	35.57	366.36	365.6	27.607	29.086	45.68	48.13	499.9	0	86	96.32	4.73	0.512	1	111105
uncut strip	18	18	11:00-12:00	Medium	b-5-2	1.35617	0.0399508	0.756904	344	1.75	6	1	2.84	33.09	32.29	33.15	390.81	389.27	31.138	32.105	59.37	61.22	499.9	0	105	96.84	288	21.4	0.7	111105
uncut strip	18	18	11:00-12:00	Medium	b-5-2	0.26232	0.0492311	0.679852	344	1.75	6	1	2.84	33.09	32.29	33.15	390.81	389.27	31.138	32.105	59.37	61.22	499.9	0	105	96.84	288	21.4	0.7	111105
uncut strip	18	18	11:00-12:00	Medium	b-5-2	0.368798	0.0464357	0.766151	344	1.75	6	1	2.84	33.1	32.29	33.15	390.8	389.27	31.134	32.103	59.35	61.2	499.8	0	104	96.84	288	21.4	0.7	111105
uncut strip	18	18	11:00-12:00	Medium	b-5-2	1.32219	0.0413743	0.774769	345	1.75	6	1	2.84	33.1	32.29	33.15	390.79	389.3	31.135	32.095	59.33	61.16	499.8	0	105	96.84	288	21.4	0.7	111105
uncut strip	18	18	11:00-12:00	Medium	b-5-2	0.0754362	0.0396665	0.808126	348	1.74	6	1	2.84	33.11	32.28	33.15	390.78	389.38	31.131	32.086	59.29	61.11	499.9	0	105	96.84	288	21.4	0.7	111105
uncut strip	18	14	11:00-12:00	Small	b-5-3	-0.422397	0.0586456	1.01819	374	1.63	6	1	2.84	32.78	31.92	32.9	391.37	390.67	31.094	32.243	60.35	62.58	499.9	0	83	96.84	288	21.4	0.3	111105
uncut strip	18	14	11:00-12:00	Small	b-5-3	0.904267	0.0634368	1.00819	374	1.63	6	1	2.84	32.78	31.92	32.9	391.37	390.67	31.094	32.243	60.35	62.58	499.9	0	83	96.84	288	21.4	0.3	111105
uncut strip	18	14	11:00-12:00	Small	b-5-3	0.0570436	0.0482802	1.15223	374	1.63	6	1	2.84	32.78	31.92	32.9	391.36	390.66	31.096	32.249	60.35	62.59	499.9	0	83	96.84	288	21.4	0.3	111105
uncut strip	18	14	11:00-12:00	Small	b-5-3	-0.281988	0.0617389	0.868755	374	1.63	6	1	2.84	32.78	31.92	32.9	391.34	390.61	31.096	32.257	60.35	62.6	499.9	0	83	96.84	288	21.4	0.3	111105
uncut strip	18	14	11:00-12:00	Small	b-5-3	0.866412	0.0638805	0.877219	374	1.63	6	1	2.84	32.78	31.93	32.9	391.3	390.59	31.101	32.267	60.34	62.61	499.9	0	83	96.84	288	21.4	0.3	111105
uncut strip	18	14	11:00-12:00	Small	b-5-3	0.35535	0.0632137	1.19879	376	1.63	6	1	2.84	32.79	31.94	32.89	391.2	390.55	31.103	32.275	60.34	62.61	499.9	0	82	96.84	288	21.4	0.3	111105
uncut strip	18	14	11:00-12:00	Small	b-5-3	0.979763	0.0290847	1.02278	325	3.05	6	1	2.84	36.57	35.73	36.64	367.27	366.23	28.166	29.422	44.05	46.01	499.9	0	63	96.33	4.73	0.512	0.7	111105
uncut strip	18	14	11:00-12:00	Small	b-5-3	-0.182118	0.0324588	1.05486	322	3.04	6	1	2.84	36.57	35.72	36.63	367.24	366.13	28.161	29.416	44.05	46.02	499.9	0	61	96.33	4.73	0.512	0.7	111105
uncut strip	18	14	11:00-12:00	Small	b-5-3	0.739555	0.027067	0.924656	324	3.04	6	1	2.84	36.56	35.69	36.62	367.16	366.1	28.155	29.408	44.07	46.03	499.9	0	58	96.33	4.73	0.512	0.7	111105
uncut strip	18	14	11:00-12:00	Small	b-5-3	-0.122509	0.0270181	1.11166	324	3.03	6	1	2.84	36.55	35.67	36.62	367.11	366.06	28.153	29.396	44.08	46.02	499.9	0	56	96.33	4.73	0.512	0.7	111105
uncut strip	18	14	11:00-12:00	Small	b-5-3	-0.287927	0.0406758	0.931658	327	3.03	6	1	2.84	36.54	35.66	36.61	366.97	365.99	28.151	29.394	44.1	46.05	499.9	0	54	96.33	4.73	0.512	0.7	111105
uncut strip	18	22	13:00-14:00	Large	b-5-1	-0.445157	0.0419057	1.03735	367	2.5	6	1	2.84	34.37	33.72	34.38	364.5	364.56	27.557	28.719	48.64	50.69	499.9	0	42	96.27	2.71	0.729	0.7	111105
uncut strip	18	22	13:00-14:00	Large	b-5-1	-0.280487	0.0390743	1.06061	366	2.5	6	1	2.84	34.37	33.73	34.38	364.51	364.54	27.554	28.715	48.63	50.68	499.9	0	42	96.27	2.71	0.729	0.7	111105
uncut strip	18	22	13:00-14:00	Large	b-5-1	-0.0844746	0.038632	0.896955	366	2.5	6	1	2.84	34.37	33.74	34.38	364.52	364.55	27.554	28.708	48.63	50.67	499.9	0	42	96.28	2.71	0.729	0.7	111105
uncut strip	18	22	13:00-14:00	Large	b-5-1	-1.00299	0.0344103	1.0117	365	2.5	6	1	2.84	34.37	33.72	34.38	364.53	364.53	27.552	28.703	48.64	50.67	499.9	0	42	96.27	2.71	0.729	0.7	111105
uncut strip	18	22	13:00-14:00	Large	b-5-1	0.0269842	0.0413721	1.06369	363	2.49	6	1	2.84	34.36	33.71	34.38	364.52	364.49	27.551	28.693	48.65	50.66	499.9	0	42	96.27	2.71	0.729	0.7	111105
uncut strip	18	22	13:00-14:00	Large	b-5-1	-0.201163	0.046186	0.755625	366	1.6	6	1	2.84	32.37	31.91	32.41	385.38	384.75	31.682	32.573	62.86	64.63	499.8	0	50	96.73	287	21.5	1	111105
uncut strip	18	22	13:00-14:00	Large	b-5-1	0.759037	0.0478782	0.681522	366	1.6	6	1	2.84	32.37	31.91	32.41	385.38	384.75	31.682	32.573	62.86	64.63	499.8	0	50	96.73	287	21.5	1	111105
uncut strip	18	22	13:00-14:00	Large	b-5-1	0.674168	0.0482328	0.958759	365	1.6	6	1	2.84	32.37	31.92	32.41	385.44	384.77	31.684	32.571	62.87	64.63	499.8	0	50	96.73	287	21.5	1	111105
uncut strip	18	22	13:00-14:00	Large	b-5-1	0.186534	0.0379551	0.822695	365	1.6	6	1	2.84	32.37	31.92	32.41	385.52	384.84	31.683	32.576	62.86	64.64	499.9	0	50	96.73	287	21.5	1	111105
uncut strip	18	22	13:00-14:00	Large	b-5-1	0.565873	0.0413515	0.704974	363	1.6	6	1	2.84	32.37	31.92	32.41	385.7	384.95	31.685	32.579	62.87	64.64	500	0	50	96.73	287	21.5	1	111105
uncut strip	18	18	13:00-14:00	Medium	b-5-2	0.702941	0.0350602	0.665576	368	2.05	6	1	2.84	33.07	32.41	33.14	384.47	384.02	28.507	29.456	54.12	55.92	499.9	0	53	96.27	47.1	-0.0292	0.3	111105
uncut strip	18	18	13:00-14:00	Medium	b-5-2	0.702899	0.042511	0.904344	367	2.05	6	1	2.84	33.06	32.4	33.14	384.4	383.92	28.516	29.465	54.15	55.95	499.9	0	52	96.27	47.1	-0.0292	0.3	111105
uncut strip	18	18	13:00-14:00	Medium	b-5-2	0.659071	0.0404597	0.895787	362	2.05	6	1	2.84	33.06	32.4	33.13	384.39	383.78	28.528	29.468	54.17	55.96	499.9	0	52	96.27	47.1	-0.0292	0.3	111105
uncut strip	18	18	13:00-14:00	Medium	b-5-2	-0.340109	0.0340039	0.844039	358	2.05	6	1	2.84	33.06	32.4	33.13	384.34	383.65	28.535	29.468	54.19	55.97	499.9	0	51	96.27	47.1	-0.0292	0.7	111105
uncut strip	18	18	13:00-14:00	Medium	b-5-2	0.605575	0.0293808	0.918176	362	2.04	6	1	2.84	33.06	32.39	33.13	384.27	383.67	28.545	29.474	54.22	55.98	499.9	0	51	96.27	47.1	-0.0292	0.7	111105
uncut strip	18	18	13:00-14:00	Medium	b-5-2	1.55214	0.0470782	0.681036	344	1.58	6	1	2.84	32.32	31.84	32.37	387.97	386.57	31.719	32.571	63.1	64.8	499.8	0	61	96.73	287	21.5	0.7	111105
uncut strip	18	18	13:00-14:00	Medium	b-5-2	1.34985	0.0376939	0.835325	344	1.58	6	1	2.84	32.32	31.84	32.37	387.97	386.57	31.719	32.571	63.1	64.8	499.8	0	61	96.73	287	21.5	0.7	111105
uncut strip	18	18	13:00-14:00	Medium	b-5-2	1.62325	0.0522708	0.633181	346	1.58	6	1	2.84	32.32	31.84	32.37	387.94	386.6	31.719	32.568	63.1	64.79	499.9	0	61	96.73	287	21.5	1	111105
uncut strip	18	18	13:00-14:00	Medium	b-5-2	0.739482	0.0492787	0.553583	347	1.58	6	1	2.84	32.32	31.83	32.37	387.94	386.63	31.722	32.567	63.1	64.79	500	0	61	96.73	287	21.5	1	111105
uncut strip	18	18	13:00-14:00	Medium	b-5-2	0.800399	0.0523095	0.646183	345	1.58	6	1	2.84	32.32	31.82	32.37	387.9	386.56	31.723	32.566	63.1	64.78	500.1	0	61	96.73	287	21.5	1	111105
uncut strip	18	14	13:00-14:00	Small	b-5-3	-0.658578	0.0603736	0.926577	372	1.51	6	1	2.84	32.37	31.59	32.35	386.49	385.96	31.683	32.636	62.87	64.76	499.8	0	53	96.73	287	21.5	0.7	111105
uncut strip	18	14	13:00-14:00	Small	b-5-3	-0.573637	0.0512302	0.686176	372	1.51	6	1	2.84	32.37	31.59	32.35	386.49	385.96	31.683	32.636	62.87	64.76	499.8	0	53	96.73	287	21.5	0.7	111105
uncut strip	18	14	13:00-14:00	Small	b-5-3	0.00635286	0.0494303	0.829419	373	1.51	6	1	2.84	32.36	31.58	32.35	386.44	385.96	31.682	32.638	62.88	64.78	499.8	0	53	96.73	287	21.5	0.7	111105
uncut strip	18	14	13:00-14:00	Small	b-5-3	0.275525	0.0595366	0.879205	373	1.51	6	1	2.84	32.36	31.58	32.35	386.46	385.95	31.685	32.639	62.89	64.78	499.9	0	53	96.73	287	21.5	0.7	111105
uncut strip	18	14	13:00-14:00	Small	b-5-3	-0.298813	0.0554794	0.69848	371	1.5	6	1	2.84	32.36	31.57	32.35	386.45	385.87	31.683	32.626	62.9	64.77	499.9	0	54	96.73	287	21.5	0.7	111105
uncut strip	18	14	13:00-14:00	Small	b-5-3	0.573376	0.0910488	1.71719	368	1.83	6	1	2.84	32.97	32.1	33.03	383.09	382.21	28.956	30.815	55.27	58.81	499.9	0	70	96.27	47.1	-0.0292	0.7	111105
uncut strip	18	14	13:00-14:00	Small	b-5-3	0.152551	0.0870975	1.4135	365	1.83	6	1	2.84	32.97	32.09	33.03	383.1	382.03	28.956	30.806	55.27	58.8	499.9	0	70	96.27	47.1	-0.0292	0.7	111105
uncut strip	18	14	13:00-14:00	Small	b-5-3	0.155161	0.0886483	1.61035	364	1.83	6	1	2.84	32.97	32.09	33.03	383.11	381.99	28.954	30.8	55.26	58.79	499.9	0	70	96.27	47.1	-0.0292	0.7	111105
uncut strip	18	14	13:00-14:00	Small	b-5-3	0.929203	0.0772457	1.43285	363	1.83	6	1	2.84	32.97	32.08	33.03	383.11	381.94	28.953	30.789	55.27	58.77	499.9	0	70	96.27	47.1	-0.0292	0.7	111105
uncut strip	18	14	13:00-14:00	Small	b-5-3	0.936422	0.0798166	1.75054	362	1.83	6	1	2.84	32.97	32.07	33.03	383.09	381.87	28.951	30.792	55.27	58.78	499.9	0	71	96.27	47.1	-0.0292	0.7	111105
uncut strip	18	22	14:30-15:30	Large	b-5-1	1.38104	0.0954014	2.09524	365	1.93	6	1	2.84	34.21	32.79	34.18	394.61	392.6	29.485	31.796	52.51	56.62	499.9	0	25	96.26	47.1	-0.0292	0.3	111105
uncut strip	18	22	14:30-15:30	Large	b-5-1	1.0099	0.10701	1.97735	366	1.93	6	1	2.84	34.21	32.79	34.18	394.53	392.58	29.481	31.793	52.5	56.62	499.9	0	25	96.26	47.1	-0.0292	0.3	111105
uncut strip	18	22	14:30-15:30	Large	b-5-1	0.605879	0.100819	1.90572	366	1.93	6	1	2.84	34.21	32.78	34.18	394.41	392.48	29.475	31.782	52.47	56.58	499.9	0	25	96.26	47.1	-0.0292	0.3	111105
uncut strip	18	22	14:30-15:30	Large	b-5-1	0.505637	0.107842	1.91431	366	1.93	6	1	2.84	34.21	32.77	34.17	394.29	392.39	29.469	31.774	52.49	56.59	499.9	0	25	96.26	47.1	-0.0292	0.3	111105
uncut strip	18	22	14:30-15:30	Large	b-5-1	0.308844	0.090126	1.98839	367	1.93	6	1	2.84	34.2	32.77	34.17	394.12	392.25	29.461	31.762	52.5	56.6	499.9	0	26	96.26	47.1	-0.0292	0.3	111105
uncut strip	18	22	14:30-15:30	Large	b-5-1	1.47369	0.0175857	0.284818	255	1.24	6	1	2.84	30.77	30.17	30.74	397.08	395.24	31.424	31.691	68.27	68.85	499.9	0	27	96.75	286	21	0.7	111105
uncut strip	18	22	14:30-15:30	Large	b-5-1	1.59139	0.0224794	0.289181	255	1.24	6	1	2.84	30.77	30.17	30.74	397.08	395.24	31.424	31.691	68.27	68.85	499.9	0	27	96.75	286	21	0.7	111105
uncut strip	18	22	14:30-15:30	Large	b-5-1	1.45563	0.0257914	0.290796	255	1.24	6	1	2.84	30.79	30.17	30.74	397	395.18	31.427	31.69	68.22	68.79	499.9	0	27	96.75	286	21	0.7	111105
uncut strip	18	22	14:30-15:30	Large	b-5-1	1.41764	0.0109291	0.354401	255	1.24	6	1	2.84	30.79	30.17	30.74	396.87	395.07	31.426	31.688	68.21	68.78	499.9	0	27	96.75	286	21	0.7	111105
uncut strip	18	22	14:30-15:30	Large	b-5-1	1.22111	0.0166159	0.239394	240	1.24	6	1	2.84	30.79	30.17	30.74	396.75	394.8	31.429	31.685	68.21	68.76	499.9	0	26	96.75	286	21	0.7	111105
uncut strip	18	18	14:30-15:30	Medium	b-5-2	1.37806	0.0485776	1.13627	316	2.12	6	1	2.84	33.5	32.9	33.62	385.71	383.48	29.005	30.155	53.73	55.86	499.9	0	64	96.25	47.1	-0.0292	0.7	111105
uncut strip	18	18	14:30-15:30	Medium	b-5-2	2.29151	0.0518582	0.807917	314	2.12	6	1	2.84	33.5	32.9	33.62	385.71	383.45	29.012	30.152	53.74	55.85	499.9	0	64	96.25	47.1	-0.0292	0.7	111105
uncut strip	18	18	14:30-15:30	Medium	b-5-2	1.42577	0.0494035	0.829829	312	2.12	6	1	2.84	33.5	32.9	33.63	385.68	383.39	29.016	30.145	53.74	55.83	499.9	0	65	96.25	47.1	-0.0292	0.7	111105
uncut strip	18	18	14:30-15:30	Medium	b-5-2	2.30451	0.0505791	1.07445	310	2.12	6	1	2.84	33.51	32.91	33.63	385.64	383.3	29.016	30.141	53.74	55.82	499.9	0	65	96.25	47.1	-0.0292	0.7	111105
uncut strip	18	18	14:30-15:30	Medium	b-5-2	2.34189	0.0469075	0.822544	312	2.13	6	1	2.84	33.51	32.91	33.63	385.6	383.3	29.017	30.142	53.74	55.82	499.9	0	65	96.25	47.1	-0.0292	0.7	111105
uncut strip	18	18	14:30-15:30	Medium	b-5-2	2.69997	0.0177445	0.119205	-91.7	1.27	6	1	2.84	30.72	30.33	30.76	396.52	393.22	31.571	31.714	68.79	69.1	499.8	0	51	96.75	286	21	0.7	111105
uncut strip	18	18	14:30-15:30	Medium	b-5-2	1.95163	0.0172125	-0.0495689	-91.7	1.27	6	1	2.84	30.72	30.33	30.76	396.52	393.22	31.571	31.714	68.79	69.1	499.8	0	51	96.75	286	21	0.7	111105
uncut strip	18	18	14:30-15:30	Medium	b-5-2	2.46671	0.0147134	0.190501	-102	1.27	6	1	2.84	30.72	30.33	30.76	396.57	393.18	31.569	31.712	68.78	69.1	499.8	0	51	96.75	286	21	0.7	111105
uncut strip	18	18	14:30-15:30	Medium	b-5-2	2.57818	0.0161779	0.23823	-118	1.27	6	1	2.84	30.72	30.33	30.76	396.6	393.16	31.57	31.712	68.78	69.09	499.9	0	51	96.75	286	21	0.7	111105
uncut strip	18	18	14:30-15:30	Medium	b-5-2	2.15558	0.0165072	0.321618	-123	1.27	6	1	2.84	30.73	30.33	30.76	396.65	393.11	31.567	31.71	68.76	69.08	499.9	0	51	96.75	286	21	0.7	111105
uncut strip	18	14	14:30-15:30	Small	b-5-3	1.1486	0.018728	0.437421	317	1.33	6	1	2.84	30.75	30.63	30.77	391.73	390.38	31.544	31.95	68.64	69.52	499.9	0	41	96.75	286	21	1	111105
uncut strip	18	14	14:30-15:30	Small	b-5-3	1.69965	0.0291287	0.162311	317	1.33	6	1	2.84	30.75	30.63	30.77	391.73	390.38	31.544	31.95	68.64	69.52	499.9	0	41	96.75	286	21	1	111105
uncut strip	18	14	14:30-15:30	Small	b-5-3	1.30332	0.0215359	0.344646	319	1.32	6	1	2.84	30.75	30.61	30.78	391.7	390.36	31.544	31.949	68.63	69.51	499.9	0	40	96.75	286	21	1	111105
uncut strip	18	14	14:30-15:30	Small	b-5-3	1.21757	0.0174978	0.321997	321	1.32	6	1	2.84	30.75	30.59	30.78	391.63	390.33	31.542	31.949	68.63	69.51	499.9	0	40	96.75	286	21	0.7	111105
uncut strip	18	14	14:30-15:30	Small	b-5-3	0.951718	0.0180118	0.441359	324	1.31	6	1	2.84	30.75	30.56	30.78	391.58	390.32	31.539	31.948	68.63	69.52	499.9	0	40	96.75	286	21	0.7	111105
uncut strip	18	14	14:30-15:30	Small	b-5-3	2.22014	0.0815419	1.38253	329	1.98	6	1	2.84	33.46	32.53	33.5	386.49	383.54	28.787	30.564	53.44	56.74	499.9	0	43	96.25	47.1	-0.0292	0.7	111105
uncut strip	18	14	14:30-15:30	Small	b-5-3	1.14341	0.0638574	1.49962	330	1.98	6	1	2.84	33.46	32.53	33.5	386.47	383.52	28.786	30.569	53.44	56.75	499.9	0	43	96.25	47.1	-0.0292	0.7	111105
uncut strip	18	14	14:30-15:30	Small	b-5-3	2.23228	0.0724057	1.52821	330	1.98	6	1	2.84	33.46	32.53	33.5	386.47	383.55	28.787	30.566	53.43	56.74	499.9	0	43	96.25	47.1	-0.0292	0.7	111105
uncut strip	18	14	14:30-15:30	Small	b-5-3	2.58862	0.0755892	1.64588	327	1.98	6	1	2.84	33.46	32.53	33.5	386.44	383.36	28.787	30.554	53.44	56.72	499.9	0	43	96.25	47.1	-0.0292	0.7	111105
uncut strip	18	14	14:30-15:30	Small	b-5-3	1.98809	0.0774494	1.61167	328	1.98	6	1	2.84	33.46	32.52	33.5	386.4	383.42	28.784	30.547	53.44	56.72	499.9	0	43	96.25	47.1	-0.0292	0.7	111105
uncut strip	10	18	9:30-10:30	Large	b-3-1	0.236282	0.0889978	1.1481	393	1.38	6	1	2.84	31.21	30.76	31.29	406.33	405.52	30.26	31.699	64.19	67.24	499.9	0	91	96.85	291	21.2	0.7	111105
uncut strip	10	18	9:30-10:30	Large	b-3-1	0.384476	0.0797031	1.3789	393	1.38	6	1	2.84	31.21	30.76	31.29	406.33	405.52	30.26	31.699	64.19	67.24	499.9	0	91	96.85	291	21.2	0.7	111105
uncut strip	10	18	9:30-10:30	Large	b-3-1	0.564803	0.0875784	1.36851	394	1.38	6	1	2.84	31.21	30.76	31.29	406.26	405.52	30.259	31.697	64.19	67.24	499.9	0	91	96.85	291	21.2	0.7	111105
uncut strip	10	18	9:30-10:30	Large	b-3-1	0.21711	0.0935161	1.04004	393	1.38	6	1	2.84	31.21	30.76	31.29	406.25	405.48	30.257	31.699	64.18	67.24	499.9	0	91	96.85	291	21.2	0.7	111105
uncut strip	10	18	9:30-10:30	Large	b-3-1	0.332273	0.0801776	1.33455	395	1.38	6	1	2.84	31.21	30.76	31.29	406.12	405.44	30.26	31.701	64.18	67.24	499.9	0	91	96.85	291	21.2	0.7	111105
uncut strip	10	16	9:30-10:30	Medium	b-3-2	2.02289	0.0498669	0.741537	355	1.39	6	1	2.84	31.53	30.78	31.55	412.5	410.23	30.711	31.651	63.97	65.92	499.9	0	54	96.85	291	21.2	0.7	111105
uncut strip	10	16	9:30-10:30	Medium	b-3-2	1.54626	0.0528179	0.776791	358	1.39	6	1	2.84	31.53	30.78	31.55	412.4	410.23	30.705	31.654	63.95	65.93	499.9	0	54	96.85	291	21.2	0.7	111105
uncut strip	10	16	9:30-10:30	Medium	b-3-2	2.0039	0.04933	0.923101	357	1.39	6	1	2.84	31.52	30.78	31.55	412.25	410.08	30.705	31.644	63.99	65.94	499.9	0	54	96.85	291	21.2	0.7	111105
uncut strip	10	16	9:30-10:30	Medium	b-3-2	1.99032	0.0471019	0.967722	358	1.39	6	1	2.84	31.52	30.78	31.55	412.17	410	30.705	31.65	63.99	65.96	499.9	0	54	96.85	291	21.2	0.7	111105
uncut strip	10	16	9:30-10:30	Medium	b-3-2	2.02016	0.0549137	0.937928	359	1.39	6	1	2.84	31.53	30.77	31.55	412.07	409.96	30.7	31.65	63.96	65.94	499.9	0	54	96.85	291	21.2	0.7	111105
uncut strip	10	14	9:30-10:30	Small	b-3-3	2.38457	0.0549324	0.986741	350	1.46	6	1	2.84	31.78	31.15	31.79	418.03	414.89	30.742	31.899	63.15	65.53	499.9	0	60	96.86	291	21.2	0.7	111105
uncut strip	10	14	9:30-10:30	Small	b-3-3	2.15193	0.0604992	1.10011	353	1.46	6	1	2.84	31.78	31.14	31.79	417.87	414.86	30.74	31.896	63.14	65.51	499.9	0	60	96.86	291	21.2	0.7	111105
uncut strip	10	14	9:30-10:30	Small	b-3-3	1.65661	0.0644972	0.809664	353	1.46	6	1	2.84	31.78	31.14	31.79	417.87	414.86	30.74	31.896	63.14	65.51	499.9	0	60	96.86	291	21.2	0.7	111105
uncut strip	10	14	9:30-10:30	Small	b-3-3	2.34424	0.0611946	1.03084	353	1.46	6	1	2.84	31.79	31.14	31.79	417.54	414.57	30.739	31.889	63.1	65.47	499.9	0	60	96.86	291	21.2	0.7	111105
uncut strip	10	14	9:30-10:30	Small	b-3-3	2.39175	0.0710061	1.04579	358	1.46	6	1	2.84	31.77	31.14	31.78	417.08	414.39	30.734	31.884	63.16	65.52	499.9	0	59	96.86	291	21.2	0.7	111105
uncut strip	10	18	11:00-12:00	Large	b-3-1	0.785396	0.037253	1.18812	343	2.9	6	1	2.84	36.09	35.01	36.24	370.12	369.33	27.104	28.52	43.55	45.83	499.9	0	77	96.36	4.73	0.512	0.7	111105
uncut strip	10	18	11:00-12:00	Large	b-3-1	0.387641	0.0355167	1.30435	344	2.9	6	1	2.84	36.08	35.01	36.24	370.11	369.35	27.107	28.52	43.56	45.83	499.9	0	77	96.36	4.73	0.512	0.7	111105
uncut strip	10	18	11:00-12:00	Large	b-3-1	0.5837	0.0447133	1.2408	343	2.9	6	1	2.84	36.08	35	36.23	370.13	369.34	27.11	28.514	43.57	45.83	499.9	0	77	96.36	4.73	0.512	0.7	111105
uncut strip	10	18	11:00-12:00	Large	b-3-1	0.742681	0.0398067	1.36245	344	2.9	6	1	2.84	36.08	34.99	36.23	370.12	369.36	27.109	28.513	43.57	45.83	499.9	0	77	96.36	4.73	0.512	0.7	111105
uncut strip	10	18	11:00-12:00	Large	b-3-1	-0.224718	0.032449	1.24118	344	2.9	6	1	2.84	36.08	34.99	36.23	370.1	369.33	27.11	28.526	43.58	45.85	499.9	0	77	96.36	4.73	0.512	0.7	111105
uncut strip	10	18	11:00-12:00	Large	b-3-1	0.633553	0.0577088	1.24041	356	2.17	6	1	2.84	34.74	34.16	34.73	395.75	393.98	31.567	33.215	54.93	57.79	499.9	0	95	96.85	291	21.8	0.3	111105
uncut strip	10	18	11:00-12:00	Large	b-3-1	0.369489	0.0541725	1.34565	356	2.17	6	1	2.84	34.74	34.16	34.73	395.75	393.98	31.567	33.215	54.93	57.79	499.9	0	95	96.85	291	21.8	0.3	111105
uncut strip	10	18	11:00-12:00	Large	b-3-1	1.05984	0.0532674	1.3758	357	2.17	6	1	2.84	34.74	34.16	34.73	395.71	393.99	31.563	33.211	54.9	57.77	499.8	0	96	96.85	291	21.8	0.7	111105
uncut strip	10	18	11:00-12:00	Large	b-3-1	0.186279	0.0618114	1.41541	356	2.17	6	1	2.84	34.74	34.15	34.73	395.72	393.96	31.561	33.211	54.91	57.78	499.8	0	96	96.85	291	21.8	0.7	111105
uncut strip	10	18	11:00-12:00	Large	b-3-1	0.828173	0.0610394	1.5788	356	2.17	6	1	2.84	34.74	34.13	34.73	395.72	393.95	31.552	33.206	54.9	57.77	499.8	0	95	96.85	291	21.8	0.7	111105
uncut strip	10	16	11:00-12:00	Medium	b-3-2	1.69091	0.0499171	1.54247	277	3.25	6	1	2.84	37.84	36.3	38.01	384.24	380.62	27.426	29.293	40.04	42.77	499.9	0	53	96.36	2.44	0.458	0.7	111105
uncut strip	10	16	11:00-12:00	Medium	b-3-2	1.9568	0.0428599	1.65418	279	3.24	6	1	2.84	37.84	36.3	38.01	384.31	380.71	27.428	29.302	40.04	42.78	499.9	0	52	96.36	2.44	0.458	0.7	111105
uncut strip	10	16	11:00-12:00	Medium	b-3-2	2.90507	0.0458929	1.4296	275	3.24	6	1	2.84	37.84	36.3	38.01	384.4	380.66	27.428	29.314	40.05	42.81	499.9	0	52	96.36	2.44	0.458	0.7	111105
uncut strip	10	16	11:00-12:00	Medium	b-3-2	1.95382	0.0510259	1.72768	276	3.25	6	1	2.84	37.84	36.31	38.01	384.47	380.75	27.427	29.318	40.05	42.81	499.9	0	51	96.36	2.44	0.458	1	111105
uncut strip	10	16	11:00-12:00	Medium	b-3-2	2.83343	0.0535612	1.58231	276	3.25	6	1	2.84	37.83	36.33	38	384.6	380.9	27.429	29.315	40.07	42.82	499.9	0	51	96.36	2.44	0.458	1	111105
uncut strip	10	16	11:00-12:00	Medium	b-3-2	1.33229	0.0764552	1.31746	364	1.99	6	1	2.84	34.19	33.56	34.28	400.41	398.65	31.697	33.343	56.85	59.81	499.9	0	96	96.85	291	21.8	0.7	111105
uncut strip	10	16	11:00-12:00	Medium	b-3-2	0.79845	0.069419	1.59322	363	1.98	6	1	2.84	34.19	33.56	34.28	400.35	398.53	31.697	33.346	56.85	59.81	499.9	0	96	96.85	291	21.8	0.7	111105
uncut strip	10	16	11:00-12:00	Medium	b-3-2	0.459494	0.060394	1.40471	363	1.99	6	1	2.84	34.19	33.57	34.28	400.28	398.48	31.698	33.34	56.85	59.8	499.9	0	95	96.85	291	21.8	0.7	111105
uncut strip	10	16	11:00-12:00	Medium	b-3-2	0.360707	0.0713675	1.4867	362	1.99	6	1	2.84	34.19	33.57	34.28	400.21	398.38	31.698	33.341	56.86	59.8	499.9	0	95	96.85	291	21.8	0.7	111105
uncut strip	10	16	11:00-12:00	Medium	b-3-2	0.324299	0.058612	1.47346	361	1.99	6	1	2.84	34.19	33.57	34.28	400.07	398.17	31.697	33.345	56.85	59.81	499.9	0	95	96.85	291	21.8	0.7	111105
uncut strip	10	14	11:00-12:00	Small	b-3-3	0.831815	0.0638261	1.43374	379	1.92	6	1	2.84	34.03	33.27	34.08	397.34	396.5	31.612	33.143	57.21	59.98	499.9	0	111	96.84	290	21.8	0.7	111105
uncut strip	10	14	11:00-12:00	Small	b-3-3	0.323941	0.0698269	1.36586	379	1.92	6	1	2.84	34.03	33.27	34.08	397.29	396.43	31.612	33.143	57.21	59.98	500	0	111	96.84	290	21.8	0.7	111105
uncut strip	10	14	11:00-12:00	Small	b-3-3	0.84513	0.0690253	1.52848	378	1.92	6	1	2.84	34.03	33.28	34.08	397.24	396.35	31.613	33.153	57.21	60	500	0	111	96.84	290	21.8	0.7	111105
uncut strip	10	14	11:00-12:00	Small	b-3-3	-0.290225	0.0755145	1.41678	377	1.92	6	1	2.84	34.03	33.29	34.08	397.22	396.28	31.612	33.159	57.21	60.01	500	0	111	96.84	290	21.8	0.7	111105
uncut strip	10	14	11:00-12:00	Small	b-3-3	0.826315	0.0617365	1.33881	376	1.93	6	1	2.84	34.03	33.3	34.08	397.23	396.25	31.61	33.161	57.2	60.01	500	0	111	96.84	290	21.8	0.7	111105
uncut strip	10	14	11:00-12:00	Small	b-3-3	1.57324	0.0417272	1.55063	263	3.57	6	1	2.84	38.56	37.36	38.81	370.19	366.63	27.629	29.631	38.79	41.61	499.9	0	103	96.37	2.44	0.458	1	111105
uncut strip	10	14	11:00-12:00	Small	b-3-3	2.61229	0.0368849	1.81464	264	3.57	6	1	2.84	38.56	37.36	38.81	370.16	366.64	27.628	29.625	38.8	41.61	499.9	0	104	96.37	2.44	0.458	1	111105
uncut strip	10	14	11:00-12:00	Small	b-3-3	2.0336	0.0418323	1.82189	263	3.58	6	1	2.84	38.56	37.37	38.81	370.2	366.69	27.622	29.614	38.79	41.59	499.9	0	103	96.37	2.44	0.458	0.7	111105
uncut strip	10	14	11:00-12:00	Small	b-3-3	2.53105	0.048049	1.81224	267	3.59	6	1	2.84	38.56	37.39	38.8	370.16	366.78	27.618	29.617	38.79	41.6	499.9	0	103	96.37	2.44	0.458	0.7	111105
uncut strip	10	14	11:00-12:00	Small	b-3-3	1.54106	0.037438	1.87697	272	3.59	6	1	2.84	38.56	37.41	38.8	370.18	366.94	27.616	29.621	38.78	41.59	499.9	0	102	96.37	2.44	0.458	0.7	111105
uncut strip	10	18	13:00-14:00	Large	b-3-1	0.911348	0.0320826	0.787461	313	2.91	6	1	2.84	35.47	35.2	35.5	364.27	363.28	28.161	29.108	46.78	48.35	499.9	0	407	96.29	2.71	0.729	0.7	111105
uncut strip	10	18	13:00-14:00	Large	b-3-1	-0.187231	0.0198471	0.977994	310	2.9	6	1	2.84	35.47	35.16	35.5	364.28	363.21	28.149	29.111	46.77	48.36	499.9	0	450	96.29	2.71	0.729	0.7	111105
uncut strip	10	18	13:00-14:00	Large	b-3-1	0.660972	0.0171729	0.679088	301	2.89	6	1	2.84	35.46	35.14	35.5	364.26	363.01	28.14	29.095	46.76	48.35	499.9	0	469	96.29	2.71	0.729	0.7	111105
uncut strip	10	18	13:00-14:00	Large	b-3-1	0.718916	0.0312666	0.949397	284	2.88	6	1	2.84	35.46	35.12	35.5	364.09	362.48	28.109	29.079	46.71	48.33	499.9	0	393	96.29	2.71	0.729	0.7	111105
uncut strip	10	18	13:00-14:00	Large	b-3-1	1.75352	0.0232441	0.842573	285	2.89	6	1	2.84	35.46	35.12	35.5	364.06	362.49	28.107	29.075	46.71	48.32	499.9	0	393	96.29	2.71	0.729	0.7	111105
uncut strip	10	18	13:00-14:00	Large	b-3-1	0.563005	0.0267823	0.992448	283	2.89	6	1	2.84	35.46	35.14	35.5	364.04	362.44	28.103	29.064	46.7	48.29	499.9	0	398	96.29	2.71	0.729	0.7	111105
uncut strip	10	18	13:00-14:00	Large	b-3-1	0.88975	0.0214257	1.01039	279	2.89	6	1	2.84	35.46	35.14	35.5	364.05	362.39	28.102	29.057	46.7	48.28	499.9	0	398	96.3	2.71	0.729	0.7	111105
uncut strip	10	18	13:00-14:00	Large	b-3-1	1.4676	0.0233265	0.78469	285	2.9	6	1	2.84	35.47	35.14	35.5	364.01	362.45	28.096	29.056	46.68	48.27	499.9	0	406	96.3	2.71	0.729	0.7	111105
uncut strip	10	18	13:00-14:00	Large	b-3-1	0.777003	0.0219184	0.571858	361	2.03	6	1	2.84	34.24	33.54	34.23	394.06	393.3	32.003	32.783	57.2	58.59	499.9	0	85	96.8	291	21.3	0.7	111105
uncut strip	10	18	13:00-14:00	Large	b-3-1	1.13038	0.0226221	0.810102	363	2.03	6	1	2.84	34.25	33.54	34.23	394.11	393.39	32.003	32.786	57.19	58.59	499.9	0	85	96.8	291	21.3	0.7	111105
uncut strip	10	18	13:00-14:00	Large	b-3-1	0.75581	0.0410757	0.515285	366	2.03	6	1	2.84	34.26	33.54	34.23	394.12	393.48	32.004	32.788	57.16	58.56	499.9	0	85	96.8	291	21.3	0.7	111105
uncut strip	10	18	13:00-14:00	Large	b-3-1	0.222011	0.0326076	0.671199	361	2.03	6	1	2.84	34.25	33.54	34.23	394.2	393.43	32.004	32.785	57.17	58.57	499.9	0	84	96.8	291	21.3	0.7	111105
uncut strip	10	18	13:00-14:00	Large	b-3-1	-0.0996738	0.0374221	0.667534	365	2.03	6	1	2.84	34.24	33.54	34.23	394.29	393.6	32.001	32.792	57.2	58.62	499.9	0	84	96.8	291	21.3	0.7	111105
uncut strip	10	16	13:00-14:00	Medium	b-3-2	1.28704	0.0403383	1.00249	299	2.72	6	1	2.84	35.25	34.62	35.28	363.42	361.93	28.152	29.208	47.32	49.1	499.9	0	110	96.29	2.71	0.729	1	111105
uncut strip	10	16	13:00-14:00	Medium	b-3-2	1.06532	0.0359164	0.911582	304	2.72	6	1	2.84	35.26	34.63	35.29	363.39	362.01	28.15	29.21	47.29	49.08	499.9	0	112	96.29	2.71	0.729	1	111105
uncut strip	10	16	13:00-14:00	Medium	b-3-2	0.184686	0.0362245	0.730843	305	2.72	6	1	2.84	35.28	34.62	35.29	363.42	362.06	28.149	29.21	47.26	49.04	499.9	0	112	96.29	2.71	0.729	1	111105
uncut strip	10	16	13:00-14:00	Medium	b-3-2	1.39867	0.036813	0.89358	305	2.72	6	1	2.84	35.28	34.62	35.29	363.44	362.08	28.148	29.203	47.25	49.02	499.9	0	112	96.29	2.71	0.729	1	111105
uncut strip	10	16	13:00-14:00	Medium	b-3-2	0.30025	0.0269658	1.10375	304	2.72	6	1	2.84	35.28	34.61	35.29	363.44	362.05	28.148	29.211	47.26	49.04	499.9	0	111	96.29	2.71	0.729	1	111105
uncut strip	10	16	13:00-14:00	Medium	b-3-2	3.13838	0.0328834	0.806378	222	1.91	6	1	2.84	34.09	33.19	34.05	398.02	394.12	32.297	33.007	58.22	59.5	499.9	0	114	96.79	291	21.3	0.7	111105
uncut strip	10	16	13:00-14:00	Medium	b-3-2	2.39527	0.0364874	0.687676	222	1.91	6	1	2.84	34.09	33.19	34.05	398.02	394.12	32.297	33.007	58.22	59.5	499.9	0	114	96.79	291	21.3	0.7	111105
uncut strip	10	16	13:00-14:00	Medium	b-3-2	2.63598	0.0382169	0.459485	230	1.91	6	1	2.84	34.09	33.2	34.05	398	394.3	32.298	33.004	58.21	59.48	499.9	0	114	96.79	291	21.3	0.7	111105
uncut strip	10	16	13:00-14:00	Medium	b-3-2	2.47059	0.0279186	0.479809	253	1.91	6	1	2.84	34.1	33.2	34.05	397.85	394.67	32.304	33.007	58.2	59.46	499.9	0	114	96.79	291	21.3	0.7	111105
uncut strip	10	16	13:00-14:00	Medium	b-3-2	1.44391	0.0345205	0.422075	281	1.91	6	1	2.84	34.1	33.2	34.06	397.49	394.97	32.309	33.001	58.19	59.43	499.9	0	114	96.79	291	21.3	0.7	111105
uncut strip	10	14	13:00-14:00	Small	b-3-3	-0.292338	0.0648176	1.27025	372	1.83	6	1	2.84	33.99	33.14	33.99	386.44	385.72	32.106	33.725	58.19	61.13	499.9	0	87	96.79	288	22.1	1	111105
uncut strip	10	14	13:00-14:00	Small	b-3-3	0.226927	0.0635226	1.52906	372	1.83	6	1	2.84	33.99	33.14	33.99	386.44	385.72	32.106	33.725	58.19	61.13	499.9	0	87	96.79	288	22.1	1	111105
uncut strip	10	14	13:00-14:00	Small	b-3-3	0.584047	0.0732608	1.24796	372	1.83	6	1	2.84	33.99	33.14	33.99	386.45	385.69	32.105	33.726	58.2	61.14	499.9	0	87	96.79	288	22.1	1	111105
uncut strip	10	14	13:00-14:00	Small	b-3-3	0.917338	0.0652439	1.40373	371	1.83	6	1	2.84	33.99	33.14	33.99	386.49	385.7	32.106	33.724	58.2	61.13	499.9	0	87	96.79	288	22.1	1	111105
uncut strip	10	14	13:00-14:00	Small	b-3-3	0.637605	0.075749	1.4823	372	1.83	6	1	2.84	33.99	33.13	33.99	386.48	385.75	32.106	33.714	58.18	61.1	499.9	0	87	96.79	288	22.1	1	111105
uncut strip	10	14	13:00-14:00	Small	b-3-3	2.54746	0.06142	1.86163	254	2.86	6	1	2.84	35.21	35.35	35.23	364.04	359.65	28.156	30.103	47.46	50.74	499.9	0	873	96.29	2.71	0.729	0.7	111105
uncut strip	10	14	13:00-14:00	Small	b-3-3	2.81513	0.0634027	1.85946	256	2.83	6	1	2.84	35.2	35.26	35.23	364.05	359.72	28.158	30.102	47.46	50.74	499.9	0	803	96.29	2.71	0.729	0.7	111105
uncut strip	10	14	13:00-14:00	Small	b-3-3	3.26663	0.0546825	1.66636	260	2.8	6	1	2.84	35.2	35.15	35.23	364.03	359.83	28.163	30.092	47.47	50.72	499.9	0	725	96.29	2.71	0.729	0.7	111105
uncut strip	10	14	13:00-14:00	Small	b-3-3	3.6346	0.0648551	1.69475	260	2.76	6	1	2.84	35.2	35.04	35.23	363.99	359.78	28.168	30.085	47.48	50.71	499.9	0	713	96.29	2.71	0.729	0.7	111105
uncut strip	10	14	13:00-14:00	Small	b-3-3	2.12315	0.054455	1.69704	265	2.74	6	1	2.84	35.2	34.95	35.23	363.98	359.96	28.171	30.077	47.49	50.7	499.9	0	722	96.29	2.71	0.729	0.7	111105
uncut strip	10	18	14:30-15:30	Large	b-3-1	0.142202	0.0556084	0.880604	383	1.86	6	1	2.84	32.72	32.01	32.72	403.39	402.68	29.229	30.341	56.58	58.73	499.9	0	46	96.27	47.1	-0.0292	0.7	111105
uncut strip	10	18	14:30-15:30	Large	b-3-1	0.305843	0.0425014	1.10968	383	1.86	6	1	2.84	32.73	32.01	32.73	403.37	402.65	29.227	30.337	56.55	58.7	499.9	0	46	96.27	47.1	-0.0292	0.7	111105
uncut strip	10	18	14:30-15:30	Large	b-3-1	-0.335015	0.0388722	1.04697	385	1.86	6	1	2.84	32.73	32.01	32.73	403.33	402.67	29.223	30.334	56.53	58.68	499.9	0	46	96.27	47.1	-0.0292	0.7	111105
uncut strip	10	18	14:30-15:30	Large	b-3-1	-0.275258	0.0517652	0.747092	383	1.86	6	1	2.84	32.74	32.01	32.73	403.3	402.61	29.224	30.319	56.5	58.62	499.9	0	46	96.27	47.1	-0.0292	0.7	111105
uncut strip	10	18	14:30-15:30	Large	b-3-1	-0.34652	0.0535154	0.829631	377	1.86	6	1	2.84	32.75	32.03	32.74	403.32	402.42	29.222	30.32	56.47	58.59	499.9	0	46	96.27	47.1	-0.0292	0.7	111105
uncut strip	10	18	14:30-15:30	Large	b-3-1	0.194164	0.0350046	0.713528	364	1.59	6	1	2.84	31.91	31.41	32.01	393.92	393.1	30.588	31.308	62.3	63.77	499.9	0	40	96.79	290	21	0.7	111105
uncut strip	10	18	14:30-15:30	Large	b-3-1	0.263796	0.0332168	0.657965	364	1.59	6	1	2.84	31.91	31.41	32.01	393.92	393.1	30.588	31.308	62.3	63.77	499.9	0	40	96.79	290	21	0.7	111105
uncut strip	10	18	14:30-15:30	Large	b-3-1	0.772181	0.0421501	0.664658	365	1.59	6	1	2.84	31.91	31.41	32.01	393.95	393.17	30.588	31.307	62.3	63.77	499.9	0	41	96.79	290	21	0.7	111105
uncut strip	10	18	14:30-15:30	Large	b-3-1	0.311604	0.038492	0.520945	365	1.59	6	1	2.84	31.91	31.41	32.01	393.97	393.2	30.589	31.306	62.3	63.76	499.9	0	41	96.79	290	21	0.7	111105
uncut strip	10	18	14:30-15:30	Large	b-3-1	1.04033	0.0425523	0.544036	364	1.59	6	1	2.84	31.92	31.41	32.01	393.98	393.17	30.587	31.304	62.29	63.76	500	0	41	96.79	290	21	0.7	111105
uncut strip	10	16	14:30-15:30	Medium	b-3-2	4.88478	0.0826779	1.51044	296	1.81	6	1	2.84	32.88	32.64	32.92	407.59	401.77	31.016	32.654	59.49	62.63	499.9	0	502	96.26	47.1	-0.0292	0.7	111105
uncut strip	10	16	14:30-15:30	Medium	b-3-2	4.63786	0.0830344	1.35136	297	1.81	6	1	2.84	32.88	32.65	32.92	407.57	401.79	31.019	32.659	59.49	62.64	499.9	0	512	96.26	47.1	-0.0292	0.7	111105
uncut strip	10	16	14:30-15:30	Medium	b-3-2	4.06077	0.0772139	1.44289	297	1.81	6	1	2.84	32.88	32.65	32.92	407.57	401.79	31.019	32.659	59.49	62.64	499.9	0	512	96.26	47.1	-0.0292	0.7	111105
uncut strip	10	16	14:30-15:30	Medium	b-3-2	4.30172	0.0773189	1.50259	298	1.81	6	1	2.84	32.89	32.66	32.92	407.52	401.83	31.021	32.655	59.48	62.62	499.9	0	534	96.26	47.1	-0.0292	0.7	111105
uncut strip	10	16	14:30-15:30	Medium	b-3-2	3.79556	0.0643973	1.35119	300	1.81	6	1	2.84	32.89	32.67	32.92	407.46	401.87	31.019	32.663	59.47	62.63	499.9	0	538	96.27	47.1	-0.0292	0.7	111105
uncut strip	10	16	14:30-15:30	Medium	b-3-2	-0.0632996	0.0398933	0.794487	371	1.6	6	1	2.84	31.86	31.43	31.92	388.48	388.02	30.547	31.267	62.4	63.87	499.8	0	33	96.76	288	21.1	1	111105
uncut strip	10	16	14:30-15:30	Medium	b-3-2	-0.305436	0.028343	0.627023	371	1.6	6	1	2.84	31.86	31.43	31.92	388.48	388.02	30.547	31.267	62.4	63.87	499.8	0	33	96.76	288	21.1	1	111105
uncut strip	10	16	14:30-15:30	Medium	b-3-2	-0.324036	0.0295505	0.607683	372	1.6	6	1	2.84	31.86	31.43	31.92	388.51	388.06	30.545	31.27	62.39	63.87	499.8	0	33	96.76	288	21.1	0.7	111105
uncut strip	10	16	14:30-15:30	Medium	b-3-2	0.539164	0.0303158	0.720391	371	1.6	6	1	2.84	31.86	31.43	31.92	388.58	388.12	30.547	31.27	62.4	63.87	499.9	0	33	96.76	288	21.1	0.7	111105
uncut strip	10	16	14:30-15:30	Medium	b-3-2	0.716238	0.0465499	0.565446	371	1.6	6	1	2.84	31.86	31.43	31.92	388.67	388.2	30.546	31.269	62.39	63.87	499.9	0	33	96.76	288	21.1	0.7	111105
uncut strip	10	14	14:30-15:30	Small	b-3-3	0.865253	0.0501791	0.705023	374	1.53	6	1	2.84	31.82	31.26	31.88	389.48	388.86	30.498	31.515	62.42	64.5	499.9	0	42	96.75	288	21.1	0.7	111105
uncut strip	10	14	14:30-15:30	Small	b-3-3	-0.550927	0.0453296	0.999512	374	1.53	6	1	2.84	31.82	31.26	31.88	389.48	388.86	30.498	31.515	62.42	64.5	499.9	0	42	96.75	288	21.1	0.7	111105
uncut strip	10	14	14:30-15:30	Small	b-3-3	-0.32361	0.0491891	0.796496	374	1.53	6	1	2.84	31.82	31.26	31.88	389.51	388.91	30.501	31.519	62.42	64.51	499.9	0	42	96.75	288	21.1	0.7	111105
uncut strip	10	14	14:30-15:30	Small	b-3-3	-0.521085	0.0559009	0.73626	372	1.53	6	1	2.84	31.82	31.27	31.88	389.6	388.93	30.501	31.524	62.42	64.52	499.9	0	42	96.75	288	21.1	0.7	111105
uncut strip	10	14	14:30-15:30	Small	b-3-3	0.775567	0.0552284	0.806947	371	1.53	6	1	2.84	31.82	31.27	31.88	389.66	388.92	30.504	31.532	62.43	64.53	499.9	0	42	96.75	288	21.1	0.7	111105
uncut strip	10	14	14:30-15:30	Small	b-3-3	6.71422	0.130424	2.73215	305	1.91	6	1	2.84	33.24	33.35	33.2	405.15	396.19	30.634	33.714	57.59	63.38	499.9	0	746	96.26	47.1	-0.0292	0.7	111105
uncut strip	10	14	14:30-15:30	Small	b-3-3	6.16499	0.142927	2.82773	304	1.91	6	1	2.84	33.24	33.36	33.2	405.15	396.16	30.632	33.701	57.58	63.35	499.9	0	746	96.26	47.1	-0.0292	0.7	111105
uncut strip	10	14	14:30-15:30	Small	b-3-3	6.1954	0.130139	2.54217	302	1.91	6	1	2.84	33.24	33.36	33.21	405.22	396.14	30.63	33.665	57.57	63.27	499.9	0	747	96.26	47.1	-0.0292	0.3	111105
uncut strip	10	14	14:30-15:30	Small	b-3-3	5.88515	0.136689	2.4094	301	1.92	6	1	2.84	33.25	33.36	33.21	405.28	396.2	30.627	33.624	57.55	63.18	499.9	0	749	96.26	47.1	-0.0292	0.3	111105
uncut strip	10	14	14:30-15:30	Small	b-3-3	6.21717	0.119105	2.69502	294	1.93	6	1	2.84	33.25	33.36	33.21	405.53	396.07	30.618	33.551	57.52	63.03	499.9	0	752	96.26	47.1	-0.0292	0.3	111105
control		19	9:30-10:30	Large	d-1	0.496041	0.00568219	0.162704	427	1.34	6	1	2.84	30.91	30.24	30.87	401.79	401.62	31.014	30.871	66.77	66.46	499.9	0	103	96.64	290	20.4	1	111105
control		19	9:30-10:30	Large	d-1	-0.311185	0.00393534	0.152557	427	1.34	6	1	2.84	30.91	30.24	30.87	401.79	401.62	31.014	30.871	66.77	66.46	499.9	0	103	96.64	290	20.4	1	111105
control		19	9:30-10:30	Large	d-1	-0.565571	0.000464504	0.0592287	416	1.34	6	1	2.84	30.92	30.25	30.88	401.83	401.74	31.017	30.872	66.76	66.45	499.9	0	103	96.64	290	20.4	1	111105
control		19	9:30-10:30	Large	d-1	0.400743	0.000208292	0.153849	410	1.34	6	1	2.84	30.93	30.25	30.88	401.84	401.79	31.016	30.87	66.73	66.41	499.9	0	103	96.64	290	20.4	1	111105
control		19	9:30-10:30	Large	d-1	0.352994	0.00193788	0.326394	391	1.34	6	1	2.84	30.92	30.24	30.88	401.81	401.88	31.014	30.861	66.73	66.41	499.9	0	103	96.64	290	20.4	1	111105
control		16	9:30-10:30	Medium	d-2	-0.239817	0.00103003	0.0412713	466	1.36	6	1	2.84	30.87	30.35	30.84	398.44	398.26	31.022	30.963	66.94	66.81	499.9	0	94	96.64	290	20.4	0.3	111105
control		16	9:30-10:30	Medium	d-2	-0.603738	0.00155642	0.0634082	466	1.36	6	1	2.84	30.87	30.35	30.84	398.44	398.26	31.022	30.963	66.94	66.81	499.9	0	94	96.64	290	20.4	0.3	111105
control		16	9:30-10:30	Medium	d-2	0.623048	0.0128014	0.17228	469	1.36	6	1	2.84	30.88	30.36	30.85	398.45	398.27	31.022	30.966	66.9	66.78	499.9	0	96	96.64	290	20.4	0.3	111105
control		16	9:30-10:30	Medium	d-2	0.30444	0.0121728	0.0734646	499	1.36	6	1	2.84	30.88	30.36	30.85	398.45	398.22	31.022	30.971	66.91	66.8	499.9	0	98	96.64	290	20.4	0.3	111105
control		16	9:30-10:30	Medium	d-2	0.189842	0.000760526	0.0880692	479	1.36	6	1	2.84	30.9	30.37	30.86	398.46	398.29	31.023	30.975	66.83	66.72	499.9	0	102	96.64	290	20.4	0.3	111105
control		14	9:30-10:30	Small	d-3	1.69797	0.0230602	0.255911	334	1.35	6	1	2.84	30.84	30.51	30.88	402.32	401.06	30.981	31.401	66.99	67.9	499.9	0	75	96.64	290	20.4	0.7	111105
control		14	9:30-10:30	Small	d-3	1.0527	0.0297752	0.323836	334	1.35	6	1	2.84	30.84	30.51	30.88	402.32	401.06	30.981	31.401	66.99	67.9	499.9	0	75	96.64	290	20.4	0.7	111105
control		14	9:30-10:30	Small	d-3	0.506152	0.0345939	0.162264	332	1.35	6	1	2.84	30.84	30.51	30.88	402.28	401	30.98	31.396	66.98	67.88	499.9	0	75	96.64	290	20.4	0.7	111105
control		14	9:30-10:30	Small	d-3	0.974376	0.0175773	0.40711	331	1.35	6	1	2.84	30.84	30.5	30.88	402.27	400.99	30.977	31.382	66.97	67.85	499.9	0	75	96.64	290	20.4	0.7	111105
control		14	9:30-10:30	Small	d-3	0.704042	0.0256219	0.191935	328	1.35	6	1	2.84	30.84	30.49	30.88	402.2	400.89	30.972	31.368	66.96	67.81	499.9	0	74	96.64	290	20.4	0.7	111105
control		19	11:00-12:00	Large	d-1	0.358662	0.0292105	0.705514	426	2.06	6	1	2.84	32.97	32.09	32.98	363.86	365.2	27.8	28.541	52.98	54.4	499.9	0	26	96.13	3.78	0.765	0.3	111105
control		19	11:00-12:00	Large	d-1	0.512866	0.0316318	0.760481	426	2.06	6	1	2.84	32.97	32.09	32.98	363.86	365.2	27.8	28.541	52.98	54.4	499.9	0	26	96.13	3.78	0.765	0.3	111105
control		19	11:00-12:00	Large	d-1	0.493753	0.033627	0.792263	427	2.05	6	1	2.84	32.97	32.08	32.98	363.82	365.18	27.796	28.541	52.97	54.39	499.9	0	25	96.13	3.78	0.765	0.3	111105
control		19	11:00-12:00	Large	d-1	0.414729	0.0331085	0.703025	425	2.05	6	1	2.84	32.98	32.07	32.98	363.83	365.14	27.792	28.539	52.95	54.37	499.9	0	24	96.13	3.78	0.765	0.3	111105
control		19	11:00-12:00	Large	d-1	0.571718	0.0372467	0.617618	423	2.05	6	1	2.84	32.99	32.06	32.99	363.83	365.1	27.788	28.535	52.91	54.33	499.9	0	22	96.13	3.78	0.765	0.3	111105
control		16	11:00-12:00	Medium	d-2	0.0639009	0.0563841	0.966146	348	2.1	6	1	2.84	32.87	32.41	32.93	364.15	363.56	27.679	28.985	53.07	55.57	499.9	0	75	96.13	3.78	0.765	0.7	111105
control		16	11:00-12:00	Medium	d-2	0.565624	0.0485629	0.997532	346	2.1	6	1	2.84	32.87	32.42	32.93	364.14	363.51	27.686	28.961	53.08	55.52	499.9	0	75	96.13	3.78	0.765	0.7	111105
control		16	11:00-12:00	Medium	d-2	-0.125881	0.0450287	1.14645	345	2.11	6	1	2.84	32.86	32.41	32.93	364	363.35	27.705	28.918	53.12	55.45	499.9	0	76	96.13	3.78	0.765	0.7	111105
control		16	11:00-12:00	Medium	d-2	-0.444042	0.0393041	1.08416	344	2.11	6	1	2.84	32.86	32.41	32.93	364.02	363.33	27.706	28.913	53.12	55.44	499.9	0	76	96.13	3.78	0.765	0.7	111105
control		16	11:00-12:00	Medium	d-2	0.605097	0.0423411	1.17409	347	2.11	6	1	2.84	32.86	32.42	32.93	363.95	363.38	27.712	28.906	53.14	55.42	499.9	0	75	96.13	3.78	0.765	0.7	111105
control		14	11:00-12:00	Small	d-3	0.903557	0.0458344	1.07202	330	2.16	6	1	2.84	32.92	32.53	32.96	365.02	363.63	27.292	28.744	52.18	54.95	499.9	0	74	96.13	3.78	0.765	0.7	111105
control		14	11:00-12:00	Small	d-3	1.2318	0.0471661	1.15372	331	2.16	6	1	2.84	32.92	32.53	32.97	365.04	363.7	27.292	28.731	52.17	54.92	499.9	0	70	96.13	3.78	0.765	0.7	111105
control		14	11:00-12:00	Small	d-3	0.692847	0.0449468	1.15022	332	2.16	6	1	2.84	32.92	32.53	32.97	365.01	363.74	27.29	28.721	52.17	54.91	499.9	0	68	96.13	3.78	0.765	0.7	111105
control		14	11:00-12:00	Small	d-3	0.705626	0.0472279	1.13048	333	2.16	6	1	2.84	32.92	32.52	32.97	364.95	363.71	27.289	28.724	52.17	54.91	499.9	0	63	96.13	3.78	0.765	0.7	111105
control		14	11:00-12:00	Small	d-3	1.28993	0.0495289	1.07836	333	2.15	6	1	2.84	32.92	32.51	32.97	364.93	363.7	27.29	28.72	52.17	54.91	499.9	0	62	96.13	3.78	0.765	0.7	111105
control		19	13:00-14:00	Large	d-1	1.70823	0.0299882	0.406906	325	1.42	6	1	2.84	32.05	31.46	32	393.46	391.92	32.664	33.2	65.91	66.99	499.9	0	126	96.64	288	21.4	0.7	111105
control		19	13:00-14:00	Large	d-1	0.519831	0.04006	0.342066	328	1.42	6	1	2.84	32.05	31.45	32.01	393.4	391.93	32.664	33.199	65.91	66.99	499.9	0	127	96.64	288	21.4	0.7	111105
control		19	13:00-14:00	Large	d-1	0.757088	0.0342103	0.621817	330	1.42	6	1	2.84	32.05	31.45	32.01	393.42	392.03	32.67	33.192	65.94	67	499.9	0	127	96.64	288	21.4	0.7	111105
control		19	13:00-14:00	Large	d-1	0.53759	0.0246437	0.298762	332	1.42	6	1	2.84	32.04	31.44	32	393.41	392.07	32.666	33.191	65.97	67.02	499.9	0	128	96.64	288	21.4	0.7	111105
control		19	13:00-14:00	Large	d-1	-0.938272	0.0215923	0.46788	341	1.42	6	1	2.84	32.06	31.44	32.01	393.38	392.19	32.666	33.201	65.9	66.98	499.9	0	129	96.64	288	21.4	0.7	111105
control		19	13:00-14:00	Large	d-1	-2.97199	0.0204764	0.510204	235	1.5	6	1	2.84	32.21	31.54	32.23	417.53	414.07	32.123	32.603	64.17	65.13	499.9	0	61	96.54	295	21.4	0.7	111105
control		19	13:00-14:00	Large	d-1	2.49988	0.0240925	0.216095	236	1.5	6	1	2.84	32.21	31.53	32.23	417.51	414.03	32.124	32.606	64.17	65.13	499.9	0	61	96.54	295	21.4	0.7	111105
control		19	13:00-14:00	Large	d-1	2.91011	0.0238331	0.266844	238	1.5	6	1	2.84	32.21	31.53	32.23	417.54	414.08	32.126	32.612	64.18	65.16	499.9	0	61	96.54	295	21.4	0.7	111105
control		19	13:00-14:00	Large	d-1	2.86687	0.0202316	0.523949	235	1.5	6	1	2.84	32.21	31.53	32.23	417.57	414.08	32.128	32.609	64.19	65.15	499.9	0	61	96.54	295	21.4	0.7	111105
control		19	13:00-14:00	Large	d-1	3.37771	0.0237874	0.423312	235	1.5	6	1	2.84	32.22	31.53	32.23	417.56	414.07	32.129	32.611	64.15	65.12	499.9	0	61	96.54	295	21.4	0.7	111105
control		16	13:00-14:00	Medium	d-2	-0.426862	0.0377424	0.472692	360	1.41	6	1	2.84	32.27	31.52	32.19	388.31	387.69	32.998	33.521	65.78	66.82	499.9	0	89	96.64	288	21.4	0.7	111105
control		16	13:00-14:00	Medium	d-2	0.425134	0.0359852	0.446992	360	1.41	6	1	2.84	32.27	31.52	32.19	388.31	387.69	32.998	33.521	65.78	66.82	499.9	0	89	96.64	288	21.4	0.7	111105
control		16	13:00-14:00	Medium	d-2	0.775675	0.0309549	0.639521	362	1.41	6	1	2.84	32.27	31.51	32.19	388.4	387.82	33.001	33.512	65.78	66.8	499.9	0	89	96.64	288	21.4	0.7	111105
control		16	13:00-14:00	Medium	d-2	-0.13373	0.0375205	0.64153	365	1.41	6	1	2.84	32.28	31.51	32.19	388.52	388	33	33.514	65.74	66.76	499.9	0	89	96.64	288	21.4	0.7	111105
control		16	13:00-14:00	Medium	d-2	0.638782	0.0301986	0.310278	369	1.41	6	1	2.84	32.29	31.52	32.2	388.65	388.24	32.995	33.503	65.69	66.7	499.9	0	89	96.64	288	21.4	0.7	111105
control		16	13:00-14:00	Medium	d-2	0.651015	0.0648254	0.836411	385	1.5	6	1	2.84	32.29	31.66	32.35	399.56	398.98	31.985	33.01	63.63	65.67	499.9	0	52	96.54	292	21.8	0.7	111105
control		16	13:00-14:00	Medium	d-2	0.416863	0.0492426	0.857509	385	1.5	6	1	2.84	32.29	31.66	32.35	399.56	398.99	31.988	33.009	63.63	65.66	499.9	0	52	96.54	292	21.8	0.7	111105
control		16	13:00-14:00	Medium	d-2	0.801475	0.0531514	0.768035	385	1.5	6	1	2.84	32.29	31.66	32.35	399.56	398.99	31.988	33.009	63.63	65.66	499.9	0	52	96.54	292	21.8	0.7	111105
control		16	13:00-14:00	Medium	d-2	0.53274	0.0520365	0.77978	384	1.5	6	1	2.84	32.29	31.66	32.35	399.66	399.03	31.987	33.008	63.63	65.66	499.9	0	52	96.54	292	21.8	0.7	111105
control		16	13:00-14:00	Medium	d-2	-0.12152	0.0587966	0.963643	386	1.5	6	1	2.84	32.29	31.67	32.35	399.64	399.1	31.987	33.008	63.62	65.66	499.9	0	52	96.54	292	21.8	0.7	111105
control		14	13:00-14:00	Small	d-3	-0.317146	-0.0151519	-0.394282	400	1.67	6	1	2.84	32.44	31.93	32.5	394.51	394.46	32.19	31.94	63.49	63	499.9	0	48	96.53	291	20.6	0.7	111105
control		14	13:00-14:00	Small	d-3	0.367766	-0.0180063	-0.125282	399	1.67	6	1	2.84	32.44	31.93	32.5	394.58	394.54	32.194	31.941	63.5	63	499.9	0	48	96.53	291	20.6	0.7	111105
control		14	13:00-14:00	Small	d-3	0.851462	-0.00316138	-0.363078	399	1.67	6	1	2.84	32.44	31.93	32.5	394.58	394.54	32.194	31.941	63.5	63	499.9	0	48	96.53	291	20.6	0.7	111105
control		14	13:00-14:00	Small	d-3	-0.489496	-0.00327469	-0.245768	407	1.67	6	1	2.84	32.44	31.93	32.5	394.73	394.62	32.198	31.952	63.5	63.02	499.9	0	47	96.53	291	20.6	0.7	111105
control		14	13:00-14:00	Small	d-3	-0.010874	-0.00460034	-0.16794	414	1.67	6	1	2.84	32.44	31.92	32.5	394.86	394.68	32.203	31.948	63.51	63.01	499.9	0	47	96.53	291	20.6	0.7	111105
control		14	13:00-14:00	Small	d-3	2.84902	0.0272631	0.405611	247	1.44	6	1	2.84	32.33	31.68	32.29	399.35	395.9	33.1	33.649	65.77	66.86	499.8	0	80	96.63	288	21.4	1	111105
control		14	13:00-14:00	Small	d-3	3.36879	0.0232372	0.531863	254	1.44	6	1	2.84	32.33	31.68	32.29	399.27	395.93	33.097	33.652	65.75	66.85	499.8	0	80	96.63	288	21.4	0.7	111105
control		14	13:00-14:00	Small	d-3	2.36351	0.0230662	0.616254	251	1.44	6	1	2.84	32.33	31.68	32.29	399.2	395.84	33.095	33.641	65.74	66.83	499.8	0	80	96.63	288	21.4	0.7	111105
control		14	13:00-14:00	Small	d-3	2.28091	0.0360137	0.624549	259	1.44	6	1	2.84	32.33	31.68	32.29	399.12	395.91	33.092	33.646	65.72	66.82	499.8	0	79	96.63	288	21.4	0.7	111105
control		14	13:00-14:00	Small	d-3	2.03244	0.0243674	0.515915	266	1.44	6	1	2.84	32.34	31.68	32.29	398.91	395.87	33.087	33.641	65.69	66.79	499.9	0	77	96.63	288	21.4	0.7	111105
control		19	14:30-15:30	Large	d-1	0.454493	0.0670724	1.23611	371	1.88	6	1	2.84	32.99	32.16	33.04	398.67	397.42	29.051	30.523	55.28	58.08	499.9	0	47	96.08	47.1	-0.0292	0.7	111105
control		19	14:30-15:30	Large	d-1	0.291357	0.0707674	1.29372	369	1.88	6	1	2.84	32.99	32.15	33.04	398.75	397.4	29.05	30.523	55.28	58.09	499.9	0	47	96.08	47.1	-0.0292	0.7	111105
control		19	14:30-15:30	Large	d-1	0.136547	0.0596831	1.16239	368	1.88	6	1	2.84	32.99	32.15	33.04	398.91	397.51	29.048	30.518	55.28	58.07	499.9	0	47	96.08	47.1	-0.0292	0.7	111105
control		19	14:30-15:30	Large	d-1	0.353243	0.0681942	1.29515	366	1.88	6	1	2.84	32.99	32.15	33.04	399.1	397.6	29.044	30.519	55.27	58.08	499.9	0	47	96.08	47.1	-0.0292	0.7	111105
control		19	14:30-15:30	Large	d-1	0.637066	0.066387	1.35557	361	1.88	6	1	2.84	32.99	32.14	33.04	399.53	397.79	29.043	30.526	55.27	58.09	499.9	0	47	96.08	47.1	-0.0292	0.7	111105
control		19	14:30-15:30	Large	d-1	0.90336	0.0755965	1.28599	432	1.72	6	1	2.84	32.56	31.52	32.61	393.54	395.52	28.967	30.509	56.46	59.47	499.9	0	25	96.06	52.5	-0.086	0.7	111105
control		19	14:30-15:30	Large	d-1	0.484497	0.0642587	1.13629	432	1.72	6	1	2.84	32.56	31.52	32.61	393.54	395.52	28.967	30.509	56.46	59.47	499.9	0	25	96.06	52.5	-0.086	0.7	111105
control		19	14:30-15:30	Large	d-1	-1.53443	0.0658042	1.46185	433	1.72	6	1	2.84	32.56	31.52	32.61	393.62	395.67	28.967	30.506	56.46	59.45	499.9	0	25	96.06	52.5	-0.086	0.7	111105
control		19	14:30-15:30	Large	d-1	-0.748742	0.0684101	1.11897	435	1.72	6	1	2.84	32.57	31.53	32.62	393.71	395.81	28.969	30.497	56.45	59.42	499.9	0	26	96.06	52.5	-0.086	0.7	111105
control		19	14:30-15:30	Large	d-1	-0.952301	0.0772525	1.1291	436	1.72	6	1	2.84	32.57	31.53	32.62	393.74	395.89	28.978	30.501	56.46	59.43	499.9	0	26	96.06	52.5	-0.086	0.7	111105
control		16	14:30-15:30	Medium	d-2	3.21861	0.1061	2.12133	345	1.77	6	1	2.84	33.14	31.99	33.09	402.26	398.11	28.945	31.227	54.62	58.92	499.9	0	156	96.08	47.1	-0.0292	0.7	111105
control		16	14:30-15:30	Medium	d-2	2.64026	0.101678	2.14978	345	1.77	6	1	2.84	33.14	31.99	33.09	402.26	398.11	28.945	31.227	54.62	58.92	499.9	0	156	96.08	47.1	-0.0292	0.7	111105
control		16	14:30-15:30	Medium	d-2	3.1452	0.112998	2.15917	345	1.77	6	1	2.84	33.13	31.99	33.09	402.2	398.08	28.948	31.221	54.64	58.93	499.9	0	168	96.08	47.1	-0.0292	0.7	111105
control		16	14:30-15:30	Medium	d-2	2.9819	0.104119	1.90644	347	1.77	6	1	2.84	33.12	31.99	33.09	402.15	398.16	28.947	31.215	54.67	58.96	499.9	0	180	96.08	47.1	-0.0292	0.7	111105
control		16	14:30-15:30	Medium	d-2	3.28999	0.105338	1.76399	347	1.77	6	1	2.84	33.12	32	33.09	402.08	398.13	28.95	31.227	54.7	59	499.9	0	202	96.08	47.1	-0.0292	0.7	111105
control		16	14:30-15:30	Medium	d-2	0.595149	0.0695583	1.3457	368	1.81	6	1	2.84	32.72	31.9	32.72	390.14	389.18	29.176	30.541	56.35	58.99	499.9	0	45	96.06	48.7	-0.0393	0.7	111105
control		16	14:30-15:30	Medium	d-2	1.01289	0.0644341	1.26463	368	1.81	6	1	2.84	32.72	31.9	32.72	390.14	389.18	29.176	30.541	56.35	58.99	499.9	0	45	96.06	48.7	-0.0393	0.7	111105
control		16	14:30-15:30	Medium	d-2	1.04778	0.068561	1.15786	369	1.81	6	1	2.84	32.73	31.9	32.73	390.15	389.23	29.177	30.537	56.32	58.94	499.9	0	45	96.06	48.7	-0.0393	0.7	111105
control		16	14:30-15:30	Medium	d-2	0.451137	0.06203	0.972884	366	1.81	6	1	2.84	32.74	31.89	32.73	390.17	389.11	29.178	30.532	56.3	58.91	499.9	0	44	96.06	48.7	-0.0393	0.7	111105
control		16	14:30-15:30	Medium	d-2	0.116309	0.0676529	1.21583	368	1.81	6	1	2.84	32.75	31.87	32.73	390.18	389.23	29.176	30.521	56.25	58.85	499.9	0	43	96.06	48.7	-0.0393	0.7	111105
control		14	14:30-15:30	Small	d-3	1.81492	0.0994526	1.45938	353	1.73	6	1	2.84	32.67	31.86	32.73	397.04	394.29	29.438	31.329	57.03	60.7	499.9	0	28	96.07	48.7	-0.0393	0.7	111105
control		14	14:30-15:30	Small	d-3	1.53141	0.0854879	1.59823	352	1.73	6	1	2.84	32.67	31.86	32.73	397.17	394.39	29.443	31.329	57.04	60.7	499.9	0	28	96.07	48.7	-0.0393	0.7	111105
control		14	14:30-15:30	Small	d-3	1.33447	0.0830821	1.7562	352	1.73	6	1	2.84	32.67	31.86	32.73	397.28	394.44	29.446	31.341	57.05	60.72	499.9	0	28	96.07	48.7	-0.0393	0.7	111105
control		14	14:30-15:30	Small	d-3	1.7384	0.0843889	1.48405	353	1.73	6	1	2.84	32.67	31.86	32.73	397.34	394.56	29.45	31.348	57.05	60.73	499.9	0	27	96.07	48.7	-0.0393	0.7	111105
control		14	14:30-15:30	Small	d-3	2.33258	0.0885771	1.78279	354	1.72	6	1	2.84	32.67	31.85	32.73	397.51	394.79	29.459	31.346	57.07	60.73	499.9	0	27	96.07	48.7	-0.0393	0.7	111105
control		14	14:30-15:30	Small	d-3	5.05644	0.112772	2.28688	301	1.88	6	1	2.84	32.89	32.33	32.86	395.73	388.36	28.429	31.046	54.41	59.42	499.9	0	160	96.08	47.1	-0.0292	0.7	111105
control		14	14:30-15:30	Small	d-3	4.60822	0.107855	2.23938	301	1.88	6	1	2.84	32.89	32.34	32.86	395.61	388.28	28.431	31.05	54.42	59.43	499.9	0	174	96.08	47.1	-0.0292	0.7	111105
control		14	14:30-15:30	Small	d-3	4.88256	0.110424	2.15875	300	1.89	6	1	2.84	32.89	32.34	32.86	395.54	388.12	28.43	31.049	54.42	59.43	499.9	0	188	96.08	47.1	-0.0292	0.7	111105
control		14	14:30-15:30	Small	d-3	6.02669	0.121829	2.29547	299	1.89	6	1	2.84	32.88	32.35	32.86	395.48	388.03	28.434	31.041	54.44	59.43	499.9	0	200	96.08	47.1	-0.0292	0.7	111105
control		14	14:30-15:30	Small	d-3	4.89328	0.12162	2.0389	300	1.89	6	1	2.84	32.87	32.35	32.86	395.3	387.95	28.435	31.03	54.47	59.45	499.9	0	237	96.08	47.1	-0.0292	0.7	111105
