# Supplementary material for: Effect of strip clear-cutting on the natural regeneration of Pinus tabuliformis plantations in northeastern China
Source: PeerJ. 2022 Apr 28;10:e13341. doi: 10.7717/peerj.13341 (PMC9057292; doi:10.7717/peerj.13341)
Supplement: Supplemental Information 3 [file peerj-10-13341-s003.xlsx]

## Sheet: sapling regeneration
Type	Width	number plot	number of seeding	number of saping	sapling number	effect sapling (height>30cm)、seeding (height<30cm)			branch length for the first whorl
						age	current height/cm	total height/cm	branch 1	branch 2	branch 3	branch 4	branch 5	branch 6	branch 7
clear-cut strip	25	1	0	3	1	22	16	210	9.5	7	15	7.5	8
clear-cut strip	25	1	0	3	2	15	15	255	6.5	8	11.5
clear-cut strip	25	2	0	6	1	20	15	185	6	10	9	8.5	8.5
clear-cut strip	25	2	0	6	2	16	20.3	177	6.5	12	10
clear-cut strip	25	2	0	6	3	15	15.5	168	7.5	8	10
clear-cut strip	25	3	0	12	1	20	17	205	12	12	12.5	10
clear-cut strip	25	3	0	12	2	18	13.5	95	10.2	4.5	12
clear-cut strip	25	3	0	12	3	17	10.8	178	12	7.5	8	11
clear-cut strip	25	4	0	7	1	14	14	120	15.5113	12.6558	13.7068
clear-cut strip	25	4	0	7	2	17	17	140	14.0412	10.1061	6.6249
clear-cut strip	25	4	0	7	3	16	16	114	18.2675	14.4671	20.8143	15	16	11
clear-cut strip	25	4	0	7	4	12	22	132	16.4083	15.7421	23.964	23	10
clear-cut strip	25	5	0	4	1	15	18	122	10.0687	12.4211	12.2139
clear-cut strip	25	5	0	4	2	17	22	108	15.4224	9.03721
clear-cut strip	25	8	0	18	1	15	110	155	8.87623	20.981	27.8089	30	22
clear-cut strip	25	8	0	18	2	11	135	135	9.27293	13.6744	17.0112	10
clear-cut strip	25	8	0	18	3	16	40	175	26.9697	16.5318	17.7655	14
clear-cut strip	25	9	0	15	1	18	15	190	16.9897	7.41937	9.10775	8	12.5
clear-cut strip	25	9	0	15	2	22	25	205	10.667	13.9429	11.46	11
clear-cut strip	25	9	0	15	3	14	35	166	13.5811	23.7822	12.1058	10	21
clear-cut strip	25	10	0	5	1	16	20	175	6.26108	11.9979	14.9627	9	12	11
clear-cut strip	25	10	0	5	2	17	18	145	14.8919	22.0431	18.0875
clear-cut strip	25	10	0	5	3	20	16	208	4.62387	12.8445	15.2875	11
clear-cut strip	25	11	0	10	1	20	28	210	13.315	20.9286	9.60327	20	16
clear-cut strip	25	11	0	10	2	16	30	160	20.2971	20.2519	25.4264	21
clear-cut strip	25	11	0	10	3	15	15.5	175	7.41718	16.3441	15.7939
clear-cut strip	25	12	0	6	1	14	17	150	12.1963	16.5172	14.2639	16	12
clear-cut strip	25	12	0	6	2	21	11	220	9.90849	14.3693	15.6614
clear-cut strip	25	12	0	6	3	16	16.5	180	12.8416	11.0962	9.83907	12
clear-cut strip	25	13	0	3	1	17	11	125	15.5077	15.1196	20.691
clear-cut strip	25	14	0	7	1	11	16	140	10.4044	20.5011	16.2292	15
clear-cut strip	25	14	0	7	2	18	20	200	19.5292	22.2309	18.016
clear-cut strip	25	14	0	7	3	15	15	133	13.1542	13.1455	12.1365	15
clear-cut strip	25	15	0	11	1	15	17	155	12.9526	16.2197
clear-cut strip	25	15	0	11	2	22	18	205	16.4652	15.7228	21.5412
clear-cut strip	25	15	0	11	3	14	16	140	5.90998	11.6478	15.6636
clear-cut strip	20	1	0	6	1	20	18	150	15.1494	10.3667	10.9303
clear-cut strip	20	2	0	18	1	14	10	122	6.26827	3.6458	3.08148
clear-cut strip	20	2	0	18	2	16	9	155	5.79611	11.5152	12.2869
clear-cut strip	20	2	0	18	3	22	18	172	2.05346	7.67542	9.35062
clear-cut strip	20	3	0	34	1	18	14	160	10.8527	15.0293
clear-cut strip	20	3	0	34	2	20	10	170	5.70268	8.50811	5.03386
clear-cut strip	20	3	0	34	3	17	8	180	6.4881	6.83567
clear-cut strip	20	3	0	34	4	21	6.5	170	5.82778	5.5479	7.47779
clear-cut strip	20	4	0	4	1	20	6	175	1.75367	7.60163	7.92395
clear-cut strip	20	4	0	4	2	20	5	165	3.66396	3.54713	5.42131
clear-cut strip	20	5	0	12	1	21	10	260	8.72344	11.7245	4.25749
clear-cut strip	20	5	0	12	2	22	13	274	12.164	7.81795	11.7128
clear-cut strip	20	6	0	10	1	18	15	221	9.39639	10.7279
clear-cut strip	20	6	0	10	2	20	20	201	10.6734	9.04698	7.8026
clear-cut strip	20	7	0	18	1	20	12	210	9.34105	5.2125
clear-cut strip	20	7	0	18	2	16	14.5	133	12.2718	13.2607	11.781
clear-cut strip	20	7	0	18	3	20	11	285	9.67033	11.2685	9.76898	3.5
clear-cut strip	20	8	0	18	1	15	12	165	13.116	9.7636	12.1979	10
clear-cut strip	20	8	0	18	2	18	28	170	9.5197	19.9979	25.088	20
clear-cut strip	20	8	0	18	3	18	21	145	6.31371	12.1587	8.08194	12
clear-cut strip	20	8	0	18	4	20	18.5	178	8.34227	18.0512	11.6703	15	19
clear-cut strip	20	8	0	18	5	21	20	180	6.99867	12.1625	4.72498	12
clear-cut strip	20	9	0	11	1	20	25	190	14.5276	8.70094	17.9238	14
clear-cut strip	20	9	0	11	2	18	26	155	18.8047	21.1721	14.3333
clear-cut strip	20	10	0	3	1	22	22	180	18.1231	17.5339
clear-cut strip	20	10	0	3	2	15	14	100	11.6352	10.5736
clear-cut strip	20	11	0	14	1	22	14	158	5.07421	10.9722	11.6329
clear-cut strip	20	11	0	14	2	17	18	190	14.6399	9.64278	5.11665	11
clear-cut strip	20	11	0	14	3	17	8	155	4.80983	6.47373	7.7106
clear-cut strip	20	11	0	14	4	24	20	220	17.3293	18.0703	12.6835
clear-cut strip	20	12	0	30	1	20	17.5	180	15.3401	12.6555	12.4972
clear-cut strip	20	12	0	30	2	19	19	177	1.4785	13.5252	14.7153
clear-cut strip	20	12	0	30	3	23	12	210	9.59385	10.7903	3.31077
clear-cut strip	20	12	0	30	4	19	15.5	185	12.6724	11.8611	11.805	8
clear-cut strip	20	13	0	5	1	15	10	105	8.46543	11.838	13.0115
clear-cut strip	20	13	0	5	2	22	16	201	8.16334	8.27118
clear-cut strip	20	14	0	12	1	20	11	280	6.62244	3.70793
clear-cut strip	20	14	0	12	2	15	9	210	6.29766	6.80254	3.76915
clear-cut strip	20	14	0	12	3	18	9	115	3.5496	2.11921	2.17214
clear-cut strip	20	15	0	7	1	20	22	205	14.859	7.23019	15.4433
clear-cut strip	20	15	0	7	2	25	19	225	14.5406	13.4241
clear-cut strip	20	15	0	7	3	18	11	180	4.6634	5.23174
clear-cut strip	15	1	0	5	1	18	12	130	6.79973	3.68312	9.7595
clear-cut strip	15	1	0	5	2	10	10	105	9.17502	11.841	4.02975
clear-cut strip	15	2	0	2	1	18	11	120	3.55269	4.89999
clear-cut strip	15	3	0	4	1	11	11	56	12.7398	9.78692
clear-cut strip	15	3	0	4	2	14	12	95	12.3582	8.58914	2.2959
clear-cut strip	15	4	0	8	1	12	12	85	8.324	7.61156	10.3421
clear-cut strip	15	4	0	8	2	20	16	150	15.1232	14.6315	10.2537
clear-cut strip	15	4	0	8	3	18	15	155	14.2847	12.5698	7.39844	16
clear-cut strip	15	5	0	2	1	15	16	120	12.0723	13.9395	7.79777
clear-cut strip	15	6	0	8	1	18	15	150	13.3715	14.1991	10.7142
clear-cut strip	15	6	0	8	2	20	30	155	31.5697	22.2052	29.4027	11
clear-cut strip	15	7	0	7	1	11	21	110	25.7148	20.2008	19.6299	22
clear-cut strip	15	7	0	7	2	15	18	135	17.7665	12.3118
clear-cut strip	15	8	0	6	1	11	22	183	7.00314	15.8747	18.6528	4	11
clear-cut strip	15	8	0	6	2	22	18	145	18.7479	2.31807	9.7848	15
clear-cut strip	15	8	0	6	3	21	20	145	19.8087	14.5188	6.67706	15	14
clear-cut strip	15	9	0	21	1	22	8	260	11.352	9.32985
clear-cut strip	15	9	0	21	2	18	11	122	6.28659	9.35163	9.09978
clear-cut strip	15	9	0	21	3	12	9.5	150	7.67593	6.0008	3.17063
clear-cut strip	15	9	0	21	4	21	11	115	4.2763	8.24538	7.44017	10
clear-cut strip	15	10	0	16	1	20	20	260	8.28707	15.4051	13.8116	9	11
clear-cut strip	15	10	0	16	2	18	12	255	7.83048	10.6899	11.7194	11
clear-cut strip	15	11	0	13	1	18	15	270	13.7415	8.74283
clear-cut strip	15	11	0	13	2	21	22	266	9.57781	3.99343	5.19695
clear-cut strip	15	11	0	13	3	22	13	188	6.37752	8.43691
clear-cut strip	15	12	0	1	1	17	10	111	7.58863	5.37766
clear-cut strip	15	13	0	15	1	14	21	131	16.7092	3.05323	18.4913	14	17
clear-cut strip	15	13	0	15	2	19	13	130	1.60715	5.32639	9.77281
clear-cut strip	15	13	0	15	3	12	22	110	5.09274	12.5154	16.3619	12
clear-cut strip	15	13	0	15	4	14	15	140	14.508	11.2956	16.3813	11
clear-cut strip	15	14	0	19	1	20	22	250	19.2376	19.2209	19.8585	20
clear-cut strip	15	14	0	19	2	15	23	155	16.5407	19.3335
clear-cut strip	15	14	0	19	3	20	15	175	7.11337	5.19081	9.6168
clear-cut strip	15	14	0	19	4	17	18	270	10.7794	3.20555	10.5607
clear-cut strip	15	15	0	12	1	11	14	160	12.2825	8.04085	7.62591	8.5
clear-cut strip	15	15	0	12	2	23	11	188	8.78754	11.4264	6.237
clear-cut strip	15	15	0	12	3	25	6	145	6.97505	5.67439
clear-cut strip	15	15	0	12	4	21	11	120	9.49543	10.6388	5.2594
uncut strip	18	1	0	7	1	15	8.5	120	4.57805	9.13597
uncut strip	18	1	0	7	2	20	7.5	122	7.62102
uncut strip	18	2	0	8	1	20	8	120	6.94191
uncut strip	18	2	0	8	2	15	11	122	7.12508
uncut strip	18	3	0	3	1	20	40	108	6.97549	5.5
uncut strip	18	4	0	2	1	18	11	125	9.08898	6
uncut strip	18	5	0	1	1	21	11	218	11.7897	9
uncut strip	18	6	0	1	1	11	15	105	8.76525	10	7.04932
uncut strip	18	7	0	5	1	14	7	137	6.82642
uncut strip	18	7	0	5	2	21	15	230	4.99846	10
uncut strip	18	7	0	5	3	20	15	188	9.65723	4
uncut strip	18	8	0	12	1	20	10	204	3.52669	7
uncut strip	18	10	0	5	1	18	8.3	150	4.49905	7
uncut strip	18	10	0	3	2	18	7	160	4.08549
uncut strip	18	12	0	3	1	11	12	77	6.19836	5
uncut strip	18	13	0	2	1	15	11	148	9.56466	8	2.56887
uncut strip	18	13	0	2	2	20	4	150	2.78296
uncut strip	18	14	0	3	1	18	15	221	4.60826	4
uncut strip	18	14	0	3	2	15	16	200	7.48823	8
uncut strip	18	15	0	23	1	18	22	200	7.26314	6.8
uncut strip	18	15	0	23	2	21	10	255	9.55628	10	7.89386	10	7
uncut strip	18	15	0	23	3	19	12	242	9.39715	3.4
uncut strip	10	1	0	6	1	20	16	150	6.68854	12.5	6.16986	6.5
uncut strip	10	1	0	6	2	15	13	188	4.02167	5
uncut strip	10	2	2	9	1	15	10	122	8.11255	3.8	6.86766
uncut strip	10	2	2	9	2	19	9	156	3.85964	4	8.55045
uncut strip	10	4	0	12	1	18	5	109	8.29385	6.5
uncut strip	10	4	0	12	2	22	8.5	188	5.66334	9	2.16517
uncut strip	10	4	0	12	3	23	15.6	211	6.29316	5
uncut strip	10	5	0	2	1	22	20	305	7.56219	6.5	7.44423
uncut strip	10	6	0	4	2	16	8.5	205	3.36777	7	7.29183
uncut strip	10	7	0	3	1	22	10.5	155	12.1075	10
uncut strip	10	7	0	3	2	16	6	132	5.91333
uncut strip	10	8	0	5	1	18	5	98	5.59475	6.5
uncut strip	10	8	0	5	2	17	8	100	5.66912
uncut strip	10	9	0	5	1	17	8.5	105	6.25851
uncut strip	10	9	0	5	2	18	9.5	166	3.66776	1.5
uncut strip	10	9	0	5	3	21	15	185	10.5314	8	7
uncut strip	10	10	0	3	1	20	11	160	5.08096
uncut strip	10	10	0	3	2	18	4	130	3.52283	6
uncut strip	10	10	0	3	3	14	9	155	4.93425	4.5
uncut strip	10	11	0	2	1	17	8	106	4.19621	5
uncut strip	10	12	0	3	2	20	5	152	6.20807
uncut strip	10	15	0	16	1	26	10	175	3.71321
uncut strip	10	15	0	16	2	13	10	115	7.19752	5
uncut strip	10	15	0	16	3	21	8.5	195	5.3311
control		3	0	6	1	19	24	260	17.7472	16
control		3	0	6	2	20	27	292	18.9497	19
control		4	1	3	1	13	6.5	95	4.12193	4
control		4	1	3	2	14	7	97	1.38834
control		5	0	12	1	17	11	180	6.58695	11
control		5	0	12	2	19	12	180	2.34925
control		5	0	12	3	20	18	176	12.9181	13
control		5	0	12	4	11	5	50	3.21443	1
control		6	0	3	2	15	6	110	7.59103
control		7	0	11	1	19	12	142	6.9747
control		7	0	11	2	14	6	105	0.314922	3.5
control		7	0	11	3	18	8	152	5.14708
control		8	0	7	1	18	10	205	9.75876	1
control		9	0	3	1	19	13	220	9.06987
control		10	0	3	1	18	8	20	0.465986
control		11	0	1	1	16	8	75	0.491025	5.2	8
control		12	0	3	1	19	15.5	168	8.2033	3.5	8
control		13	0	3	1	20	15	253	14.8744	5	14
control		14	0	8	1	20	7	150	1.94479
control		14	0	8	2	17	13	168	11.4451	5
control		15	0	5	1	19	11	150	5.45841
control		15	0	5	2	16	6	69	2.10479

## Sheet: photosynthesis
TYPE	Type	age	period	sapling type	sapling number	Photo	stomatal conductance	transpiration rate	Ci	VpdL	Area	StmRat	BLCond	Tair	Tleaf	TBlk	CO2R	CO2S	H2OR	H2OS	RH_R	RH_S	Flow	PARi	PARo	Press	CsMch	HsMch	StableF	Status
clear-cut strip	25	27	9:30-10:30	Large	c-25-1	3.51072	0.060017	1.14179	271	1.68	6	1	2.84	31.56	32.7	31.41	394.79	388.74	32.53	33.946	67.64	70.58	499.9	0	1202	96.85	290	21.4	0.7	111105
clear-cut strip	25	27	9:30-10:30	Large	c-25-1	4.31329	0.0602104	1.04607	272	1.68	6	1	2.84	31.57	32.7	31.42	394.77	388.75	32.526	33.948	67.6	70.56	499.9	0	1197	96.85	290	21.4	0.7	111105
clear-cut strip	25	27	9:30-10:30	Large	c-25-1	4.34428	0.057818	1.26665	272	1.68	6	1	2.84	31.57	32.7	31.42	394.75	388.69	32.522	33.95	67.58	70.55	499.9	0	1191	96.85	290	21.4	0.7	111105
clear-cut strip	25	27	9:30-10:30	Large	c-25-1	3.91527	0.0851767	1.2347	273	1.68	6	1	2.84	31.57	32.7	31.42	394.74	388.7	32.515	33.954	67.59	70.58	499.9	0	1185	96.85	290	21.4	0.7	111105
clear-cut strip	25	27	9:30-10:30	Large	c-25-1	3.58145	0.0846403	1.40286	275	1.68	6	1	2.84	31.58	32.71	31.42	394.69	388.74	32.512	33.95	67.55	70.53	499.9	0	1177	96.85	290	21.4	0.7	111105
clear-cut strip	25	13	9:30-10:30	Medium	c-25-2	5.1442	0.0858543	1.6934	276	1.72	6	1	2.84	32.18	32.98	32	394.5	387.16	32.494	34.351	65.26	68.99	499.8	0	1189	96.86	290	21.4	0.7	111105
clear-cut strip	25	13	9:30-10:30	Medium	c-25-2	4.85855	0.0914948	1.47105	277	1.72	6	1	2.84	32.18	32.97	32	394.45	387.15	32.499	34.355	65.26	68.99	499.8	0	1188	96.86	290	21.4	0.7	111105
clear-cut strip	25	13	9:30-10:30	Medium	c-25-2	4.25796	0.0828098	1.6525	277	1.72	6	1	2.84	32.19	32.97	32.01	394.41	387.17	32.508	34.357	65.24	68.94	499.8	0	1185	96.86	290	21.4	0.7	111105
clear-cut strip	25	13	9:30-10:30	Medium	c-25-2	6.56784	0.0860801	1.67154	279	1.71	6	1	2.84	32.2	32.97	32.01	394.34	387.19	32.517	34.365	65.21	68.92	499.8	0	1182	96.86	290	21.4	0.7	111105
clear-cut strip	25	13	9:30-10:30	Medium	c-25-2	4.36774	0.077669	1.37036	278	1.72	6	1	2.84	32.21	32.97	32.02	394.23	387.12	32.534	34.364	65.2	68.86	499.8	0	1173	96.86	290	21.4	0.7	111105
clear-cut strip	25	9	9:30-10:30	Small	c-25-3	6.61223	0.112247	2.24836	248	1.91	6	1	2.84	32.43	33.47	32.24	400.95	390.69	31.617	33.854	62.58	67.01	499.8	0	1674	96.87	290	21.4	0.7	111105
clear-cut strip	25	9	9:30-10:30	Small	c-25-3	7.27901	0.0904693	2.18053	248	1.91	6	1	2.84	32.44	33.46	32.24	400.93	390.64	31.616	33.859	62.58	67.02	499.8	0	1673	96.87	290	21.4	0.7	111105
clear-cut strip	25	9	9:30-10:30	Small	c-25-3	7.3428	0.109168	1.6179	248	1.91	6	1	2.84	32.44	33.46	32.24	400.91	390.66	31.619	33.861	62.58	67.02	499.8	0	1671	96.87	290	21.4	0.7	111105
clear-cut strip	25	9	9:30-10:30	Small	c-25-3	7.40703	0.120218	1.71294	249	1.9	6	1	2.84	32.44	33.46	32.25	400.91	390.71	31.62	33.858	62.56	66.99	499.8	0	1670	96.87	290	21.4	0.7	111105
clear-cut strip	25	9	9:30-10:30	Small	c-25-3	6.58916	0.0763711	1.89802	251	1.9	6	1	2.84	32.45	33.45	32.25	400.84	390.76	31.621	33.862	62.54	66.97	499.8	0	1670	96.87	290	21.4	0.7	111105
clear-cut strip	25	27	11:00-12:00	Large	c-25-1	6.37422	0.0748499	2.4964	189	3.68	6	1	2.84	37.05	38.42	36.92	359.25	351.3	29.501	32.447	44.96	49.45	499.9	0	1813	96.37	4.73	0.512	0.3	111105
clear-cut strip	25	27	11:00-12:00	Large	c-25-1	5.73154	0.0712398	2.64343	190	3.67	6	1	2.84	37.06	38.41	36.92	359.25	351.32	29.52	32.48	44.99	49.5	499.9	0	1810	96.37	4.73	0.512	0.3	111105
clear-cut strip	25	27	11:00-12:00	Large	c-25-1	5.72407	0.0570133	2.73328	188	3.67	6	1	2.84	37.06	38.41	36.92	359.24	351.26	29.566	32.509	45.04	49.52	499.9	0	1806	96.37	4.73	0.512	0.3	111105
clear-cut strip	25	27	11:00-12:00	Large	c-25-1	6.3852	0.0566702	2.26413	187	3.68	6	1	2.84	37.07	38.43	36.93	359.23	351.2	29.606	32.546	45.09	49.56	499.9	0	1803	96.37	4.73	0.512	0.3	111105
clear-cut strip	25	27	11:00-12:00	Large	c-25-1	6.20622	0.0620374	2.7019	180	3.7	6	1	2.84	37.08	38.51	36.93	359.24	350.96	29.683	32.613	45.18	49.64	499.9	0	1803	96.37	4.73	0.512	0.3	111105
clear-cut strip	25	27	11:00-12:00	Large	c-25-1	4.55192	0.0632638	1.34856	229	2.01	6	1	2.84	33.69	34.04	33.65	389.85	383.9	33.223	34.493	61.28	63.62	500	0	692	96.86	288	21.8	0.7	111105
clear-cut strip	25	27	11:00-12:00	Large	c-25-1	4.9482	0.0471368	1.04791	229	2.01	6	1	2.84	33.69	34.04	33.65	389.85	383.9	33.223	34.493	61.28	63.62	500	0	692	96.86	288	21.8	0.7	111105
clear-cut strip	25	27	11:00-12:00	Large	c-25-1	4.85964	0.0462832	1.36102	235	2.01	6	1	2.84	33.7	34.04	33.65	389.68	383.99	33.239	34.502	61.29	63.62	500	0	695	96.86	288	21.8	0.7	111105
clear-cut strip	25	27	11:00-12:00	Large	c-25-1	3.77369	0.0577669	0.962291	245	2.01	6	1	2.84	33.7	34.04	33.65	389.46	384.14	33.257	34.518	61.31	63.64	500	0	699	96.86	288	21.8	0.7	111105
clear-cut strip	25	27	11:00-12:00	Large	c-25-1	3.82422	0.0543408	0.904977	251	2.01	6	1	2.84	33.7	34.04	33.66	389.32	384.24	33.27	34.525	61.33	63.64	500	0	701	96.86	288	21.8	0.7	111105
clear-cut strip	25	13	11:00-12:00	Medium	c-25-2	1.99684	0.0890462	2.78276	309	2.93	6	1	2.84	37.02	36.21	36.93	363.31	359.92	28.992	32.191	44.27	49.15	499.9	0	623	96.38	4.73	0.512	0.7	111105
clear-cut strip	25	13	11:00-12:00	Medium	c-25-2	1.62292	0.0910047	2.89058	309	2.93	6	1	2.84	37.02	36.21	36.93	363.31	359.92	28.992	32.191	44.27	49.15	499.9	0	623	96.38	4.73	0.512	0.7	111105
clear-cut strip	25	13	11:00-12:00	Medium	c-25-2	0.811473	0.101038	2.72452	320	2.94	6	1	2.84	37.02	36.21	36.93	363.29	360.6	28.986	32.194	44.26	49.16	499.9	0	627	96.38	4.73	0.512	0.7	111105
clear-cut strip	25	13	11:00-12:00	Medium	c-25-2	1.13937	0.0914687	2.69082	329	2.94	6	1	2.84	37.02	36.22	36.93	363.3	361.19	28.985	32.188	44.26	49.15	499.9	0	634	96.38	4.73	0.512	0.7	111105
clear-cut strip	25	13	11:00-12:00	Medium	c-25-2	0.815764	0.096703	2.57132	350	2.94	6	1	2.84	37.02	36.22	36.92	363.28	362.42	28.977	32.182	44.26	49.15	499.9	0	649	96.38	4.73	0.512	0.7	111105
clear-cut strip	25	13	11:00-12:00	Medium	c-25-2	3.10913	0.0529058	1.1465	264	2	6	1	2.84	33.88	34.28	33.83	385.52	380.9	34.057	35.353	62.16	64.52	499.9	0	915	96.86	288	21.8	1	111105
clear-cut strip	25	13	11:00-12:00	Medium	c-25-2	3.18188	0.0740476	1.39619	264	2	6	1	2.84	33.88	34.28	33.83	385.52	380.9	34.057	35.353	62.16	64.52	499.9	0	915	96.86	288	21.8	1	111105
clear-cut strip	25	13	11:00-12:00	Medium	c-25-2	3.82043	0.0631721	1.29434	265	2	6	1	2.84	33.88	34.28	33.84	385.49	380.89	34.052	35.349	62.14	64.51	499.9	0	915	96.86	288	21.8	1	111105
clear-cut strip	25	13	11:00-12:00	Medium	c-25-2	2.95197	0.0450967	1.11128	266	2	6	1	2.84	33.88	34.28	33.84	385.49	380.92	34.046	35.346	62.13	64.5	499.9	0	916	96.86	288	21.8	1	111105
clear-cut strip	25	13	11:00-12:00	Medium	c-25-2	3.93489	0.0370568	1.22839	269	2	6	1	2.84	33.89	34.27	33.84	385.45	381	34.037	35.337	62.1	64.47	499.9	0	917	96.86	288	21.8	1	111105
clear-cut strip	25	9	11:00-12:00	Small	c-25-3	5.29951	0.0944029	3.39614	237	3.37	6	1	2.84	37.15	37.83	36.95	361.59	353.3	29.488	33.422	44.7	50.66	499.9	0	1592	96.38	4.73	0.512	1	111105
clear-cut strip	25	9	11:00-12:00	Small	c-25-3	6.08358	0.0832862	3.74924	236	3.39	6	1	2.84	37.15	37.87	36.95	361.64	353.21	29.467	33.435	44.68	50.69	499.9	0	1604	96.38	4.73	0.512	1	111105
clear-cut strip	25	9	11:00-12:00	Small	c-25-3	6.5945	0.0854535	3.56683	236	3.41	6	1	2.84	37.15	37.92	36.95	361.74	353.29	29.434	33.434	44.63	50.69	499.9	0	1610	96.38	4.73	0.512	1	111105
clear-cut strip	25	9	11:00-12:00	Small	c-25-3	5.81639	0.0851198	3.17603	238	3.41	6	1	2.84	37.15	37.93	36.95	361.73	353.44	29.418	33.424	44.6	50.67	499.9	0	1606	96.38	4.73	0.512	0.7	111105
clear-cut strip	25	9	11:00-12:00	Small	c-25-3	6.00486	0.0804941	3.53452	239	3.41	6	1	2.84	37.15	37.93	36.95	361.75	353.51	29.41	33.419	44.59	50.66	499.9	0	1605	96.38	4.73	0.512	0.7	111105
clear-cut strip	25	9	11:00-12:00	Small	c-25-3	4.8728	0.0936981	1.69822	287	1.86	6	1	2.84	34.03	34.04	33.96	381.97	376.4	34.169	36.06	61.83	65.25	499.9	0	975	96.87	288	21.8	0.7	111105
clear-cut strip	25	9	11:00-12:00	Small	c-25-3	3.53341	0.0973206	1.52386	287	1.86	6	1	2.84	34.04	34.04	33.96	381.86	376.31	34.171	36.062	61.82	65.24	499.9	0	975	96.87	288	21.8	0.7	111105
clear-cut strip	25	9	11:00-12:00	Small	c-25-3	2.96071	0.0800863	1.6689	288	1.86	6	1	2.84	34.04	34.04	33.96	381.76	376.29	34.179	36.064	61.83	65.24	499.9	0	976	96.87	288	21.8	0.7	111105
clear-cut strip	25	9	11:00-12:00	Small	c-25-3	3.96648	0.0820478	1.48648	289	1.86	6	1	2.84	34.04	34.04	33.97	381.66	376.26	34.182	36.062	61.84	65.24	499.9	0	976	96.87	288	21.8	0.7	111105
clear-cut strip	25	9	11:00-12:00	Small	c-25-3	3.29447	0.0968738	1.49504	289	1.86	6	1	2.84	34.05	34.04	33.97	381.51	376.15	34.194	36.066	61.84	65.22	499.9	0	976	96.87	288	21.8	0.7	111105
clear-cut strip	25	27	13:00-14:00	Large	c-25-1	2.65816	0.0635153	1.7304	267	2.54	6	1	2.84	34.19	34.74	34.13	371.83	367.5	29.583	31.381	52.76	55.97	499.9	0	1133	96.3	2.71	0.729	0.7	111105
clear-cut strip	25	27	13:00-14:00	Large	c-25-1	2.0561	0.0496335	1.493	266	2.54	6	1	2.84	34.19	34.74	34.14	371.66	367.27	29.594	31.4	52.77	55.99	499.9	0	1260	96.3	2.71	0.729	1	111105
clear-cut strip	25	27	13:00-14:00	Large	c-25-1	3.35798	0.0652957	1.64665	267	2.54	6	1	2.84	34.19	34.74	34.14	371.46	367.11	29.604	31.41	52.78	56	499.9	0	1271	96.3	2.71	0.729	0.7	111105
clear-cut strip	25	27	13:00-14:00	Large	c-25-1	3.14167	0.0528389	1.30801	265	2.54	6	1	2.84	34.2	34.74	34.14	371.21	366.81	29.615	31.418	52.8	56.01	499.9	0	1273	96.3	2.71	0.729	0.7	111105
clear-cut strip	25	27	13:00-14:00	Large	c-25-1	4.00978	0.0705114	1.40508	267	2.54	6	1	2.84	34.2	34.76	34.14	370.73	366.46	29.649	31.44	52.84	56.03	499.9	0	1284	96.3	2.71	0.729	0.7	111105
clear-cut strip	25	27	13:00-14:00	Large	c-25-1	2.39921	0.0855561	1.32564	322	1.59	6	1	2.84	32.7	32.49	32.71	383.73	380.34	32.743	34.252	63.78	66.72	499.9	0	407	96.79	288	21.8	0.7	111105
clear-cut strip	25	27	13:00-14:00	Large	c-25-1	2.6707	0.0766143	1.33733	320	1.59	6	1	2.84	32.71	32.48	32.71	383.73	380.27	32.742	34.25	63.78	66.71	499.9	0	407	96.79	288	21.8	0.7	111105
clear-cut strip	25	27	13:00-14:00	Large	c-25-1	2.90914	0.0646101	1.19699	321	1.59	6	1	2.84	32.71	32.48	32.71	383.73	380.27	32.735	34.252	63.76	66.71	499.9	0	407	96.79	288	21.8	0.7	111105
clear-cut strip	25	27	13:00-14:00	Large	c-25-1	2.54344	0.0873484	1.11411	319	1.59	6	1	2.84	32.71	32.48	32.72	383.73	380.16	32.732	34.254	63.75	66.71	499.9	0	407	96.79	288	21.8	0.7	111105
clear-cut strip	25	27	13:00-14:00	Large	c-25-1	3.33521	0.0718478	1.59846	319	1.59	6	1	2.84	32.71	32.48	32.72	383.69	380.16	32.731	34.248	63.74	66.7	499.9	0	406	96.79	288	21.8	0.7	111105
clear-cut strip	25	13	13:00-14:00	Medium	c-25-2	2.63364	0.0623579	2.11988	280	2.5	6	1	2.84	34.52	34.84	34.43	367.26	362.45	29.816	32.199	52.22	56.39	499.9	0	1294	96.3	2.71	0.729	0.7	111105
clear-cut strip	25	13	13:00-14:00	Medium	c-25-2	3.09719	0.088336	1.82884	278	2.5	6	1	2.84	34.52	34.84	34.43	367.26	362.33	29.807	32.218	52.2	56.42	499.9	0	1293	96.3	2.71	0.729	1	111105
clear-cut strip	25	13	13:00-14:00	Medium	c-25-2	4.16185	0.0790576	2.08661	279	2.5	6	1	2.84	34.52	34.84	34.43	367.24	362.3	29.802	32.23	52.19	56.44	499.9	0	1292	96.3	2.71	0.729	1	111105
clear-cut strip	25	13	13:00-14:00	Medium	c-25-2	4.4459	0.0924581	1.93961	279	2.5	6	1	2.84	34.52	34.85	34.43	367.19	362.25	29.797	32.241	52.17	56.45	499.9	0	1292	96.3	2.71	0.729	1	111105
clear-cut strip	25	13	13:00-14:00	Medium	c-25-2	2.50515	0.073135	2.08561	280	2.5	6	1	2.84	34.53	34.86	34.44	367.14	362.13	29.776	32.278	52.12	56.5	499.9	0	1289	96.3	2.71	0.729	0.3	111105
clear-cut strip	25	13	13:00-14:00	Medium	c-25-2	1.38407	0.0697088	1.37167	343	1.61	6	1	2.84	32.76	32.55	32.76	381.15	378.99	32.628	34.212	63.35	66.42	500	0	531	96.79	288	21.8	1	111105
clear-cut strip	25	13	13:00-14:00	Medium	c-25-2	1.77941	0.0895835	1.24516	343	1.61	6	1	2.84	32.76	32.55	32.76	381.15	378.99	32.628	34.212	63.35	66.42	500	0	531	96.79	288	21.8	1	111105
clear-cut strip	25	13	13:00-14:00	Medium	c-25-2	1.24498	0.100295	1.52119	343	1.61	6	1	2.84	32.77	32.55	32.76	381.11	378.97	32.633	34.214	63.35	66.42	500	0	531	96.79	288	21.8	1	111105
clear-cut strip	25	13	13:00-14:00	Medium	c-25-2	1.28578	0.0965651	1.4487	342	1.61	6	1	2.84	32.77	32.55	32.76	381.07	378.89	32.631	34.218	63.34	66.42	500.1	0	531	96.79	288	21.8	1	111105
clear-cut strip	25	13	13:00-14:00	Medium	c-25-2	0.770142	0.078049	1.60873	343	1.61	6	1	2.84	32.77	32.55	32.77	380.97	378.82	32.631	34.222	63.35	66.43	500	0	529	96.79	288	21.8	1	111105
clear-cut strip	25	9	13:00-14:00	Small	c-25-3	3.07183	0.103681	2.2494	278	2.56	6	1	2.84	34.69	35.19	34.6	362.61	357.35	29.881	32.658	51.84	56.66	499.9	0	1512	96.3	2.71	0.729	0.7	111105
clear-cut strip	25	9	13:00-14:00	Small	c-25-3	3.52201	0.075947	2.3906	277	2.56	6	1	2.84	34.69	35.2	34.61	362.59	357.22	29.875	32.674	51.82	56.68	499.9	0	1514	96.3	2.71	0.729	0.7	111105
clear-cut strip	25	9	13:00-14:00	Small	c-25-3	4.38122	0.0783778	2.6948	277	2.57	6	1	2.84	34.69	35.2	34.61	362.58	357.25	29.87	32.674	51.81	56.67	499.9	0	1516	96.3	2.71	0.729	0.7	111105
clear-cut strip	25	9	13:00-14:00	Small	c-25-3	3.71864	0.0824383	2.21069	277	2.57	6	1	2.84	34.69	35.21	34.61	362.54	357.15	29.868	32.681	51.8	56.68	499.9	0	1518	96.3	2.71	0.729	0.7	111105
clear-cut strip	25	9	13:00-14:00	Small	c-25-3	2.87367	0.0855641	2.45129	276	2.57	6	1	2.84	34.69	35.21	34.61	362.54	357.09	29.866	32.688	51.79	56.69	499.9	0	1519	96.3	2.71	0.729	0.7	111105
clear-cut strip	25	9	13:00-14:00	Small	c-25-3	2.94852	0.0857147	1.46027	337	1.59	6	1	2.84	32.69	32.54	32.71	383.46	380.77	32.851	34.432	64.03	67.11	499.8	0	539	96.79	288	21.8	0.7	111105
clear-cut strip	25	9	13:00-14:00	Small	c-25-3	1.78259	0.0713855	1.31293	336	1.59	6	1	2.84	32.69	32.54	32.71	383.43	380.71	32.85	34.422	64.02	67.09	499.8	0	539	96.79	288	21.8	0.7	111105
clear-cut strip	25	9	13:00-14:00	Small	c-25-3	2.1607	0.0740284	1.25323	335	1.59	6	1	2.84	32.69	32.54	32.71	383.42	380.68	32.846	34.421	64.02	67.09	499.8	0	539	96.79	288	21.8	0.7	111105
clear-cut strip	25	9	13:00-14:00	Small	c-25-3	1.54692	0.0711552	1.23316	337	1.59	6	1	2.84	32.7	32.54	32.71	383.4	380.75	32.844	34.41	64.01	67.06	499.8	0	539	96.79	288	21.8	0.7	111105
clear-cut strip	25	9	13:00-14:00	Small	c-25-3	1.72991	0.0983613	1.13933	338	1.59	6	1	2.84	32.7	32.54	32.71	383.37	380.83	32.841	34.4	64	67.04	499.8	0	539	96.79	288	21.8	0.7	111105
clear-cut strip	25	27	14:30-15:30	Large	c-25-1	8.44699	0.0722417	2.44954	2.14	2.23	6	1	2.84	34.02	34.33	34.02	399.86	390.01	30.837	33.32	55.52	59.99	499.9	0	890	96.29	47.1	-0.0292	0.7	111105
clear-cut strip	25	27	14:30-15:30	Large	c-25-1	6.84205	0.0904367	2.44826	2.14	2.23	6	1	2.84	34.02	34.32	34.02	399.85	390.03	30.835	33.321	55.51	59.98	499.9	0	888	96.29	47.1	-0.0292	0.7	111105
clear-cut strip	25	27	14:30-15:30	Large	c-25-1	7.268	0.100484	2.46118	2.14	2.23	6	1	2.84	34.02	34.32	34.02	399.88	390.07	30.835	33.323	55.5	59.98	499.9	0	887	96.29	47.1	-0.0292	0.7	111105
clear-cut strip	25	27	14:30-15:30	Large	c-25-1	6.7988	0.0881166	2.47092	2.15	2.23	6	1	2.84	34.02	34.31	34.02	399.9	390.17	30.834	33.324	55.5	59.98	499.9	0	886	96.29	47.1	-0.0292	0.7	111105
clear-cut strip	25	27	14:30-15:30	Large	c-25-1	7.78441	0.10841	2.50117	2.16	2.22	6	1	2.84	34.02	34.29	34.02	399.87	390.27	30.835	33.335	55.49	59.99	500	0	882	96.29	47.1	-0.0292	0.7	111105
clear-cut strip	25	27	14:30-15:30	Large	c-25-1	1.24815	0.0590424	3.11117	0.822	1.31	6	1	2.84	30.8	30.49	30.82	383.68	380.58	30.775	31.731	66.77	68.84	499.9	0	254	96.79	286	21	0.7	111105
clear-cut strip	25	27	14:30-15:30	Large	c-25-1	1.46222	0.0482772	3.11018	0.828	1.31	6	1	2.84	30.81	30.49	30.82	383.67	380.56	30.775	31.737	66.76	68.85	499.9	0	254	96.79	286	21	0.7	111105
clear-cut strip	25	27	14:30-15:30	Large	c-25-1	1.74488	0.0453662	3.10913	0.83	1.31	6	1	2.84	30.81	30.49	30.82	383.72	380.59	30.775	31.74	66.76	68.86	499.9	0	254	96.79	286	21	0.7	111105
clear-cut strip	25	27	14:30-15:30	Large	c-25-1	2.02971	0.0555175	3.11916	0.833	1.31	6	1	2.84	30.81	30.5	30.82	383.69	380.63	30.771	31.739	66.75	68.85	499.9	0	254	96.79	286	21	0.7	111105
clear-cut strip	25	27	14:30-15:30	Large	c-25-1	2.45219	0.0562252	3.14901	0.839	1.31	6	1	2.84	30.81	30.51	30.82	383.71	380.71	30.766	31.741	66.73	68.85	499.9	0	253	96.79	286	21	0.7	111105
clear-cut strip	25	13	14:30-15:30	Medium	c-25-2	6.04997	0.18648	3.23927	3.56	1.92	6	1	2.84	34.18	33.84	34.16	396.92	388.49	30.871	34.99	55.08	62.43	500	0	806	96.29	47.1	-0.0292	0.7	111105
clear-cut strip	25	13	14:30-15:30	Medium	c-25-2	6.59264	0.167981	3.23017	3.56	1.93	6	1	2.84	34.18	33.84	34.16	396.88	388.36	30.869	34.99	55.07	62.43	500	0	806	96.29	47.1	-0.0292	0.7	111105
clear-cut strip	25	13	14:30-15:30	Medium	c-25-2	5.51924	0.196961	3.22908	3.55	1.93	6	1	2.84	34.18	33.85	34.16	396.81	388.35	30.865	34.976	55.06	62.4	500	0	805	96.29	47.1	-0.0292	0.7	111105
clear-cut strip	25	13	14:30-15:30	Medium	c-25-2	6.16928	0.178005	3.22927	3.55	1.93	6	1	2.84	34.18	33.85	34.16	396.75	388.28	30.862	34.975	55.05	62.39	500	0	803	96.29	47.1	-0.0292	0.7	111105
clear-cut strip	25	13	14:30-15:30	Medium	c-25-2	5.5594	0.168932	3.23045	3.55	1.93	6	1	2.84	34.18	33.86	34.16	396.7	388.19	30.861	34.974	55.05	62.38	500	0	801	96.29	47.1	-0.0292	0.7	111105
clear-cut strip	25	13	14:30-15:30	Medium	c-25-2	0.572241	0.0560242	3.51095	0.952	1.36	6	1	2.84	30.75	30.77	30.78	383.6	382.07	30.812	31.918	67.05	69.45	499.8	0	277	96.78	286	21	0.7	111105
clear-cut strip	25	13	14:30-15:30	Medium	c-25-2	0.558752	0.057517	3.51262	0.952	1.36	6	1	2.84	30.75	30.77	30.78	383.6	382.07	30.812	31.918	67.05	69.45	499.8	0	277	96.78	286	21	0.7	111105
clear-cut strip	25	13	14:30-15:30	Medium	c-25-2	0.0904597	0.0756587	3.52086	0.953	1.36	6	1	2.84	30.75	30.76	30.78	383.56	382.07	30.81	31.917	67.04	69.45	499.8	0	277	96.78	286	21	0.7	111105
clear-cut strip	25	13	14:30-15:30	Medium	c-25-2	1.12193	0.0903645	3.52855	0.957	1.36	6	1	2.84	30.75	30.75	30.78	383.52	382.09	30.811	31.923	67.04	69.46	499.9	0	277	96.78	286	21	0.7	111105
clear-cut strip	25	13	14:30-15:30	Medium	c-25-2	0.50808	0.0753296	3.52098	0.958	1.35	6	1	2.84	30.76	30.73	30.78	383.56	382.06	30.812	31.926	67.03	69.46	499.9	0	276	96.78	286	21	0.7	111105
clear-cut strip	25	9	14:30-15:30	Small	c-25-3	1.47532	0.0649649	3.10115	0.76	1.23	6	1	2.84	30.69	30.27	30.73	384.04	380.94	31.167	32.05	68.05	69.98	499.9	0	328	96.78	286	21	0.7	111105
clear-cut strip	25	9	14:30-15:30	Small	c-25-3	3.11437	0.0616514	3.13078	0.764	1.23	6	1	2.84	30.69	30.27	30.73	384.02	381.02	31.167	32.054	68.05	69.99	499.9	0	328	96.78	286	21	1	111105
clear-cut strip	25	9	14:30-15:30	Small	c-25-3	2.23303	0.0723241	3.14209	0.763	1.23	6	1	2.84	30.69	30.27	30.73	384.01	381.06	31.165	32.051	68.05	69.98	499.8	0	328	96.78	286	21	1	111105
clear-cut strip	25	9	14:30-15:30	Small	c-25-3	3.27861	0.0396988	3.12114	0.766	1.23	6	1	2.84	30.69	30.27	30.73	384.03	381	31.162	32.052	68.04	69.98	499.8	0	328	96.78	286	21	1	111105
clear-cut strip	25	9	14:30-15:30	Small	c-25-3	1.85884	0.0502655	3.10939	0.763	1.23	6	1	2.84	30.69	30.28	30.73	384.07	381.01	31.16	32.047	68.03	69.97	499.8	0	329	96.78	286	21	1	111105
clear-cut strip	25	9	14:30-15:30	Small	c-25-3	6.63892	0.147362	2.89098	3	2.04	6	1	2.84	34.14	33.97	34.16	391.01	381.36	30.787	34.267	55.07	61.29	499.9	0	782	96.29	47.1	-0.0292	0.3	111105
clear-cut strip	25	9	14:30-15:30	Small	c-25-3	5.74791	0.14153	2.89884	3.01	2.03	6	1	2.84	34.14	33.95	34.16	391	381.41	30.789	34.276	55.07	61.3	499.9	0	736	96.29	47.1	-0.0292	0.3	111105
clear-cut strip	25	9	14:30-15:30	Small	c-25-3	6.30174	0.155306	2.89139	3.01	2.02	6	1	2.84	34.14	33.92	34.16	390.96	381.27	30.797	34.287	55.07	61.31	499.9	0	732	96.29	47.1	-0.0292	0.3	111105
clear-cut strip	25	9	14:30-15:30	Small	c-25-3	7.4894	0.154751	2.88993	3.01	2.02	6	1	2.84	34.14	33.91	34.16	390.93	381.23	30.8	34.288	55.07	61.3	499.9	0	732	96.29	47.1	-0.0292	0.3	111105
clear-cut strip	25	9	14:30-15:30	Small	c-25-3	7.18579	0.157248	2.89679	3.02	2.01	6	1	2.84	34.15	33.92	34.17	390.78	381.16	30.812	34.309	55.07	61.32	499.9	0	826	96.29	47.1	-0.0292	0.7	111105
clear-cut strip	20	14	11:00-12:00	Medium	c-20-2	4.56677	0.0816261	3.37561	247	4.12	6	1	2.84	39	39.34	38.89	369.63	363.1	27.701	31.494	38.01	43.22	499.9	0	1484	96.42	4.12	0.4	1	111105
clear-cut strip	20	14	11:00-12:00	Medium	c-20-2	5.26452	0.0257555	0.771484	158	2.34	6	1	2.84	34.94	34.74	34.87	394.16	388.58	32.339	33.27	55.67	57.27	499.9	0	828	96.9	290	20.4	0.7	111105
clear-cut strip	20	14	11:00-12:00	Medium	c-20-2	4.482	0.0271347	0.712048	158	2.34	6	1	2.84	34.94	34.74	34.87	394.16	388.58	32.339	33.27	55.67	57.27	499.9	0	828	96.9	290	20.4	0.7	111105
clear-cut strip	20	14	11:00-12:00	Medium	c-20-2	4.73775	0.0255509	0.654961	158	2.34	6	1	2.84	34.94	34.74	34.87	394.2	388.63	32.338	33.263	55.66	57.25	499.9	0	829	96.9	290	20.4	0.7	111105
clear-cut strip	20	14	11:00-12:00	Medium	c-20-2	4.21406	0.0278225	0.904983	160	2.34	6	1	2.84	34.94	34.74	34.87	394.24	388.65	32.332	33.268	55.65	57.26	499.9	0	830	96.9	290	20.4	0.7	111105
clear-cut strip	20	14	11:00-12:00	Medium	c-20-2	3.71141	0.0494835	0.690779	159	2.34	6	1	2.84	34.94	34.74	34.88	394.23	388.62	32.334	33.272	55.65	57.27	499.8	0	835	96.9	290	20.4	0.7	111105
clear-cut strip	20	14	11:00-12:00	Medium	c-20-2	4.46246	0.0638746	3.38731	250	4.12	6	1	2.84	39	39.34	38.89	369.65	363.25	27.705	31.499	38.02	43.23	499.9	0	1472	96.42	4.12	0.4	1	111105
clear-cut strip	20	16	11:00-12:00	Small	c-20-3	3.55944	-0.00525474	0.356877	-342	2.77	6	1	2.84	35.03	35.9	34.96	393.88	388.82	32.331	32.645	55.36	55.9	499.9	0	1081	96.9	290	20.4	1	111105
clear-cut strip	20	16	11:00-12:00	Small	c-20-3	3.211	-0.000609786	0.375097	-342	2.77	6	1	2.84	35.03	35.9	34.96	393.88	388.82	32.331	32.645	55.36	55.9	499.9	0	1081	96.9	290	20.4	1	111105
clear-cut strip	20	16	11:00-12:00	Small	c-20-3	3.66706	0.016697	0.565147	-364	2.77	6	1	2.84	35.04	35.9	34.96	393.87	388.86	32.337	32.638	55.37	55.88	499.9	0	1078	96.9	290	20.4	1	111105
clear-cut strip	20	16	11:00-12:00	Small	c-20-3	4.30123	0.0256344	0.23757	-384	2.77	6	1	2.84	35.04	35.9	34.96	393.88	388.88	32.345	32.639	55.38	55.88	500	0	1076	96.9	290	20.4	1	111105
clear-cut strip	20	16	11:00-12:00	Small	c-20-3	4.54496	-0.0124382	0.244503	-384	2.77	6	1	2.84	35.04	35.9	34.97	393.87	388.84	32.349	32.645	55.37	55.88	500.1	0	1071	96.9	290	20.4	1	111105
clear-cut strip	20	16	11:00-12:00	Small	c-20-3	4.83319	0.0743278	3.44927	225	4.26	6	1	2.84	39.26	40.01	39.18	369.61	361.66	28.68	32.719	38.8	44.26	499.9	0	1518	96.42	4.12	0.4	0.7	111105
clear-cut strip	20	16	11:00-12:00	Small	c-20-3	6.42611	0.085805	3.45267	225	4.26	6	1	2.84	39.26	40.01	39.18	369.61	361.66	28.68	32.719	38.8	44.26	499.9	0	1518	96.42	4.12	0.4	0.7	111105
clear-cut strip	20	16	11:00-12:00	Small	c-20-3	4.97166	0.0696743	3.47689	226	4.27	6	1	2.84	39.26	40.02	39.19	369.58	361.68	28.687	32.733	38.81	44.28	499.9	0	1508	96.42	4.12	0.4	0.7	111105
clear-cut strip	20	16	11:00-12:00	Small	c-20-3	5.81778	0.0837041	3.32256	225	4.27	6	1	2.84	39.26	40.03	39.19	369.54	361.6	28.693	32.742	38.82	44.29	499.9	0	1499	96.42	4.12	0.4	0.7	111105
clear-cut strip	20	16	11:00-12:00	Small	c-20-3	5.61001	0.0722762	3.72799	227	4.27	6	1	2.84	39.27	40.05	39.19	369.45	361.59	28.702	32.757	38.83	44.31	499.9	0	1487	96.42	4.12	0.4	0.7	111105
clear-cut strip	20	22	13:00-14:00	Large	c-20-1	3.88712	0.0663416	2.1518	268	2.48	6	1	2.84	33.43	34.56	33.24	366.93	361.12	28.912	31.443	53.83	58.54	499.9	0	1599	96.35	3.78	0.765	0.3	111105
clear-cut strip	20	22	13:00-14:00	Large	c-20-1	4.06731	0.0783646	2.42614	269	2.49	6	1	2.84	33.43	34.57	33.25	366.9	361.15	28.898	31.433	53.79	58.51	499.9	0	1598	96.35	3.78	0.765	0.3	111105
clear-cut strip	20	22	13:00-14:00	Large	c-20-1	3.83669	0.0701893	2.33235	269	2.5	6	1	2.84	33.44	34.59	33.25	366.84	361.14	28.864	31.393	53.71	58.42	499.9	0	1598	96.35	3.78	0.765	0.3	111105
clear-cut strip	20	22	13:00-14:00	Large	c-20-1	4.23744	0.0876214	1.88131	269	2.5	6	1	2.84	33.44	34.6	33.25	366.83	361.17	28.852	31.374	53.68	58.38	499.9	0	1598	96.35	3.78	0.765	0.3	111105
clear-cut strip	20	22	13:00-14:00	Large	c-20-1	3.05843	0.0847957	2.07965	267	2.5	6	1	2.84	33.44	34.6	33.26	366.81	361.05	28.842	31.363	53.66	58.35	499.9	0	1598	96.35	3.78	0.765	0.3	111105
clear-cut strip	20	22	13:00-14:00	Large	c-20-1	4.33392	0.0407277	0.898975	311	2.5	6	1	2.84	35.62	35.4	35.65	388.77	387.2	32.925	33.772	54.54	55.94	499.9	0	550	96.84	290	21.7	0.7	111105
clear-cut strip	20	22	13:00-14:00	Large	c-20-1	3.7521	0.0200614	0.710129	311	2.5	6	1	2.84	35.62	35.4	35.65	388.77	387.2	32.925	33.772	54.54	55.94	499.9	0	550	96.84	290	21.7	0.7	111105
clear-cut strip	20	22	13:00-14:00	Large	c-20-1	3.83634	0.0237338	1.01139	308	2.5	6	1	2.84	35.62	35.4	35.65	388.76	387.11	32.922	33.771	54.53	55.94	499.9	0	547	96.84	290	21.7	0.7	111105
clear-cut strip	20	22	13:00-14:00	Large	c-20-1	1.43375	0.016474	0.634724	307	2.51	6	1	2.84	35.62	35.41	35.65	388.73	387.05	32.919	33.776	54.54	55.96	500	0	547	96.84	290	21.7	0.7	111105
clear-cut strip	20	22	13:00-14:00	Large	c-20-1	1.72536	0.0515452	1.02386	306	2.51	6	1	2.84	35.62	35.41	35.65	388.71	387.01	32.917	33.776	54.54	55.96	500	0	551	96.84	290	21.7	0.7	111105
clear-cut strip	20	14	13:00-14:00	Medium	c-20-2	3.45964	0.0717058	2.10526	250	2.68	6	1	2.84	33.66	34.77	33.49	364.51	358.93	27.863	30.112	51.2	55.34	499.9	0	1251	96.35	3.78	0.765	1	111105
clear-cut strip	20	14	13:00-14:00	Medium	c-20-2	3.02298	0.0460323	1.82119	249	2.68	6	1	2.84	33.67	34.77	33.49	364.53	358.92	27.867	30.11	51.2	55.32	499.9	0	1250	96.35	3.78	0.765	1	111105
clear-cut strip	20	14	13:00-14:00	Medium	c-20-2	4.22337	0.0788121	2.11663	248	2.68	6	1	2.84	33.67	34.78	33.5	364.49	358.9	27.867	30.094	51.19	55.28	499.9	0	1248	96.35	3.78	0.765	1	111105
clear-cut strip	20	14	13:00-14:00	Medium	c-20-2	3.24184	0.050909	1.95991	245	2.68	6	1	2.84	33.67	34.79	33.5	364.5	358.76	27.872	30.101	51.19	55.29	499.9	0	1244	96.35	3.78	0.765	1	111105
clear-cut strip	20	14	13:00-14:00	Medium	c-20-2	4.0242	0.0636696	1.89827	244	2.69	6	1	2.84	33.68	34.8	33.5	364.51	358.77	27.881	30.084	51.2	55.24	499.9	0	1242	96.35	3.78	0.765	1	111105
clear-cut strip	20	14	13:00-14:00	Medium	c-20-2	1.31685	0.0457952	1.10251	317	2.45	6	1	2.84	35.36	35.12	35.39	387.99	385.75	32.118	33.428	53.99	56.19	499.9	0	549	96.84	290	21.7	0.7	111105
clear-cut strip	20	14	13:00-14:00	Medium	c-20-2	0.969906	0.0267347	1.40416	318	2.45	6	1	2.84	35.36	35.12	35.39	387.96	385.73	32.117	33.43	53.99	56.19	499.9	0	549	96.84	290	21.7	0.7	111105
clear-cut strip	20	14	13:00-14:00	Medium	c-20-2	2.54814	0.0448514	1.29508	318	2.45	6	1	2.84	35.36	35.12	35.39	387.95	385.71	32.117	33.435	53.99	56.21	499.9	0	549	96.84	290	21.7	0.7	111105
clear-cut strip	20	14	13:00-14:00	Medium	c-20-2	1.65626	0.0405328	1.21291	318	2.45	6	1	2.84	35.36	35.12	35.39	387.9	385.66	32.115	33.434	53.98	56.2	499.9	0	549	96.84	290	21.7	0.7	111105
clear-cut strip	20	14	13:00-14:00	Medium	c-20-2	2.08298	0.0243971	1.07717	315	2.45	6	1	2.84	35.36	35.11	35.39	387.92	385.6	32.118	33.435	53.99	56.21	499.9	0	549	96.84	290	21.7	0.7	111105
clear-cut strip	20	16	13:00-14:00	Small	c-20-3	4.15861	0.0788623	2.34808	266	2.7	6	1	2.84	34.08	35.01	33.85	363.61	357.73	27.795	30.635	49.91	55.01	499.9	0	1273	96.36	3.78	0.765	0.7	111105
clear-cut strip	20	16	13:00-14:00	Small	c-20-3	4.1694	0.074619	2.34466	267	2.71	6	1	2.84	34.08	35.03	33.86	363.6	357.76	27.803	30.645	49.9	55.01	499.9	0	1275	96.36	3.78	0.765	0.7	111105
clear-cut strip	20	16	13:00-14:00	Small	c-20-3	2.87194	0.0895769	2.54226	264	2.71	6	1	2.84	34.1	35.04	33.87	363.63	357.7	27.815	30.634	49.89	54.95	499.9	0	1276	96.36	3.78	0.765	1	111105
clear-cut strip	20	16	13:00-14:00	Small	c-20-3	5.35367	0.0854806	2.55889	263	2.71	6	1	2.84	34.1	35.03	33.87	363.66	357.67	27.832	30.633	49.9	54.92	499.9	0	1272	96.36	3.78	0.765	1	111105
clear-cut strip	20	16	13:00-14:00	Small	c-20-3	3.47331	0.0878814	2.4271	262	2.7	6	1	2.84	34.13	35.01	33.88	363.71	357.7	27.856	30.631	49.88	54.85	499.9	0	1274	96.36	3.78	0.765	1	111105
clear-cut strip	20	16	13:00-14:00	Small	c-20-3	2.92229	0.0479431	1.29242	306	2.4	6	1	2.84	35.39	35.12	35.4	390	387.14	32.491	33.885	54.51	56.85	499.9	0	485	96.85	290	21.7	0.7	111105
clear-cut strip	20	16	13:00-14:00	Small	c-20-3	2.21166	0.045915	1.34031	306	2.4	6	1	2.84	35.39	35.12	35.4	390	387.14	32.491	33.885	54.51	56.85	499.9	0	485	96.85	290	21.7	0.7	111105
clear-cut strip	20	16	13:00-14:00	Small	c-20-3	2.59131	0.0567977	1.24177	306	2.4	6	1	2.84	35.39	35.12	35.4	390.01	387.12	32.508	33.901	54.54	56.88	499.9	0	486	96.85	290	21.7	0.7	111105
clear-cut strip	20	16	13:00-14:00	Small	c-20-3	1.66187	0.0366666	0.875101	306	2.4	6	1	2.84	35.39	35.12	35.4	389.97	387.11	32.513	33.903	54.55	56.88	499.9	0	486	96.85	290	21.7	1	111105
clear-cut strip	20	16	13:00-14:00	Small	c-20-3	2.45512	0.0633129	1.36814	306	2.4	6	1	2.84	35.39	35.11	35.4	389.98	387.1	32.521	33.909	54.56	56.89	499.9	0	487	96.85	290	21.7	1	111105
clear-cut strip	20	22	14:30-15:30	Large	c-20-1	1.47951	0.15347	2.02325	348	1.4	6	1	2.84	31.99	30.97	31.98	379.62	376.29	29.521	32.207	59.58	65.01	499.9	0	260	96.32	47.1	-0.0292	0.7	111105
clear-cut strip	20	22	14:30-15:30	Large	c-20-1	1.62009	0.148384	2.25486	348	1.4	6	1	2.84	31.99	30.97	31.98	379.62	376.29	29.521	32.207	59.58	65.01	499.9	0	260	96.32	47.1	-0.0292	0.7	111105
clear-cut strip	20	22	14:30-15:30	Large	c-20-1	3.09056	0.176202	2.1014	348	1.4	6	1	2.84	31.99	30.98	31.98	379.6	376.31	29.521	32.21	59.6	65.03	499.9	0	261	96.32	47.1	-0.0292	0.7	111105
clear-cut strip	20	22	14:30-15:30	Large	c-20-1	1.81695	0.150393	2.15874	348	1.4	6	1	2.84	31.99	30.98	31.98	379.57	376.27	29.521	32.209	59.59	65.02	499.9	0	260	96.32	47.1	-0.0292	0.7	111105
clear-cut strip	20	22	14:30-15:30	Large	c-20-1	1.38925	0.167675	2.36619	348	1.4	6	1	2.84	31.99	30.98	31.98	379.56	376.24	29.518	32.199	59.57	64.98	499.9	0	258	96.32	47.1	-0.0292	0.7	111105
clear-cut strip	20	22	14:30-15:30	Large	c-20-1	0.237954	0.0496193	0.879148	368	1.49	6	1	2.84	31.68	31.38	31.71	385.57	384.92	31.352	32.263	64.7	66.58	499.9	0	229	96.78	287	21.4	0.7	111105
clear-cut strip	20	22	14:30-15:30	Large	c-20-1	0.173109	0.0542447	0.833422	370	1.49	6	1	2.84	31.68	31.38	31.71	385.56	384.99	31.353	32.265	64.69	66.57	499.9	0	227	96.78	287	21.4	0.7	111105
clear-cut strip	20	22	14:30-15:30	Large	c-20-1	0.314254	0.0455812	0.47954	368	1.49	6	1	2.84	31.69	31.38	31.71	385.54	384.9	31.352	32.268	64.68	66.57	499.9	0	227	96.78	287	21.4	0.7	111105
clear-cut strip	20	22	14:30-15:30	Large	c-20-1	0.729687	0.0482873	0.514414	368	1.49	6	1	2.84	31.69	31.38	31.71	385.55	384.9	31.354	32.269	64.68	66.57	499.9	0	226	96.78	287	21.4	0.7	111105
clear-cut strip	20	22	14:30-15:30	Large	c-20-1	3.64583	0.0730131	0.801354	368	1.49	6	1	2.84	31.69	31.38	31.71	385.48	384.84	31.354	32.273	64.67	66.57	499.9	0	224	96.78	287	21.4	0.7	111105
clear-cut strip	20	14	14:30-15:30	Medium	c-20-2	1.44819	0.124286	2.00129	333	1.41	6	1	2.84	31.91	31	31.92	382.38	378.17	30.005	32.189	60.83	65.26	499.9	0	269	96.33	47.1	-0.0292	1	111105
clear-cut strip	20	14	14:30-15:30	Medium	c-20-2	2.97452	0.122378	1.6532	334	1.41	6	1	2.84	31.91	30.99	31.92	382.4	378.2	30.001	32.196	60.83	65.28	499.9	0	267	96.33	47.1	-0.0292	1	111105
clear-cut strip	20	14	14:30-15:30	Medium	c-20-2	2.36435	0.146549	2.04049	333	1.41	6	1	2.84	31.91	30.99	31.92	382.44	378.14	29.996	32.189	60.82	65.26	499.9	0	265	96.33	47.1	-0.0292	1	111105
clear-cut strip	20	14	14:30-15:30	Medium	c-20-2	2.51684	0.148033	1.6755	332	1.4	6	1	2.84	31.91	30.98	31.92	382.49	378.13	29.99	32.188	60.81	65.27	499.9	0	263	96.33	47.1	-0.0292	1	111105
clear-cut strip	20	14	14:30-15:30	Medium	c-20-2	1.98151	0.114856	1.60732	332	1.4	6	1	2.84	31.92	30.97	31.92	382.55	378.12	29.981	32.184	60.77	65.23	499.9	0	262	96.33	47.1	-0.0292	0.7	111105
clear-cut strip	20	14	14:30-15:30	Medium	c-20-2	0.786378	0.0482049	0.728199	340	1.52	6	1	2.84	31.75	31.6	31.78	383.57	381.84	31.472	32.514	64.68	66.83	499.9	0	341	96.78	287	21.4	0.7	111105
clear-cut strip	20	14	14:30-15:30	Medium	c-20-2	1.44007	0.0708972	0.801615	343	1.52	6	1	2.84	31.75	31.6	31.78	383.56	381.92	31.474	32.509	64.69	66.81	499.9	0	341	96.78	287	21.4	0.7	111105
clear-cut strip	20	14	14:30-15:30	Medium	c-20-2	0.178099	0.044189	0.85572	342	1.52	6	1	2.84	31.76	31.59	31.78	383.52	381.88	31.483	32.506	64.7	66.8	499.9	0	341	96.78	287	21.4	0.7	111105
clear-cut strip	20	14	14:30-15:30	Medium	c-20-2	1.33129	0.0710018	0.936431	342	1.52	6	1	2.84	31.76	31.59	31.78	383.5	381.86	31.49	32.508	64.71	66.8	499.9	0	341	96.78	287	21.4	0.7	111105
clear-cut strip	20	14	14:30-15:30	Medium	c-20-2	0.455375	0.057889	0.818043	342	1.52	6	1	2.84	31.76	31.59	31.78	383.51	381.89	31.491	32.505	64.71	66.79	499.8	0	341	96.78	287	21.4	0.7	111105
clear-cut strip	20	16	14:30-15:30	Small	c-20-3	2.0348	0.075127	0.975049	352	1.45	6	1	2.84	31.83	31.44	31.82	385.01	383.55	31.707	32.817	64.89	67.16	499.9	0	258	96.78	287	21.4	0.7	111105
clear-cut strip	20	16	14:30-15:30	Small	c-20-3	1.17781	0.061351	1.05038	352	1.45	6	1	2.84	31.83	31.44	31.82	385.01	383.55	31.707	32.817	64.89	67.16	499.9	0	258	96.78	287	21.4	0.7	111105
clear-cut strip	20	16	14:30-15:30	Small	c-20-3	0.775141	0.0764106	0.815041	351	1.45	6	1	2.84	31.83	31.43	31.82	385.03	383.5	31.709	32.814	64.88	67.14	499.9	0	258	96.78	287	21.4	0.7	111105
clear-cut strip	20	16	14:30-15:30	Small	c-20-3	1.94094	0.0530619	0.944076	350	1.45	6	1	2.84	31.84	31.42	31.82	385.03	383.48	31.711	32.818	64.87	67.13	499.9	0	258	96.78	287	21.4	0.7	111105
clear-cut strip	20	16	14:30-15:30	Small	c-20-3	1.1247	0.0745396	1.04579	351	1.45	6	1	2.84	31.85	31.42	31.83	384.99	383.49	31.712	32.81	64.84	67.08	499.8	0	257	96.78	287	21.4	0.7	111105
clear-cut strip	20	16	14:30-15:30	Small	c-20-3	3.10084	0.120021	2.26889	328	1.55	6	1	2.84	31.97	31.54	31.98	379.95	375.72	29.92	32.182	60.47	65.04	499.9	0	365	96.33	47.1	-0.0292	0.7	111105
clear-cut strip	20	16	14:30-15:30	Small	c-20-3	2.46393	0.110455	1.87144	329	1.55	6	1	2.84	31.97	31.54	31.98	379.99	375.83	29.93	32.197	60.48	65.06	499.9	0	365	96.33	47.1	-0.0292	0.7	111105
clear-cut strip	20	16	14:30-15:30	Small	c-20-3	2.89181	0.126061	1.9923	330	1.55	6	1	2.84	31.97	31.54	31.98	379.98	375.87	29.938	32.216	60.51	65.11	499.9	0	364	96.33	47.1	-0.0292	0.7	111105
clear-cut strip	20	16	14:30-15:30	Small	c-20-3	3.20405	0.123061	2.17163	329	1.55	6	1	2.84	31.97	31.54	31.98	380	375.83	29.946	32.227	60.51	65.12	499.9	0	363	96.33	47.1	-0.0292	0.7	111105
clear-cut strip	20	16	14:30-15:30	Small	c-20-3	1.63274	0.125671	1.90005	329	1.55	6	1	2.84	31.98	31.54	31.98	380.04	375.82	29.948	32.227	60.5	65.1	499.9	0	363	96.33	47.1	-0.0292	0.7	111105
clear-cut strip	15	21	9:30-10:30	Large	c-15-1	3.15839	0.072089	0.900777	340	1.42	6	1	2.84	31.61	31.18	31.55	423.53	419.11	31.07	32.372	64.46	67.16	499.9	0	319	96.9	296	21.1	0.7	111105
clear-cut strip	15	21	9:30-10:30	Large	c-15-1	2.75997	0.0607494	1.02183	339	1.42	6	1	2.84	31.63	31.18	31.56	423.47	419.03	31.07	32.367	64.38	67.07	499.9	0	318	96.9	296	21.1	0.7	111105
clear-cut strip	15	21	9:30-10:30	Large	c-15-1	2.4902	0.0689971	1.27864	341	1.42	6	1	2.84	31.64	31.19	31.57	423.34	419.02	31.075	32.366	64.35	67.02	499.9	0	315	96.9	296	21.1	0.7	111105
clear-cut strip	15	21	9:30-10:30	Large	c-15-1	3.30361	0.0883133	0.913864	341	1.42	6	1	2.84	31.64	31.19	31.57	423.34	419.02	31.075	32.366	64.35	67.02	499.9	0	315	96.9	296	21.1	0.7	111105
clear-cut strip	15	21	9:30-10:30	Large	c-15-1	2.63377	0.0855066	1.19174	344	1.42	6	1	2.84	31.64	31.19	31.57	423.15	419	31.077	32.369	64.35	67.03	499.9	0	313	96.9	296	21.1	0.7	111105
clear-cut strip	15	18	9:30-10:30	Medium	c-15-2	2.24953	0.0845217	1.22966	345	1.52	6	1	2.84	32.09	31.68	32.07	403.35	400.29	31.28	32.671	63.14	65.95	499.9	0	433	96.89	291	21.2	1	111105
clear-cut strip	15	18	9:30-10:30	Medium	c-15-2	1.71746	0.0687472	1.23838	346	1.52	6	1	2.84	32.1	31.69	32.07	403.39	400.33	31.281	32.676	63.13	65.94	499.9	0	433	96.89	291	21.2	1	111105
clear-cut strip	15	18	9:30-10:30	Medium	c-15-2	1.66678	0.0638808	1.35929	346	1.52	6	1	2.84	32.1	31.69	32.07	403.39	400.33	31.281	32.676	63.13	65.94	499.9	0	433	96.89	291	21.2	1	111105
clear-cut strip	15	18	9:30-10:30	Medium	c-15-2	2.33746	0.0860363	1.15096	343	1.53	6	1	2.84	32.11	31.69	32.08	403.48	400.3	31.287	32.675	63.1	65.9	499.9	0	434	96.89	291	21.2	1	111105
clear-cut strip	15	18	9:30-10:30	Medium	c-15-2	2.30926	0.0553885	0.936584	343	1.52	6	1	2.84	32.12	31.68	32.08	403.54	400.35	31.294	32.681	63.08	65.87	499.9	0	435	96.89	291	21.2	1	111105
clear-cut strip	15	16	9:30-10:30	Small	c-15-3	3.36975	0.00972093	-0.0520133	-620	1.45	6	1	2.84	31.39	30.96	31.36	423	411.64	31.218	31.481	65.59	66.14	499.9	0	299	96.89	290	20.2	0.7	111105
clear-cut strip	15	16	9:30-10:30	Small	c-15-3	2.73294	0.0291544	0.279743	-675	1.45	6	1	2.84	31.39	30.95	31.36	423.1	411.58	31.224	31.476	65.6	66.13	499.9	0	302	96.89	290	20.2	0.7	111105
clear-cut strip	15	16	9:30-10:30	Small	c-15-3	2.60786	-0.00502203	-0.079913	-751	1.45	6	1	2.84	31.39	30.94	31.36	423.25	411.62	31.229	31.467	65.6	66.1	499.9	0	306	96.89	290	20.2	0.7	111105
clear-cut strip	15	16	9:30-10:30	Small	c-15-3	3.67514	0.00799347	0.277002	-751	1.45	6	1	2.84	31.39	30.94	31.36	423.25	411.62	31.229	31.467	65.6	66.1	499.9	0	306	96.89	290	20.2	0.7	111105
clear-cut strip	15	16	9:30-10:30	Small	c-15-3	3.06759	-0.00849644	0.303629	-796	1.44	6	1	2.84	31.38	30.93	31.36	423.58	411.67	31.238	31.472	65.64	66.13	499.9	0	307	96.89	290	20.2	1	111105
clear-cut strip	15	21	11:00-12:00	Large	c-15-1	4.24884	0.0711448	3.92659	238	4.39	6	1	2.84	40.49	40.63	40.41	363.75	356.47	29.612	34.009	37.51	43.08	499.9	0	1175	96.39	2.44	0.458	0.7	111105
clear-cut strip	15	21	11:00-12:00	Large	c-15-1	4.86126	0.0888907	3.78166	238	4.39	6	1	2.84	40.49	40.64	40.41	363.73	356.47	29.609	34.005	37.5	43.07	499.9	0	1174	96.39	2.44	0.458	0.7	111105
clear-cut strip	15	21	11:00-12:00	Large	c-15-1	3.81783	0.0861361	3.90167	239	4.4	6	1	2.84	40.49	40.65	40.41	363.73	356.49	29.603	34	37.49	43.06	499.9	0	1175	96.39	2.44	0.458	0.7	111105
clear-cut strip	15	21	11:00-12:00	Large	c-15-1	4.65535	0.0822228	3.80628	237	4.4	6	1	2.84	40.49	40.65	40.41	363.74	356.43	29.598	34.003	37.48	43.06	499.9	0	1177	96.39	2.44	0.458	0.7	111105
clear-cut strip	15	21	11:00-12:00	Large	c-15-1	4.26208	0.0741387	3.83738	234	4.4	6	1	2.84	40.49	40.66	40.41	363.83	356.27	29.578	34.012	37.47	43.09	499.9	0	1189	96.39	2.44	0.458	0.7	111105
clear-cut strip	15	21	11:00-12:00	Large	c-15-1	7.23609	0.0225574	0.0196206	-796	2.47	6	1	2.84	34.8	35.12	34.77	405.32	397.23	32.886	33.16	57.02	57.5	500	0	995	96.87	290	20.4	0.7	111105
clear-cut strip	15	21	11:00-12:00	Large	c-15-1	7.02459	0.0130116	0.419515	-796	2.47	6	1	2.84	34.8	35.12	34.77	405.32	397.23	32.886	33.16	57.02	57.5	500	0	995	96.87	290	20.4	0.7	111105
clear-cut strip	15	21	11:00-12:00	Large	c-15-1	7.15375	-0.0112161	0.395093	-849	2.48	6	1	2.84	34.8	35.13	34.77	405.28	397.23	32.893	33.155	57.03	57.49	500	0	994	96.87	290	20.4	0.7	111105
clear-cut strip	15	21	11:00-12:00	Large	c-15-1	6.82293	0.0153754	0.283065	-902	2.48	6	1	2.84	34.8	35.13	34.77	405.29	397.21	32.896	33.148	57.03	57.47	500	0	993	96.87	290	20.4	0.7	111105
clear-cut strip	15	21	11:00-12:00	Large	c-15-1	7.7091	0.00777551	-0.0257649	-1070	2.48	6	1	2.84	34.81	35.13	34.77	405.38	397.19	32.903	33.13	57.03	57.43	500	0	994	96.87	290	20.4	0.7	111105
clear-cut strip	15	18	11:00-12:00	Medium	c-15-2	4.78294	0.099512	4.13493	232	4.32	6	1	2.84	40.13	40.53	39.96	368.52	359.82	29.564	34.34	38.17	44.33	499.9	0	1619	96.39	2.44	0.458	0.7	111105
clear-cut strip	15	18	11:00-12:00	Medium	c-15-2	4.84172	0.103874	4.04441	232	4.31	6	1	2.84	40.13	40.52	39.97	368.45	359.81	29.575	34.342	38.18	44.33	499.9	0	1604	96.39	2.44	0.458	0.7	111105
clear-cut strip	15	18	11:00-12:00	Medium	c-15-2	5.41809	0.104803	4.25666	234	4.3	6	1	2.84	40.13	40.5	39.96	368.31	359.78	29.588	34.355	38.21	44.36	499.9	0	1576	96.39	2.44	0.458	0.7	111105
clear-cut strip	15	18	11:00-12:00	Medium	c-15-2	4.71605	0.0954721	3.89674	233	4.3	6	1	2.84	40.12	40.49	39.96	368.17	359.54	29.606	34.382	38.24	44.41	499.9	0	1571	96.39	2.44	0.458	0.3	111105
clear-cut strip	15	18	11:00-12:00	Medium	c-15-2	4.98174	0.0755709	4.26802	233	4.29	6	1	2.84	40.12	40.49	39.96	368.13	359.5	29.612	34.392	38.25	44.42	499.9	0	1579	96.39	2.44	0.458	0.3	111105
clear-cut strip	15	18	11:00-12:00	Medium	c-15-2	1.04109	0.088595	1.92055	341	2.22	6	1	2.84	35.15	34.94	35.06	393.7	390.64	32.994	35.207	56.11	59.87	499.9	0	825	96.87	293	22	0.7	111105
clear-cut strip	15	18	11:00-12:00	Medium	c-15-2	1.28237	0.065905	1.80609	341	2.22	6	1	2.84	35.15	34.94	35.06	393.7	390.64	32.994	35.207	56.11	59.87	499.9	0	825	96.87	293	22	0.7	111105
clear-cut strip	15	18	11:00-12:00	Medium	c-15-2	1.2482	0.0753759	2.09865	340	2.22	6	1	2.84	35.15	34.94	35.06	393.66	390.55	32.988	35.21	56.11	59.89	499.9	0	825	96.87	293	22	0.7	111105
clear-cut strip	15	18	11:00-12:00	Medium	c-15-2	2.00771	0.0859636	1.79219	339	2.22	6	1	2.84	35.15	34.94	35.06	393.59	390.44	32.982	35.209	56.09	59.88	499.9	0	811	96.87	293	22	0.7	111105
clear-cut strip	15	18	11:00-12:00	Medium	c-15-2	1.62909	0.0812597	1.73832	340	2.22	6	1	2.84	35.15	34.93	35.07	393.5	390.4	32.976	35.208	56.08	59.87	499.9	0	799	96.87	293	22	0.7	111105
clear-cut strip	15	16	11:00-12:00	Small	c-15-3	1.52267	0.0891061	1.93598	341	2.21	6	1	2.84	35.14	34.79	35.11	392	388.9	32.45	34.79	55.23	59.21	499.9	0	562	96.87	293	22	0.7	111105
clear-cut strip	15	16	11:00-12:00	Small	c-15-3	1.34218	0.0909568	1.74315	340	2.21	6	1	2.84	35.13	34.79	35.11	392.03	388.89	32.453	34.792	55.24	59.22	499.9	0	562	96.87	293	22	0.7	111105
clear-cut strip	15	16	11:00-12:00	Small	c-15-3	1.63396	0.0765761	1.8476	340	2.21	6	1	2.84	35.14	34.79	35.11	392.06	388.89	32.454	34.793	55.23	59.21	499.9	0	563	96.87	293	22	0.7	111105
clear-cut strip	15	16	11:00-12:00	Small	c-15-3	1.83229	0.082862	2.03882	339	2.21	6	1	2.84	35.14	34.8	35.11	392.07	388.84	32.455	34.792	55.22	59.2	499.9	0	563	96.87	293	22	0.7	111105
clear-cut strip	15	16	11:00-12:00	Small	c-15-3	2.68266	0.0787857	1.71659	338	2.21	6	1	2.84	35.15	34.8	35.11	392.13	388.84	32.457	34.805	55.21	59.21	499.9	0	564	96.87	293	22	0.7	111105
clear-cut strip	15	16	11:00-12:00	Small	c-15-3	6.01185	0.0755978	3.32026	241	4.03	6	1	2.84	39.66	39.53	39.56	369.2	362.03	29.353	33.254	38.86	44.02	499.9	0	1424	96.39	2.44	0.458	0.7	111105
clear-cut strip	15	16	11:00-12:00	Small	c-15-3	4.79882	0.081196	3.08211	241	4.02	6	1	2.84	39.67	39.53	39.56	369.17	361.97	29.347	33.265	38.84	44.02	499.9	0	1422	96.39	2.44	0.458	0.7	111105
clear-cut strip	15	16	11:00-12:00	Small	c-15-3	5.15051	0.0813801	3.38458	242	4.02	6	1	2.84	39.67	39.53	39.56	369.15	362	29.341	33.272	38.82	44.02	499.9	0	1420	96.39	2.44	0.458	0.7	111105
clear-cut strip	15	16	11:00-12:00	Small	c-15-3	4.19206	0.0611841	3.67277	242	4.02	6	1	2.84	39.67	39.53	39.56	369.16	361.96	29.333	33.275	38.81	44.02	499.9	0	1420	96.39	2.44	0.458	0.7	111105
clear-cut strip	15	16	11:00-12:00	Small	c-15-3	5.23511	0.0733638	3.59708	242	4.02	6	1	2.84	39.68	39.53	39.57	369.13	361.95	29.317	33.258	38.78	43.99	499.9	0	1420	96.39	2.44	0.458	0.7	111105
clear-cut strip	15	21	13:00-14:00	Large	c-15-1	3.92236	0.0795241	2.2338	282	2.85	6	1	2.84	34.83	35.77	34.7	367.21	362.62	28.957	31.602	49.85	54.4	499.9	0	1572	96.32	3.78	0.765	0.7	111105
clear-cut strip	15	21	13:00-14:00	Large	c-15-1	3.90484	0.0777247	2.48841	278	2.84	6	1	2.84	34.84	35.75	34.71	367.04	362.22	28.949	31.629	49.81	54.43	499.9	0	1572	96.32	3.78	0.765	0.7	111105
clear-cut strip	15	21	13:00-14:00	Large	c-15-1	2.90011	0.0649779	2.5218	278	2.84	6	1	2.84	34.84	35.75	34.71	366.94	362.09	28.946	31.636	49.8	54.43	499.9	0	1574	96.32	3.78	0.765	0.7	111105
clear-cut strip	15	21	13:00-14:00	Large	c-15-1	3.97882	0.0774748	2.04559	276	2.84	6	1	2.84	34.84	35.76	34.72	366.86	361.85	28.942	31.654	49.78	54.44	499.9	0	1576	96.32	3.78	0.765	0.7	111105
clear-cut strip	15	21	13:00-14:00	Large	c-15-1	3.75918	0.0713223	2.28865	275	2.85	6	1	2.84	34.85	35.79	34.73	366.65	361.66	28.929	31.638	49.73	54.39	499.9	0	1580	96.32	3.78	0.765	0.7	111105
clear-cut strip	15	21	13:00-14:00	Large	c-15-1	0.20135	0.0438346	1.16604	340	2.13	6	1	2.84	35.02	34.35	35.05	388.28	386.45	32.918	34.295	56.37	58.73	499.9	0	491	96.83	290	21.7	0.7	111105
clear-cut strip	15	21	13:00-14:00	Large	c-15-1	0.948993	0.0640079	1.33258	339	2.13	6	1	2.84	35.02	34.35	35.05	388.25	386.38	32.917	34.299	56.37	58.74	499.9	0	490	96.83	290	21.7	0.7	111105
clear-cut strip	15	21	13:00-14:00	Large	c-15-1	0.969415	0.0682014	1.13514	339	2.13	6	1	2.84	35.02	34.36	35.05	388.13	386.25	32.925	34.301	56.39	58.74	499.9	0	488	96.83	290	21.7	0.7	111105
clear-cut strip	15	21	13:00-14:00	Large	c-15-1	1.25678	0.0648119	1.25403	340	2.13	6	1	2.84	35.02	34.36	35.05	388.01	386.17	32.924	34.298	56.39	58.74	499.9	0	485	96.83	290	21.7	0.7	111105
clear-cut strip	15	21	13:00-14:00	Large	c-15-1	1.14464	0.0686499	1.28224	338	2.13	6	1	2.84	35.02	34.37	35.05	387.97	386.07	32.928	34.305	56.39	58.75	499.9	0	485	96.83	290	21.7	0.7	111105
clear-cut strip	15	18	13:00-14:00	Medium	c-15-2	4.0463	0.0770224	2.31478	261	2.91	6	1	2.84	35.42	36.13	35.24	361.87	356.1	29.362	32.253	48.92	53.74	499.9	0	1451	96.32	3.78	0.765	0.3	111105
clear-cut strip	15	18	13:00-14:00	Medium	c-15-2	3.74425	0.0795908	2.23307	260	2.91	6	1	2.84	35.4	36.14	35.24	361.83	356.01	29.352	32.234	48.97	53.77	499.9	0	1459	96.32	3.78	0.765	0.3	111105
clear-cut strip	15	18	13:00-14:00	Medium	c-15-2	4.10098	0.0997651	2.34023	259	2.91	6	1	2.84	35.38	36.15	35.24	361.75	355.93	29.34	32.217	48.98	53.78	499.9	0	1466	96.32	3.78	0.765	0.3	111105
clear-cut strip	15	18	13:00-14:00	Medium	c-15-2	3.49711	0.0735247	2.47074	260	2.92	6	1	2.84	35.37	36.15	35.24	361.67	355.89	29.328	32.206	48.99	53.79	499.9	0	1472	96.32	3.78	0.765	0.3	111105
clear-cut strip	15	18	13:00-14:00	Medium	c-15-2	3.85907	0.0856021	2.22848	258	2.93	6	1	2.84	35.38	36.18	35.24	361.58	355.73	29.319	32.188	48.96	53.75	499.9	0	1481	96.32	3.78	0.765	0.3	111105
clear-cut strip	15	18	13:00-14:00	Medium	c-15-2	1.44924	0.0349137	1.15663	306	2.23	6	1	2.84	34.9	34.58	34.93	389.13	385.8	32.469	33.994	55.98	58.61	499.9	0	425	96.82	290	21.7	0.7	111105
clear-cut strip	15	18	13:00-14:00	Medium	c-15-2	2.97793	0.0495093	1.27804	306	2.23	6	1	2.84	34.9	34.58	34.93	389.13	385.8	32.469	33.994	55.98	58.61	499.9	0	425	96.82	290	21.7	0.7	111105
clear-cut strip	15	18	13:00-14:00	Medium	c-15-2	2.07449	0.0505878	1.55554	307	2.23	6	1	2.84	34.9	34.58	34.93	389.2	385.91	32.477	33.994	55.99	58.61	499.9	0	424	96.82	290	21.7	0.7	111105
clear-cut strip	15	18	13:00-14:00	Medium	c-15-2	1.44134	0.0518976	1.2011	304	2.23	6	1	2.84	34.9	34.58	34.93	389.41	386.02	32.489	33.995	56.01	58.61	499.9	0	423	96.82	290	21.7	0.7	111105
clear-cut strip	15	18	13:00-14:00	Medium	c-15-2	2.90168	0.0360037	1.55676	304	2.23	6	1	2.84	34.9	34.58	34.93	389.53	386.14	32.501	34.005	56.03	58.62	499.9	0	422	96.82	290	21.7	0.7	111105
clear-cut strip	15	16	13:00-14:00	Small	c-15-3	0.342736	0.0638665	1.33571	346	2.01	6	1	2.84	34.78	33.95	34.74	383.85	382.08	32.597	34.218	56.56	59.37	499.9	0	420	96.83	290	21.7	0.7	111105
clear-cut strip	15	16	13:00-14:00	Small	c-15-3	2.0534	0.0679749	1.38657	346	2.01	6	1	2.84	34.79	33.95	34.74	383.86	382.08	32.593	34.223	56.54	59.37	499.9	0	421	96.83	290	21.7	0.7	111105
clear-cut strip	15	16	13:00-14:00	Small	c-15-3	1.27483	0.066044	1.54557	346	2.02	6	1	2.84	34.79	33.95	34.74	383.87	382.08	32.589	34.222	56.53	59.36	499.9	0	422	96.82	290	21.7	0.7	111105
clear-cut strip	15	16	13:00-14:00	Small	c-15-3	0.92037	0.065924	1.61011	347	2.01	6	1	2.84	34.79	33.95	34.74	383.84	382.08	32.585	34.227	56.52	59.37	499.9	0	421	96.82	290	21.7	0.7	111105
clear-cut strip	15	16	13:00-14:00	Small	c-15-3	0.0641005	0.0536057	1.19799	348	2.01	6	1	2.84	34.79	33.95	34.75	383.84	382.14	32.577	34.234	56.5	59.38	499.9	0	421	96.82	290	21.7	0.7	111105
clear-cut strip	15	16	13:00-14:00	Small	c-15-3	5.0825	0.0717523	2.25444	245	2.88	6	1	2.84	35.85	36.19	35.67	359.26	353	29.98	32.712	48.78	53.23	499.9	0	569	96.32	3.78	0.765	0.7	111105
clear-cut strip	15	16	13:00-14:00	Small	c-15-3	3.8132	0.0625255	2.23316	248	2.85	6	1	2.84	35.86	36.1	35.67	359.31	353.12	29.957	32.699	48.71	53.17	499.9	0	536	96.32	3.78	0.765	0.7	111105
clear-cut strip	15	16	13:00-14:00	Small	c-15-3	4.0504	0.0849996	2.50838	251	2.83	6	1	2.84	35.84	36.03	35.67	359.25	353.22	29.936	32.676	48.74	53.2	499.9	0	540	96.32	3.78	0.765	0.7	111105
clear-cut strip	15	16	13:00-14:00	Small	c-15-3	3.21854	0.070126	2.14618	251	2.83	6	1	2.84	35.83	36.02	35.67	359.23	353.23	29.928	32.661	48.74	53.2	499.9	0	536	96.32	3.78	0.765	0.7	111105
clear-cut strip	15	16	13:00-14:00	Small	c-15-3	3.67094	0.0614899	2.2236	250	2.84	6	1	2.84	35.82	36.04	35.66	359.19	353.18	29.917	32.638	48.77	53.2	499.9	0	504	96.32	3.78	0.765	0.7	111105
clear-cut strip	15	21	14:30-15:30	Large	c-15-1	4.51021	0.166845	2.60885	316	1.73	6	1	2.84	32.25	32.41	32.22	384.15	377.17	29.56	32.804	58.79	65.24	499.9	0	892	96.3	47.1	-0.0292	0.7	111105
clear-cut strip	15	21	14:30-15:30	Large	c-15-1	4.46372	0.169173	2.7259	316	1.73	6	1	2.84	32.25	32.42	32.22	384.14	377.13	29.564	32.797	58.79	65.22	499.9	0	895	96.3	47.1	-0.0292	0.7	111105
clear-cut strip	15	21	14:30-15:30	Large	c-15-1	4.25285	0.159052	2.72634	314	1.73	6	1	2.84	32.25	32.42	32.22	384.11	377.03	29.569	32.786	58.79	65.19	499.9	0	901	96.3	47.1	-0.0292	0.7	111105
clear-cut strip	15	21	14:30-15:30	Large	c-15-1	5.28893	0.160046	2.87107	314	1.73	6	1	2.84	32.25	32.43	32.23	384.07	376.99	29.574	32.785	58.79	65.17	499.9	0	907	96.3	47.1	-0.0292	0.7	111105
clear-cut strip	15	21	14:30-15:30	Large	c-15-1	4.37731	0.150295	2.91239	314	1.73	6	1	2.84	32.25	32.43	32.23	384.07	376.99	29.574	32.785	58.79	65.17	499.9	0	907	96.3	47.1	-0.0292	0.7	111105
clear-cut strip	15	21	14:30-15:30	Large	c-15-1	0.488889	0.0905555	1.08956	340	1.3	6	1	2.84	32.09	30.98	32.01	387.18	384.85	32.017	33.136	64.54	66.8	499.9	0	268	96.77	287	21.4	1	111105
clear-cut strip	15	21	14:30-15:30	Large	c-15-1	1.03856	0.073101	0.815819	340	1.3	6	1	2.84	32.09	30.98	32.01	387.18	384.85	32.017	33.136	64.54	66.8	499.9	0	268	96.77	287	21.4	1	111105
clear-cut strip	15	21	14:30-15:30	Large	c-15-1	1.97516	0.0702857	0.990542	340	1.3	6	1	2.84	32.09	30.97	32.01	387.2	384.87	32.02	33.131	64.56	66.8	499.9	0	267	96.77	287	21.4	1	111105
clear-cut strip	15	21	14:30-15:30	Large	c-15-1	0.512111	0.0610296	0.743958	340	1.3	6	1	2.84	32.09	30.97	32.01	387.17	384.83	32.02	33.133	64.55	66.79	499.9	0	265	96.77	287	21.4	1	111105
clear-cut strip	15	21	14:30-15:30	Large	c-15-1	0.952193	0.0862101	0.92407	340	1.3	6	1	2.84	32.1	30.97	32.02	387.1	384.75	32.022	33.139	64.54	66.79	499.9	0	263	96.77	287	21.4	1	111105
clear-cut strip	15	18	14:30-15:30	Medium	c-15-2	4.77485	0.209511	2.9186	328	1.54	6	1	2.84	32.67	31.7	32.63	383.96	376.91	29.184	32.791	56.68	63.69	499.9	0	345	96.3	47.1	-0.0292	0.7	111105
clear-cut strip	15	18	14:30-15:30	Medium	c-15-2	4.12698	0.196463	3.18591	327	1.54	6	1	2.84	32.66	31.72	32.63	383.91	376.84	29.175	32.78	56.67	63.67	499.9	0	344	96.3	47.1	-0.0292	0.7	111105
clear-cut strip	15	18	14:30-15:30	Medium	c-15-2	4.78838	0.187019	3.33829	327	1.55	6	1	2.84	32.66	31.73	32.63	383.86	376.91	29.174	32.733	56.67	63.58	499.9	0	342	96.3	47.1	-0.0292	0.7	111105
clear-cut strip	15	18	14:30-15:30	Medium	c-15-2	4.78223	0.184109	2.91937	329	1.56	6	1	2.84	32.67	31.74	32.64	383.84	377.24	29.174	32.671	56.65	63.44	499.9	0	342	96.3	47.1	-0.0292	0.7	111105
clear-cut strip	15	18	14:30-15:30	Medium	c-15-2	3.59239	0.185703	2.79939	331	1.56	6	1	2.84	32.68	31.74	32.64	383.86	377.55	29.173	32.615	56.6	63.28	499.9	0	342	96.3	47.1	-0.0292	0.7	111105
clear-cut strip	15	18	14:30-15:30	Medium	c-15-2	0.621489	0.0623265	1.06756	353	1.54	6	1	2.84	31.86	31.77	31.91	399.51	397.7	31.739	32.762	64.82	66.91	499.9	0	177	96.77	287	21.4	0.3	111105
clear-cut strip	15	18	14:30-15:30	Medium	c-15-2	1.11182	0.0452324	1.16371	353	1.54	6	1	2.84	31.86	31.77	31.91	399.51	397.7	31.739	32.762	64.82	66.91	499.9	0	177	96.77	287	21.4	0.3	111105
clear-cut strip	15	18	14:30-15:30	Medium	c-15-2	1.48988	0.070197	0.768986	350	1.54	6	1	2.84	31.86	31.76	31.91	399.43	397.52	31.741	32.762	64.82	66.91	499.9	0	180	96.77	287	21.4	0.3	111105
clear-cut strip	15	18	14:30-15:30	Medium	c-15-2	0.75004	0.0583564	0.968101	350	1.53	6	1	2.84	31.87	31.74	31.91	399.31	397.34	31.735	32.776	64.8	66.93	499.9	0	182	96.77	287	21.4	0.3	111105
clear-cut strip	15	18	14:30-15:30	Medium	c-15-2	1.97685	0.0438227	0.901239	346	1.53	6	1	2.84	31.87	31.71	31.91	399.03	396.9	31.73	32.784	64.78	66.94	499.9	0	188	96.77	287	21.4	0.3	111105
clear-cut strip	15	16	14:30-15:30	Small	c-15-3	1.59659	0.056806	1.06996	301	1.42	6	1	2.84	31.92	31.23	31.91	391.43	387.99	31.671	32.595	64.49	66.37	499.9	0	222	96.77	287	21.4	1	111105
clear-cut strip	15	16	14:30-15:30	Small	c-15-3	2.12225	0.0653355	0.760763	301	1.42	6	1	2.84	31.92	31.23	31.91	391.43	387.99	31.671	32.595	64.49	66.37	499.9	0	222	96.77	287	21.4	1	111105
clear-cut strip	15	16	14:30-15:30	Small	c-15-3	2.04306	0.0298916	0.936603	299	1.42	6	1	2.84	31.92	31.22	31.91	391.44	387.95	31.671	32.586	64.48	66.35	499.9	0	222	96.77	287	21.4	1	111105
clear-cut strip	15	16	14:30-15:30	Small	c-15-3	1.44548	0.0533391	0.577033	297	1.41	6	1	2.84	31.91	31.21	31.92	391.42	387.87	31.674	32.581	64.5	66.34	499.8	0	221	96.77	287	21.4	1	111105
clear-cut strip	15	16	14:30-15:30	Small	c-15-3	2.23251	0.0517323	0.446136	295	1.41	6	1	2.84	31.93	31.21	31.92	391.4	387.74	31.677	32.588	64.46	66.31	499.8	0	221	96.77	287	21.4	1	111105
clear-cut strip	15	16	14:30-15:30	Small	c-15-3	1.96583	0.108202	1.94537	338	1.75	6	1	2.84	32.86	32.26	32.82	388.68	384.8	29.792	32.157	57.24	61.79	499.9	0	228	96.29	47.1	-0.0292	0.7	111105
clear-cut strip	15	16	14:30-15:30	Small	c-15-3	2.58008	0.112648	2.14814	338	1.75	6	1	2.84	32.85	32.26	32.82	388.6	384.76	29.802	32.156	57.27	61.8	499.9	0	226	96.29	47.1	-0.0292	0.7	111105
clear-cut strip	15	16	14:30-15:30	Small	c-15-3	2.79779	0.105434	2.343	337	1.75	6	1	2.84	32.85	32.26	32.82	388.57	384.66	29.811	32.159	57.3	61.81	499.9	0	224	96.29	47.1	-0.0292	0.7	111105
clear-cut strip	15	16	14:30-15:30	Small	c-15-3	1.14287	0.119674	2.10376	338	1.75	6	1	2.84	32.84	32.25	32.82	388.5	384.64	29.819	32.172	57.33	61.86	499.9	0	223	96.29	47.1	-0.0292	0.7	111105
clear-cut strip	15	16	14:30-15:30	Small	c-15-3	3.32471	0.0924605	2.22438	337	1.74	6	1	2.84	32.86	32.24	32.82	388.47	384.54	29.833	32.193	57.31	61.84	499.9	0	223	96.29	47.1	-0.0292	1	111105
uncut strip	18	21	9:30-10:30	Large	b-5-1	0.167569	0.071066	1.07503	382	1.51	6	1	2.84	31.93	31.4	31.96	401.02	400.01	30.656	32.022	62.41	65.19	499.9	0	47	96.85	290	21.4	1	111105
uncut strip	18	21	9:30-10:30	Large	b-5-1	0.197303	0.0856724	1.2711	382	1.51	6	1	2.84	31.93	31.4	31.96	401.02	400.01	30.656	32.022	62.41	65.19	499.9	0	47	96.85	290	21.4	1	111105
uncut strip	18	21	9:30-10:30	Large	b-5-1	1.36534	0.0701369	1.29363	381	1.51	6	1	2.84	31.93	31.39	31.96	401.02	399.99	30.651	32.014	62.4	65.18	499.9	0	47	96.85	290	21.4	1	111105
uncut strip	18	21	9:30-10:30	Large	b-5-1	0.4926	0.0813394	1.05778	380	1.51	6	1	2.84	31.93	31.38	31.96	401.04	399.95	30.649	32.013	62.41	65.19	499.9	0	47	96.85	290	21.4	1	111105
uncut strip	18	21	9:30-10:30	Large	b-5-1	0.571741	0.0654877	0.988933	381	1.51	6	1	2.84	31.93	31.38	31.96	401.04	399.99	30.643	32.003	62.39	65.16	499.8	0	47	96.85	290	21.4	1	111105
uncut strip	18	19	9:30-10:30	Medium	b-5-2	1.05332	0.0797344	1.34405	377	1.46	6	1	2.84	31.72	31.16	31.74	405.07	403.66	30.632	31.892	63.13	65.73	499.9	0	53	96.85	290	21.4	1	111105
uncut strip	18	19	9:30-10:30	Medium	b-5-2	1.62782	0.0723268	1.39986	377	1.46	6	1	2.84	31.72	31.16	31.74	405.07	403.66	30.632	31.892	63.13	65.73	499.9	0	53	96.85	290	21.4	1	111105
uncut strip	18	19	9:30-10:30	Medium	b-5-2	1.8995	0.0641645	1.01316	380	1.46	6	1	2.84	31.72	31.15	31.74	405.07	403.84	30.632	31.894	63.12	65.72	499.9	0	53	96.85	290	21.4	1	111105
uncut strip	18	19	9:30-10:30	Medium	b-5-2	0.696713	0.0619738	1.13056	382	1.46	6	1	2.84	31.72	31.15	31.74	405.09	403.94	30.63	31.885	63.11	65.69	499.9	0	53	96.85	290	21.4	1	111105
uncut strip	18	19	9:30-10:30	Medium	b-5-2	-0.194174	0.0702431	1.13622	384	1.46	6	1	2.84	31.72	31.14	31.73	405.08	404.02	30.624	31.886	63.09	65.69	500	0	52	96.85	290	21.4	0.7	111105
uncut strip	18	15	9:30-10:30	Small	b-5-3	-1.34648	0.0332144	0.672813	430	1.39	6	1	2.84	31.23	30.57	31.32	403.28	404.13	30.393	31.13	64.39	65.95	499.9	0	58	96.84	291	21	0.7	111105
uncut strip	18	15	9:30-10:30	Small	b-5-3	-0.488482	0.0228562	0.779886	430	1.39	6	1	2.84	31.23	30.57	31.32	403.28	404.13	30.393	31.13	64.39	65.95	499.9	0	58	96.84	291	21	0.7	111105
uncut strip	18	15	9:30-10:30	Small	b-5-3	-1.91227	0.0389815	0.853274	434	1.39	6	1	2.84	31.23	30.57	31.32	403.28	404.23	30.395	31.132	64.41	65.97	499.9	0	58	96.84	291	21	0.7	111105
uncut strip	18	15	9:30-10:30	Small	b-5-3	-0.0623691	0.0315534	0.763061	438	1.39	6	1	2.84	31.23	30.57	31.32	403.3	404.39	30.398	31.131	64.42	65.97	499.9	0	58	96.84	291	21	0.7	111105
uncut strip	18	15	9:30-10:30	Small	b-5-3	-0.492872	0.0337557	0.774545	454	1.39	6	1	2.84	31.23	30.57	31.31	403.26	404.81	30.401	31.126	64.43	65.96	499.9	0	57	96.84	291	21	0.7	111105
uncut strip	18	21	11:00-12:00	Large	b-5-1	0.876377	0.0229997	0.765347	669	2.29	6	1	2.84	33.94	32.86	34.12	366	372.41	27.409	28.227	49.57	51.05	499.9	0	42	96.32	3.78	0.765	0.3	111105
uncut strip	18	21	11:00-12:00	Large	b-5-1	0.158009	0.057519	1.10198	373	2.13	6	1	2.84	33.27	32.41	33.33	366.61	366.79	27.575	28.593	51.77	53.68	499.9	0	64	96.32	3.78	0.765	1	111105
uncut strip	18	21	11:00-12:00	Large	b-5-1	0.144109	0.0548379	0.66033	372	2.13	6	1	2.84	33.27	32.4	33.33	366.63	366.77	27.574	28.593	51.78	53.69	499.9	0	65	96.32	3.78	0.765	1	111105
uncut strip	18	21	11:00-12:00	Large	b-5-1	0.234596	0.0391346	0.683377	373	2.13	6	1	2.84	33.27	32.4	33.33	366.6	366.77	27.573	28.589	51.79	53.7	499.9	0	62	96.32	3.78	0.765	1	111105
uncut strip	18	21	11:00-12:00	Large	b-5-1	0.320195	0.0315457	0.61218	371	2.13	6	1	2.84	33.26	32.4	33.32	366.57	366.7	27.572	28.587	51.8	53.71	499.9	0	59	96.32	3.78	0.765	1	111105
uncut strip	18	21	11:00-12:00	Large	b-5-1	0.758186	0.0490889	0.883008	369	2.13	6	1	2.84	33.26	32.39	33.32	366.54	366.6	27.566	28.573	51.8	53.69	499.9	0	61	96.32	3.78	0.765	1	111105
uncut strip	18	21	11:00-12:00	Large	b-5-1	0.336589	0.03793	1.06514	366	1.9	6	1	2.84	33.55	33.01	33.58	393.87	392.76	31.28	32.566	58.14	60.53	499.9	0	76	96.84	290	21.6	0.7	111105
uncut strip	18	21	11:00-12:00	Large	b-5-1	0.238071	0.0497857	1.1524	366	1.9	6	1	2.84	33.55	33.01	33.58	393.87	392.76	31.28	32.566	58.14	60.53	499.9	0	76	96.84	290	21.6	0.7	111105
uncut strip	18	21	11:00-12:00	Large	b-5-1	0.116112	0.0354998	0.971675	365	1.9	6	1	2.84	33.55	33.01	33.58	393.87	392.71	31.278	32.571	58.14	60.54	499.9	0	76	96.84	290	21.6	0.7	111105
uncut strip	18	21	11:00-12:00	Large	b-5-1	0.124191	0.0657759	1.18222	367	1.9	6	1	2.84	33.55	33.01	33.58	393.85	392.76	31.274	32.567	58.14	60.54	499.9	0	76	96.84	290	21.6	0.7	111105
uncut strip	18	21	11:00-12:00	Large	b-5-1	0.601117	0.0691561	1.18184	367	1.9	6	1	2.84	33.55	33	33.58	393.79	392.73	31.272	32.564	58.13	60.54	499.8	0	76	96.84	290	21.6	0.7	111105
uncut strip	18	19	11:00-12:00	Medium	b-5-2	-0.710405	0.0478204	1.35327	350	2.85	6	1	2.84	35.57	35	35.6	366.27	365.76	27.604	29.085	45.62	48.06	499.9	0	87	96.32	4.73	0.512	1	111105
uncut strip	18	19	11:00-12:00	Medium	b-5-2	0.165776	0.0320763	1.19988	343	2.84	6	1	2.84	35.56	34.99	35.59	366.34	365.63	27.607	29.091	45.64	48.09	499.9	0	87	96.32	4.73	0.512	1	111105
uncut strip	18	19	11:00-12:00	Medium	b-5-2	-0.475359	0.0254544	1.13615	338	2.84	6	1	2.84	35.56	34.98	35.58	366.33	365.47	27.602	29.07	45.65	48.07	499.9	0	87	96.32	4.73	0.512	1	111105
uncut strip	18	19	11:00-12:00	Medium	b-5-2	-0.0323468	0.0461822	1.01883	342	2.84	6	1	2.84	35.55	34.98	35.58	366.29	365.55	27.609	29.065	45.68	48.08	499.9	0	86	96.32	4.73	0.512	0.7	111105
uncut strip	18	19	11:00-12:00	Medium	b-5-2	0.110138	0.0377544	1.11121	342	2.84	6	1	2.84	35.54	34.97	35.57	366.36	365.6	27.607	29.086	45.68	48.13	499.9	0	86	96.32	4.73	0.512	1	111105
uncut strip	18	19	11:00-12:00	Medium	b-5-2	1.47101	0.0470496	0.663596	344	1.75	6	1	2.84	33.09	32.29	33.15	390.81	389.27	31.138	32.105	59.37	61.22	499.9	0	105	96.84	288	21.4	0.7	111105
uncut strip	18	19	11:00-12:00	Medium	b-5-2	-0.206127	0.058634	0.615212	344	1.75	6	1	2.84	33.09	32.29	33.15	390.81	389.27	31.138	32.105	59.37	61.22	499.9	0	105	96.84	288	21.4	0.7	111105
uncut strip	18	19	11:00-12:00	Medium	b-5-2	0.0154144	0.0344754	0.899442	344	1.75	6	1	2.84	33.1	32.29	33.15	390.8	389.27	31.134	32.103	59.35	61.2	499.8	0	104	96.84	288	21.4	0.7	111105
uncut strip	18	19	11:00-12:00	Medium	b-5-2	1.31655	0.0533574	0.694033	345	1.75	6	1	2.84	33.1	32.29	33.15	390.79	389.3	31.135	32.095	59.33	61.16	499.8	0	105	96.84	288	21.4	0.7	111105
uncut strip	18	19	11:00-12:00	Medium	b-5-2	0.761828	0.0403466	0.924511	348	1.74	6	1	2.84	33.11	32.28	33.15	390.78	389.38	31.131	32.086	59.29	61.11	499.9	0	105	96.84	288	21.4	0.7	111105
uncut strip	18	15	11:00-12:00	Small	b-5-3	0.164597	0.0585543	1.09758	374	1.63	6	1	2.84	32.78	31.92	32.9	391.37	390.67	31.094	32.243	60.35	62.58	499.9	0	83	96.84	288	21.4	0.3	111105
uncut strip	18	15	11:00-12:00	Small	b-5-3	0.503073	0.0510466	0.95273	374	1.63	6	1	2.84	32.78	31.92	32.9	391.37	390.67	31.094	32.243	60.35	62.58	499.9	0	83	96.84	288	21.4	0.3	111105
uncut strip	18	15	11:00-12:00	Small	b-5-3	-0.498025	0.0397474	1.29229	374	1.63	6	1	2.84	32.78	31.92	32.9	391.36	390.66	31.096	32.249	60.35	62.59	499.9	0	83	96.84	288	21.4	0.3	111105
uncut strip	18	15	11:00-12:00	Small	b-5-3	0.289788	0.0721793	0.859456	374	1.63	6	1	2.84	32.78	31.92	32.9	391.34	390.61	31.096	32.257	60.35	62.6	499.9	0	83	96.84	288	21.4	0.3	111105
uncut strip	18	15	11:00-12:00	Small	b-5-3	0.562269	0.0684097	0.721225	374	1.63	6	1	2.84	32.78	31.93	32.9	391.3	390.59	31.101	32.267	60.34	62.61	499.9	0	83	96.84	288	21.4	0.3	111105
uncut strip	18	15	11:00-12:00	Small	b-5-3	0.676802	0.0525088	1.06404	376	1.63	6	1	2.84	32.79	31.94	32.89	391.2	390.55	31.103	32.275	60.34	62.61	499.9	0	82	96.84	288	21.4	0.3	111105
uncut strip	18	15	11:00-12:00	Small	b-5-3	1.52937	0.0303482	0.983787	325	3.05	6	1	2.84	36.57	35.73	36.64	367.27	366.23	28.166	29.422	44.05	46.01	499.9	0	63	96.33	4.73	0.512	0.7	111105
uncut strip	18	15	11:00-12:00	Small	b-5-3	0.307384	0.0294279	1.13072	322	3.04	6	1	2.84	36.57	35.72	36.63	367.24	366.13	28.161	29.416	44.05	46.02	499.9	0	61	96.33	4.73	0.512	0.7	111105
uncut strip	18	15	11:00-12:00	Small	b-5-3	0.469352	0.0236653	0.939033	324	3.04	6	1	2.84	36.56	35.69	36.62	367.16	366.1	28.155	29.408	44.07	46.03	499.9	0	58	96.33	4.73	0.512	0.7	111105
uncut strip	18	15	11:00-12:00	Small	b-5-3	0.0503708	0.0160828	1.13318	324	3.03	6	1	2.84	36.55	35.67	36.62	367.11	366.06	28.153	29.396	44.08	46.02	499.9	0	56	96.33	4.73	0.512	0.7	111105
uncut strip	18	15	11:00-12:00	Small	b-5-3	0.250459	0.055635	0.825368	327	3.03	6	1	2.84	36.54	35.66	36.61	366.97	365.99	28.151	29.394	44.1	46.05	499.9	0	54	96.33	4.73	0.512	0.7	111105
uncut strip	18	21	13:00-14:00	Large	b-5-1	-0.430691	0.051468	1.13567	367	2.5	6	1	2.84	34.37	33.72	34.38	364.5	364.56	27.557	28.719	48.64	50.69	499.9	0	42	96.27	2.71	0.729	0.7	111105
uncut strip	18	21	13:00-14:00	Large	b-5-1	-0.692443	0.0475964	0.995351	366	2.5	6	1	2.84	34.37	33.73	34.38	364.51	364.54	27.554	28.715	48.63	50.68	499.9	0	42	96.27	2.71	0.729	0.7	111105
uncut strip	18	21	13:00-14:00	Large	b-5-1	-0.342103	0.0442465	0.856798	366	2.5	6	1	2.84	34.37	33.74	34.38	364.52	364.55	27.554	28.708	48.63	50.67	499.9	0	42	96.28	2.71	0.729	0.7	111105
uncut strip	18	21	13:00-14:00	Large	b-5-1	1.22442	0.0356038	1.0155	365	2.5	6	1	2.84	34.37	33.72	34.38	364.53	364.53	27.552	28.703	48.64	50.67	499.9	0	42	96.27	2.71	0.729	0.7	111105
uncut strip	18	21	13:00-14:00	Large	b-5-1	0.406368	0.0466366	0.93443	363	2.49	6	1	2.84	34.36	33.71	34.38	364.52	364.49	27.551	28.693	48.65	50.66	499.9	0	42	96.27	2.71	0.729	0.7	111105
uncut strip	18	21	13:00-14:00	Large	b-5-1	0.0510367	0.0532428	0.84982	366	1.6	6	1	2.84	32.37	31.91	32.41	385.38	384.75	31.682	32.573	62.86	64.63	499.8	0	50	96.73	287	21.5	1	111105
uncut strip	18	21	13:00-14:00	Large	b-5-1	0.158122	0.0449834	0.70206	366	1.6	6	1	2.84	32.37	31.91	32.41	385.38	384.75	31.682	32.573	62.86	64.63	499.8	0	50	96.73	287	21.5	1	111105
uncut strip	18	21	13:00-14:00	Large	b-5-1	1.07574	0.0470654	0.966781	365	1.6	6	1	2.84	32.37	31.92	32.41	385.44	384.77	31.684	32.571	62.87	64.63	499.8	0	50	96.73	287	21.5	1	111105
uncut strip	18	21	13:00-14:00	Large	b-5-1	0.457595	0.0491079	0.770231	365	1.6	6	1	2.84	32.37	31.92	32.41	385.52	384.84	31.683	32.576	62.86	64.64	499.9	0	50	96.73	287	21.5	1	111105
uncut strip	18	21	13:00-14:00	Large	b-5-1	1.15781	0.0385598	0.779739	363	1.6	6	1	2.84	32.37	31.92	32.41	385.7	384.95	31.685	32.579	62.87	64.64	500	0	50	96.73	287	21.5	1	111105
uncut strip	18	19	13:00-14:00	Medium	b-5-2	0.531387	0.031827	0.668221	368	2.05	6	1	2.84	33.07	32.41	33.14	384.47	384.02	28.507	29.456	54.12	55.92	499.9	0	53	96.27	47.1	-0.0292	0.3	111105
uncut strip	18	19	13:00-14:00	Medium	b-5-2	1.14147	0.0555257	0.752033	367	2.05	6	1	2.84	33.06	32.4	33.14	384.4	383.92	28.516	29.465	54.15	55.95	499.9	0	52	96.27	47.1	-0.0292	0.3	111105
uncut strip	18	19	13:00-14:00	Medium	b-5-2	0.0305249	0.0299264	0.904567	362	2.05	6	1	2.84	33.06	32.4	33.13	384.39	383.78	28.528	29.468	54.17	55.96	499.9	0	52	96.27	47.1	-0.0292	0.3	111105
uncut strip	18	19	13:00-14:00	Medium	b-5-2	0.314152	0.038067	0.993875	358	2.05	6	1	2.84	33.06	32.4	33.13	384.34	383.65	28.535	29.468	54.19	55.97	499.9	0	51	96.27	47.1	-0.0292	0.7	111105
uncut strip	18	19	13:00-14:00	Medium	b-5-2	0.136378	0.0185929	0.861524	362	2.04	6	1	2.84	33.06	32.39	33.13	384.27	383.67	28.545	29.474	54.22	55.98	499.9	0	51	96.27	47.1	-0.0292	0.7	111105
uncut strip	18	19	13:00-14:00	Medium	b-5-2	2.037	0.0560379	0.561106	344	1.58	6	1	2.84	32.32	31.84	32.37	387.97	386.57	31.719	32.571	63.1	64.8	499.8	0	61	96.73	287	21.5	0.7	111105
uncut strip	18	19	13:00-14:00	Medium	b-5-2	1.90818	0.0394246	0.7958	344	1.58	6	1	2.84	32.32	31.84	32.37	387.97	386.57	31.719	32.571	63.1	64.8	499.8	0	61	96.73	287	21.5	0.7	111105
uncut strip	18	19	13:00-14:00	Medium	b-5-2	1.73854	0.0389946	0.583154	346	1.58	6	1	2.84	32.32	31.84	32.37	387.94	386.6	31.719	32.568	63.1	64.79	499.9	0	61	96.73	287	21.5	1	111105
uncut strip	18	19	13:00-14:00	Medium	b-5-2	0.351883	0.0584538	0.400074	347	1.58	6	1	2.84	32.32	31.83	32.37	387.94	386.63	31.722	32.567	63.1	64.79	500	0	61	96.73	287	21.5	1	111105
uncut strip	18	19	13:00-14:00	Medium	b-5-2	0.760863	0.0560267	0.517346	345	1.58	6	1	2.84	32.32	31.82	32.37	387.9	386.56	31.723	32.566	63.1	64.78	500.1	0	61	96.73	287	21.5	1	111105
uncut strip	18	15	13:00-14:00	Small	b-5-3	-1.22868	0.0751056	0.837947	372	1.51	6	1	2.84	32.37	31.59	32.35	386.49	385.96	31.683	32.636	62.87	64.76	499.8	0	53	96.73	287	21.5	0.7	111105
uncut strip	18	15	13:00-14:00	Small	b-5-3	-0.24972	0.0531009	0.538634	372	1.51	6	1	2.84	32.37	31.59	32.35	386.49	385.96	31.683	32.636	62.87	64.76	499.8	0	53	96.73	287	21.5	0.7	111105
uncut strip	18	15	13:00-14:00	Small	b-5-3	-0.148249	0.0370375	0.832964	373	1.51	6	1	2.84	32.36	31.58	32.35	386.44	385.96	31.682	32.638	62.88	64.78	499.8	0	53	96.73	287	21.5	0.7	111105
uncut strip	18	15	13:00-14:00	Small	b-5-3	0.669723	0.0500862	0.831971	373	1.51	6	1	2.84	32.36	31.58	32.35	386.46	385.95	31.685	32.639	62.89	64.78	499.9	0	53	96.73	287	21.5	0.7	111105
uncut strip	18	15	13:00-14:00	Small	b-5-3	-0.0315869	0.0656783	0.709147	371	1.5	6	1	2.84	32.36	31.57	32.35	386.45	385.87	31.683	32.626	62.9	64.77	499.9	0	54	96.73	287	21.5	0.7	111105
uncut strip	18	15	13:00-14:00	Small	b-5-3	1.23314	0.0978192	1.70672	368	1.83	6	1	2.84	32.97	32.1	33.03	383.09	382.21	28.956	30.815	55.27	58.81	499.9	0	70	96.27	47.1	-0.0292	0.7	111105
uncut strip	18	15	13:00-14:00	Small	b-5-3	-0.446537	0.0793087	1.27573	365	1.83	6	1	2.84	32.97	32.09	33.03	383.1	382.03	28.956	30.806	55.27	58.8	499.9	0	70	96.27	47.1	-0.0292	0.7	111105
uncut strip	18	15	13:00-14:00	Small	b-5-3	0.74225	0.0864725	1.70895	364	1.83	6	1	2.84	32.97	32.09	33.03	383.11	381.99	28.954	30.8	55.26	58.79	499.9	0	70	96.27	47.1	-0.0292	0.7	111105
uncut strip	18	15	13:00-14:00	Small	b-5-3	1.24125	0.0903854	1.29383	363	1.83	6	1	2.84	32.97	32.08	33.03	383.11	381.94	28.953	30.789	55.27	58.77	499.9	0	70	96.27	47.1	-0.0292	0.7	111105
uncut strip	18	15	13:00-14:00	Small	b-5-3	1.01252	0.0790266	1.82684	362	1.83	6	1	2.84	32.97	32.07	33.03	383.09	381.87	28.951	30.792	55.27	58.78	499.9	0	71	96.27	47.1	-0.0292	0.7	111105
uncut strip	18	21	14:30-15:30	Large	b-5-1	1.27945	0.0945823	1.94373	365	1.93	6	1	2.84	34.21	32.79	34.18	394.61	392.6	29.485	31.796	52.51	56.62	499.9	0	25	96.26	47.1	-0.0292	0.3	111105
uncut strip	18	21	14:30-15:30	Large	b-5-1	1.00554	0.111652	1.95498	366	1.93	6	1	2.84	34.21	32.79	34.18	394.53	392.58	29.481	31.793	52.5	56.62	499.9	0	25	96.26	47.1	-0.0292	0.3	111105
uncut strip	18	21	14:30-15:30	Large	b-5-1	0.751649	0.0936427	1.97501	366	1.93	6	1	2.84	34.21	32.78	34.18	394.41	392.48	29.475	31.782	52.47	56.58	499.9	0	25	96.26	47.1	-0.0292	0.3	111105
uncut strip	18	21	14:30-15:30	Large	b-5-1	0.105756	0.116231	1.88273	366	1.93	6	1	2.84	34.21	32.77	34.17	394.29	392.39	29.469	31.774	52.49	56.59	499.9	0	25	96.26	47.1	-0.0292	0.3	111105
uncut strip	18	21	14:30-15:30	Large	b-5-1	0.046005	0.0968524	1.99103	367	1.93	6	1	2.84	34.2	32.77	34.17	394.12	392.25	29.461	31.762	52.5	56.6	499.9	0	26	96.26	47.1	-0.0292	0.3	111105
uncut strip	18	21	14:30-15:30	Large	b-5-1	2.08262	0.0206385	0.252588	255	1.24	6	1	2.84	30.77	30.17	30.74	397.08	395.24	31.424	31.691	68.27	68.85	499.9	0	27	96.75	286	21	0.7	111105
uncut strip	18	21	14:30-15:30	Large	b-5-1	1.24011	0.00948499	0.310531	255	1.24	6	1	2.84	30.77	30.17	30.74	397.08	395.24	31.424	31.691	68.27	68.85	499.9	0	27	96.75	286	21	0.7	111105
uncut strip	18	21	14:30-15:30	Large	b-5-1	1.29013	0.026212	0.278182	255	1.24	6	1	2.84	30.79	30.17	30.74	397	395.18	31.427	31.69	68.22	68.79	499.9	0	27	96.75	286	21	0.7	111105
uncut strip	18	21	14:30-15:30	Large	b-5-1	1.56562	0.0211316	0.463138	255	1.24	6	1	2.84	30.79	30.17	30.74	396.87	395.07	31.426	31.688	68.21	68.78	499.9	0	27	96.75	286	21	0.7	111105
uncut strip	18	21	14:30-15:30	Large	b-5-1	1.54918	0.0121643	0.216553	240	1.24	6	1	2.84	30.79	30.17	30.74	396.75	394.8	31.429	31.685	68.21	68.76	499.9	0	26	96.75	286	21	0.7	111105
uncut strip	18	19	14:30-15:30	Medium	b-5-2	1.58525	0.0432214	1.08202	316	2.12	6	1	2.84	33.5	32.9	33.62	385.71	383.48	29.005	30.155	53.73	55.86	499.9	0	64	96.25	47.1	-0.0292	0.7	111105
uncut strip	18	19	14:30-15:30	Medium	b-5-2	2.48764	0.0627841	0.774039	314	2.12	6	1	2.84	33.5	32.9	33.62	385.71	383.45	29.012	30.152	53.74	55.85	499.9	0	64	96.25	47.1	-0.0292	0.7	111105
uncut strip	18	19	14:30-15:30	Medium	b-5-2	1.18077	0.0584774	0.877674	312	2.12	6	1	2.84	33.5	32.9	33.63	385.68	383.39	29.016	30.145	53.74	55.83	499.9	0	65	96.25	47.1	-0.0292	0.7	111105
uncut strip	18	19	14:30-15:30	Medium	b-5-2	2.37996	0.0403351	0.967428	310	2.12	6	1	2.84	33.51	32.91	33.63	385.64	383.3	29.016	30.141	53.74	55.82	499.9	0	65	96.25	47.1	-0.0292	0.7	111105
uncut strip	18	19	14:30-15:30	Medium	b-5-2	2.60826	0.0607745	0.981219	312	2.13	6	1	2.84	33.51	32.91	33.63	385.6	383.3	29.017	30.142	53.74	55.82	499.9	0	65	96.25	47.1	-0.0292	0.7	111105
uncut strip	18	19	14:30-15:30	Medium	b-5-2	3.06672	0.00312926	0.136198	-91.7	1.27	6	1	2.84	30.72	30.33	30.76	396.52	393.22	31.571	31.714	68.79	69.1	499.8	0	51	96.75	286	21	0.7	111105
uncut strip	18	19	14:30-15:30	Medium	b-5-2	2.15345	0.0116449	-0.0391346	-91.7	1.27	6	1	2.84	30.72	30.33	30.76	396.52	393.22	31.571	31.714	68.79	69.1	499.8	0	51	96.75	286	21	0.7	111105
uncut strip	18	19	14:30-15:30	Medium	b-5-2	2.3914	0.00580519	0.189199	-102	1.27	6	1	2.84	30.72	30.33	30.76	396.57	393.18	31.569	31.712	68.78	69.1	499.8	0	51	96.75	286	21	0.7	111105
uncut strip	18	19	14:30-15:30	Medium	b-5-2	2.77823	0.0143241	0.307641	-118	1.27	6	1	2.84	30.72	30.33	30.76	396.6	393.16	31.57	31.712	68.78	69.09	499.9	0	51	96.75	286	21	0.7	111105
uncut strip	18	19	14:30-15:30	Medium	b-5-2	1.89359	0.00800221	0.303514	-123	1.27	6	1	2.84	30.73	30.33	30.76	396.65	393.11	31.567	31.71	68.76	69.08	499.9	0	51	96.75	286	21	0.7	111105
uncut strip	18	15	14:30-15:30	Small	b-5-3	1.67918	0.0251973	0.28937	317	1.33	6	1	2.84	30.75	30.63	30.77	391.73	390.38	31.544	31.95	68.64	69.52	499.9	0	41	96.75	286	21	1	111105
uncut strip	18	15	14:30-15:30	Small	b-5-3	1.58039	0.0206577	0.229678	317	1.33	6	1	2.84	30.75	30.63	30.77	391.73	390.38	31.544	31.95	68.64	69.52	499.9	0	41	96.75	286	21	1	111105
uncut strip	18	15	14:30-15:30	Small	b-5-3	1.10555	0.0202433	0.271463	319	1.32	6	1	2.84	30.75	30.61	30.78	391.7	390.36	31.544	31.949	68.63	69.51	499.9	0	40	96.75	286	21	1	111105
uncut strip	18	15	14:30-15:30	Small	b-5-3	1.0287	0.0313295	0.178913	321	1.32	6	1	2.84	30.75	30.59	30.78	391.63	390.33	31.542	31.949	68.63	69.51	499.9	0	40	96.75	286	21	0.7	111105
uncut strip	18	15	14:30-15:30	Small	b-5-3	1.58026	0.0137694	0.519013	324	1.31	6	1	2.84	30.75	30.56	30.78	391.58	390.32	31.539	31.948	68.63	69.52	499.9	0	40	96.75	286	21	0.7	111105
uncut strip	18	15	14:30-15:30	Small	b-5-3	2.7249	0.0730726	1.34656	329	1.98	6	1	2.84	33.46	32.53	33.5	386.49	383.54	28.787	30.564	53.44	56.74	499.9	0	43	96.25	47.1	-0.0292	0.7	111105
uncut strip	18	15	14:30-15:30	Small	b-5-3	1.49653	0.0549836	1.6362	330	1.98	6	1	2.84	33.46	32.53	33.5	386.47	383.52	28.786	30.569	53.44	56.75	499.9	0	43	96.25	47.1	-0.0292	0.7	111105
uncut strip	18	15	14:30-15:30	Small	b-5-3	1.69375	0.0842005	1.48998	330	1.98	6	1	2.84	33.46	32.53	33.5	386.47	383.55	28.787	30.566	53.43	56.74	499.9	0	43	96.25	47.1	-0.0292	0.7	111105
uncut strip	18	15	14:30-15:30	Small	b-5-3	3.24225	0.0633572	1.71446	327	1.98	6	1	2.84	33.46	32.53	33.5	386.44	383.36	28.787	30.554	53.44	56.72	499.9	0	43	96.25	47.1	-0.0292	0.7	111105
uncut strip	18	15	14:30-15:30	Small	b-5-3	2.60207	0.0782465	1.61524	328	1.98	6	1	2.84	33.46	32.52	33.5	386.4	383.42	28.784	30.547	53.44	56.72	499.9	0	43	96.25	47.1	-0.0292	0.7	111105
uncut strip	10	16	9:30-10:30	Large	b-3-1	0.0353431	0.10367	1.19599	393	1.38	6	1	2.84	31.21	30.76	31.29	406.33	405.52	30.26	31.699	64.19	67.24	499.9	0	91	96.85	291	21.2	0.7	111105
uncut strip	10	16	9:30-10:30	Large	b-3-1	0.328725	0.0945197	1.48626	393	1.38	6	1	2.84	31.21	30.76	31.29	406.33	405.52	30.26	31.699	64.19	67.24	499.9	0	91	96.85	291	21.2	0.7	111105
uncut strip	10	16	9:30-10:30	Large	b-3-1	0.527214	0.0846573	1.25851	394	1.38	6	1	2.84	31.21	30.76	31.29	406.26	405.52	30.259	31.697	64.19	67.24	499.9	0	91	96.85	291	21.2	0.7	111105
uncut strip	10	16	9:30-10:30	Large	b-3-1	0.276083	0.104392	1.18305	393	1.38	6	1	2.84	31.21	30.76	31.29	406.25	405.48	30.257	31.699	64.18	67.24	499.9	0	91	96.85	291	21.2	0.7	111105
uncut strip	10	16	9:30-10:30	Large	b-3-1	0.47277	0.086333	1.40488	395	1.38	6	1	2.84	31.21	30.76	31.29	406.12	405.44	30.26	31.701	64.18	67.24	499.9	0	91	96.85	291	21.2	0.7	111105
uncut strip	10	15	9:30-10:30	Medium	b-3-2	1.98723	0.0429176	0.60107	355	1.39	6	1	2.84	31.53	30.78	31.55	412.5	410.23	30.711	31.651	63.97	65.92	499.9	0	54	96.85	291	21.2	0.7	111105
uncut strip	10	15	9:30-10:30	Medium	b-3-2	1.71065	0.0408931	0.875782	358	1.39	6	1	2.84	31.53	30.78	31.55	412.4	410.23	30.705	31.654	63.95	65.93	499.9	0	54	96.85	291	21.2	0.7	111105
uncut strip	10	15	9:30-10:30	Medium	b-3-2	2.62542	0.0569331	0.86611	357	1.39	6	1	2.84	31.52	30.78	31.55	412.25	410.08	30.705	31.644	63.99	65.94	499.9	0	54	96.85	291	21.2	0.7	111105
uncut strip	10	15	9:30-10:30	Medium	b-3-2	2.27775	0.0576044	1.1224	358	1.39	6	1	2.84	31.52	30.78	31.55	412.17	410	30.705	31.65	63.99	65.96	499.9	0	54	96.85	291	21.2	0.7	111105
uncut strip	10	15	9:30-10:30	Medium	b-3-2	2.12399	0.0535838	0.983506	359	1.39	6	1	2.84	31.53	30.77	31.55	412.07	409.96	30.7	31.65	63.96	65.94	499.9	0	54	96.85	291	21.2	0.7	111105
uncut strip	10	16	9:30-10:30	Small	b-3-3	2.09794	0.0569046	0.863735	350	1.46	6	1	2.84	31.78	31.15	31.79	418.03	414.89	30.742	31.899	63.15	65.53	499.9	0	60	96.86	291	21.2	0.7	111105
uncut strip	10	16	9:30-10:30	Small	b-3-3	1.54439	0.0735743	1.12274	353	1.46	6	1	2.84	31.78	31.14	31.79	417.87	414.86	30.74	31.896	63.14	65.51	499.9	0	60	96.86	291	21.2	0.7	111105
uncut strip	10	16	9:30-10:30	Small	b-3-3	2.24513	0.0686771	0.955877	353	1.46	6	1	2.84	31.78	31.14	31.79	417.87	414.86	30.74	31.896	63.14	65.51	499.9	0	60	96.86	291	21.2	0.7	111105
uncut strip	10	16	9:30-10:30	Small	b-3-3	1.88089	0.0516231	1.15773	353	1.46	6	1	2.84	31.79	31.14	31.79	417.54	414.57	30.739	31.889	63.1	65.47	499.9	0	60	96.86	291	21.2	0.7	111105
uncut strip	10	16	9:30-10:30	Small	b-3-3	2.20605	0.0632866	1.09646	358	1.46	6	1	2.84	31.77	31.14	31.78	417.08	414.39	30.734	31.884	63.16	65.52	499.9	0	59	96.86	291	21.2	0.7	111105
uncut strip	10	16	11:00-12:00	Large	b-3-1	0.129785	0.0291984	1.13964	343	2.9	6	1	2.84	36.09	35.01	36.24	370.12	369.33	27.104	28.52	43.55	45.83	499.9	0	77	96.36	4.73	0.512	0.7	111105
uncut strip	10	16	11:00-12:00	Large	b-3-1	-0.221323	0.0403842	1.25626	344	2.9	6	1	2.84	36.08	35.01	36.24	370.11	369.35	27.107	28.52	43.56	45.83	499.9	0	77	96.36	4.73	0.512	0.7	111105
uncut strip	10	16	11:00-12:00	Large	b-3-1	0.458613	0.0350057	1.10234	343	2.9	6	1	2.84	36.08	35	36.23	370.13	369.34	27.11	28.514	43.57	45.83	499.9	0	77	96.36	4.73	0.512	0.7	111105
uncut strip	10	16	11:00-12:00	Large	b-3-1	0.729744	0.050549	1.47782	344	2.9	6	1	2.84	36.08	34.99	36.23	370.12	369.36	27.109	28.513	43.57	45.83	499.9	0	77	96.36	4.73	0.512	0.7	111105
uncut strip	10	16	11:00-12:00	Large	b-3-1	0.117491	0.0186217	1.15718	344	2.9	6	1	2.84	36.08	34.99	36.23	370.1	369.33	27.11	28.526	43.58	45.85	499.9	0	77	96.36	4.73	0.512	0.7	111105
uncut strip	10	16	11:00-12:00	Large	b-3-1	0.698948	0.0494407	1.29343	356	2.17	6	1	2.84	34.74	34.16	34.73	395.75	393.98	31.567	33.215	54.93	57.79	499.9	0	95	96.85	291	21.8	0.3	111105
uncut strip	10	16	11:00-12:00	Large	b-3-1	0.592573	0.0424266	1.19868	356	2.17	6	1	2.84	34.74	34.16	34.73	395.75	393.98	31.567	33.215	54.93	57.79	499.9	0	95	96.85	291	21.8	0.3	111105
uncut strip	10	16	11:00-12:00	Large	b-3-1	1.15633	0.0480597	1.42993	357	2.17	6	1	2.84	34.74	34.16	34.73	395.71	393.99	31.563	33.211	54.9	57.77	499.8	0	96	96.85	291	21.8	0.7	111105
uncut strip	10	16	11:00-12:00	Large	b-3-1	0.224161	0.0664608	1.32858	356	2.17	6	1	2.84	34.74	34.15	34.73	395.72	393.96	31.561	33.211	54.91	57.78	499.8	0	96	96.85	291	21.8	0.7	111105
uncut strip	10	16	11:00-12:00	Large	b-3-1	1.39947	0.0724455	1.73582	356	2.17	6	1	2.84	34.74	34.13	34.73	395.72	393.95	31.552	33.206	54.9	57.77	499.8	0	95	96.85	291	21.8	0.7	111105
uncut strip	10	15	11:00-12:00	Medium	b-3-2	1.10081	0.03783	1.41117	277	3.25	6	1	2.84	37.84	36.3	38.01	384.24	380.62	27.426	29.293	40.04	42.77	499.9	0	53	96.36	2.44	0.458	0.7	111105
uncut strip	10	15	11:00-12:00	Medium	b-3-2	2.53631	0.0368216	1.79919	279	3.24	6	1	2.84	37.84	36.3	38.01	384.31	380.71	27.428	29.302	40.04	42.78	499.9	0	52	96.36	2.44	0.458	0.7	111105
uncut strip	10	15	11:00-12:00	Medium	b-3-2	2.9635	0.0346856	1.38653	275	3.24	6	1	2.84	37.84	36.3	38.01	384.4	380.66	27.428	29.314	40.05	42.81	499.9	0	52	96.36	2.44	0.458	0.7	111105
uncut strip	10	15	11:00-12:00	Medium	b-3-2	2.44185	0.0557785	1.7187	276	3.25	6	1	2.84	37.84	36.31	38.01	384.47	380.75	27.427	29.318	40.05	42.81	499.9	0	51	96.36	2.44	0.458	1	111105
uncut strip	10	15	11:00-12:00	Medium	b-3-2	2.14495	0.0624893	1.60619	276	3.25	6	1	2.84	37.83	36.33	38	384.6	380.9	27.429	29.315	40.07	42.82	499.9	0	51	96.36	2.44	0.458	1	111105
uncut strip	10	15	11:00-12:00	Medium	b-3-2	0.983933	0.0651019	1.44738	364	1.99	6	1	2.84	34.19	33.56	34.28	400.41	398.65	31.697	33.343	56.85	59.81	499.9	0	96	96.85	291	21.8	0.7	111105
uncut strip	10	15	11:00-12:00	Medium	b-3-2	1.13047	0.0595409	1.51093	363	1.98	6	1	2.84	34.19	33.56	34.28	400.35	398.53	31.697	33.346	56.85	59.81	499.9	0	96	96.85	291	21.8	0.7	111105
uncut strip	10	15	11:00-12:00	Medium	b-3-2	1.00291	0.0670869	1.51206	363	1.99	6	1	2.84	34.19	33.57	34.28	400.28	398.48	31.698	33.34	56.85	59.8	499.9	0	95	96.85	291	21.8	0.7	111105
uncut strip	10	15	11:00-12:00	Medium	b-3-2	0.320549	0.0778691	1.44476	362	1.99	6	1	2.84	34.19	33.57	34.28	400.21	398.38	31.698	33.341	56.86	59.8	499.9	0	95	96.85	291	21.8	0.7	111105
uncut strip	10	15	11:00-12:00	Medium	b-3-2	0.192326	0.0728569	1.49204	361	1.99	6	1	2.84	34.19	33.57	34.28	400.07	398.17	31.697	33.345	56.85	59.81	499.9	0	95	96.85	291	21.8	0.7	111105
uncut strip	10	16	11:00-12:00	Small	b-3-3	0.811324	0.0752044	1.52864	379	1.92	6	1	2.84	34.03	33.27	34.08	397.34	396.5	31.612	33.143	57.21	59.98	499.9	0	111	96.84	290	21.8	0.7	111105
uncut strip	10	16	11:00-12:00	Small	b-3-3	0.450037	0.0803008	1.40268	379	1.92	6	1	2.84	34.03	33.27	34.08	397.29	396.43	31.612	33.143	57.21	59.98	500	0	111	96.84	290	21.8	0.7	111105
uncut strip	10	16	11:00-12:00	Small	b-3-3	1.39905	0.0591369	1.49856	378	1.92	6	1	2.84	34.03	33.28	34.08	397.24	396.35	31.613	33.153	57.21	60	500	0	111	96.84	290	21.8	0.7	111105
uncut strip	10	16	11:00-12:00	Small	b-3-3	-0.050887	0.0856717	1.33334	377	1.92	6	1	2.84	34.03	33.29	34.08	397.22	396.28	31.612	33.159	57.21	60.01	500	0	111	96.84	290	21.8	0.7	111105
uncut strip	10	16	11:00-12:00	Small	b-3-3	0.134408	0.074952	1.46616	376	1.93	6	1	2.84	34.03	33.3	34.08	397.23	396.25	31.61	33.161	57.2	60.01	500	0	111	96.84	290	21.8	0.7	111105
uncut strip	10	16	11:00-12:00	Small	b-3-3	1.34186	0.0379113	1.482	263	3.57	6	1	2.84	38.56	37.36	38.81	370.19	366.63	27.629	29.631	38.79	41.61	499.9	0	103	96.37	2.44	0.458	1	111105
uncut strip	10	16	11:00-12:00	Small	b-3-3	3.12526	0.0405566	1.73084	264	3.57	6	1	2.84	38.56	37.36	38.81	370.16	366.64	27.628	29.625	38.8	41.61	499.9	0	104	96.37	2.44	0.458	1	111105
uncut strip	10	16	11:00-12:00	Small	b-3-3	1.54416	0.0294941	1.67365	263	3.58	6	1	2.84	38.56	37.37	38.81	370.2	366.69	27.622	29.614	38.79	41.59	499.9	0	103	96.37	2.44	0.458	0.7	111105
uncut strip	10	16	11:00-12:00	Small	b-3-3	2.96688	0.0403446	1.90672	267	3.59	6	1	2.84	38.56	37.39	38.8	370.16	366.78	27.618	29.617	38.79	41.6	499.9	0	103	96.37	2.44	0.458	0.7	111105
uncut strip	10	16	11:00-12:00	Small	b-3-3	2.19686	0.0467191	1.88984	272	3.59	6	1	2.84	38.56	37.41	38.8	370.18	366.94	27.616	29.621	38.78	41.59	499.9	0	102	96.37	2.44	0.458	0.7	111105
uncut strip	10	16	13:00-14:00	Large	b-3-1	0.631121	0.0172763	0.891474	313	2.91	6	1	2.84	35.47	35.2	35.5	364.27	363.28	28.161	29.108	46.78	48.35	499.9	0	407	96.29	2.71	0.729	0.7	111105
uncut strip	10	16	13:00-14:00	Large	b-3-1	-0.601167	0.0135089	0.876391	310	2.9	6	1	2.84	35.47	35.16	35.5	364.28	363.21	28.149	29.111	46.77	48.36	499.9	0	450	96.29	2.71	0.729	0.7	111105
uncut strip	10	16	13:00-14:00	Large	b-3-1	1.26501	0.0154914	0.828174	301	2.89	6	1	2.84	35.46	35.14	35.5	364.26	363.01	28.14	29.095	46.76	48.35	499.9	0	469	96.29	2.71	0.729	0.7	111105
uncut strip	10	16	13:00-14:00	Large	b-3-1	0.764202	0.0457165	0.955566	284	2.88	6	1	2.84	35.46	35.12	35.5	364.09	362.48	28.109	29.079	46.71	48.33	499.9	0	393	96.29	2.71	0.729	0.7	111105
uncut strip	10	16	13:00-14:00	Large	b-3-1	2.13042	0.0133925	0.779108	285	2.89	6	1	2.84	35.46	35.12	35.5	364.06	362.49	28.107	29.075	46.71	48.32	499.9	0	393	96.29	2.71	0.729	0.7	111105
uncut strip	10	16	13:00-14:00	Large	b-3-1	0.783288	0.0317566	0.91618	283	2.89	6	1	2.84	35.46	35.14	35.5	364.04	362.44	28.103	29.064	46.7	48.29	499.9	0	398	96.29	2.71	0.729	0.7	111105
uncut strip	10	16	13:00-14:00	Large	b-3-1	1.17218	0.0243503	0.93767	279	2.89	6	1	2.84	35.46	35.14	35.5	364.05	362.39	28.102	29.057	46.7	48.28	499.9	0	398	96.3	2.71	0.729	0.7	111105
uncut strip	10	16	13:00-14:00	Large	b-3-1	1.36842	0.0365659	0.721084	285	2.9	6	1	2.84	35.47	35.14	35.5	364.01	362.45	28.096	29.056	46.68	48.27	499.9	0	406	96.3	2.71	0.729	0.7	111105
uncut strip	10	16	13:00-14:00	Large	b-3-1	0.945985	0.0186146	0.621128	361	2.03	6	1	2.84	34.24	33.54	34.23	394.06	393.3	32.003	32.783	57.2	58.59	499.9	0	85	96.8	291	21.3	0.7	111105
uncut strip	10	16	13:00-14:00	Large	b-3-1	0.889467	0.0320112	0.889602	363	2.03	6	1	2.84	34.25	33.54	34.23	394.11	393.39	32.003	32.786	57.19	58.59	499.9	0	85	96.8	291	21.3	0.7	111105
uncut strip	10	16	13:00-14:00	Large	b-3-1	0.918077	0.0472992	0.427574	366	2.03	6	1	2.84	34.26	33.54	34.23	394.12	393.48	32.004	32.788	57.16	58.56	499.9	0	85	96.8	291	21.3	0.7	111105
uncut strip	10	16	13:00-14:00	Large	b-3-1	0.755378	0.0330041	0.763903	361	2.03	6	1	2.84	34.25	33.54	34.23	394.2	393.43	32.004	32.785	57.17	58.57	499.9	0	84	96.8	291	21.3	0.7	111105
uncut strip	10	16	13:00-14:00	Large	b-3-1	-0.522833	0.0247179	0.77612	365	2.03	6	1	2.84	34.24	33.54	34.23	394.29	393.6	32.001	32.792	57.2	58.62	499.9	0	84	96.8	291	21.3	0.7	111105
uncut strip	10	15	13:00-14:00	Medium	b-3-2	1.8164	0.0434771	1.0984	299	2.72	6	1	2.84	35.25	34.62	35.28	363.42	361.93	28.152	29.208	47.32	49.1	499.9	0	110	96.29	2.71	0.729	1	111105
uncut strip	10	15	13:00-14:00	Medium	b-3-2	1.57904	0.0426522	1.04025	304	2.72	6	1	2.84	35.26	34.63	35.29	363.39	362.01	28.15	29.21	47.29	49.08	499.9	0	112	96.29	2.71	0.729	1	111105
uncut strip	10	15	13:00-14:00	Medium	b-3-2	0.352567	0.050115	0.6117	305	2.72	6	1	2.84	35.28	34.62	35.29	363.42	362.06	28.149	29.21	47.26	49.04	499.9	0	112	96.29	2.71	0.729	1	111105
uncut strip	10	15	13:00-14:00	Medium	b-3-2	1.94776	0.0314467	0.764784	305	2.72	6	1	2.84	35.28	34.62	35.29	363.44	362.08	28.148	29.203	47.25	49.02	499.9	0	112	96.29	2.71	0.729	1	111105
uncut strip	10	15	13:00-14:00	Medium	b-3-2	0.576993	0.0181058	1.19919	304	2.72	6	1	2.84	35.28	34.61	35.29	363.44	362.05	28.148	29.211	47.26	49.04	499.9	0	111	96.29	2.71	0.729	1	111105
uncut strip	10	15	13:00-14:00	Medium	b-3-2	3.32323	0.0185265	0.951965	222	1.91	6	1	2.84	34.09	33.19	34.05	398.02	394.12	32.297	33.007	58.22	59.5	499.9	0	114	96.79	291	21.3	0.7	111105
uncut strip	10	15	13:00-14:00	Medium	b-3-2	2.15403	0.035274	0.672041	222	1.91	6	1	2.84	34.09	33.19	34.05	398.02	394.12	32.297	33.007	58.22	59.5	499.9	0	114	96.79	291	21.3	0.7	111105
uncut strip	10	15	13:00-14:00	Medium	b-3-2	2.30981	0.0313597	0.313305	230	1.91	6	1	2.84	34.09	33.2	34.05	398	394.3	32.298	33.004	58.21	59.48	499.9	0	114	96.79	291	21.3	0.7	111105
uncut strip	10	15	13:00-14:00	Medium	b-3-2	2.28013	0.0305983	0.464189	253	1.91	6	1	2.84	34.1	33.2	34.05	397.85	394.67	32.304	33.007	58.2	59.46	499.9	0	114	96.79	291	21.3	0.7	111105
uncut strip	10	15	13:00-14:00	Medium	b-3-2	0.999312	0.0465908	0.555951	281	1.91	6	1	2.84	34.1	33.2	34.06	397.49	394.97	32.309	33.001	58.19	59.43	499.9	0	114	96.79	291	21.3	0.7	111105
uncut strip	10	16	13:00-14:00	Small	b-3-3	0.00883545	0.0777651	1.22404	372	1.83	6	1	2.84	33.99	33.14	33.99	386.44	385.72	32.106	33.725	58.19	61.13	499.9	0	87	96.79	288	22.1	1	111105
uncut strip	10	16	13:00-14:00	Small	b-3-3	-0.471535	0.0784472	1.41734	372	1.83	6	1	2.84	33.99	33.14	33.99	386.44	385.72	32.106	33.725	58.19	61.13	499.9	0	87	96.79	288	22.1	1	111105
uncut strip	10	16	13:00-14:00	Small	b-3-3	0.559433	0.066129	1.20049	372	1.83	6	1	2.84	33.99	33.14	33.99	386.45	385.69	32.105	33.726	58.2	61.14	499.9	0	87	96.79	288	22.1	1	111105
uncut strip	10	16	13:00-14:00	Small	b-3-3	1.44776	0.0609938	1.28444	371	1.83	6	1	2.84	33.99	33.14	33.99	386.49	385.7	32.106	33.724	58.2	61.13	499.9	0	87	96.79	288	22.1	1	111105
uncut strip	10	16	13:00-14:00	Small	b-3-3	1.29284	0.0783979	1.51864	372	1.83	6	1	2.84	33.99	33.13	33.99	386.48	385.75	32.106	33.714	58.18	61.1	499.9	0	87	96.79	288	22.1	1	111105
uncut strip	10	16	13:00-14:00	Small	b-3-3	2.30038	0.0623625	1.7898	254	2.86	6	1	2.84	35.21	35.35	35.23	364.04	359.65	28.156	30.103	47.46	50.74	499.9	0	873	96.29	2.71	0.729	0.7	111105
uncut strip	10	16	13:00-14:00	Small	b-3-3	3.11705	0.0542236	1.98215	256	2.83	6	1	2.84	35.2	35.26	35.23	364.05	359.72	28.158	30.102	47.46	50.74	499.9	0	803	96.29	2.71	0.729	0.7	111105
uncut strip	10	16	13:00-14:00	Small	b-3-3	3.09088	0.062117	1.80504	260	2.8	6	1	2.84	35.2	35.15	35.23	364.03	359.83	28.163	30.092	47.47	50.72	499.9	0	725	96.29	2.71	0.729	0.7	111105
uncut strip	10	16	13:00-14:00	Small	b-3-3	2.95141	0.066683	1.67639	260	2.76	6	1	2.84	35.2	35.04	35.23	363.99	359.78	28.168	30.085	47.48	50.71	499.9	0	713	96.29	2.71	0.729	0.7	111105
uncut strip	10	16	13:00-14:00	Small	b-3-3	2.60585	0.0469164	1.67457	265	2.74	6	1	2.84	35.2	34.95	35.23	363.98	359.96	28.171	30.077	47.49	50.7	499.9	0	722	96.29	2.71	0.729	0.7	111105
uncut strip	10	16	14:30-15:30	Large	b-3-1	0.27343	0.0630949	1.02963	383	1.86	6	1	2.84	32.72	32.01	32.72	403.39	402.68	29.229	30.341	56.58	58.73	499.9	0	46	96.27	47.1	-0.0292	0.7	111105
uncut strip	10	16	14:30-15:30	Large	b-3-1	-0.25517	0.0423957	1.23268	383	1.86	6	1	2.84	32.73	32.01	32.73	403.37	402.65	29.227	30.337	56.55	58.7	499.9	0	46	96.27	47.1	-0.0292	0.7	111105
uncut strip	10	16	14:30-15:30	Large	b-3-1	0.00764308	0.0511954	0.901002	385	1.86	6	1	2.84	32.73	32.01	32.73	403.33	402.67	29.223	30.334	56.53	58.68	499.9	0	46	96.27	47.1	-0.0292	0.7	111105
uncut strip	10	16	14:30-15:30	Large	b-3-1	-0.762154	0.0493469	0.730412	383	1.86	6	1	2.84	32.74	32.01	32.73	403.3	402.61	29.224	30.319	56.5	58.62	499.9	0	46	96.27	47.1	-0.0292	0.7	111105
uncut strip	10	16	14:30-15:30	Large	b-3-1	0.341653	0.0420925	0.812237	377	1.86	6	1	2.84	32.75	32.03	32.74	403.32	402.42	29.222	30.32	56.47	58.59	499.9	0	46	96.27	47.1	-0.0292	0.7	111105
uncut strip	10	16	14:30-15:30	Large	b-3-1	-0.0218299	0.0260579	0.715784	364	1.59	6	1	2.84	31.91	31.41	32.01	393.92	393.1	30.588	31.308	62.3	63.77	499.9	0	40	96.79	290	21	0.7	111105
uncut strip	10	16	14:30-15:30	Large	b-3-1	0.631798	0.0198299	0.771981	364	1.59	6	1	2.84	31.91	31.41	32.01	393.92	393.1	30.588	31.308	62.3	63.77	499.9	0	40	96.79	290	21	0.7	111105
uncut strip	10	16	14:30-15:30	Large	b-3-1	0.601322	0.0328869	0.525096	365	1.59	6	1	2.84	31.91	31.41	32.01	393.95	393.17	30.588	31.307	62.3	63.77	499.9	0	41	96.79	290	21	0.7	111105
uncut strip	10	16	14:30-15:30	Large	b-3-1	0.232666	0.036965	0.576685	365	1.59	6	1	2.84	31.91	31.41	32.01	393.97	393.2	30.589	31.306	62.3	63.76	499.9	0	41	96.79	290	21	0.7	111105
uncut strip	10	16	14:30-15:30	Large	b-3-1	0.754234	0.0400954	0.430564	364	1.59	6	1	2.84	31.92	31.41	32.01	393.98	393.17	30.587	31.304	62.29	63.76	500	0	41	96.79	290	21	0.7	111105
uncut strip	10	15	14:30-15:30	Medium	b-3-2	4.61242	0.0910435	1.40003	296	1.81	6	1	2.84	32.88	32.64	32.92	407.59	401.77	31.016	32.654	59.49	62.63	499.9	0	502	96.26	47.1	-0.0292	0.7	111105
uncut strip	10	15	14:30-15:30	Medium	b-3-2	3.98316	0.0911733	1.3716	297	1.81	6	1	2.84	32.88	32.65	32.92	407.57	401.79	31.019	32.659	59.49	62.64	499.9	0	512	96.26	47.1	-0.0292	0.7	111105
uncut strip	10	15	14:30-15:30	Medium	b-3-2	4.40918	0.0746601	1.58964	297	1.81	6	1	2.84	32.88	32.65	32.92	407.57	401.79	31.019	32.659	59.49	62.64	499.9	0	512	96.26	47.1	-0.0292	0.7	111105
uncut strip	10	15	14:30-15:30	Medium	b-3-2	4.43574	0.0811519	1.51926	298	1.81	6	1	2.84	32.89	32.66	32.92	407.52	401.83	31.021	32.655	59.48	62.62	499.9	0	534	96.26	47.1	-0.0292	0.7	111105
uncut strip	10	15	14:30-15:30	Medium	b-3-2	3.65087	0.0747429	1.30573	300	1.81	6	1	2.84	32.89	32.67	32.92	407.46	401.87	31.019	32.663	59.47	62.63	499.9	0	538	96.27	47.1	-0.0292	0.7	111105
uncut strip	10	15	14:30-15:30	Medium	b-3-2	0.266562	0.0260147	0.91412	371	1.6	6	1	2.84	31.86	31.43	31.92	388.48	388.02	30.547	31.267	62.4	63.87	499.8	0	33	96.76	288	21.1	1	111105
uncut strip	10	15	14:30-15:30	Medium	b-3-2	-0.534723	0.0225845	0.573736	371	1.6	6	1	2.84	31.86	31.43	31.92	388.48	388.02	30.547	31.267	62.4	63.87	499.8	0	33	96.76	288	21.1	1	111105
uncut strip	10	15	14:30-15:30	Medium	b-3-2	-0.209369	0.0250678	0.65334	372	1.6	6	1	2.84	31.86	31.43	31.92	388.51	388.06	30.545	31.27	62.39	63.87	499.8	0	33	96.76	288	21.1	0.7	111105
uncut strip	10	15	14:30-15:30	Medium	b-3-2	0.800622	0.0277717	0.809851	371	1.6	6	1	2.84	31.86	31.43	31.92	388.58	388.12	30.547	31.27	62.4	63.87	499.9	0	33	96.76	288	21.1	0.7	111105
uncut strip	10	15	14:30-15:30	Medium	b-3-2	1.02066	0.0432098	0.706526	371	1.6	6	1	2.84	31.86	31.43	31.92	388.67	388.2	30.546	31.269	62.39	63.87	499.9	0	33	96.76	288	21.1	0.7	111105
uncut strip	10	16	14:30-15:30	Small	b-3-3	1.26808	0.0449384	0.576338	374	1.53	6	1	2.84	31.82	31.26	31.88	389.48	388.86	30.498	31.515	62.42	64.5	499.9	0	42	96.75	288	21.1	0.7	111105
uncut strip	10	16	14:30-15:30	Small	b-3-3	0.0974102	0.0582079	0.927821	374	1.53	6	1	2.84	31.82	31.26	31.88	389.48	388.86	30.498	31.515	62.42	64.5	499.9	0	42	96.75	288	21.1	0.7	111105
uncut strip	10	16	14:30-15:30	Small	b-3-3	-0.060354	0.0626767	0.874724	374	1.53	6	1	2.84	31.82	31.26	31.88	389.51	388.91	30.501	31.519	62.42	64.51	499.9	0	42	96.75	288	21.1	0.7	111105
uncut strip	10	16	14:30-15:30	Small	b-3-3	-0.54352	0.0431435	0.602338	372	1.53	6	1	2.84	31.82	31.27	31.88	389.6	388.93	30.501	31.524	62.42	64.52	499.9	0	42	96.75	288	21.1	0.7	111105
uncut strip	10	16	14:30-15:30	Small	b-3-3	0.862577	0.0463433	0.796313	371	1.53	6	1	2.84	31.82	31.27	31.88	389.66	388.92	30.504	31.532	62.43	64.53	499.9	0	42	96.75	288	21.1	0.7	111105
uncut strip	10	16	14:30-15:30	Small	b-3-3	6.41338	0.125837	2.60257	305	1.91	6	1	2.84	33.24	33.35	33.2	405.15	396.19	30.634	33.714	57.59	63.38	499.9	0	746	96.26	47.1	-0.0292	0.7	111105
uncut strip	10	16	14:30-15:30	Small	b-3-3	5.76626	0.146727	2.8031	304	1.91	6	1	2.84	33.24	33.36	33.2	405.15	396.16	30.632	33.701	57.58	63.35	499.9	0	746	96.26	47.1	-0.0292	0.7	111105
uncut strip	10	16	14:30-15:30	Small	b-3-3	6.43096	0.136116	2.52543	302	1.91	6	1	2.84	33.24	33.36	33.21	405.22	396.14	30.63	33.665	57.57	63.27	499.9	0	747	96.26	47.1	-0.0292	0.3	111105
uncut strip	10	16	14:30-15:30	Small	b-3-3	6.02392	0.123971	2.4481	301	1.92	6	1	2.84	33.25	33.36	33.21	405.28	396.2	30.627	33.624	57.55	63.18	499.9	0	749	96.26	47.1	-0.0292	0.3	111105
uncut strip	10	16	14:30-15:30	Small	b-3-3	6.70792	0.125744	2.68956	294	1.93	6	1	2.84	33.25	33.36	33.21	405.53	396.07	30.618	33.551	57.52	63.03	499.9	0	752	96.26	47.1	-0.0292	0.3	111105
control		18	9:30-10:30	Large	d-1	0.45282	0.124542	0.664296	427	1.34	6	1	2.84	30.91	30.24	30.87	401.79	401.62	31.014	30.871	66.77	66.46	499.9	0	103	96.64	290	20.4	1	111105
control		18	9:30-10:30	Large	d-1	0.760124	0.0148195	0.362919	427	1.34	6	1	2.84	30.91	30.24	30.87	401.79	401.62	31.014	30.871	66.77	66.46	499.9	0	103	96.64	290	20.4	1	111105
control		18	9:30-10:30	Large	d-1	0.0915743	0.00373992	0.698459	416	1.34	6	1	2.84	30.92	30.25	30.88	401.83	401.74	31.017	30.872	66.76	66.45	499.9	0	103	96.64	290	20.4	1	111105
control		18	9:30-10:30	Large	d-1	0.516706	0.00298701	0.513297	410	1.34	6	1	2.84	30.93	30.25	30.88	401.84	401.79	31.016	30.87	66.73	66.41	499.9	0	103	96.64	290	20.4	1	111105
control		18	9:30-10:30	Large	d-1	0.297441	6.13786e-05	0.38027	391	1.34	6	1	2.84	30.92	30.24	30.88	401.81	401.88	31.014	30.861	66.73	66.41	499.9	0	103	96.64	290	20.4	1	111105
control		13	9:30-10:30	Medium	d-2	0.781738	0.00720195	0.518473	466	1.36	6	1	2.84	30.87	30.35	30.84	398.44	398.26	31.022	30.963	66.94	66.81	499.9	0	94	96.64	290	20.4	0.3	111105
control		13	9:30-10:30	Medium	d-2	0.125441	0.0134224	0.638639	466	1.36	6	1	2.84	30.87	30.35	30.84	398.44	398.26	31.022	30.963	66.94	66.81	499.9	0	94	96.64	290	20.4	0.3	111105
control		13	9:30-10:30	Medium	d-2	0.511086	0.0193282	0.331386	469	1.36	6	1	2.84	30.88	30.36	30.85	398.45	398.27	31.022	30.966	66.9	66.78	499.9	0	96	96.64	290	20.4	0.3	111105
control		13	9:30-10:30	Medium	d-2	0.0700755	0.0617655	0.540991	499	1.36	6	1	2.84	30.88	30.36	30.85	398.45	398.22	31.022	30.971	66.91	66.8	499.9	0	98	96.64	290	20.4	0.3	111105
control		13	9:30-10:30	Medium	d-2	0.155316	0.00686536	0.865127	479	1.36	6	1	2.84	30.9	30.37	30.86	398.46	398.29	31.023	30.975	66.83	66.72	499.9	0	102	96.64	290	20.4	0.3	111105
control		16	9:30-10:30	Small	d-3	2.10102	0.0304346	0.152445	334	1.35	6	1	2.84	30.84	30.51	30.88	402.32	401.06	30.981	31.401	66.99	67.9	499.9	0	75	96.64	290	20.4	0.7	111105
control		16	9:30-10:30	Small	d-3	1.26954	0.025634	0.275579	334	1.35	6	1	2.84	30.84	30.51	30.88	402.32	401.06	30.981	31.401	66.99	67.9	499.9	0	75	96.64	290	20.4	0.7	111105
control		16	9:30-10:30	Small	d-3	-0.0934873	0.0439749	0.20967	332	1.35	6	1	2.84	30.84	30.51	30.88	402.28	401	30.98	31.396	66.98	67.88	499.9	0	75	96.64	290	20.4	0.7	111105
control		16	9:30-10:30	Small	d-3	1.54712	0.00855331	0.522126	331	1.35	6	1	2.84	30.84	30.5	30.88	402.27	400.99	30.977	31.382	66.97	67.85	499.9	0	75	96.64	290	20.4	0.7	111105
control		16	9:30-10:30	Small	d-3	1.21417	0.0229834	0.285535	328	1.35	6	1	2.84	30.84	30.49	30.88	402.2	400.89	30.972	31.368	66.96	67.81	499.9	0	74	96.64	290	20.4	0.7	111105
control		18	11:00-12:00	Large	d-1	1.00828	0.036058	0.782168	426	2.06	6	1	2.84	32.97	32.09	32.98	363.86	365.2	27.8	28.541	52.98	54.4	499.9	0	26	96.13	3.78	0.765	0.3	111105
control		18	11:00-12:00	Large	d-1	0.6082	0.0248044	0.87835	426	2.06	6	1	2.84	32.97	32.09	32.98	363.86	365.2	27.8	28.541	52.98	54.4	499.9	0	26	96.13	3.78	0.765	0.3	111105
control		18	11:00-12:00	Large	d-1	0.68821	0.0195423	0.82036	427	2.05	6	1	2.84	32.97	32.08	32.98	363.82	365.18	27.796	28.541	52.97	54.39	499.9	0	25	96.13	3.78	0.765	0.3	111105
control		18	11:00-12:00	Large	d-1	1.6168	0.0294027	0.625213	425	2.05	6	1	2.84	32.98	32.07	32.98	363.83	365.14	27.792	28.539	52.95	54.37	499.9	0	24	96.13	3.78	0.765	0.3	111105
control		18	11:00-12:00	Large	d-1	-0.972978	0.0232729	0.730206	423	2.05	6	1	2.84	32.99	32.06	32.99	363.83	365.1	27.788	28.535	52.91	54.33	499.9	0	22	96.13	3.78	0.765	0.3	111105
control		13	11:00-12:00	Medium	d-2	0.417097	0.0483695	0.974155	348	2.1	6	1	2.84	32.87	32.41	32.93	364.15	363.56	27.679	28.985	53.07	55.57	499.9	0	75	96.13	3.78	0.765	0.7	111105
control		13	11:00-12:00	Medium	d-2	0.504829	0.0420797	1.08765	346	2.1	6	1	2.84	32.87	32.42	32.93	364.14	363.51	27.686	28.961	53.08	55.52	499.9	0	75	96.13	3.78	0.765	0.7	111105
control		13	11:00-12:00	Medium	d-2	0.625232	0.0570683	1.00252	345	2.11	6	1	2.84	32.86	32.41	32.93	364	363.35	27.705	28.918	53.12	55.45	499.9	0	76	96.13	3.78	0.765	0.7	111105
control		13	11:00-12:00	Medium	d-2	0.0498618	0.0541515	1.05711	344	2.11	6	1	2.84	32.86	32.41	32.93	364.02	363.33	27.706	28.913	53.12	55.44	499.9	0	76	96.13	3.78	0.765	0.7	111105
control		13	11:00-12:00	Medium	d-2	0.126455	0.0328459	1.18328	347	2.11	6	1	2.84	32.86	32.42	32.93	363.95	363.38	27.712	28.906	53.14	55.42	499.9	0	75	96.13	3.78	0.765	0.7	111105
control		16	11:00-12:00	Small	d-3	0.592528	0.0475624	1.01527	330	2.16	6	1	2.84	32.92	32.53	32.96	365.02	363.63	27.292	28.744	52.18	54.95	499.9	0	74	96.13	3.78	0.765	0.7	111105
control		16	11:00-12:00	Small	d-3	0.756641	0.0446623	1.28956	331	2.16	6	1	2.84	32.92	32.53	32.97	365.04	363.7	27.292	28.731	52.17	54.92	499.9	0	70	96.13	3.78	0.765	0.7	111105
control		16	11:00-12:00	Small	d-3	0.771917	0.0594001	1.30574	332	2.16	6	1	2.84	32.92	32.53	32.97	365.01	363.74	27.29	28.721	52.17	54.91	499.9	0	68	96.13	3.78	0.765	0.7	111105
control		16	11:00-12:00	Small	d-3	0.556568	0.0577302	1.01265	333	2.16	6	1	2.84	32.92	32.52	32.97	364.95	363.71	27.289	28.724	52.17	54.91	499.9	0	63	96.13	3.78	0.765	0.7	111105
control		16	11:00-12:00	Small	d-3	0.844411	0.058411	1.22299	333	2.15	6	1	2.84	32.92	32.51	32.97	364.93	363.7	27.29	28.72	52.17	54.91	499.9	0	62	96.13	3.78	0.765	0.7	111105
control		18	13:00-14:00	Large	d-1	1.84122	0.0214333	0.325545	325	1.42	6	1	2.84	32.05	31.46	32	393.46	391.92	32.664	33.2	65.91	66.99	499.9	0	126	96.64	288	21.4	0.7	111105
control		18	13:00-14:00	Large	d-1	0.562933	0.0260231	0.290986	328	1.42	6	1	2.84	32.05	31.45	32.01	393.4	391.93	32.664	33.199	65.91	66.99	499.9	0	127	96.64	288	21.4	0.7	111105
control		18	13:00-14:00	Large	d-1	1.38523	0.0240912	0.72149	330	1.42	6	1	2.84	32.05	31.45	32.01	393.42	392.03	32.67	33.192	65.94	67	499.9	0	127	96.64	288	21.4	0.7	111105
control		18	13:00-14:00	Large	d-1	0.157645	0.0158432	0.414559	332	1.42	6	1	2.84	32.04	31.44	32	393.41	392.07	32.666	33.191	65.97	67.02	499.9	0	128	96.64	288	21.4	0.7	111105
control		18	13:00-14:00	Large	d-1	0.070931	0.0258185	0.538426	341	1.42	6	1	2.84	32.06	31.44	32.01	393.38	392.19	32.666	33.201	65.9	66.98	499.9	0	129	96.64	288	21.4	0.7	111105
control		18	13:00-14:00	Large	d-1	0.364832	0.0321355	0.354719	235	1.5	6	1	2.84	32.21	31.54	32.23	417.53	414.07	32.123	32.603	64.17	65.13	499.9	0	61	96.54	295	21.4	0.7	111105
control		18	13:00-14:00	Large	d-1	0.0414374	0.0311584	0.311535	236	1.5	6	1	2.84	32.21	31.53	32.23	417.51	414.03	32.124	32.606	64.17	65.13	499.9	0	61	96.54	295	21.4	0.7	111105
control		18	13:00-14:00	Large	d-1	0.0846882	0.0385084	0.187053	238	1.5	6	1	2.84	32.21	31.53	32.23	417.54	414.08	32.126	32.612	64.18	65.16	499.9	0	61	96.54	295	21.4	0.7	111105
control		18	13:00-14:00	Large	d-1	0.148263	0.0215406	0.6715	235	1.5	6	1	2.84	32.21	31.53	32.23	417.57	414.08	32.128	32.609	64.19	65.15	499.9	0	61	96.54	295	21.4	0.7	111105
control		18	13:00-14:00	Large	d-1	0.728788	0.0216174	0.423785	235	1.5	6	1	2.84	32.22	31.53	32.23	417.56	414.07	32.129	32.611	64.15	65.12	499.9	0	61	96.54	295	21.4	0.7	111105
control		13	13:00-14:00	Medium	d-2	-0.147309	0.0484602	0.627933	360	1.41	6	1	2.84	32.27	31.52	32.19	388.31	387.69	32.998	33.521	65.78	66.82	499.9	0	89	96.64	288	21.4	0.7	111105
control		13	13:00-14:00	Medium	d-2	0.0725473	0.0466982	0.504766	360	1.41	6	1	2.84	32.27	31.52	32.19	388.31	387.69	32.998	33.521	65.78	66.82	499.9	0	89	96.64	288	21.4	0.7	111105
control		13	13:00-14:00	Medium	d-2	0.675787	0.0223087	0.743136	362	1.41	6	1	2.84	32.27	31.51	32.19	388.4	387.82	33.001	33.512	65.78	66.8	499.9	0	89	96.64	288	21.4	0.7	111105
control		13	13:00-14:00	Medium	d-2	-0.362911	0.0386178	0.482152	365	1.41	6	1	2.84	32.28	31.51	32.19	388.52	388	33	33.514	65.74	66.76	499.9	0	89	96.64	288	21.4	0.7	111105
control		13	13:00-14:00	Medium	d-2	-0.0577604	0.0384816	0.468435	369	1.41	6	1	2.84	32.29	31.52	32.2	388.65	388.24	32.995	33.503	65.69	66.7	499.9	0	89	96.64	288	21.4	0.7	111105
control		13	13:00-14:00	Medium	d-2	1.03759	0.0771717	0.759055	385	1.5	6	1	2.84	32.29	31.66	32.35	399.56	398.98	31.985	33.01	63.63	65.67	499.9	0	52	96.54	292	21.8	0.7	111105
control		13	13:00-14:00	Medium	d-2	0.269533	0.0489321	0.9886	385	1.5	6	1	2.84	32.29	31.66	32.35	399.56	398.99	31.988	33.009	63.63	65.66	499.9	0	52	96.54	292	21.8	0.7	111105
control		13	13:00-14:00	Medium	d-2	1.11731	0.0399188	0.635524	385	1.5	6	1	2.84	32.29	31.66	32.35	399.56	398.99	31.988	33.009	63.63	65.66	499.9	0	52	96.54	292	21.8	0.7	111105
control		13	13:00-14:00	Medium	d-2	0.427829	0.0418071	0.903912	384	1.5	6	1	2.84	32.29	31.66	32.35	399.66	399.03	31.987	33.008	63.63	65.66	499.9	0	52	96.54	292	21.8	0.7	111105
control		13	13:00-14:00	Medium	d-2	0.365619	0.0489928	0.827081	386	1.5	6	1	2.84	32.29	31.67	32.35	399.64	399.1	31.987	33.008	63.62	65.66	499.9	0	52	96.54	292	21.8	0.7	111105
control		16	13:00-14:00	Small	d-3	-0.923077	-0.0182569	-0.419594	400	1.67	6	1	2.84	32.44	31.93	32.5	394.51	394.46	32.19	31.94	63.49	63	499.9	0	48	96.53	291	20.6	0.7	111105
control		16	13:00-14:00	Small	d-3	0.908945	-0.0115473	-0.159133	399	1.67	6	1	2.84	32.44	31.93	32.5	394.58	394.54	32.194	31.941	63.5	63	499.9	0	48	96.53	291	20.6	0.7	111105
control		16	13:00-14:00	Small	d-3	0.857351	-0.0143596	-0.453704	399	1.67	6	1	2.84	32.44	31.93	32.5	394.58	394.54	32.194	31.941	63.5	63	499.9	0	48	96.53	291	20.6	0.7	111105
control		16	13:00-14:00	Small	d-3	-0.273946	-0.00505878	-0.204017	407	1.67	6	1	2.84	32.44	31.93	32.5	394.73	394.62	32.198	31.952	63.5	63.02	499.9	0	47	96.53	291	20.6	0.7	111105
control		16	13:00-14:00	Small	d-3	0.541947	0.00647906	-0.0646907	414	1.67	6	1	2.84	32.44	31.92	32.5	394.86	394.68	32.203	31.948	63.51	63.01	499.9	0	47	96.53	291	20.6	0.7	111105
control		16	13:00-14:00	Small	d-3	2.90182	0.0343493	0.390508	247	1.44	6	1	2.84	32.33	31.68	32.29	399.35	395.9	33.1	33.649	65.77	66.86	499.8	0	80	96.63	288	21.4	1	111105
control		16	13:00-14:00	Small	d-3	3.28411	0.03621	0.596199	254	1.44	6	1	2.84	32.33	31.68	32.29	399.27	395.93	33.097	33.652	65.75	66.85	499.8	0	80	96.63	288	21.4	0.7	111105
control		16	13:00-14:00	Small	d-3	1.82921	0.0353197	0.466522	251	1.44	6	1	2.84	32.33	31.68	32.29	399.2	395.84	33.095	33.641	65.74	66.83	499.8	0	80	96.63	288	21.4	0.7	111105
control		16	13:00-14:00	Small	d-3	2.11509	0.0353325	0.51397	259	1.44	6	1	2.84	32.33	31.68	32.29	399.12	395.91	33.092	33.646	65.72	66.82	499.8	0	79	96.63	288	21.4	0.7	111105
control		16	13:00-14:00	Small	d-3	1.80389	0.0113146	0.476379	266	1.44	6	1	2.84	32.34	31.68	32.29	398.91	395.87	33.087	33.641	65.69	66.79	499.9	0	77	96.63	288	21.4	0.7	111105
control		18	14:30-15:30	Large	d-1	1.01429	0.0794213	1.26732	371	1.88	6	1	2.84	32.99	32.16	33.04	398.67	397.42	29.051	30.523	55.28	58.08	499.9	0	47	96.08	47.1	-0.0292	0.7	111105
control		18	14:30-15:30	Large	d-1	-0.019053	0.0701711	1.25547	369	1.88	6	1	2.84	32.99	32.15	33.04	398.75	397.4	29.05	30.523	55.28	58.09	499.9	0	47	96.08	47.1	-0.0292	0.7	111105
control		18	14:30-15:30	Large	d-1	-0.403628	0.0529317	1.08049	368	1.88	6	1	2.84	32.99	32.15	33.04	398.91	397.51	29.048	30.518	55.28	58.07	499.9	0	47	96.08	47.1	-0.0292	0.7	111105
control		18	14:30-15:30	Large	d-1	0.182374	0.0787092	1.41236	366	1.88	6	1	2.84	32.99	32.15	33.04	399.1	397.6	29.044	30.519	55.27	58.08	499.9	0	47	96.08	47.1	-0.0292	0.7	111105
control		18	14:30-15:30	Large	d-1	1.17749	0.0797446	1.34427	361	1.88	6	1	2.84	32.99	32.14	33.04	399.53	397.79	29.043	30.526	55.27	58.09	499.9	0	47	96.08	47.1	-0.0292	0.7	111105
control		18	14:30-15:30	Large	d-1	-1.89256	0.0625406	1.40407	432	1.72	6	1	2.84	32.56	31.52	32.61	393.54	395.52	28.967	30.509	56.46	59.47	499.9	0	25	96.06	52.5	-0.086	0.7	111105
control		18	14:30-15:30	Large	d-1	-2.36254	0.0568253	1.09365	432	1.72	6	1	2.84	32.56	31.52	32.61	393.54	395.52	28.967	30.509	56.46	59.47	499.9	0	25	96.06	52.5	-0.086	0.7	111105
control		18	14:30-15:30	Large	d-1	-1.24672	0.0676452	1.45072	433	1.72	6	1	2.84	32.56	31.52	32.61	393.62	395.67	28.967	30.506	56.46	59.45	499.9	0	25	96.06	52.5	-0.086	0.7	111105
control		18	14:30-15:30	Large	d-1	-2.5716	0.0680417	1.21307	435	1.72	6	1	2.84	32.57	31.53	32.62	393.71	395.81	28.969	30.497	56.45	59.42	499.9	0	26	96.06	52.5	-0.086	0.7	111105
control		18	14:30-15:30	Large	d-1	-2.89511	0.0660492	1.0908	436	1.72	6	1	2.84	32.57	31.53	32.62	393.74	395.89	28.978	30.501	56.46	59.43	499.9	0	26	96.06	52.5	-0.086	0.7	111105
control		13	14:30-15:30	Medium	d-2	3.57897	0.0921117	0.237782	345	1.77	6	1	2.84	33.14	31.99	33.09	402.26	398.11	28.945	31.227	54.62	58.92	499.9	0	156	96.08	47.1	-0.0292	0.7	111105
control		13	14:30-15:30	Medium	d-2	2.31536	0.113326	0.0759488	345	1.77	6	1	2.84	33.14	31.99	33.09	402.26	398.11	28.945	31.227	54.62	58.92	499.9	0	156	96.08	47.1	-0.0292	0.7	111105
control		13	14:30-15:30	Medium	d-2	3.67948	0.0995325	0.253461	345	1.77	6	1	2.84	33.13	31.99	33.09	402.2	398.08	28.948	31.221	54.64	58.93	499.9	0	168	96.08	47.1	-0.0292	0.7	111105
control		13	14:30-15:30	Medium	d-2	2.64139	0.110909	0.75091	347	1.77	6	1	2.84	33.12	31.99	33.09	402.15	398.16	28.947	31.215	54.67	58.96	499.9	0	180	96.08	47.1	-0.0292	0.7	111105
control		13	14:30-15:30	Medium	d-2	3.3794	0.111567	0.816364	347	1.77	6	1	2.84	33.12	32	33.09	402.08	398.13	28.95	31.227	54.7	59	499.9	0	202	96.08	47.1	-0.0292	0.7	111105
control		13	14:30-15:30	Medium	d-2	0.603275	0.0663548	1.44653	368	1.81	6	1	2.84	32.72	31.9	32.72	390.14	389.18	29.176	30.541	56.35	58.99	499.9	0	45	96.06	48.7	-0.0393	0.7	111105
control		13	14:30-15:30	Medium	d-2	0.432092	0.0711559	1.14438	368	1.81	6	1	2.84	32.72	31.9	32.72	390.14	389.18	29.176	30.541	56.35	58.99	499.9	0	45	96.06	48.7	-0.0393	0.7	111105
control		13	14:30-15:30	Medium	d-2	1.32164	0.079887	1.21699	369	1.81	6	1	2.84	32.73	31.9	32.73	390.15	389.23	29.177	30.537	56.32	58.94	499.9	0	45	96.06	48.7	-0.0393	0.7	111105
control		13	14:30-15:30	Medium	d-2	0.27938	0.0665817	0.938582	366	1.81	6	1	2.84	32.74	31.89	32.73	390.17	389.11	29.178	30.532	56.3	58.91	499.9	0	44	96.06	48.7	-0.0393	0.7	111105
control		13	14:30-15:30	Medium	d-2	0.653964	0.0594941	0.3468	368	1.81	6	1	2.84	32.75	31.87	32.73	390.18	389.23	29.176	30.521	56.25	58.85	499.9	0	43	96.06	48.7	-0.0393	0.7	111105
control		16	14:30-15:30	Small	d-3	2.3883	0.112887	1.57286	353	1.73	6	1	2.84	32.67	31.86	32.73	397.04	394.29	29.438	31.329	57.03	60.7	499.9	0	28	96.07	48.7	-0.0393	0.7	111105
control		16	14:30-15:30	Small	d-3	1.71103	0.0962917	1.7379	352	1.73	6	1	2.84	32.67	31.86	32.73	397.17	394.39	29.443	31.329	57.04	60.7	499.9	0	28	96.07	48.7	-0.0393	0.7	111105
control		16	14:30-15:30	Small	d-3	0.800402	0.0938344	1.8502	352	1.73	6	1	2.84	32.67	31.86	32.73	397.28	394.44	29.446	31.341	57.05	60.72	499.9	0	28	96.07	48.7	-0.0393	0.7	111105
control		16	14:30-15:30	Small	d-3	2.14412	0.0939102	1.4778	353	1.73	6	1	2.84	32.67	31.86	32.73	397.34	394.56	29.45	31.348	57.05	60.73	499.9	0	27	96.07	48.7	-0.0393	0.7	111105
control		16	14:30-15:30	Small	d-3	2.21833	0.0882314	1.82566	354	1.72	6	1	2.84	32.67	31.85	32.73	397.51	394.79	29.459	31.346	57.07	60.73	499.9	0	27	96.07	48.7	-0.0393	0.7	111105
control		16	14:30-15:30	Small	d-3	4.35904	0.115491	2.30272	301	1.88	6	1	2.84	32.89	32.33	32.86	395.73	388.36	28.429	31.046	54.41	59.42	499.9	0	160	96.08	47.1	-0.0292	0.7	111105
control		16	14:30-15:30	Small	d-3	4.0531	0.0972658	2.34262	301	1.88	6	1	2.84	32.89	32.34	32.86	395.61	388.28	28.431	31.05	54.42	59.43	499.9	0	174	96.08	47.1	-0.0292	0.7	111105
control		16	14:30-15:30	Small	d-3	5.35289	0.121749	2.04236	300	1.89	6	1	2.84	32.89	32.34	32.86	395.54	388.12	28.43	31.049	54.42	59.43	499.9	0	188	96.08	47.1	-0.0292	0.7	111105
control		16	14:30-15:30	Small	d-3	5.35353	0.107298	2.42561	299	1.89	6	1	2.84	32.88	32.35	32.86	395.48	388.03	28.434	31.041	54.44	59.43	499.9	0	200	96.08	47.1	-0.0292	0.7	111105
control		16	14:30-15:30	Small	d-3	4.95706	0.112726	1.93554	300	1.89	6	1	2.84	32.87	32.35	32.86	395.3	387.95	28.435	31.03	54.47	59.45	499.9	0	237	96.08	47.1	-0.0292	0.7	111105
